# Supplementary material for: Metabolomic and proteomic changes induced by growth inhibitory concentrations of copper in the biofilm-forming marine bacteriumPseudoalteromonas lipolytica
Source: Royal Society of Chemistry journal article supplement (doi:10.1039/c9mt00184k), 2019-01-01
Supplement: c9mt00184k2.xlsx [file c9mt00184k2.xlsx]

## Sheet: Matrix model #3
Feature	Annotationa	Observed ion(s)	Mz med (Da)	RT med (s)	PLS-DA (Comp. 1)		Biofilm control							Biofilm Cu-1000							Biofilm Cu-1400							Planktonic control							Planktonic Cu-1000							Planktonic Cu-1400
					VIP number	VIP Score	Biofilm control - Replicate 1	Biofilm control - Replicate 2	Biofilm control - Replicate 3	Biofilm control - Replicate 4	Biofilm control - Replicate 5	Mean	SD	Biofilm Cu-1000 - Replicate 1	Biofilm Cu-1000 - Replicate 2	Biofilm Cu-1000 - Replicate 3	Biofilm Cu-1000 - Replicate 4	Biofilm Cu-1000 - Replicate 5	Mean	SD	Biofilm Cu-1400 - Replicate 1	Biofilm Cu-1400 - Replicate 2	Biofilm Cu-1400 - Replicate 3	Biofilm Cu-1400 - Replicate 4	Biofilm Cu-1400 - Replicate 5	Mean	SD	Planktonic control - Replicate 1	Planktonic control - Replicate 2	Planktonic control - Replicate 3	Planktonic control - Replicate 4	Planktonic control - Replicate 5	Mean	SD	Planktonic Cu-1000 - Replicate 1	Planktonic Cu-1000 - Replicate 2	Planktonic Cu-1000 - Replicate 3	Planktonic Cu-1000 - Replicate 4	Planktonic Cu-1000 - Replicate 5	Mean	SD	Planktonic Cu-1400 - Replicate 1	Planktonic Cu-1400 - Replicate 2	Planktonic Cu-1400 - Replicate 3	Planktonic Cu-1400 - Replicate 4	Planktonic Cu-1400 - Replicate 5	Mean	SD
M375T202			375.145	202.493	1	1.66	273174	46256.1	29550.8	29115.8	62574.5	88134.2	104357	206108	111318	350286	77886.2	137276	176575	107924	908501	1.62124e+06	636806	1.35159e+06	247990	953226	548731	34047.5	15999.5	17809.2	350154	556002	194802	246849	839956	606415	732886	678003	179015	607255	254130	68048.7	74980.3	45899.4	94784.2	59131.2	68568.7	18245.5
M391T103			391.14	103.114	2	1.544	291055	73382.9	80554.7	67616.2	118245	126171	94267.6	613042	689560	924947	384946	722922	667083	195345	1.158e+06	1.06006e+06	1.00774e+06	888088	356064	893991	316077	40431.8	26949.6	27048.3	214018	545591	170808	223992	1.23605e+06	945925	1.09153e+06	1.40439e+06	435131	1.02261e+06	369824	60864.8	69237	41305.8	68352.7	49301.8	57812.4	12204.8
M287T204_1			287.101	203.512	3	1.537	740450	103866	211838	184189	261455	300360	252554	195069	130902	335962	118465	142006	184481	89570.5	530121	1.06636e+06	440302	878809	353452	653808	304926	476388	286154	338602	1.41182e+06	799613	662516	464077	262759	250658	230875	163326	94272.2	200378	70676.9	49575.7	96490.8	65553.5	121550	87476.4	84129.3	27853.8
M229T74_1			229.059	73.988	4	1.441	313062	131588	100741	85502.5	137544	153688	91654	600066	554161	747068	571353	635907	621711	76621.1	965588	711087	797860	951286	534251	792014	179249	85992.7	39214.2	57036.2	163162	344836	138048	124933	1.5466e+06	1.52007e+06	1.66227e+06	1.87275e+06	928253	1.50599e+06	351626	618500	680881	539959	596760	490898	585399	73035.4
M285T123_2			285.085	122.636	5	1.324	232699	109084	185797	73168.6	139479	148045	62827.9	562481	588206	415918	422096	805144	558769	158640	302345	509490	309422	174628	139109	286999	145550	136067	68613.3	105815	136869	133624	116198	29571.3	172258	194597	144908	141497	70001	144652	47009.1	26764.3	18229.5	17179.1	29817.9	31478.8	24693.9	6611.35
M355T342			355.369	341.902	6	1.305	28331.4	167094	66104.9	1.01465e+06	2.10213e+06	675661	894281	141297	40333.9	70596.4	37194.9	57900.1	69464.6	42381.9	120638	129316	163449	319118	35764.3	153657	103748	154153	73037.7	113522	293122	230036	172774	88836.1	153313	323337	912015	376604	124007	377855	317474	170322	214583	342791	106296	59751.6	178749	109173
M347T360			347.219	360.486	7	1.295	168763	34761.8	216330	177622	202464	159988	72540	68089.2	65001.6	121257	67828.5	49071.8	74249.5	27424	91904	70403.8	53573.7	111980	29191.6	71410.7	32278.1	25187.8	40909.6	38370.9	32199.7	144972	56328	49924.4	449550	423874	236193	503138	407873	404125	100589	228094	122069	169461	92922.3	88226.8	140154	58836
M147T65			147.055	65.3955	8	1.286	60963.2	297130	26378.7	29827.9	34933.6	89846.6	116669	61612.8	46211.8	105963	62409.3	74761.5	70191.6	22414.6	142587	205909	312007	170869	305530	227380	77642.5	113044	59389.8	81561.1	141795	124340	104026	33232.2	720318	608583	729309	1.05089e+06	482272	718274	211240	200494	179662	161010	162683	157054	172180	18037.4
M120T297			120.045	297.339	9	1.253	43312	41408	27288.8	26106	39534.6	35529.9	8183.46	60840.7	53268	102510	68009.2	92653.8	75456.3	21148.5	77277.3	135736	78129.3	154333	44209.1	97936.9	45593.7	32820.8	51754.6	28513	72166	152855	67621.9	50689.5	839359	786168	732744	1.06588e+06	505433	785917	201701	265403	135046	147011	150680	157466	171121	53329.7
M290T280_2			290.093	280.214	10	1.245	889523	76291.5	384618	366717	347737	412977	294811	9388.78	9226.92	254697	100068	6292.1	75934.6	107549	94999.4	101870	54451.4	25225.5	8285.23	56966.4	41371.9	145031	225355	238809	586723	449217	329027	182753	2543.05	23336	3675.33	7028.7	35599.6	14436.5	14484.6	1682.18	1853.58	1280.91	1853.98	1243.03	1582.74	301.377
M688T491	PE (C16:1, C16:1)	[M+H]+	688.491	490.647	11	1.232	109284	54348.8	68031.6	50825.3	21841.8	60866.4	31866.3	141570	244651	134820	153157	110129	156865	51537	159912	92053.7	281425	277860	580792	278409	187226	610499	756.916	1.04605e+06	184583	217375	411854	418373	1.17193e+06	1.38685e+06	1.28155e+06	217311	437984	899125	532932	2.98751e+06	3.68569e+06	3.14559e+06	3.75874e+06	2.58396e+06	3.2323e+06	492567
M703T505	PE (C17:1, C16:0)	[M+H]+	702.507	505.135	12	1.221	5252.13	5778.79	4958.46	5288.34	2486.73	4752.89	1300.59	15659.2	30405.5	13763.4	17347	17778.5	18990.7	6574.42	15994.3	9849.48	23483.3	9639	78364.7	27466.2	29009.8	15618.2	32340.7	22038.3	5010.02	12616.3	17524.7	10298.4	265.382	51897.8	42780.5	5604.96	11321.1	22373.9	23346.5	462868	800033	470072	753461	1.15492e+06	728270	285007
M531T508			531.408	507.516	13	1.195	8172.73	11568	18644	36064.8	12796.7	17449.2	11070.9	27304.1	19984.6	7061.73	19429.5	19137.2	18583.4	7276.44	2821.56	10307.7	13406.7	46938.7	4934.74	15681.9	17971.8	964878	678258	1.01352e+06	9142.83	20198.3	537199	493918	4595.72	10009.1	36007.3	6081.49	99791.7	31297.1	40359.8	5716.29	7104.21	8933.95	2355.52	3138.23	5449.64	2732.46
M385T345_2			385.379	345.145	14	1.187	207126	618381	451959	2.73458e+06	221958	846802	1.06904e+06	263540	66852.7	63635.1	92550.4	181812	133678	86954.2	217523	100385	208948	548523	163474	247771	174430	28246	15609.6	26499.4	700833	591174	272472	343217	138849	127255	613369	142289	57840.2	215920	224821	158495	229824	287127	116021	48551.4	168004	93639.6
M327T318			327.337	317.938	15	1.162	21742.8	117450	61368.8	463723	602279	253313	262191	55973.5	27668.3	50963.5	32168.2	65655.6	46485.8	16098.4	82916	54937.7	103133	256906	18279.4	103234	91621	130238	38162	96428.9	106758	227034	119724	68900.6	201098	461265	936019	243678	99224.7	388257	333483	154230	376218	365686	83337.2	44452.7	204785	156756
M413T301_1	LOL (C18:1)	[M+H]+	413.337	300.854	16	1.139	454010	481112	731471	772071	651542	618041	144369	482706	515074	628708	539226	523818	537906	54803.1	603071	401505	597619	539173	866071	601488	168744	3.35574e+06	2.44004e+06	2.61825e+06	4.03287e+06	2.3938e+06	2.96814e+06	709762	2.61432e+06	3.42971e+06	2.86692e+06	3.33281e+06	1.74134e+06	2.79702e+06	678247	852222	597693	398169	1.05601e+06	604630	701746	255229
M622T404_1	OL (C16:1, C16:1)	[M+H]+	621.52	404.318	17	1.121	652242	553255	408520	585273	433057	526469	103238	235004	556957	264600	440437	304487	360297	135156	249733	191726	668954	294116	1.26339e+06	533584	448812	2.41325e+06	3.11114e+06	1.92598e+06	5.44104e+06	4.85839e+06	3.54996e+06	1.5338e+06	3.75607e+06	2.75567e+06	3.56572e+06	4.29473e+06	3.95118e+06	3.66467e+06	575216	1.07259e+06	2.04326e+06	895907	878899	1.05984e+06	1.1901e+06	485296
M598T409_1	OL (C14:0, C16:0)	[M+H]+	597.52	408.641	18	1.121	701820	779516	444232	719424	614630	651924	130243	303613	677940	98224.3	583940	513527	435449	233479	284731	180859	820108	266177	1.05063e+06	520501	389367	2.88236e+06	3.61558e+06	2.58922e+06	4.34134e+06	4.53879e+06	3.59346e+06	861340	4.0701e+06	2.95318e+06	3.5561e+06	4.19298e+06	4.00972e+06	3.75642e+06	509527	1.77769e+06	1.53423e+06	1.64329e+06	1.32767e+06	1.73789e+06	1.60415e+06	180877
M678T434_1	OL (C18:1, C18:1)	[M+H]+	677.582	434.179	19	1.12	1.87505e+07	1.03942e+07	1.16734e+07	1.17678e+07	8.70988e+06	1.22591e+07	3.83396e+06	9.39994e+06	1.60195e+07	2.55019e+06	1.48292e+07	1.15304e+07	1.08658e+07	5.33874e+06	1.19175e+07	9.43368e+06	1.90616e+07	1.51811e+07	1.94867e+07	1.50161e+07	4.3916e+06	1.62574e+07	2.15459e+07	1.68014e+07	2.09449e+07	2.34074e+07	1.97914e+07	3.11904e+06	2.01286e+07	1.65274e+07	1.31235e+07	2.54713e+07	2.15202e+07	1.93542e+07	4.73081e+06	1.04041e+07	4.13669e+06	7.19516e+06	6.8635e+06	3.37721e+06	6.39533e+06	2.79015e+06
M413T106			413.122	105.61	20	1.11	54034.9	18742.3	14988.4	17345.3	27666.2	26555.4	16093.7	219643	140831	205354	87849.5	161934	163122	52778.7	267961	262639	170130	199450	70995.4	194235	80484.3	5848.03	4973.21	5272.46	31024.9	69176.3	23259	27972	157802	113168	135006	173402	54013.3	126678	46593.6	8043.04	11890.4	6817.13	9510.44	7267.49	8705.71	2053.31
M233T51_2			233.129	50.915	21	1.08	48926.9	3220.01	32979.7	26121.4	13973.9	25044.4	17559.6	5617.86	1644.94	5491.46	3790.1	2688.07	3846.49	1734.62	13543.3	20426.3	5565.59	27830.6	645.273	13602.2	10971.4	221899	164624	234145	144725	196197	192318	37655.1	27302.9	19426.4	25566.6	21529.5	4535.57	19672.2	9022.19	6634.4	7650.48	5358.53	7682.91	5677.71	6600.81	1080.42
M287T155			287.101	154.631	22	1.078	74044.8	13774.2	29010.5	24584.6	32199.9	34722.8	23058.8	27461.4	17255	42552.7	14017.4	15857	23428.7	11895.5	69472.5	223968	46324	117098	38679.2	99108.3	76206.3	65442	81972.3	53558.2	214913	149269	113031	67932.8	41928.1	40404.9	28486.1	23664.5	18534	30603.5	10278.9	10226	11704.3	9350.59	16139.9	14135.7	12311.3	2804.88
M223T62			223.07	61.643	23	1.078	4307.79	6551.64	5252.94	7518.12	6174.5	5961	1230.19	73797.3	53177.3	88692.7	54486.8	59831.1	65997	15089.6	142280	125903	108392	177143	73510.1	125445	38549.7	1621.13	2897.26	2217.54	6356.29	3541.69	3326.78	1840.4	29686.9	26557.2	29278.5	15035.5	12869.3	22685.5	8098.73	7542.25	10974.3	6114.25	14646	10591.7	9973.71	3317.43
M596T400	OL (C14:0, C16:1)	[M+H]+	595.504	399.599	24	1.073	271219	313074	229405	304263	290984	281789	33257.3	198177	293049	184966	253114	2473.88	186356	111573	134665	140908	325284	126547	844217	314324	307619	1.08294e+06	1.4299e+06	965994	3.09909e+06	3.52969e+06	2.02152e+06	1.20217e+06	2.05931e+06	1.16263e+06	1.50151e+06	2.81269e+06	2.23673e+06	1.95457e+06	644083	519022	979725	413647	472319	992889	675520	286192
M311T400_1			311.258	399.826	25	1.058	124673	148652	127398	165208	84780.5	130142	30279.2	117750	328540	152055	162529	246546	201484	85360.8	143624	140665	342339	292604	442541	272355	130561	1.1603e+06	1.08965e+06	1.01625e+06	1.57103e+06	1.17935e+06	1.20332e+06	215379	2.15357e+06	1.42235e+06	2.03944e+06	2.16159e+06	1.4935e+06	1.85409e+06	365728	3.6492e+06	713277	3.41977e+06	225063	282615	1.65798e+06	1.72527e+06
M351T411_2			351.33	410.545	26	1.054	91851.1	28821.8	70309.6	239.812	32058	44656.1	36289.5	50128.4	1201.27	140422	99971.2	279615	114268	106214	1006.28	1613.69	1174.88	1578.41	884.207	1251.5	331.27	1386.38	3197.78	3486.53	799462	2625.14	162032	356336	687.74	772288	1098.59	1564.41	1799.49	155488	344802	4033.66	5993.37	5539.03	4651.79	6850.79	5413.73	1107.02
M347T114			347.107	114.164	27	1.048	18275.8	31983.9	23209.9	30095	28824	26477.7	5631.57	77823.9	78755.7	84891.3	82142.3	104968	85716.2	11122.3	30514.7	20641.6	59779.7	15682.4	33440.7	32011.8	17111.9	29336.7	25613.9	27567.6	21716.3	39881.9	28823.3	6799.66	33989.9	33488.9	35081.2	36364.5	28161.3	33417.2	3138.98	28965.5	29373.4	26844.7	31048.4	29913.7	29229.2	1545.5
M325T412	OL (C16:0, C16:0)	[M+H]+	325.274	412.301	28	1.046	4838.72	8020.36	8807.02	5859.28	59471.2	17399.3	23573.1	7290.35	15921.4	8002.4	9451.27	15855.3	11304.1	4256.67	27944.2	22039.3	12527.2	10077	13137.1	17145	7548.51	8812.56	4891.87	7514.36	3621.58	7263.83	6420.84	2109.52	11150.4	7832.2	12304.7	4711.67	6642.71	8528.35	3152.13	103559	758696	201686	353165	566629	396747	267290
M147T74			147.055	74.3615	29	1.031	35246.1	30192.6	14995.2	12240.3	16347.7	21804.4	10230.5	98380.5	63988.9	93854.2	69273.2	77690.5	80637.5	15037.5	136135	114915	105766	127847	77680.7	112469	22681	20512.3	19040	17221.5	28625.2	48298.4	26739.5	12816	262499	237336	286438	325994	199519	262357	47969.6	77866.8	73920	67969.6	74815.6	68506.4	72615.7	4259.91
M626T424_1			625.551	423.842	30	1.03	3.13817e+06	3.99985e+06	2.80021e+06	3.66253e+06	1.95183e+06	3.11052e+06	796122	2.06498e+06	2.51378e+06	803837	2.87748e+06	2.98334e+06	2.24868e+06	884126	1.88503e+06	1.28785e+06	3.30114e+06	1.75075e+06	3.18296e+06	2.28155e+06	905332	7.36656e+06	9.19438e+06	7.81394e+06	7.93477e+06	7.87681e+06	8.03729e+06	684635	6.02383e+06	5.2687e+06	4.98048e+06	6.90415e+06	7.66775e+06	6.16898e+06	1.12148e+06	4.18596e+06	1.99235e+06	2.93061e+06	1.95798e+06	998855	2.41315e+06	1.20365e+06
M369T344			369.384	344.204	31	1.029	10802.2	171454	23917.8	192657	777298	235226	314141	28066	9225.5	15840.1	12692.6	16924.5	16549.7	7102.63	23389.2	28285.7	51176.2	51433.2	18352	34527.3	15713.4	78082	34120.6	65898.1	67909.7	43219.2	57845.9	18387.8	22026.5	77321	109863	52502.4	71016.2	66545.8	32371.5	24213.9	30636.4	62582	17359.8	14592.1	29876.8	19316.9
M132T42			132.077	42.3645	32	1.028	91070.2	192921	304326	289266	321556	239828	96970.2	106992	108060	172008	145191	141629	134776	27510.4	129666	207221	233580	283624	475373	265893	129654	643857	578470	438749	382.263	835133	499318	313263	823005	911413	996419	842697	917546	898216	68794.3	1.45477e+06	1.03645e+06	1.29722e+06	1.24294e+06	1.35065e+06	1.27641e+06	155288
M664T424			663.566	424.209	33	1.015	307755	352290	250792	397565	190772	299835	81647.7	568974	1.42233e+06	259151	888343	999500	827660	440729	513689	313725	1.26984e+06	428335	1.28606e+06	762331	476048	469614	568327	503882	1.005e+06	899899	689343	245607	870442	737014	933738	738327	695974	795099	101636	1.95674e+06	2.02176e+06	1.67185e+06	1.57654e+06	1.37358e+06	1.72009e+06	269265
M676T498	PE (C16:1, C15:0)	[M+H]+	676.491	498.119	34	1.014	5953.72	2780.92	2286.83	2888.65	1405.03	3063.03	1718.83	4669.06	5607.23	6858.62	4968.65	5310.34	5482.78	846.261	8596.45	3753.71	6533.16	9120.85	35038.2	12608.5	12714.8	14311.9	18318.4	13613.3	3595.22	7103.74	11388.5	5929.05	12308.1	24775.4	17853.5	3597.4	4769.23	12660.7	8920.13	218112	350968	209513	332498	427790	307776	92972.1
M664T440	OL (C18:1, C17:1)	[M+H]+	663.567	439.922	35	1.012	73072.4	85870.6	21486.1	81661.1	87855.1	69989	27702.4	196324	217715	50090.2	178645	266239	181803	80604.3	178307	137947	68048.4	107824	86270.2	115679	43627.4	67897.4	67268	77734.6	87914.9	55007	71164.4	12355.8	151427	154589	223505	139672	90836.7	152006	47468	260777	1.05678e+06	571432	388099	1.18301e+06	692020	408351
M329T401_1	MAG (C16:1)	[M+H]+	329.269	400.812	36	1.003	297473	365353	317320	414495	153025	309533	98531.4	290890	765656	369624	406365	528565	472220	185083	368276	226645	755525	677575	995490	604702	308057	1.63878e+06	1.70787e+06	1.50262e+06	1.76865e+06	1.65106e+06	1.6538e+06	98998.1	2.41578e+06	1.93274e+06	2.26746e+06	2.34731e+06	2.03503e+06	2.19966e+06	207034	3.49914e+06	536204	3.2992e+06	134275	174943	1.52875e+06	1.71606e+06
M120T60			120.045	59.547			43898.5	44188.8	41153	43743.9	72382.3	49073.3	13087	41272.2	36968.4	73033.7	49999.8	48365.6	49927.9	13957	70835.3	96452.3	115093	80287.9	77913.5	88116.3	17756.9	29106.4	21179.4	18925.5	46800.3	63590.7	35920.4	18951.1	129478	116883	132239	125685	70200.5	114897	25648.8	63491.3	64954	57537.7	72459.3	66706.6	65029.8	5397.06
M123T46			123.055	45.958			31589.5	12562.7	12495.6	13053.7	18012.5	17542.8	8184.71	42126.1	21663.3	16198.9	28305.9	23448.2	26348.5	9825.24	22065.2	14524.8	15330.9	20318.4	29073.8	20262.6	5876.5	408209	179148	369981	33487.6	78965.3	213958	168879	29666.8	33728	34924.6	32434.8	29136.7	31978.2	2518.34	66079.1	83853.8	73982.8	82988.8	78175.5	77016	7290.25
M132T62			132.044	62.074			346396	11550.1	71340.8	74542.3	41724	109111	135078	37013.5	17516.3	19743.7	12111	34644.8	24205.9	10999.5	59823.5	37960.2	16080	66080	5481.15	37085	26450.6	317879	157162	261639	149516	238063	224852	71483.1	59242.4	37140.4	65358.2	76128.5	6414.68	48856.8	27670	15636.2	31788.9	17429.2	16547	13704.8	19021.2	7269.68
M167T259			167.013	259.185			41426.7	1.28679e+06	270945	156326	231005	397299	504860	160896	173628	141225	269843	144024	177923	53041.3	219250	234063	265235	345161	275045	267751	48834.1	89373.9	105318	119737	196320	148291	131808	42075.9	118592	132365	91150.2	102533	111179	111164	15650.1	91520.1	92645.1	110883	97379.6	99518.1	98389.1	7722.66
M171T181			171.15	181.448			2059.21	2311.74	1665.11	3138.67	2543.37	2343.62	550.972	1761.22	1463.83	1832.36	1044.93	2795.31	1779.53	646.964	35992	33769.1	20374.3	28196.5	23551.4	28376.7	6603.5	3807.28	2875.72	3923.37	4295.84	2541.88	3488.82	743.997	4608.37	3964.17	8038.75	4837.93	3617.69	5013.38	1760.43	2818.27	2984.13	2068.3	3054.36	2847.11	2754.43	395.652
M182T345			182.102	344.963			54307.6	58936.9	62104.6	56170.9	61507.6	58605.5	3360.64	7109.32	4963.24	5880.59	5621.36	6559.06	6026.72	832.477	6143.54	4718.14	6480.81	37424.1	4346.59	11822.6	14340.4	77453.5	62555.2	76501	66948.3	73866.4	71464.9	6457.08	85152.5	89700.7	78388.4	83880.4	69920.7	81408.5	7582.53	32648	27910.2	23729	22874.5	25488.9	26530.1	3925.15
M197T65			197.09	64.955			605.734	5294.16	3914.15	4551.78	3929.66	3659.1	1798.03	2300.44	2181.28	4877.38	3984.38	4134.76	3495.65	1195.05	145349	3625.51	4065.73	4689.88	4415.4	32429.1	63125.5	5300.33	6292.07	474344	392626	4771.01	176667	236216	12207.9	7641.17	7440.56	7751.98	6165.12	8241.34	2306.78	5479.95	5547.09	6411.92	6623.16	5807.42	5973.91	516.542
M231T200			231.077	199.986			2280.23	1923.31	1724.65	1758.5	4045.15	2346.37	974.851	19079	18734.4	25369.9	15056.7	42412.3	24130.4	10871.2	21290.7	22829.3	26539.3	41793.2	12710.4	25032.6	10652.3	2568.8	2284.17	2618.78	4114.25	3347.17	2986.63	742.441	166823	150916	160396	217728	95417.8	158256	43638.8	38804.6	35354.4	31059.1	33111.7	30412.5	33748.5	3424.54
M233T133			233.093	132.963			156489	18008.7	35928.1	34260.6	44189	57775.1	55992.5	46339.3	26910	43135.8	30124.3	21276.5	33557.2	10746.1	110049	246173	84758.7	111189	60581.8	122550	72173.8	22851.1	35138.9	27064.8	79568.2	90726.2	51069.9	31666.7	69095.3	66811.9	65110.7	66728.8	31428.6	59835	15942.9	21274.1	20607.4	22591	23961.2	21756.3	22038	1295.56
M237T244			237.103	243.597			1739.01	1723.7	1599.06	1910.77	2841.23	1962.75	503.465	1377.25	936.852	4141.16	2643.17	1616.47	2142.98	1280.74	11888.5	12889.3	29415.6	19077	26354.5	19925	7845.62	3237.89	2985.16	4558.57	6221.55	5090.76	4418.78	1338.92	128409	176154	114660	158862	114604	138538	27720.3	70731.8	56185.3	52731	62128	51106.9	58576.6	8000.71
M239T289			239.119	289.284			4322.36	2990.91	2283.58	350.088	2173.08	2424	1441.26	4342.73	3849.66	476.588	5550.84	498.074	2943.58	2326.1	3899.07	3392.97	6024.16	9803.78	3132.79	5250.55	2788.03	3326.36	3003.66	2611.06	10684.8	5844.37	5094.05	3371.92	150534	96466	125748	187763	38530.4	119808	56453.8	85321.1	57464.1	60128.4	62622.4	56237.9	64354.8	11977.2
M256T131			256.077	131.21			79048.6	10883.4	18994.4	13877.2	25161.6	29593	28173	21940.7	15444.8	32315.1	7983.93	15208.7	18578.6	9129.87	49564.2	88880.2	37575.9	75695.3	13682.4	53079.6	29991.7	24845.6	14643.6	17064.9	84186	20769.9	32302	29259.7	10409.1	9144.5	14995.9	12583.8	6753.86	10777.4	3164.24	5928.02	5629.62	4729.74	727.517	693.22	3541.63	2621.97
M267T293			267.075	293.298			21324.8	11741.9	17050.8	13329.9	10523.2	14794.1	4400.07	65071.1	50630.5	91822.8	64058.9	59408.6	66198.4	15418.5	58724.5	96453.5	53033.9	73875.8	41962.6	64810	21102.2	6375.6	13139.2	7253.2	27886.6	26476.7	16226.3	10345.5	81388.7	86413.7	68881.3	94211.8	86296.1	83438.3	9343.39	17764.6	11941	12018.5	16997.6	14282.4	14600.8	2720.23
M271T263			271.275	263.213			18023.4	31471.9	75795.2	83077.8	270138	95701.3	101419	52736.6	18572.3	33576.9	57127.9	46504.9	41703.7	15682.7	125663	24233.1	57186.4	72550.3	14578.2	58842.2	44194.9	82937	19929.6	65581.2	59525.4	77512.6	61097.2	24818.3	94119.8	335253	203956	155839	59651.7	169764	107931	41253.3	606105	595236	95056.3	51070.6	277744	295510
M279T51			279.135	50.835			15003.2	62316.5	86391	67031.5	56139.4	57376.3	26251.2	83949.4	60216.7	98314.6	110089	71925.3	84899	19955.9	89754	127763	106101	130816	155286	121944	25057.2	47649.8	50580.4	35437.6	26337.5	55568.9	43114.8	11956.4	85942.9	94894.9	94251.7	71164.8	77213.3	84693.5	10439.9	67917.2	63039.7	57228.6	67884.2	68078.1	64829.6	4753.82
M284T452			284.295	451.966			202295	288106	222559	194573	18450.8	185197	100213	182991	220997	3485.25	115738	333678	171378	122701	177283	3649.62	7944.15	84872.4	4874.07	55724.6	76168.5	22022.2	13090.8	21230	16498.1	3777.55	15323.7	7406.65	3966.75	3518.84	7231.35	3857.4	15472.2	6809.32	5070.64	3109.82	827.535	1869.93	1416.72	681.429	1581.09	977.841
M285T202			285.122	202.002			4358.79	873.248	2162.95	2922.41	6442.78	3352.04	2139.46	3528.46	2989.78	5284.31	3921.16	3378.55	3820.45	883.683	9393.39	8432.55	13826.8	11292.5	5961.86	9781.43	2966.8	5916.37	6376.77	4974.75	19469.7	15172.3	10382	6533.68	112693	179205	108191	177132	109539	137352	37303.1	71782	55834.9	52273.2	45651.1	38499.9	52808.2	12504
M287T113			287.101	113.178			54102.3	7591.85	21647.2	19434.2	15085.4	23572.2	17890.7	21140.6	10655	22394	8194.77	8738.14	14224.5	6960.11	34279.4	231529	26603.8	58337	19480.2	74045.8	89242.8	61009.8	38736	39124.4	164811	98306.3	80397.4	53059.7	30122.8	27629.3	27265.1	21112.6	13803.9	23986.8	6588.2	7109.09	11577.7	7473.63	12103.7	8464.74	9345.77	2338.35
M297T383			297.242	383.217			19583.9	30491	17035.9	18586.6	20032	21145.9	5349.14	16851.1	15656.7	16483.6	14727.6	22197.9	17183.4	2920.06	13821	16115.7	13121.5	15772.7	17659	15298	1829.43	73577.5	38317.1	68037.7	34326.5	41767.5	51205.3	18192.8	25978.5	21658	31778	28239.1	33682	28267.1	4758.32	71259.5	812548	78458.2	512260	811753	457256	369935
M299T402			299.259	401.946			119923	249844	350004	290151	237206	249426	84697.8	178982	106575	200152	193156	153916	166556	37908.4	201093	173551	133752	151564	75439.4	147080	47297.6	340369	88512.2	103287	248087	46574.4	165366	123835	175197	271888	206895	145951	118050	183596	59418.6	61109.5	4964.87	33223.1	12485.5	5020.87	23360.8	24058.6
M301T116_2			301.126	116.046			14727.4	465.037	17303.1	16553.8	17210.5	13252	7222.64	16405.6	14728.4	15781.2	16401.5	15294.7	15722.3	724.986	15823.2	910.855	16884.7	14839.9	14399	12571.5	6588.5	281815	178099	222833	272293	218474	234703	42546.7	159125	143597	167784	146641	145731	152575	10451	193080	195070	153078	227057	201987	194054	26613.8
M301T219			301.116	219.069			33287.7	5981.94	11918.1	9652.5	13963.7	14960.8	10664.5	11604	7650.26	20191.2	6730.31	11400.1	11515.2	5318.05	35330.7	92788.8	25689.9	68280.9	16422	47702.5	31907.4	166019	77750	73828.6	409849	188949	183279	136729	101997	102932	88642.1	107698	40314.9	88317	27752	24819.2	24118.7	21355.5	25379.2	25529.5	24240.4	1705.22
M301T97			301.126	97.377			84070.3	104474	119308	132809	95600.1	107252	19231.4	76683.4	86397.1	99665.2	77175	94610.5	86906.2	10266.6	111689	88423.1	141502	117062	96600	111055	20522.2	618563	411723	501314	630358	546137	541619	89878.9	575353	531387	479065	614764	510455	542205	53561.4	304796	359713	299472	331405	287283	316534	29026.1
M303T427			303.29	427.052			8577.87	14033	15230.8	39423.5	31676.3	21788.3	13099.9	22487.7	8106.49	15849.8	15324.7	38352.8	20024.3	11440.6	13226.8	16334.8	10566.4	37372.4	3663.47	16232.8	12708.5	16640.7	27435.2	31196.3	30007.3	6796.62	22415.2	10455.1	4870.44	5828.08	22771.2	5468.59	15313.9	10850.5	7936.88	63945.6	383039	279643	65401.2	287520	215910	143934
M317T115			317.111	114.651			88822	37895.7	32090.4	32821.9	58946.5	50115.3	24235.7	132094	116967	147903	63950.5	134683	119120	32738.7	102243	125702	114536	83201.2	61330.1	97402.4	25596.5	73146.3	40177.6	59375.1	121874	70111.7	72936.9	30248.8	85192.7	88300.3	82562.9	89998.8	44210.2	78053	19133.5	15874.4	17783	13238.9	14983.8	12041.3	14784.3	2243.45
M319T110_1			319.069	109.586			369619	1720.42	17532.3	17110.9	663.67	81329.3	161361	4471.35	3116.4	4123.17	2692.13	354.614	2951.53	1621.81	12012.4	6786.8	3404.08	11319.2	2384.19	7181.33	4412.96	202501	111457	193107	54082.3	206865	153602	67950.4	24998.1	8654.5	13555	18222.8	4744.59	14035	7956.45	3822.35	3852.81	3185.38	3279.57	679.454	2963.91	1312.87
M321T272			321.087	272.423			17166.6	36907.9	52586.8	59542.2	34260.4	40092.8	16614.4	28019.4	30454.6	37421.9	37833.7	43289.6	35403.8	6147.9	17929.8	14457.9	21510.2	21203.9	13083.1	17637	3829.32	1780.35	1256.42	1510.73	9945.51	5362.81	3971.16	3736.73	59281.4	85241.8	53932	69108.4	39428.8	61398.5	17108.8	28094.4	23979.2	27550.3	28378.4	24974.9	26595.5	1987.99
M323T372			323.22	371.604			15049.1	12366.4	10973.6	10880	8019.29	11457.7	2555.11	15294.5	22599.8	17008.6	17614.7	18796.7	18262.9	2733.99	19776.9	12724.2	29163.9	26451.4	34216.3	24466.6	8380.6	83562.3	82050.3	72518.1	80631.2	100677	83887.7	10310.4	150869	104331	132630	142481	165481	139158	22894.4	355640	251552	341314	233851	253180	287107	56759.6
M324T363			324.149	362.542			46295.8	52623.7	43036.5	43922.4	49168.5	47009.4	3937.16	5443.23	3421.13	3653.76	2393.74	3036.21	3589.61	1140.7	3765.4	2671.24	4013.83	24378.3	2508.83	7467.53	9476.32	24588.2	19242.9	24077.5	68763.5	11666.6	29667.7	22462.5	74882.1	72957	66028.1	59234.9	73314.4	69283.3	6570	31186	27306.2	20718.9	26312.7	22825.3	25669.8	4065.78
M328T318			328.341	318.047			4642.14	25924	13767.8	111339	151278	61390.4	65804.5	13663.6	6063.52	11360.5	7426.92	13843.7	10471.6	3572.51	16897.1	12232.2	24629.5	60394.4	3802.75	23591.2	21914.5	29315.4	8668.08	22369.8	23116	49221.2	26538.1	14753.5	44434.4	107705	238611	55199	22368.7	93663.5	86880.4	34724.1	85902.3	87614.9	18912.8	9987.64	47428.4	36985
M331T401_2			331.275	400.856			9098.52	9408.76	7473.41	10365	1563.85	7581.91	3521.79	9032.99	23409.6	11009.5	12156.4	16506.1	14422.9	5721.45	11195.3	7605.11	21880.9	20454.2	30612.5	18349.6	9136.54	50447.4	56490.6	46434.7	52578.8	55564.5	52303.2	4066.01	75975	63396.1	72359.3	77969.7	65587.6	71057.6	6369.28	112438	381060	105748	286448	437672	264673	151972
M341T320			341.353	320.473			9794.79	96332.3	18440.7	81502.1	179344	77082.7	68581.9	13702.5	6192.79	9835.26	8403.74	16191.4	10865.1	4042.58	17591.3	13856.6	29417.2	37014.2	9160.37	21407.9	11503.2	49248.3	16388.6	42005.8	38112.2	38729	36896.8	12289	26945.7	100806	109109	33377.6	50108.8	64069.5	38383.6	16959.4	40892.9	45440.3	11224	10626.9	25028.7	16818.1
M341T378			341.267	378.243			10501.8	18784.2	11885.6	12713.1	15439.8	13864.9	3287.66	12312.2	12871.8	11858.7	12232.3	24963.6	14847.7	5666.56	33975.5	32328.5	32779.6	36605.2	26492.2	32436.2	3715.17	13642.3	25319.7	16948.4	11672.8	173292	48175	70136.6	19665.8	18388.1	23122.4	19957.6	44565.8	25139.9	10998.3	123203	1.00186e+06	151539	146206	1.21461e+06	527484	535567
M344T199			344.064	199.08			5845.81	2889.95	4823.46	4404.89	3851.39	4363.1	1100.47	42422.7	31541.7	47600.4	25615.8	29903.4	35416.8	9205.96	62227.2	49012	42370.8	80068.3	16331.7	50002	23697.8	1125.85	1245.72	1040.04	2239.51	18209.4	4772.1	7527.18	80992.2	55035	74598.4	73291.7	22354.1	61254.3	23793.2	19368.6	21005.9	14330.4	22990.1	17834.7	19105.9	3285.86
M349T366			349.235	365.917			29530.3	36439.8	59746.2	51902.1	61710.6	47865.8	14281.6	2990.99	2340.6	2908.2	2047.3	3430.77	2743.57	549.485	1722.71	4343.28	1972.64	5965.75	1536.21	3108.12	1960.31	32527.4	19782.2	37544.3	26471.6	20915.4	27448.2	7584.98	8223.26	8371.28	6927.1	12520.3	7205.73	8649.54	2252.41	4708.82	5048.97	4302.53	4577.13	4920.7	4711.63	292.817
M351T411_1			351.25	411.44			56480.6	75196.6	52043	71207.1	56472.3	62279.9	10230.9	56735.3	159748	69761	71302.4	114507	94410.6	42525.9	47758.5	52771.6	137732	111832	156162	101251	49167.4	382918	484658	450501	573024	503256	478872	69829.6	632839	505722	547804	640569	633522	592091	61538.5	879744	87317.9	386483	124936	30093.9	301715	350820
M352T498			352.358	497.834			127639	29349	349728	496004	235277	247599	183242	245947	203597	24641.9	101442	312149	177555	114724	328163	106628	114264	2.04325e+06	11789.5	520820	858906	1517.98	1333.18	1109.44	1602.85	4203.06	1953.3	1271.85	1456.17	624.787	1395.27	1510.4	1859.88	1369.3	453.623	1087.05	1202.16	1664.71	264.066	613.294	966.256	542.157
M357T427			357.3	426.524			36638.9	41570.5	37874.4	44262.9	19404.4	35950.2	9729.2	56081.8	119654	83578.5	74524.4	94072	85582.1	23608.9	92161.6	60730.1	150557	207708	201419	142515	65208.8	87732.8	71245.9	83838.4	55742.3	45300.5	68772	18119.8	170779	134404	239965	103022	70553.7	143745	65367.4	587952	738501	928448	56128.4	26328.2	467471	407518
M379T206			379.079	206.343			7562.38	6072.93	6685.67	8070.34	5674.21	6813.11	1000.41	46640.6	42348.1	34489.4	38554.4	48213.4	42049.2	5668.57	20812.5	18677.8	28249.4	11140	15938.4	18963.6	6326.26	7822.77	4488.66	5760.23	8627.43	7749.68	6889.75	1708.11	21140.6	21470.6	20820.8	25117.6	17796	21269.1	2604.36	11404.7	10374.9	9272.8	10390.5	10374.7	10363.5	754.123
M379T427			379.282	427.411			39908.8	55976.7	50693.3	41940.4	24389.6	42581.8	12080.3	84275.6	147125	96696.5	95080.5	83269	101289	26338.2	138580	99313.8	196621	208850	268851	182443	65572.8	91297.2	61237.8	79409.5	17818.8	27694.7	55491.6	31933.6	156069	168224	250799	94263.9	51302.1	144132	76165.8	499007	112447	123308	104184	102819	188353	173853
M382T261			382.154	260.693			72276.1	54008.1	59648.1	68273	59355.1	62712.1	7396.13	77953.9	82785.8	84392.8	97693.4	102897	89144.7	10612.1	81239.6	48100.6	100994	77620.8	79868.8	77564.8	18946.5	462393	319383	373715	423225	450337	405811	59134.2	458134	445376	464019	442919	332371	428564	54482.3	347386	327705	304104	347100	338940	333047	18055.8
M385T220			385.177	220.211			37205.2	85461.3	89464.2	86557.9	88236.3	77385	22513.6	21387.1	22241.3	23997.3	21689.5	22903.8	22443.8	1043.02	16388	13612.6	21140	13148.1	13180.3	15493.8	3430.46	58464.9	46401.4	50167.4	43709.4	128862	65520.9	35843	142822	95762	139245	100065	109171	117413	22135.4	49166.7	40089	41695.7	47492.7	47414.1	45171.7	4009.09
M391T136			391.14	135.69			27325.8	9179.37	7705.28	6318.86	8257.69	11757.4	8764.51	70949.5	38122.8	50806.6	21861.2	57520.3	47852.1	18747.5	116561	108602	76893.4	54707.4	13552.6	74063.2	41961.7	255.416	4649.67	4517.49	17895.9	45490.7	14561.8	18517	114609	58539.5	85708.8	105804	30418.6	79015.9	34677.9	6567.51	6351.76	4859.46	6712.42	5614.2	6021.07	774.724
M393T432			393.261	431.519			182573	109270	101889	79111	123803	119329	38867.1	76126.6	15761.5	100616	59338.5	23864.5	55141.5	35549.2	258298	149422	85770.3	292956	26411.5	162572	112666	201163	31013.7	50201.4	11614.8	259069	110612	111831	27904.7	41743.1	114269	214174	295563	138731	114647	398616	80947.7	510948	49186.6	11783	210296	228008
M397T525			397.383	525.011			19686.7	673.802	883.742	985.181	1393.43	4724.58	8368.19	936.024	13398.3	1369.19	306.342	469217	97045.5	208122	732.186	776.362	677.37	478.765	1394.35	811.806	344.941	3212.97	3942.34	4716.2	1627	6402.39	3980.18	1770.33	1503.72	753.5	1994.07	869.623	1012.77	1226.74	515.458	748.846	413.336	1202.9	528.931	943.108	767.424	317.452
M435T462			435.272	462.054			84987.2	15568.7	24022.7	17143.4	49316.6	38207.7	29449.8	34225.4	6374.85	10238.4	19368.6	7591.12	15559.7	11609.2	68780.6	88684.9	43605.2	80649.8	4688.86	57281.9	33976.1	126416	5816.7	7146	6774.49	23334.4	33897.5	52228	3377.64	7716.3	9628.77	14190.2	31011.4	13184.9	10695	10302.8	723.877	2076.14	2124.24	834.57	3212.33	4018.59
M478T375			478.341	374.704			35734.7	19284.7	18695.4	26432.6	5594.29	21148.3	11091.7	47194.1	42212.7	37278.3	30215.5	38162.8	39012.7	6290.79	12540.3	11835.7	13279.7	13693.4	9681.61	12206.1	1580.08	79254.9	80086.7	78609.3	60347.2	13342.8	62328.2	28593.9	92216.5	93674.8	87701	85940.2	832.258	72072.9	39950.5	3055.85	1945.56	13128.9	1785.79	1989.74	4381.17	4915.95
M512T400			512.373	399.86			76766.6	97135.4	83317.6	128194	13418.3	79766.3	42043.3	75592.3	304648	58960.3	149420	185564	154837	98601.4	123204	47070.2	288890	249189	314678	204606	114729	275018	385553	412511	210205	184919	293641	102111	340244	317913	325164	170645	365020	303797	76586.3	506716	318484	273254	311921	308981	343871	92719.9
M560T377			560.387	377.243			28736	24692.9	27389.2	28848	26580	27249.2	1715.27	23067.9	20763.1	24913.4	24114.6	21805.7	22933	1681.95	6611.07	6860.91	8361.2	7649.24	6890.4	7274.56	721.124	126043	98061.4	104206	114913	15520.6	91748.9	43927.4	196925	115843	121710	118518	104243	131448	37191.7	14260.1	14615.3	12433.4	16448	5265.75	12604.5	4342.92
M569T395_2			569.489	395.471			51891.3	74643.1	49500.3	64249.7	55852.1	59227.3	10279.7	36805.5	57087.2	35043.3	45011.3	43162.9	43422	8707.94	27464.9	22880	58795.7	24816.4	174629	61717.3	64809.2	247673	373231	270426	682014	1.01026e+06	516722	325785	561569	298701	448369	821378	609151	547834	194123	158807	157046	78790.9	80652.9	212601	137580	57346.7
M628T444			627.558	444.1			109514	120907	56296.1	116514	124765	105599	28137.6	95727.7	63206.2	6966.14	39565.6	113965	63886.2	42876.7	34817.3	65917.5	172548	36702	178330	97663.1	72091.3	118814	381104	423079	79634.2	116309	223788	164177	382889	457218	211313	127274	360643	307868	134774	255477	552364	418543	507814	525768	451993	120800
M638T421			637.551	421.222			333492	512458	350870	538475	243542	395767	125548	613361	1.59819e+06	252202	1.13833e+06	1.21373e+06	963164	530226	638853	287449	1.46187e+06	404380	1.49592e+06	857694	581146	597992	803190	679665	1.08469e+06	1.23895e+06	880898	272168	932502	751078	1.03147e+06	904523	968654	917646	104518	2.08531e+06	1.31377e+06	1.84512e+06	1.89249e+06	1.58419e+06	1.74417e+06	299752
M640T457			639.567	456.828			110036	77861.6	70784.2	64612.9	38551.4	72369.3	25764.8	132358	111110	17658.9	330030	135973	145426	113843	50914	52302.4	419403	72384.9	174353	153871	156910	170154	177025	159384	149286	399570	211084	105894	146633	183225	37553.5	116240	196589	136048	63435.8	582904	470098	618133	396372	438645	501230	95155.5
M650T418_1			649.551	417.824			7.97944e+06	6.33299e+06	5.41468e+06	6.92621e+06	4.39344e+06	6.20935e+06	1.37763e+06	3.83092e+06	8.03417e+06	2.13548e+06	5.88254e+06	5.95363e+06	5.16735e+06	2.25425e+06	4.6986e+06	3.77427e+06	7.96609e+06	6.12327e+06	9.23836e+06	6.36012e+06	2.25648e+06	1.2474e+07	1.4658e+07	1.29545e+07	1.75689e+07	1.59979e+07	1.47307e+07	2.11623e+06	1.65219e+07	1.50652e+07	1.61923e+07	1.69138e+07	1.52787e+07	1.59944e+07	796621	1.35155e+07	1.28708e+07	9.43656e+06	8.58826e+06	1.0533e+07	1.09888e+07	2.13928e+06
M652T427			651.566	427.344			8.4871e+06	9.51758e+06	6.48449e+06	9.19467e+06	6.53105e+06	8.04298e+06	1.45025e+06	6.80747e+06	1.20689e+07	3.0147e+06	8.92766e+06	8.72085e+06	7.90792e+06	3.323e+06	5.80766e+06	5.36593e+06	9.07418e+06	8.72744e+06	1.06507e+07	7.92518e+06	2.25975e+06	1.58176e+07	1.88359e+07	1.60753e+07	1.50545e+07	1.50018e+07	1.6157e+07	1.56912e+06	1.7008e+07	1.42011e+07	1.75614e+07	1.5166e+07	1.51854e+07	1.58244e+07	1.40488e+06	1.62215e+07	2.55118e+06	6.21098e+06	5.47844e+06	2.90487e+06	6.67339e+06	5.5678e+06
M662T485			662.475	485.178			23021.2	5931.28	9651.86	5601.76	3180.41	9477.3	7916.95	13449.9	12886.6	20337.3	14843.2	8742.18	14051.8	4184.68	19178	11626.8	19496.6	31127.8	78873	32060.4	27081.5	103719	168756	118028	11336.7	35897.2	87547.4	63759.7	102497	200746	161876	18537.7	57390.2	108209	74329.2	658720	943976	773350	125460	187493	537800	363258
M665T438			664.57	438.428			35098.8	44350.2	35569.7	42618.9	46712.5	40870	5260.83	94219.9	113101	76898.6	97143.2	132369	102746	20957.9	88546.3	70163.7	117528	73114.7	40025.3	77875.7	28288.6	34484.8	31322.1	33560.2	40208.2	82987	44512.5	21756.1	74941.8	69768.8	113043	22725.9	41589.7	64413.9	34507.9	357262	591780	341023	243948	663716	439546	179000
M677T400_1			676.503	399.971			29209.1	41225.2	34944.2	61720.9	3454.43	34110.8	21080	23584.3	196218	22158.3	71634.5	97667.2	82252.5	71399.9	49640.6	12649.1	191987	150887	253316	131696	99624.2	341541	436449	446864	312402	342701	375992	61271.5	476625	416276	461152	303171	459903	423426	70881	426450	346584	560244	635959	8696.57	395587	243890
M678T458			677.582	457.991			3.83708e+06	2.50369e+06	2.12409e+06	2.78808e+06	2.1298e+06	2.67655e+06	705920	2.56904e+06	4.27977e+06	849478	2.65619e+06	2.52819e+06	2.57654e+06	1.21372e+06	4.03898e+06	1.9875e+06	4.20207e+06	4.55716e+06	4.05851e+06	3.76884e+06	1.01725e+06	1.01007e+07	1.38301e+07	1.17558e+07	1.18225e+07	8.55237e+06	1.12123e+07	1.98945e+06	1.71728e+07	1.78649e+07	1.41527e+07	1.31012e+07	1.29474e+07	1.50478e+07	2.31592e+06	2.53103e+07	1.70869e+07	1.21766e+07	4.12122e+06	1.25166e+07	1.42423e+07	7.75038e+06
M679T458			678.586	458.472			1.40703e+06	992112	851062	1.00322e+06	935951	1.03788e+06	214974	1.04313e+06	1.65401e+06	393887	620655	1.00842e+06	944021	480955	1.54293e+06	809786	1.70529e+06	1.79506e+06	1.47703e+06	1.46602e+06	388006	4.67696e+06	5.84998e+06	5.54006e+06	5.40603e+06	3.93871e+06	5.08235e+06	770677	7.67327e+06	8.25815e+06	6.41888e+06	6.12014e+06	6.13698e+06	6.92149e+06	982609	1.13023e+07	7.31447e+06	4.7988e+06	1.48475e+06	5.1151e+06	6.00308e+06	3.62131e+06
M692T461			691.598	460.558			81768.8	93227.2	81260.6	85761	51154.5	78634.4	16090.4	185872	351934	59840.8	313415	204577	223128	115258	117385	99993.9	324876	107899	298859	189802	111978	81512.7	142059	125710	201685	325622	175318	94410.2	137951	191751	167284	136841	221391	171044	36203.5	446569	270728	364476	212239	237625	306327	97325.4

## Sheet: Matrix model #2
Feature	Annotationa	Observed ion(s)	Mz med (Da)	RT med (s)	PLS-DA (Comp. 1)		Biofilm control							Biofilm Cu-1000							Biofilm Cu-1400							Planktonic control							Planktonic Cu-1000							Planktonic Cu-1400
					VIP number	VIP Score	Biofilm control - Replicate 1	Biofilm control - Replicate 2	Biofilm control - Replicate 3	Biofilm control - Replicate 4	Biofilm control - Replicate 5	Mean	SD	Biofilm Cu-1000 - Replicate 1	Biofilm Cu-1000 - Replicate 2	Biofilm Cu-1000 - Replicate 3	Biofilm Cu-1000 - Replicate 4	Biofilm Cu-1000 - Replicate 5	Mean	SD	Biofilm Cu-1400 - Replicate 1	Biofilm Cu-1400 - Replicate 2	Biofilm Cu-1400 - Replicate 3	Biofilm Cu-1400 - Replicate 4	Biofilm Cu-1400 - Replicate 5	Mean	SD	Planktonic control - Replicate 1	Planktonic control - Replicate 2	Planktonic control - Replicate 3	Planktonic control - Replicate 4	Planktonic control - Replicate 5	Mean	SD	Planktonic Cu-1000 - Replicate 1	Planktonic Cu-1000 - Replicate 2	Planktonic Cu-1000 - Replicate 3	Planktonic Cu-1000 - Replicate 4	Planktonic Cu-1000 - Replicate 5	Mean	SD	Planktonic Cu-1400 - Replicate 1	Planktonic Cu-1400 - Replicate 2	Planktonic Cu-1400 - Replicate 3	Planktonic Cu-1400 - Replicate 4	Planktonic Cu-1400 - Replicate 5	Mean	SD
M375T202			375.145	202.493	1	2.49	273174	46256.1	29550.8	29115.8	62574.5	88134.2	104357	206108	111318	350286	77886.2	137276	176575	107924	908501	1.62124e+06	636806	1.35159e+06	247990	953226	548731	34047.5	15999.5	17809.2	350154	556002	194802	246849	839956	606415	732886	678003	179015	607255	254130	68048.7	74980.3	45899.4	94784.2	59131.2	68568.7	18245.5
M287T204_1			287.101	203.512	2	2.19	740450	103866	211838	184189	261455	300360	252554	195069	130902	335962	118465	142006	184481	89570.5	530121	1.06636e+06	440302	878809	353452	653808	304926	476388	286154	338602	1.41182e+06	799613	662516	464077	262759	250658	230875	163326	94272.2	200378	70676.9	49575.7	96490.8	65553.5	121550	87476.4	84129.3	27853.8
M391T103			391.14	103.114	3	2.16	291055	73382.9	80554.7	67616.2	118245	126171	94267.6	613042	689560	924947	384946	722922	667083	195345	1.158e+06	1.06006e+06	1.00774e+06	888088	356064	893991	316077	40431.8	26949.6	27048.3	214018	545591	170808	223992	1.23605e+06	945925	1.09153e+06	1.40439e+06	435131	1.02261e+06	369824	60864.8	69237	41305.8	68352.7	49301.8	57812.4	12204.8
M229T74_1			229.059	73.988	4	2.06	313062	131588	100741	85502.5	137544	153688	91654	600066	554161	747068	571353	635907	621711	76621.1	965588	711087	797860	951286	534251	792014	179249	85992.7	39214.2	57036.2	163162	344836	138048	124933	1.5466e+06	1.52007e+06	1.66227e+06	1.87275e+06	928253	1.50599e+06	351626	618500	680881	539959	596760	490898	585399	73035.4
M285T123_2			285.085	122.636	5	1.88	232699	109084	185797	73168.6	139479	148045	62827.9	562481	588206	415918	422096	805144	558769	158640	302345	509490	309422	174628	139109	286999	145550	136067	68613.3	105815	136869	133624	116198	29571.3	172258	194597	144908	141497	70001	144652	47009.1	26764.3	18229.5	17179.1	29817.9	31478.8	24693.9	6611.35
M147T65			147.055	65.3955	6	1.76	60963.2	297130	26378.7	29827.9	34933.6	89846.6	116669	61612.8	46211.8	105963	62409.3	74761.5	70191.6	22414.6	142587	205909	312007	170869	305530	227380	77642.5	113044	59389.8	81561.1	141795	124340	104026	33232.2	720318	608583	729309	1.05089e+06	482272	718274	211240	200494	179662	161010	162683	157054	172180	18037.4
M347T360			347.219	360.486	7	1.72	168763	34761.8	216330	177622	202464	159988	72540	68089.2	65001.6	121257	67828.5	49071.8	74249.5	27424	91904	70403.8	53573.7	111980	29191.6	71410.7	32278.1	25187.8	40909.6	38370.9	32199.7	144972	56328	49924.4	449550	423874	236193	503138	407873	404125	100589	228094	122069	169461	92922.3	88226.8	140154	58836
M355T342			355.369	341.902	8	1.71	28331.4	167094	66104.9	1.01465e+06	2.10213e+06	675661	894281	141297	40333.9	70596.4	37194.9	57900.1	69464.6	42381.9	120638	129316	163449	319118	35764.3	153657	103748	154153	73037.7	113522	293122	230036	172774	88836.1	153313	323337	912015	376604	124007	377855	317474	170322	214583	342791	106296	59751.6	178749	109173
M290T280_2			290.093	280.214	9	1.7	889523	76291.5	384618	366717	347737	412977	294811	9388.78	9226.92	254697	100068	6292.1	75934.6	107549	94999.4	101870	54451.4	25225.5	8285.23	56966.4	41371.9	145031	225355	238809	586723	449217	329027	182753	2543.05	23336	3675.33	7028.7	35599.6	14436.5	14484.6	1682.18	1853.58	1280.91	1853.98	1243.03	1582.74	301.377
M120T297			120.045	297.339	10	1.66	43312	41408	27288.8	26106	39534.6	35529.9	8183.46	60840.7	53268	102510	68009.2	92653.8	75456.3	21148.5	77277.3	135736	78129.3	154333	44209.1	97936.9	45593.7	32820.8	51754.6	28513	72166	152855	67621.9	50689.5	839359	786168	732744	1.06588e+06	505433	785917	201701	265403	135046	147011	150680	157466	171121	53329.7
M385T345_2			385.379	345.145	11	1.61	207126	618381	451959	2.73458e+06	221958	846802	1.06904e+06	263540	66852.7	63635.1	92550.4	181812	133678	86954.2	217523	100385	208948	548523	163474	247771	174430	28246	15609.6	26499.4	700833	591174	272472	343217	138849	127255	613369	142289	57840.2	215920	224821	158495	229824	287127	116021	48551.4	168004	93639.6
M688T491	PE (C16:1, C16:1)	[M+H]+	688.491	490.647	12	1.6	109284	54348.8	68031.6	50825.3	21841.8	60866.4	31866.3	141570	244651	134820	153157	110129	156865	51537	159912	92053.7	281425	277860	580792	278409	187226	610499	756.916	1.04605e+06	184583	217375	411854	418373	1.17193e+06	1.38685e+06	1.28155e+06	217311	437984	899125	532932	2.98751e+06	3.68569e+06	3.14559e+06	3.75874e+06	2.58396e+06	3.2323e+06	492567
M413T106			413.122	105.61	13	1.57	54034.9	18742.3	14988.4	17345.3	27666.2	26555.4	16093.7	219643	140831	205354	87849.5	161934	163122	52778.7	267961	262639	170130	199450	70995.4	194235	80484.3	5848.03	4973.21	5272.46	31024.9	69176.3	23259	27972	157802	113168	135006	173402	54013.3	126678	46593.6	8043.04	11890.4	6817.13	9510.44	7267.49	8705.71	2053.31
M327T318			327.337	317.938	14	1.55	21742.8	117450	61368.8	463723	602279	253313	262191	55973.5	27668.3	50963.5	32168.2	65655.6	46485.8	16098.4	82916	54937.7	103133	256906	18279.4	103234	91621	130238	38162	96428.9	106758	227034	119724	68900.6	201098	461265	936019	243678	99224.7	388257	333483	154230	376218	365686	83337.2	44452.7	204785	156756
M531T508			531.408	507.516	15	1.54	8172.73	11568	18644	36064.8	12796.7	17449.2	11070.9	27304.1	19984.6	7061.73	19429.5	19137.2	18583.4	7276.44	2821.56	10307.7	13406.7	46938.7	4934.74	15681.9	17971.8	964878	678258	1.01352e+06	9142.83	20198.3	537199	493918	4595.72	10009.1	36007.3	6081.49	99791.7	31297.1	40359.8	5716.29	7104.21	8933.95	2355.52	3138.23	5449.64	2732.46
M287T155			287.101	154.631	16	1.52	74044.8	13774.2	29010.5	24584.6	32199.9	34722.8	23058.8	27461.4	17255	42552.7	14017.4	15857	23428.7	11895.5	69472.5	223968	46324	117098	38679.2	99108.3	76206.3	65442	81972.3	53558.2	214913	149269	113031	67932.8	41928.1	40404.9	28486.1	23664.5	18534	30603.5	10278.9	10226	11704.3	9350.59	16139.9	14135.7	12311.3	2804.88
M703T505	PE (C17:1, C16:0)	[M+H]+	702.507	505.135	17	1.52	5252.13	5778.79	4958.46	5288.34	2486.73	4752.89	1300.59	15659.2	30405.5	13763.4	17347	17778.5	18990.7	6574.42	15994.3	9849.48	23483.3	9639	78364.7	27466.2	29009.8	15618.2	32340.7	22038.3	5010.02	12616.3	17524.7	10298.4	265.382	51897.8	42780.5	5604.96	11321.1	22373.9	23346.5	462868	800033	470072	753461	1.15492e+06	728270	285007
M347T114			347.107	114.164	18	1.51	18275.8	31983.9	23209.9	30095	28824	26477.7	5631.57	77823.9	78755.7	84891.3	82142.3	104968	85716.2	11122.3	30514.7	20641.6	59779.7	15682.4	33440.7	32011.8	17111.9	29336.7	25613.9	27567.6	21716.3	39881.9	28823.3	6799.66	33989.9	33488.9	35081.2	36364.5	28161.3	33417.2	3138.98	28965.5	29373.4	26844.7	31048.4	29913.7	29229.2	1545.5
M223T62			223.07	61.643	19	1.49	4307.79	6551.64	5252.94	7518.12	6174.5	5961	1230.19	73797.3	53177.3	88692.7	54486.8	59831.1	65997	15089.6	142280	125903	108392	177143	73510.1	125445	38549.7	1621.13	2897.26	2217.54	6356.29	3541.69	3326.78	1840.4	29686.9	26557.2	29278.5	15035.5	12869.3	22685.5	8098.73	7542.25	10974.3	6114.25	14646	10591.7	9973.71	3317.43
M233T51_2			233.129	50.915	20	1.44	48926.9	3220.01	32979.7	26121.4	13973.9	25044.4	17559.6	5617.86	1644.94	5491.46	3790.1	2688.07	3846.49	1734.62	13543.3	20426.3	5565.59	27830.6	645.273	13602.2	10971.4	221899	164624	234145	144725	196197	192318	37655.1	27302.9	19426.4	25566.6	21529.5	4535.57	19672.2	9022.19	6634.4	7650.48	5358.53	7682.91	5677.71	6600.81	1080.42
M147T74			147.055	74.3615	21	1.43	35246.1	30192.6	14995.2	12240.3	16347.7	21804.4	10230.5	98380.5	63988.9	93854.2	69273.2	77690.5	80637.5	15037.5	136135	114915	105766	127847	77680.7	112469	22681	20512.3	19040	17221.5	28625.2	48298.4	26739.5	12816	262499	237336	286438	325994	199519	262357	47969.6	77866.8	73920	67969.6	74815.6	68506.4	72615.7	4259.91
M233T133			233.093	132.963	22	1.41	156489	18008.7	35928.1	34260.6	44189	57775.1	55992.5	46339.3	26910	43135.8	30124.3	21276.5	33557.2	10746.1	110049	246173	84758.7	111189	60581.8	122550	72173.8	22851.1	35138.9	27064.8	79568.2	90726.2	51069.9	31666.7	69095.3	66811.9	65110.7	66728.8	31428.6	59835	15942.9	21274.1	20607.4	22591	23961.2	21756.3	22038	1295.56
M369T344			369.384	344.204	23	1.38	10802.2	171454	23917.8	192657	777298	235226	314141	28066	9225.5	15840.1	12692.6	16924.5	16549.7	7102.63	23389.2	28285.7	51176.2	51433.2	18352	34527.3	15713.4	78082	34120.6	65898.1	67909.7	43219.2	57845.9	18387.8	22026.5	77321	109863	52502.4	71016.2	66545.8	32371.5	24213.9	30636.4	62582	17359.8	14592.1	29876.8	19316.9
M132T42			132.077	42.3645	24	1.37	91070.2	192921	304326	289266	321556	239828	96970.2	106992	108060	172008	145191	141629	134776	27510.4	129666	207221	233580	283624	475373	265893	129654	643857	578470	438749	382.263	835133	499318	313263	823005	911413	996419	842697	917546	898216	68794.3	1.45477e+06	1.03645e+06	1.29722e+06	1.24294e+06	1.35065e+06	1.27641e+06	155288
M678T434_1	OL (C18:1, C18:1)	[M+H]+	677.582	434.179	25	1.36	1.87505e+07	1.03942e+07	1.16734e+07	1.17678e+07	8.70988e+06	1.22591e+07	3.83396e+06	9.39994e+06	1.60195e+07	2.55019e+06	1.48292e+07	1.15304e+07	1.08658e+07	5.33874e+06	1.19175e+07	9.43368e+06	1.90616e+07	1.51811e+07	1.94867e+07	1.50161e+07	4.3916e+06	1.62574e+07	2.15459e+07	1.68014e+07	2.09449e+07	2.34074e+07	1.97914e+07	3.11904e+06	2.01286e+07	1.65274e+07	1.31235e+07	2.54713e+07	2.15202e+07	1.93542e+07	4.73081e+06	1.04041e+07	4.13669e+06	7.19516e+06	6.8635e+06	3.37721e+06	6.39533e+06	2.79015e+06
M284T452			284.295	451.966	26	1.36	202295	288106	222559	194573	18450.8	185197	100213	182991	220997	3485.25	115738	333678	171378	122701	177283	3649.62	7944.15	84872.4	4874.07	55724.6	76168.5	22022.2	13090.8	21230	16498.1	3777.55	15323.7	7406.65	3966.75	3518.84	7231.35	3857.4	15472.2	6809.32	5070.64	3109.82	827.535	1869.93	1416.72	681.429	1581.09	977.841
M598T409_1	OL (C14:0, C16:0)	[M+H]+	597.52	408.641	27	1.36	701820	779516	444232	719424	614630	651924	130243	303613	677940	98224.3	583940	513527	435449	233479	284731	180859	820108	266177	1.05063e+06	520501	389367	2.88236e+06	3.61558e+06	2.58922e+06	4.34134e+06	4.53879e+06	3.59346e+06	861340	4.0701e+06	2.95318e+06	3.5561e+06	4.19298e+06	4.00972e+06	3.75642e+06	509527	1.77769e+06	1.53423e+06	1.64329e+06	1.32767e+06	1.73789e+06	1.60415e+06	180877
M622T404_1	OL (C16:1, C16:1)	[M+H]+	621.52	404.318	28	1.34	652242	553255	408520	585273	433057	526469	103238	235004	556957	264600	440437	304487	360297	135156	249733	191726	668954	294116	1.26339e+06	533584	448812	2.41325e+06	3.11114e+06	1.92598e+06	5.44104e+06	4.85839e+06	3.54996e+06	1.5338e+06	3.75607e+06	2.75567e+06	3.56572e+06	4.29473e+06	3.95118e+06	3.66467e+06	575216	1.07259e+06	2.04326e+06	895907	878899	1.05984e+06	1.1901e+06	485296
M351T411_2			351.33	410.545	29	1.32	91851.1	28821.8	70309.6	239.812	32058	44656.1	36289.5	50128.4	1201.27	140422	99971.2	279615	114268	106214	1006.28	1613.69	1174.88	1578.41	884.207	1251.5	331.27	1386.38	3197.78	3486.53	799462	2625.14	162032	356336	687.74	772288	1098.59	1564.41	1799.49	155488	344802	4033.66	5993.37	5539.03	4651.79	6850.79	5413.73	1107.02
M413T301_1	LOL (C18:1)	[M+H]+	413.337	300.854	30	1.32	454010	481112	731471	772071	651542	618041	144369	482706	515074	628708	539226	523818	537906	54803.1	603071	401505	597619	539173	866071	601488	168744	3.35574e+06	2.44004e+06	2.61825e+06	4.03287e+06	2.3938e+06	2.96814e+06	709762	2.61432e+06	3.42971e+06	2.86692e+06	3.33281e+06	1.74134e+06	2.79702e+06	678247	852222	597693	398169	1.05601e+06	604630	701746	255229
M664T440	OL (C18:1, C17:1)	[M+H]+	663.567	439.922	31	1.32	73072.4	85870.6	21486.1	81661.1	87855.1	69989	27702.4	196324	217715	50090.2	178645	266239	181803	80604.3	178307	137947	68048.4	107824	86270.2	115679	43627.4	67897.4	67268	77734.6	87914.9	55007	71164.4	12355.8	151427	154589	223505	139672	90836.7	152006	47468	260777	1.05678e+06	571432	388099	1.18301e+06	692020	408351
M664T424			663.566	424.209	32	1.32	307755	352290	250792	397565	190772	299835	81647.7	568974	1.42233e+06	259151	888343	999500	827660	440729	513689	313725	1.26984e+06	428335	1.28606e+06	762331	476048	469614	568327	503882	1.005e+06	899899	689343	245607	870442	737014	933738	738327	695974	795099	101636	1.95674e+06	2.02176e+06	1.67185e+06	1.57654e+06	1.37358e+06	1.72009e+06	269265
M325T412	OL (C16:0, C16:0)	[M+H]+	325.274	412.301	33	1.3	4838.72	8020.36	8807.02	5859.28	59471.2	17399.3	23573.1	7290.35	15921.4	8002.4	9451.27	15855.3	11304.1	4256.67	27944.2	22039.3	12527.2	10077	13137.1	17145	7548.51	8812.56	4891.87	7514.36	3621.58	7263.83	6420.84	2109.52	11150.4	7832.2	12304.7	4711.67	6642.71	8528.35	3152.13	103559	758696	201686	353165	566629	396747	267290
M679T458			678.586	458.472	34	1.29	1.40703e+06	992112	851062	1.00322e+06	935951	1.03788e+06	214974	1.04313e+06	1.65401e+06	393887	620655	1.00842e+06	944021	480955	1.54293e+06	809786	1.70529e+06	1.79506e+06	1.47703e+06	1.46602e+06	388006	4.67696e+06	5.84998e+06	5.54006e+06	5.40603e+06	3.93871e+06	5.08235e+06	770677	7.67327e+06	8.25815e+06	6.41888e+06	6.12014e+06	6.13698e+06	6.92149e+06	982609	1.13023e+07	7.31447e+06	4.7988e+06	1.48475e+06	5.1151e+06	6.00308e+06	3.62131e+06
M311T400_1			311.258	399.826	35	1.29	124673	148652	127398	165208	84780.5	130142	30279.2	117750	328540	152055	162529	246546	201484	85360.8	143624	140665	342339	292604	442541	272355	130561	1.1603e+06	1.08965e+06	1.01625e+06	1.57103e+06	1.17935e+06	1.20332e+06	215379	2.15357e+06	1.42235e+06	2.03944e+06	2.16159e+06	1.4935e+06	1.85409e+06	365728	3.6492e+06	713277	3.41977e+06	225063	282615	1.65798e+06	1.72527e+06
M596T400	OL (C14:0, C16:1)	[M+H]+	595.504	399.599	36	1.28	271219	313074	229405	304263	290984	281789	33257.3	198177	293049	184966	253114	2473.88	186356	111573	134665	140908	325284	126547	844217	314324	307619	1.08294e+06	1.4299e+06	965994	3.09909e+06	3.52969e+06	2.02152e+06	1.20217e+06	2.05931e+06	1.16263e+06	1.50151e+06	2.81269e+06	2.23673e+06	1.95457e+06	644083	519022	979725	413647	472319	992889	675520	286192
M231T200			231.077	199.986	37	1.27	2280.23	1923.31	1724.65	1758.5	4045.15	2346.37	974.851	19079	18734.4	25369.9	15056.7	42412.3	24130.4	10871.2	21290.7	22829.3	26539.3	41793.2	12710.4	25032.6	10652.3	2568.8	2284.17	2618.78	4114.25	3347.17	2986.63	742.441	166823	150916	160396	217728	95417.8	158256	43638.8	38804.6	35354.4	31059.1	33111.7	30412.5	33748.5	3424.54
M287T113			287.101	113.178	38	1.27	54102.3	7591.85	21647.2	19434.2	15085.4	23572.2	17890.7	21140.6	10655	22394	8194.77	8738.14	14224.5	6960.11	34279.4	231529	26603.8	58337	19480.2	74045.8	89242.8	61009.8	38736	39124.4	164811	98306.3	80397.4	53059.7	30122.8	27629.3	27265.1	21112.6	13803.9	23986.8	6588.2	7109.09	11577.7	7473.63	12103.7	8464.74	9345.77	2338.35
M665T438			664.57	438.428	39	1.26	35098.8	44350.2	35569.7	42618.9	46712.5	40870	5260.83	94219.9	113101	76898.6	97143.2	132369	102746	20957.9	88546.3	70163.7	117528	73114.7	40025.3	77875.7	28288.6	34484.8	31322.1	33560.2	40208.2	82987	44512.5	21756.1	74941.8	69768.8	113043	22725.9	41589.7	64413.9	34507.9	357262	591780	341023	243948	663716	439546	179000
M676T498	PE (C16:1, C15:0)	[M+H]+	676.491	498.119	40	1.26	5953.72	2780.92	2286.83	2888.65	1405.03	3063.03	1718.83	4669.06	5607.23	6858.62	4968.65	5310.34	5482.78	846.261	8596.45	3753.71	6533.16	9120.85	35038.2	12608.5	12714.8	14311.9	18318.4	13613.3	3595.22	7103.74	11388.5	5929.05	12308.1	24775.4	17853.5	3597.4	4769.23	12660.7	8920.13	218112	350968	209513	332498	427790	307776	92972.1
M132T62			132.044	62.074	41	1.26	346396	11550.1	71340.8	74542.3	41724	109111	135078	37013.5	17516.3	19743.7	12111	34644.8	24205.9	10999.5	59823.5	37960.2	16080	66080	5481.15	37085	26450.6	317879	157162	261639	149516	238063	224852	71483.1	59242.4	37140.4	65358.2	76128.5	6414.68	48856.8	27670	15636.2	31788.9	17429.2	16547	13704.8	19021.2	7269.68
M678T458			677.582	457.991	42	1.25	3.83708e+06	2.50369e+06	2.12409e+06	2.78808e+06	2.1298e+06	2.67655e+06	705920	2.56904e+06	4.27977e+06	849478	2.65619e+06	2.52819e+06	2.57654e+06	1.21372e+06	4.03898e+06	1.9875e+06	4.20207e+06	4.55716e+06	4.05851e+06	3.76884e+06	1.01725e+06	1.01007e+07	1.38301e+07	1.17558e+07	1.18225e+07	8.55237e+06	1.12123e+07	1.98945e+06	1.71728e+07	1.78649e+07	1.41527e+07	1.31012e+07	1.29474e+07	1.50478e+07	2.31592e+06	2.53103e+07	1.70869e+07	1.21766e+07	4.12122e+06	1.25166e+07	1.42423e+07	7.75038e+06
M123T46			123.055	45.958	43	1.25	31589.5	12562.7	12495.6	13053.7	18012.5	17542.8	8184.71	42126.1	21663.3	16198.9	28305.9	23448.2	26348.5	9825.24	22065.2	14524.8	15330.9	20318.4	29073.8	20262.6	5876.5	408209	179148	369981	33487.6	78965.3	213958	168879	29666.8	33728	34924.6	32434.8	29136.7	31978.2	2518.34	66079.1	83853.8	73982.8	82988.8	78175.5	77016	7290.25
M393T432			393.261	431.519	44	1.23	182573	109270	101889	79111	123803	119329	38867.1	76126.6	15761.5	100616	59338.5	23864.5	55141.5	35549.2	258298	149422	85770.3	292956	26411.5	162572	112666	201163	31013.7	50201.4	11614.8	259069	110612	111831	27904.7	41743.1	114269	214174	295563	138731	114647	398616	80947.7	510948	49186.6	11783	210296	228008
M301T219			301.116	219.069	45	1.23	33287.7	5981.94	11918.1	9652.5	13963.7	14960.8	10664.5	11604	7650.26	20191.2	6730.31	11400.1	11515.2	5318.05	35330.7	92788.8	25689.9	68280.9	16422	47702.5	31907.4	166019	77750	73828.6	409849	188949	183279	136729	101997	102932	88642.1	107698	40314.9	88317	27752	24819.2	24118.7	21355.5	25379.2	25529.5	24240.4	1705.22
M341T378			341.267	378.243	46	1.23	10501.8	18784.2	11885.6	12713.1	15439.8	13864.9	3287.66	12312.2	12871.8	11858.7	12232.3	24963.6	14847.7	5666.56	33975.5	32328.5	32779.6	36605.2	26492.2	32436.2	3715.17	13642.3	25319.7	16948.4	11672.8	173292	48175	70136.6	19665.8	18388.1	23122.4	19957.6	44565.8	25139.9	10998.3	123203	1.00186e+06	151539	146206	1.21461e+06	527484	535567
M626T424_1			625.551	423.842	47	1.22	3.13817e+06	3.99985e+06	2.80021e+06	3.66253e+06	1.95183e+06	3.11052e+06	796122	2.06498e+06	2.51378e+06	803837	2.87748e+06	2.98334e+06	2.24868e+06	884126	1.88503e+06	1.28785e+06	3.30114e+06	1.75075e+06	3.18296e+06	2.28155e+06	905332	7.36656e+06	9.19438e+06	7.81394e+06	7.93477e+06	7.87681e+06	8.03729e+06	684635	6.02383e+06	5.2687e+06	4.98048e+06	6.90415e+06	7.66775e+06	6.16898e+06	1.12148e+06	4.18596e+06	1.99235e+06	2.93061e+06	1.95798e+06	998855	2.41315e+06	1.20365e+06
M638T421			637.551	421.222	48	1.22	333492	512458	350870	538475	243542	395767	125548	613361	1.59819e+06	252202	1.13833e+06	1.21373e+06	963164	530226	638853	287449	1.46187e+06	404380	1.49592e+06	857694	581146	597992	803190	679665	1.08469e+06	1.23895e+06	880898	272168	932502	751078	1.03147e+06	904523	968654	917646	104518	2.08531e+06	1.31377e+06	1.84512e+06	1.89249e+06	1.58419e+06	1.74417e+06	299752
M171T181			171.15	181.448	49	1.21	2059.21	2311.74	1665.11	3138.67	2543.37	2343.62	550.972	1761.22	1463.83	1832.36	1044.93	2795.31	1779.53	646.964	35992	33769.1	20374.3	28196.5	23551.4	28376.7	6603.5	3807.28	2875.72	3923.37	4295.84	2541.88	3488.82	743.997	4608.37	3964.17	8038.75	4837.93	3617.69	5013.38	1760.43	2818.27	2984.13	2068.3	3054.36	2847.11	2754.43	395.652
M379T427			379.282	427.411	50	1.2	39908.8	55976.7	50693.3	41940.4	24389.6	42581.8	12080.3	84275.6	147125	96696.5	95080.5	83269	101289	26338.2	138580	99313.8	196621	208850	268851	182443	65572.8	91297.2	61237.8	79409.5	17818.8	27694.7	55491.6	31933.6	156069	168224	250799	94263.9	51302.1	144132	76165.8	499007	112447	123308	104184	102819	188353	173853
M329T401_1	MAG (C16:1)	[M+H]+	329.269	400.812	51	1.2	297473	365353	317320	414495	153025	309533	98531.4	290890	765656	369624	406365	528565	472220	185083	368276	226645	755525	677575	995490	604702	308057	1.63878e+06	1.70787e+06	1.50262e+06	1.76865e+06	1.65106e+06	1.6538e+06	98998.1	2.41578e+06	1.93274e+06	2.26746e+06	2.34731e+06	2.03503e+06	2.19966e+06	207034	3.49914e+06	536204	3.2992e+06	134275	174943	1.52875e+06	1.71606e+06
M237T244			237.103	243.597	52	1.19	1739.01	1723.7	1599.06	1910.77	2841.23	1962.75	503.465	1377.25	936.852	4141.16	2643.17	1616.47	2142.98	1280.74	11888.5	12889.3	29415.6	19077	26354.5	19925	7845.62	3237.89	2985.16	4558.57	6221.55	5090.76	4418.78	1338.92	128409	176154	114660	158862	114604	138538	27720.3	70731.8	56185.3	52731	62128	51106.9	58576.6	8000.71
M319T110_1			319.069	109.586	53	1.19	369619	1720.42	17532.3	17110.9	663.67	81329.3	161361	4471.35	3116.4	4123.17	2692.13	354.614	2951.53	1621.81	12012.4	6786.8	3404.08	11319.2	2384.19	7181.33	4412.96	202501	111457	193107	54082.3	206865	153602	67950.4	24998.1	8654.5	13555	18222.8	4744.59	14035	7956.45	3822.35	3852.81	3185.38	3279.57	679.454	2963.91	1312.87
M297T383			297.242	383.217	54	1.19	19583.9	30491	17035.9	18586.6	20032	21145.9	5349.14	16851.1	15656.7	16483.6	14727.6	22197.9	17183.4	2920.06	13821	16115.7	13121.5	15772.7	17659	15298	1829.43	73577.5	38317.1	68037.7	34326.5	41767.5	51205.3	18192.8	25978.5	21658	31778	28239.1	33682	28267.1	4758.32	71259.5	812548	78458.2	512260	811753	457256	369935
M321T272			321.087	272.423	55	1.18	17166.6	36907.9	52586.8	59542.2	34260.4	40092.8	16614.4	28019.4	30454.6	37421.9	37833.7	43289.6	35403.8	6147.9	17929.8	14457.9	21510.2	21203.9	13083.1	17637	3829.32	1780.35	1256.42	1510.73	9945.51	5362.81	3971.16	3736.73	59281.4	85241.8	53932	69108.4	39428.8	61398.5	17108.8	28094.4	23979.2	27550.3	28378.4	24974.9	26595.5	1987.99
M385T220			385.177	220.211	56	1.18	37205.2	85461.3	89464.2	86557.9	88236.3	77385	22513.6	21387.1	22241.3	23997.3	21689.5	22903.8	22443.8	1043.02	16388	13612.6	21140	13148.1	13180.3	15493.8	3430.46	58464.9	46401.4	50167.4	43709.4	128862	65520.9	35843	142822	95762	139245	100065	109171	117413	22135.4	49166.7	40089	41695.7	47492.7	47414.1	45171.7	4009.09
M352T498			352.358	497.834	57	1.17	127639	29349	349728	496004	235277	247599	183242	245947	203597	24641.9	101442	312149	177555	114724	328163	106628	114264	2.04325e+06	11789.5	520820	858906	1517.98	1333.18	1109.44	1602.85	4203.06	1953.3	1271.85	1456.17	624.787	1395.27	1510.4	1859.88	1369.3	453.623	1087.05	1202.16	1664.71	264.066	613.294	966.256	542.157
M628T444			627.558	444.1	58	1.17	109514	120907	56296.1	116514	124765	105599	28137.6	95727.7	63206.2	6966.14	39565.6	113965	63886.2	42876.7	34817.3	65917.5	172548	36702	178330	97663.1	72091.3	118814	381104	423079	79634.2	116309	223788	164177	382889	457218	211313	127274	360643	307868	134774	255477	552364	418543	507814	525768	451993	120800
M662T485			662.475	485.178	59	1.16	23021.2	5931.28	9651.86	5601.76	3180.41	9477.3	7916.95	13449.9	12886.6	20337.3	14843.2	8742.18	14051.8	4184.68	19178	11626.8	19496.6	31127.8	78873	32060.4	27081.5	103719	168756	118028	11336.7	35897.2	87547.4	63759.7	102497	200746	161876	18537.7	57390.2	108209	74329.2	658720	943976	773350	125460	187493	537800	363258
M324T363			324.149	362.542	60	1.16	46295.8	52623.7	43036.5	43922.4	49168.5	47009.4	3937.16	5443.23	3421.13	3653.76	2393.74	3036.21	3589.61	1140.7	3765.4	2671.24	4013.83	24378.3	2508.83	7467.53	9476.32	24588.2	19242.9	24077.5	68763.5	11666.6	29667.7	22462.5	74882.1	72957	66028.1	59234.9	73314.4	69283.3	6570	31186	27306.2	20718.9	26312.7	22825.3	25669.8	4065.78
M267T293			267.075	293.298	61	1.16	21324.8	11741.9	17050.8	13329.9	10523.2	14794.1	4400.07	65071.1	50630.5	91822.8	64058.9	59408.6	66198.4	15418.5	58724.5	96453.5	53033.9	73875.8	41962.6	64810	21102.2	6375.6	13139.2	7253.2	27886.6	26476.7	16226.3	10345.5	81388.7	86413.7	68881.3	94211.8	86296.1	83438.3	9343.39	17764.6	11941	12018.5	16997.6	14282.4	14600.8	2720.23
M301T116_2			301.126	116.046	62	1.15	14727.4	465.037	17303.1	16553.8	17210.5	13252	7222.64	16405.6	14728.4	15781.2	16401.5	15294.7	15722.3	724.986	15823.2	910.855	16884.7	14839.9	14399	12571.5	6588.5	281815	178099	222833	272293	218474	234703	42546.7	159125	143597	167784	146641	145731	152575	10451	193080	195070	153078	227057	201987	194054	26613.8
M317T115			317.111	114.651	63	1.15	88822	37895.7	32090.4	32821.9	58946.5	50115.3	24235.7	132094	116967	147903	63950.5	134683	119120	32738.7	102243	125702	114536	83201.2	61330.1	97402.4	25596.5	73146.3	40177.6	59375.1	121874	70111.7	72936.9	30248.8	85192.7	88300.3	82562.9	89998.8	44210.2	78053	19133.5	15874.4	17783	13238.9	14983.8	12041.3	14784.3	2243.45
M379T206			379.079	206.343	64	1.15	7562.38	6072.93	6685.67	8070.34	5674.21	6813.11	1000.41	46640.6	42348.1	34489.4	38554.4	48213.4	42049.2	5668.57	20812.5	18677.8	28249.4	11140	15938.4	18963.6	6326.26	7822.77	4488.66	5760.23	8627.43	7749.68	6889.75	1708.11	21140.6	21470.6	20820.8	25117.6	17796	21269.1	2604.36	11404.7	10374.9	9272.8	10390.5	10374.7	10363.5	754.123
M569T395_2			569.489	395.471	65	1.13	51891.3	74643.1	49500.3	64249.7	55852.1	59227.3	10279.7	36805.5	57087.2	35043.3	45011.3	43162.9	43422	8707.94	27464.9	22880	58795.7	24816.4	174629	61717.3	64809.2	247673	373231	270426	682014	1.01026e+06	516722	325785	561569	298701	448369	821378	609151	547834	194123	158807	157046	78790.9	80652.9	212601	137580	57346.7
M382T261			382.154	260.693	66	1.13	72276.1	54008.1	59648.1	68273	59355.1	62712.1	7396.13	77953.9	82785.8	84392.8	97693.4	102897	89144.7	10612.1	81239.6	48100.6	100994	77620.8	79868.8	77564.8	18946.5	462393	319383	373715	423225	450337	405811	59134.2	458134	445376	464019	442919	332371	428564	54482.3	347386	327705	304104	347100	338940	333047	18055.8
M351T411_1			351.25	411.44	67	1.12	56480.6	75196.6	52043	71207.1	56472.3	62279.9	10230.9	56735.3	159748	69761	71302.4	114507	94410.6	42525.9	47758.5	52771.6	137732	111832	156162	101251	49167.4	382918	484658	450501	573024	503256	478872	69829.6	632839	505722	547804	640569	633522	592091	61538.5	879744	87317.9	386483	124936	30093.9	301715	350820
M640T457			639.567	456.828	68	1.12	110036	77861.6	70784.2	64612.9	38551.4	72369.3	25764.8	132358	111110	17658.9	330030	135973	145426	113843	50914	52302.4	419403	72384.9	174353	153871	156910	170154	177025	159384	149286	399570	211084	105894	146633	183225	37553.5	116240	196589	136048	63435.8	582904	470098	618133	396372	438645	501230	95155.5
M285T202			285.122	202.002	69	1.12	4358.79	873.248	2162.95	2922.41	6442.78	3352.04	2139.46	3528.46	2989.78	5284.31	3921.16	3378.55	3820.45	883.683	9393.39	8432.55	13826.8	11292.5	5961.86	9781.43	2966.8	5916.37	6376.77	4974.75	19469.7	15172.3	10382	6533.68	112693	179205	108191	177132	109539	137352	37303.1	71782	55834.9	52273.2	45651.1	38499.9	52808.2	12504
M692T461			691.598	460.558	70	1.09	81768.8	93227.2	81260.6	85761	51154.5	78634.4	16090.4	185872	351934	59840.8	313415	204577	223128	115258	117385	99993.9	324876	107899	298859	189802	111978	81512.7	142059	125710	201685	325622	175318	94410.2	137951	191751	167284	136841	221391	171044	36203.5	446569	270728	364476	212239	237625	306327	97325.4
M677T400_1			676.503	399.971	71	1.09	29209.1	41225.2	34944.2	61720.9	3454.43	34110.8	21080	23584.3	196218	22158.3	71634.5	97667.2	82252.5	71399.9	49640.6	12649.1	191987	150887	253316	131696	99624.2	341541	436449	446864	312402	342701	375992	61271.5	476625	416276	461152	303171	459903	423426	70881	426450	346584	560244	635959	8696.57	395587	243890
M239T289			239.119	289.284	72	1.09	4322.36	2990.91	2283.58	350.088	2173.08	2424	1441.26	4342.73	3849.66	476.588	5550.84	498.074	2943.58	2326.1	3899.07	3392.97	6024.16	9803.78	3132.79	5250.55	2788.03	3326.36	3003.66	2611.06	10684.8	5844.37	5094.05	3371.92	150534	96466	125748	187763	38530.4	119808	56453.8	85321.1	57464.1	60128.4	62622.4	56237.9	64354.8	11977.2
M328T318			328.341	318.047	73	1.08	4642.14	25924	13767.8	111339	151278	61390.4	65804.5	13663.6	6063.52	11360.5	7426.92	13843.7	10471.6	3572.51	16897.1	12232.2	24629.5	60394.4	3802.75	23591.2	21914.5	29315.4	8668.08	22369.8	23116	49221.2	26538.1	14753.5	44434.4	107705	238611	55199	22368.7	93663.5	86880.4	34724.1	85902.3	87614.9	18912.8	9987.64	47428.4	36985
M357T427			357.3	426.524	74	1.08	36638.9	41570.5	37874.4	44262.9	19404.4	35950.2	9729.2	56081.8	119654	83578.5	74524.4	94072	85582.1	23608.9	92161.6	60730.1	150557	207708	201419	142515	65208.8	87732.8	71245.9	83838.4	55742.3	45300.5	68772	18119.8	170779	134404	239965	103022	70553.7	143745	65367.4	587952	738501	928448	56128.4	26328.2	467471	407518
M301T97			301.126	97.377	75	1.07	84070.3	104474	119308	132809	95600.1	107252	19231.4	76683.4	86397.1	99665.2	77175	94610.5	86906.2	10266.6	111689	88423.1	141502	117062	96600	111055	20522.2	618563	411723	501314	630358	546137	541619	89878.9	575353	531387	479065	614764	510455	542205	53561.4	304796	359713	299472	331405	287283	316534	29026.1
M391T136			391.14	135.69	76	1.07	27325.8	9179.37	7705.28	6318.86	8257.69	11757.4	8764.51	70949.5	38122.8	50806.6	21861.2	57520.3	47852.1	18747.5	116561	108602	76893.4	54707.4	13552.6	74063.2	41961.7	255.416	4649.67	4517.49	17895.9	45490.7	14561.8	18517	114609	58539.5	85708.8	105804	30418.6	79015.9	34677.9	6567.51	6351.76	4859.46	6712.42	5614.2	6021.07	774.724
M341T320			341.353	320.473	77	1.06	9794.79	96332.3	18440.7	81502.1	179344	77082.7	68581.9	13702.5	6192.79	9835.26	8403.74	16191.4	10865.1	4042.58	17591.3	13856.6	29417.2	37014.2	9160.37	21407.9	11503.2	49248.3	16388.6	42005.8	38112.2	38729	36896.8	12289	26945.7	100806	109109	33377.6	50108.8	64069.5	38383.6	16959.4	40892.9	45440.3	11224	10626.9	25028.7	16818.1
M120T60			120.045	59.547	78	1.06	43898.5	44188.8	41153	43743.9	72382.3	49073.3	13087	41272.2	36968.4	73033.7	49999.8	48365.6	49927.9	13957	70835.3	96452.3	115093	80287.9	77913.5	88116.3	17756.9	29106.4	21179.4	18925.5	46800.3	63590.7	35920.4	18951.1	129478	116883	132239	125685	70200.5	114897	25648.8	63491.3	64954	57537.7	72459.3	66706.6	65029.8	5397.06
M271T263			271.275	263.213	79	1.06	18023.4	31471.9	75795.2	83077.8	270138	95701.3	101419	52736.6	18572.3	33576.9	57127.9	46504.9	41703.7	15682.7	125663	24233.1	57186.4	72550.3	14578.2	58842.2	44194.9	82937	19929.6	65581.2	59525.4	77512.6	61097.2	24818.3	94119.8	335253	203956	155839	59651.7	169764	107931	41253.3	606105	595236	95056.3	51070.6	277744	295510
M652T427			651.566	427.344	80	1.05	8.4871e+06	9.51758e+06	6.48449e+06	9.19467e+06	6.53105e+06	8.04298e+06	1.45025e+06	6.80747e+06	1.20689e+07	3.0147e+06	8.92766e+06	8.72085e+06	7.90792e+06	3.323e+06	5.80766e+06	5.36593e+06	9.07418e+06	8.72744e+06	1.06507e+07	7.92518e+06	2.25975e+06	1.58176e+07	1.88359e+07	1.60753e+07	1.50545e+07	1.50018e+07	1.6157e+07	1.56912e+06	1.7008e+07	1.42011e+07	1.75614e+07	1.5166e+07	1.51854e+07	1.58244e+07	1.40488e+06	1.62215e+07	2.55118e+06	6.21098e+06	5.47844e+06	2.90487e+06	6.67339e+06	5.5678e+06
M167T259			167.013	259.185	81	1.05	41426.7	1.28679e+06	270945	156326	231005	397299	504860	160896	173628	141225	269843	144024	177923	53041.3	219250	234063	265235	345161	275045	267751	48834.1	89373.9	105318	119737	196320	148291	131808	42075.9	118592	132365	91150.2	102533	111179	111164	15650.1	91520.1	92645.1	110883	97379.6	99518.1	98389.1	7722.66
M323T372			323.22	371.604	82	1.04	15049.1	12366.4	10973.6	10880	8019.29	11457.7	2555.11	15294.5	22599.8	17008.6	17614.7	18796.7	18262.9	2733.99	19776.9	12724.2	29163.9	26451.4	34216.3	24466.6	8380.6	83562.3	82050.3	72518.1	80631.2	100677	83887.7	10310.4	150869	104331	132630	142481	165481	139158	22894.4	355640	251552	341314	233851	253180	287107	56759.6
M512T400			512.373	399.86	83	1.04	76766.6	97135.4	83317.6	128194	13418.3	79766.3	42043.3	75592.3	304648	58960.3	149420	185564	154837	98601.4	123204	47070.2	288890	249189	314678	204606	114729	275018	385553	412511	210205	184919	293641	102111	340244	317913	325164	170645	365020	303797	76586.3	506716	318484	273254	311921	308981	343871	92719.9
M197T65			197.09	64.955	84	1.04	605.734	5294.16	3914.15	4551.78	3929.66	3659.1	1798.03	2300.44	2181.28	4877.38	3984.38	4134.76	3495.65	1195.05	145349	3625.51	4065.73	4689.88	4415.4	32429.1	63125.5	5300.33	6292.07	474344	392626	4771.01	176667	236216	12207.9	7641.17	7440.56	7751.98	6165.12	8241.34	2306.78	5479.95	5547.09	6411.92	6623.16	5807.42	5973.91	516.542
M182T345			182.102	344.963	85	1.04	54307.6	58936.9	62104.6	56170.9	61507.6	58605.5	3360.64	7109.32	4963.24	5880.59	5621.36	6559.06	6026.72	832.477	6143.54	4718.14	6480.81	37424.1	4346.59	11822.6	14340.4	77453.5	62555.2	76501	66948.3	73866.4	71464.9	6457.08	85152.5	89700.7	78388.4	83880.4	69920.7	81408.5	7582.53	32648	27910.2	23729	22874.5	25488.9	26530.1	3925.15
M303T427			303.29	427.052	86	1.04	8577.87	14033	15230.8	39423.5	31676.3	21788.3	13099.9	22487.7	8106.49	15849.8	15324.7	38352.8	20024.3	11440.6	13226.8	16334.8	10566.4	37372.4	3663.47	16232.8	12708.5	16640.7	27435.2	31196.3	30007.3	6796.62	22415.2	10455.1	4870.44	5828.08	22771.2	5468.59	15313.9	10850.5	7936.88	63945.6	383039	279643	65401.2	287520	215910	143934
M349T366			349.235	365.917	87	1.04	29530.3	36439.8	59746.2	51902.1	61710.6	47865.8	14281.6	2990.99	2340.6	2908.2	2047.3	3430.77	2743.57	549.485	1722.71	4343.28	1972.64	5965.75	1536.21	3108.12	1960.31	32527.4	19782.2	37544.3	26471.6	20915.4	27448.2	7584.98	8223.26	8371.28	6927.1	12520.3	7205.73	8649.54	2252.41	4708.82	5048.97	4302.53	4577.13	4920.7	4711.63	292.817
M279T51			279.135	50.835	88	1.04	15003.2	62316.5	86391	67031.5	56139.4	57376.3	26251.2	83949.4	60216.7	98314.6	110089	71925.3	84899	19955.9	89754	127763	106101	130816	155286	121944	25057.2	47649.8	50580.4	35437.6	26337.5	55568.9	43114.8	11956.4	85942.9	94894.9	94251.7	71164.8	77213.3	84693.5	10439.9	67917.2	63039.7	57228.6	67884.2	68078.1	64829.6	4753.82
M299T402			299.259	401.946	89	1.02	119923	249844	350004	290151	237206	249426	84697.8	178982	106575	200152	193156	153916	166556	37908.4	201093	173551	133752	151564	75439.4	147080	47297.6	340369	88512.2	103287	248087	46574.4	165366	123835	175197	271888	206895	145951	118050	183596	59418.6	61109.5	4964.87	33223.1	12485.5	5020.87	23360.8	24058.6
M344T199			344.064	199.08	90	1.02	5845.81	2889.95	4823.46	4404.89	3851.39	4363.1	1100.47	42422.7	31541.7	47600.4	25615.8	29903.4	35416.8	9205.96	62227.2	49012	42370.8	80068.3	16331.7	50002	23697.8	1125.85	1245.72	1040.04	2239.51	18209.4	4772.1	7527.18	80992.2	55035	74598.4	73291.7	22354.1	61254.3	23793.2	19368.6	21005.9	14330.4	22990.1	17834.7	19105.9	3285.86
M397T525			397.383	525.011	91	1.02	19686.7	673.802	883.742	985.181	1393.43	4724.58	8368.19	936.024	13398.3	1369.19	306.342	469217	97045.5	208122	732.186	776.362	677.37	478.765	1394.35	811.806	344.941	3212.97	3942.34	4716.2	1627	6402.39	3980.18	1770.33	1503.72	753.5	1994.07	869.623	1012.77	1226.74	515.458	748.846	413.336	1202.9	528.931	943.108	767.424	317.452
M650T418_1			649.551	417.824	92	1.01	7.97944e+06	6.33299e+06	5.41468e+06	6.92621e+06	4.39344e+06	6.20935e+06	1.37763e+06	3.83092e+06	8.03417e+06	2.13548e+06	5.88254e+06	5.95363e+06	5.16735e+06	2.25425e+06	4.6986e+06	3.77427e+06	7.96609e+06	6.12327e+06	9.23836e+06	6.36012e+06	2.25648e+06	1.2474e+07	1.4658e+07	1.29545e+07	1.75689e+07	1.59979e+07	1.47307e+07	2.11623e+06	1.65219e+07	1.50652e+07	1.61923e+07	1.69138e+07	1.52787e+07	1.59944e+07	796621	1.35155e+07	1.28708e+07	9.43656e+06	8.58826e+06	1.0533e+07	1.09888e+07	2.13928e+06
M478T375			478.341	374.704	93	1.01	35734.7	19284.7	18695.4	26432.6	5594.29	21148.3	11091.7	47194.1	42212.7	37278.3	30215.5	38162.8	39012.7	6290.79	12540.3	11835.7	13279.7	13693.4	9681.61	12206.1	1580.08	79254.9	80086.7	78609.3	60347.2	13342.8	62328.2	28593.9	92216.5	93674.8	87701	85940.2	832.258	72072.9	39950.5	3055.85	1945.56	13128.9	1785.79	1989.74	4381.17	4915.95
M560T377			560.387	377.243	94	1	28736	24692.9	27389.2	28848	26580	27249.2	1715.27	23067.9	20763.1	24913.4	24114.6	21805.7	22933	1681.95	6611.07	6860.91	8361.2	7649.24	6890.4	7274.56	721.124	126043	98061.4	104206	114913	15520.6	91748.9	43927.4	196925	115843	121710	118518	104243	131448	37191.7	14260.1	14615.3	12433.4	16448	5265.75	12604.5	4342.92
M256T131			256.077	131.21	95	1	79048.6	10883.4	18994.4	13877.2	25161.6	29593	28173	21940.7	15444.8	32315.1	7983.93	15208.7	18578.6	9129.87	49564.2	88880.2	37575.9	75695.3	13682.4	53079.6	29991.7	24845.6	14643.6	17064.9	84186	20769.9	32302	29259.7	10409.1	9144.5	14995.9	12583.8	6753.86	10777.4	3164.24	5928.02	5629.62	4729.74	727.517	693.22	3541.63	2621.97
M435T462			435.272	462.054	96	1	84987.2	15568.7	24022.7	17143.4	49316.6	38207.7	29449.8	34225.4	6374.85	10238.4	19368.6	7591.12	15559.7	11609.2	68780.6	88684.9	43605.2	80649.8	4688.86	57281.9	33976.1	126416	5816.7	7146	6774.49	23334.4	33897.5	52228	3377.64	7716.3	9628.77	14190.2	31011.4	13184.9	10695	10302.8	723.877	2076.14	2124.24	834.57	3212.33	4018.59
M331T401_2			331.275	400.856	97	1	9098.52	9408.76	7473.41	10365	1563.85	7581.91	3521.79	9032.99	23409.6	11009.5	12156.4	16506.1	14422.9	5721.45	11195.3	7605.11	21880.9	20454.2	30612.5	18349.6	9136.54	50447.4	56490.6	46434.7	52578.8	55564.5	52303.2	4066.01	75975	63396.1	72359.3	77969.7	65587.6	71057.6	6369.28	112438	381060	105748	286448	437672	264673	151972
M537T409_1			537.333	409.178			28744.9	19046.2	17050.5	16275.6	7446.19	17712.7	7605.79	11224	10859.4	7006.12	14135.7	10296.5	10704.3	2545.15	7885.39	5227.65	16951	12606.9	32548.6	15043.9	10765.6	132559	151342	104415	35603.8	63600.3	97504.2	47844.2	87101.9	8831.68	85849.1	86312.2	44294.5	62477.9	35104.1	83749.3	12001.2	59605.9	9047.12	9432.71	34767.2	34777.3
M189T114			189.102	114.158			23879.5	5457.55	11594.6	13698.9	13501.6	13626.4	6633.36	9381.58	5493.05	18847.4	8721.69	4271.4	9343.03	5728.55	32052.1	63733.4	16783.3	49266.7	14676.6	35302.4	21108.4	7544.82	17758.7	7826.25	29031.7	16656.5	15763.6	8822.84	9408.94	21866.7	8651.56	9133.3	12352.7	12282.7	5550.24	4983.3	3270.03	2931.52	5431.26	3806.84	4084.59	1082.99
M199T60			199.056	59.9215			85158.9	43410.6	46342.6	42778.9	18227.4	47183.7	24056.8	5190.82	3198.24	4204.14	4108.87	3464.97	4033.41	773.802	4366.95	5239.26	3418.35	3333.94	2606.36	3792.97	1022.29	34121.4	20364.6	33274.2	131571	121872	68240.6	53772.4	9558.48	8934.8	10694.7	9961.97	15266.6	10883.3	2532.27	2048.66	2168.09	2520.28	2771.06	2412.58	2384.14	286.477
M178T132			178.05	131.609			35952.2	8642.19	14880	14779.2	18416.9	18534.1	10352.6	50212.5	30363.7	47839.8	26089.5	45323.7	39965.8	10959.6	79699	76853.9	76741.7	92304.3	48924.3	74904.6	15873.6	83252	60488.1	66696.9	124662	92745.5	85568.8	25349.1	206493	149935	193361	202205	98742.4	170147	45811.5	84963.4	90642.6	84399.5	99128.8	85921.6	89011.2	6168.98
M363T364			363.214	363.547			33656.2	15523.1	14123.6	13385.4	12681.8	17874	8885.05	16728.9	25991.7	16683.5	9530.19	17829.8	17352.8	5849.97	11644.2	9218.73	13262.1	14058.4	6501.06	10936.9	3093.53	13464.2	19591.6	13023.1	28264.6	39444	22757.5	11179.4	99151.3	121304	113416	121197	47498.2	100513	30979.7	48513.6	30202.8	31481.8	33097.5	14832	31625.5	11952.4
M104T43			104.071	43.07			4506.27	12517.1	10370.1	8898.82	7793.84	8817.23	2989.1	10552.3	7426.68	9894.05	9784.28	8969.14	9325.3	1201.19	424003	8817.01	8997.54	11832.8	13134.3	93356.8	184846	14723.3	12860.4	16992.4	9951.1	22973.4	15500.1	4910.2	18977.8	14619.1	29122.1	28378.7	32810.8	24781.7	7635.54	21261.1	17190.1	19737.3	23551.7	24331	21214.2	2896.32
M307T400			307.227	400.447			33244.6	41870.3	71567.7	74383.8	31608.5	50535	20877	26884.8	15044	25100.5	13500.8	45860.7	25278.1	12939.3	15283.9	18487.7	18591.8	40648.2	6904.01	19983.1	12493.6	50232.8	75492	82924.8	39751.5	180495	85779.2	55828.2	144708	233425	120893	234856	205670	187911	52317.7	150493	6483.11	134867	8853.37	10993.8	62338.2	73567.1
M291T358			291.194	357.671			43487.9	16022.5	30762.8	26843.2	43569.3	32137.1	11716.8	27570.7	15614.6	33466.8	15860	30336.2	24569.7	8328.74	22030.2	29533.2	25412.1	25571.7	9529.75	22415.4	7677.8	293117	70394	256709	122170	50153.8	158509	110214	39031.1	66185.3	92003.6	44673	32611.5	54900.9	24275.6	22729.3	26284.7	32299	29670	21368.7	26470.3	4589.86
M668T410			667.561	409.759			51138.9	80138.8	63082.3	90456.2	77966	72556.4	15456.6	34402.7	89381.9	18010.8	58078.2	54002.8	50775.3	26906.3	36739.7	26487.4	71712.5	27874.9	93104.7	51183.8	29751.6	262380	294285	215200	405923	358317	307221	75826.7	374313	300376	317050	405126	401094	359592	48293	304213	285904	213070	179595	204054	237367	54456.1
M271T376			271.228	375.789			43251.2	56064.9	70309.7	52312.9	46962.3	53780.2	10463.5	48925.2	27227	46510.9	39849.4	37053.6	39913.2	8571.3	44029.6	44472.3	38540.9	47833.7	21528.9	39281.1	10468.2	166991	90453.8	93291.7	283593	72596.6	141385	87346.4	213306	213087	212325	207250	179998	205193	14300.5	40559.9	7385.01	23703	12364.4	6276.82	18057.8	14346.8
M317T152			317.121	152.274			6664.08	5898.94	879.504	1554.88	4954.68	3990.41	2613.92	22144.5	20077.7	13170	8709.03	13640.9	15548.4	5479.41	14371.7	22663.1	10103.8	9513.55	6286.57	12587.7	6324.97	13310.4	16758.8	12073.4	12213.1	32973.5	17465.8	8873.08	102466	74849	85887.1	95708.9	51303.5	82042.9	20095.4	141334	137191	125832	126023	147204	135517	9449.28
M324T477			324.327	477.043			29880.9	11738.3	146261	234599	131063	110708	91317.1	87716.6	115640	29095.1	46464.5	200747	95932.5	67742.5	145069	46561.7	66346.1	979364	6930.79	248854	411453	1179.46	1520.49	1785.37	1763.92	3288.66	1907.58	809.776	1200.83	773.08	2093.93	2152.82	1402.55	1524.64	592.305	1270.18	1387.89	2040.93	346.156	369.124	1082.86	724.254
M652T442			651.566	442.298			4.74953e+06	5.04272e+06	3.10044e+06	4.79985e+06	2.7056e+06	4.07963e+06	1.08878e+06	4.01001e+06	5.46759e+06	2.04255e+06	4.44676e+06	5.4136e+06	4.2761e+06	1.39663e+06	3.13801e+06	3.28575e+06	7.10044e+06	3.75535e+06	5.92634e+06	4.64118e+06	1.77349e+06	5.53659e+06	9.61969e+06	1.23906e+07	4.6712e+06	5.79906e+06	7.60342e+06	3.28282e+06	9.7176e+06	8.60483e+06	8.69202e+06	1.21931e+07	5.02817e+06	8.84714e+06	2.57975e+06	9.19724e+06	1.12747e+07	1.18892e+07	1.8493e+07	1.21963e+07	1.26101e+07	3.49037e+06
M569T387			569.293	387.377			47129.7	46928.8	68585.3	67875.7	76088.4	61321.6	13438.2	38567.9	49815.7	32997.1	54966.9	46097.1	44488.9	8773.09	57048.3	44023.8	64922.2	42373.1	41738.4	50021.2	10422.2	238075	174181	140226	103953	127246	156736	52078.3	192088	244788	219222	171805	173862	200353	31287.4	47143.4	5338.65	25003.9	19554.7	2177.32	19843.6	17989.5
M353T402			353.256	402.406			17467.3	24314.3	23105.2	21536.8	2368.44	17758.4	8983.05	20156.3	42580.5	21213.1	25341.1	23734.2	26605	9161.26	3279.02	17327.2	39442.2	29549.2	48504.2	27620.4	17875	51054.9	60233.1	52162.7	39116.1	44913.6	49496.1	7961.92	58530	56767.4	61409	50867	62493.2	58013.3	4595.92	78917	393914	82146.5	336111	414336	261085	167304
M399T506			399.362	505.603			2075.24	20694.9	3402.07	3003.16	3586.54	6552.38	7927.38	1989.74	6710.23	1408.51	2501.97	2582.57	3038.6	2105.6	1415.75	2820.7	3168.39	3488.56	2042.25	2587.13	847.645	3060.09	4183.03	4310.37	7574.05	3471.2	4519.75	1782.98	4680.33	6906.78	5729.91	4268.71	9460.12	6209.17	2084.93	2718.97	2030.2	3362.25	1204.16	981.325	2059.38	1003.37
M353T498			353.361	498.105			33148.1	7080.89	97833.8	141206	62546.2	68362.9	52924.5	67412.4	54367.4	6263.78	26443	84576.5	47812.6	31470.9	92675.4	27419.1	29552.4	607516	2777.98	151988	256805	560.126	369.247	323.103	594.545	1007.76	570.957	270.921	510.227	278.672	451.611	541.924	442.75	445.037	101.689	422.471	415.244	370.296	95.5262	182.033	297.114	149.085
M390T421_1			390.298	421.122			70222.5	40664.1	41852.1	30783.1	64192.6	49542.9	16823.9	19577.2	3589.99	12714.3	11222.3	11822.5	11785.3	5680.18	42737.2	48687.5	28643.4	33717.7	4589.87	31675.1	17020.3	89305.9	13750.7	21953.9	15972.8	32139.9	34624.6	31386.2	42535.2	67940.5	68833.9	38580.2	31481.8	49874.3	17360.6	22929	2562.33	18987	3356.77	1366.77	9840.37	10268.7
M352T402			352.254	402.267			125354	179253	177773	173338	75308.4	146205	45513.6	158839	312079	167232	189156	206365	206734	61768	200673	134198	310329	244792	363492	250697	89983.3	391444	435129	397534	286420	335602	369226	58364.2	440732	428180	413670	391490	441194	423053	20929.7	318410	59129.2	607653	50867.7	52349.8	217682	246234
M104T44			104.052	44.364			75388.9	6822.18	13343.7	7286.25	7970.88	22162.4	29869.9	257628	229944	4456.72	5699.01	7032.7	100952	130759	166930	6459.76	6339.09	8834.94	6837.02	39080.2	71477.5	17338.6	11645.8	3719.82	3406.77	15189.1	10260	6443.28	18259.7	18278.9	17221.7	18280.7	23979.5	19204.1	2708.1	23790	15871.1	26793.5	24961.6	31761.7	24635.6	5767.93
M570T394			570.458	394.195			17957.5	27839.1	3022.93	22778.8	20548.8	18429.4	9347.91	10814.9	1183.62	8174.94	1619.41	4715.67	5301.71	4168.7	2758.13	7115.6	22779.7	8580.84	66426	21532.1	26196.6	96021	146065	105148	264949	384053	199247	123297	215793	113400	174288	307395	234790	209133	72001.8	59894.8	45410.9	17119.3	56295.8	51306.3	46005.4	17041.6
M652T417			651.557	416.73			736053	650696	557908	723822	464025	626501	115284	422202	813221	236500	586571	577467	527192	214121	462951	398972	765344	614647	896874	627758	206779	1.25105e+06	1.63646e+06	1.30216e+06	2.01873e+06	1.59268e+06	1.56022e+06	307927	1.69593e+06	1.48113e+06	1.59648e+06	1.70106e+06	1.66045e+06	1.62701e+06	91604.4	1.37048e+06	1.32875e+06	907011	948360	939287	1.09878e+06	229970
M313T294			313.322	294.319			9730.48	62271.6	22906.9	69199.1	133127	59447.1	48318.7	18974.9	6750.26	6922.39	15813.4	20617.7	13815.7	6601.39	19930.7	13345.7	28287.4	27231.2	6833.42	19125.7	9148.65	35569.3	18121.2	26294.5	30861.9	27698.5	27709.1	6435.3	22678.8	116298	61441.8	26101	55663.8	56436.7	37646.1	12868.8	41047.3	43328.7	9877.85	9769.26	23378.4	17234.6
M351T401			351.251	401.389			549963	861545	775823	860065	347501	678980	224736	691112	1.32123e+06	740585	837739	866419	891416	250557	869491	597036	1.36061e+06	1.18087e+06	1.55678e+06	1.11296e+06	383527	1.71128e+06	1.84426e+06	1.71599e+06	1.26463e+06	1.42295e+06	1.59182e+06	239263	1.87095e+06	1.81119e+06	1.78282e+06	1.63309e+06	1.86393e+06	1.7924e+06	96320	1.39009e+06	251047	2.67321e+06	2.26693e+06	240899	1.36443e+06	1.12138e+06
M312T386			312.254	386.32			28860.8	37276.9	34156.8	31721.3	32020.4	32807.2	3129.34	23478.8	13258	28099.7	19802.5	15785.3	20084.8	5935.67	28554.2	22683.1	28066.8	20898.7	13883.8	22817.3	5999.51	124773	56984.2	52664.7	66366.2	73763.7	74910.3	29055.1	97336.1	117164	106730	114590	80870.7	103338	14748.4	25658.5	779217	14823.3	412553	555928	357636	334588
M610T406_1			609.52	406.282			38415.3	57343.2	35589.5	53218.8	33137.5	43540.8	10976	892.967	181843	65100.1	137255	782.133	77174.5	81187.3	58603.7	26613.7	190356	35351.7	293299	120845	116870	142707	184349	117345	306925	386520	227569	114871	253334	174983	273360	236830	243645	236431	37005	239084	379830	289967	244307	295247	289687	56517.4
M736T427			735.575	426.89			7116.82	11642.7	7324.02	6922.56	2179.18	7037.06	3350.86	16284.2	50980	14265.8	23273.3	17274.7	24415.6	15224.2	30154.1	13483.2	67007.7	52330	107044	54003.8	36041.2	19815.4	24528.2	25540.3	6834.15	10780.7	17499.7	8341.35	65687	59602.7	101830	22349.4	22066.3	54307.1	33454.2	208870	171864	120395	172446	2994.55	135314	80399.4
M219T51			219.113	50.638			34713.7	3693.01	26376	24080.8	15290.3	20830.8	11815.7	9852.69	4021.06	10245.7	5246.18	7989.9	7471.1	2761	32938.3	76456.2	11412.9	67926	1075.85	37961.9	33430.3	38107.4	30203.3	33463.7	128161	88784.7	63744	43231	73997	47179.9	69111.5	59445	9549.55	51856.6	25774.4	7090.09	16013	14572.3	9306.02	8742.04	11144.7	3906.47
M513T400_2			512.875	400.035			50968.6	63732.5	55512.2	79118.8	8614.2	51589.3	26305.7	48453.9	200840	38159.1	95027.2	120434	100583	65365.4	80123.6	31006.9	188177	161340	202773	132684	74016.9	178330	250332	264207	136059	110589	187903	67964.4	215171	207238	204839	100055	227445	190950	51572.2	180594	203942	36207.8	184968	15960.6	124335	90402.1
M337T352			337.105	352.326			1293.72	1035.31	1597.6	1588.25	1158.34	1334.64	252.894	853.323	1765.39	1392.83	1303.19	1570.24	1376.99	342.097	1486.79	1043.75	527.817	1288.54	732.602	1015.9	392.215	78097.8	77015.4	65930.2	27619.4	14823.6	52697.3	29474.5	3577.36	3676.95	3882.43	3596.12	2664.23	3479.42	471.484	23083.6	23080.5	21987.2	24272.6	23867.9	23258.3	877.245
M348T392			348.204	391.793			1685.96	4016.41	12530	531.561	15165.1	6785.8	6633.28	1189.01	7456.69	793.783	10374.8	1251.33	4213.13	4418.61	55756.6	1364.73	16047.1	5786.89	20060.3	19803.1	21466.6	1787.53	1291.75	1155.63	308.216	1083.91	1125.41	533.036	626.657	777.826	1098.48	710.716	756.572	794.051	179.799	885.217	203043	598.34	285115	218109	141550	132200
M301T371			301.238	370.921			6829.48	4518.8	3585.83	3733.79	2550.76	4243.73	1606.3	5344.68	10192.8	5530.07	6922.59	8241.05	7246.24	2021	8902.84	4700.13	12932.3	10682.9	14060.5	10255.7	3691.8	28283.7	28142.4	25657.4	40228.5	40143.6	32491.1	7101.78	65170.9	40179.2	57677.4	72251.5	63146.9	59685.2	12088.2	186458	149494	203665	113635	121261	154903	39489.1
M317T328			317.147	327.554			8055.91	2048.22	1910.15	1859.82	2367.31	3248.28	2694.81	4850.26	3858.57	5698.16	1792.31	5879.22	4415.7	1670.93	17025	14047.3	14160.4	23578.6	6017.95	14965.9	6324.11	88492.8	25342.4	36666.6	140288	43253	66808.6	47571.8	212045	151164	212049	295140	74767.4	189033	81866.6	86106.5	83924.5	70537.9	60077.5	67745.9	73678.5	11062.1
M298T382			298.275	382.444			119341	122089	75048.9	85436.8	170898	114563	37625.7	131883	113693	94603.4	148731	186690	135120	35199.1	183585	143229	245943	179016	298998	210154	61904	134941	89857.5	76582	146003	704105	230298	266479	176637	112614	162027	408747	340469	240099	127369	265495	14528.2	248176	26558.6	4316.66	111815	132760
M291T276_2			291.113	276.369			117387	10616.3	57930.4	51014.1	50775	57544.5	38314.3	1829.28	1778.88	35946.7	14835	1769.33	11231.8	14925.8	434.299	15180.3	38863.4	1604.51	1635.81	11543.7	16431.4	5244.59	34992.9	3606.25	74598.9	61487.4	35986	32154.9	5858.67	6206.53	6068.06	5368.21	5747.16	5849.73	323.048	4426.93	4272.43	4520.2	4995.41	3972.53	4437.5	374.717
M120T243			120.045	242.876			760186	72631.9	152428	126202	318171	285924	280531	254379	186607	262974	150583	168517	204612	51061.5	318032	309588	171522	233789	74934.2	221573	101499	141967	325122	175561	610449	488028	348225	200746	231935	342973	310019	273190	355413	302706	50824.8	80737.6	89930.8	69009.3	81137.6	66142.7	77391.6	9737.3
M513T360			513.304	360.149			132167	108843	151858	137692	142138	134540	16074.5	80640.6	35354.7	122322	76143.5	90257.7	80943.7	31226.6	121644	52468	85959	79370	35300	74948.1	33161	373427	109116	73023.5	68361	274475	179680	137177	140858	108575	83927.2	170403	272175	155188	73098.8	35608.2	20304.2	19208.2	16900.9	14313.2	21267	8340.47
M398T133			398.149	133.161			34701.1	23071.5	27005.8	33247.3	32752.3	30155.6	4926.18	27743.7	30245	38472.1	39083.5	46390.9	36387	7485.47	33020.2	19367.8	44642.7	32077.9	31359.4	32093.6	8955.8	213886	112494	160968	173197	219937	176096	43682.5	170464	175227	181115	183420	101392	162324	34437	134815	134287	120999	139543	135536	133036	7039.34
M660T470			660.46	469.94			3649.3	2598.05	2185.35	2795.64	1628.18	2571.3	750.261	4830.49	7011.26	5376.95	5825.35	5333.75	5675.56	825.633	6222	3742.82	10041.3	9094.45	17811.5	9382.42	5323.53	18607.8	21770	18887.7	6212.25	5144.82	14124.5	7817.93	25783.7	34346.2	34649.1	5779.25	13745.6	22860.8	12789.5	171090	154925	115697	279106	26781	149520	91509.4
M130T43_3			130.098	42.826			64975.9	7666.14	11646	9999.01	16581.8	22173.8	24149.7	21077.7	15266.7	15270	10881.5	16501.3	15799.4	3643.6	24188.8	18551.9	17641.3	23928.2	12684	19398.8	4805.07	103875	70427.1	100326	167612	160789	120606	41932.7	75475.7	56717	84736.8	74353.1	41169.1	66490.3	17408.2	44701.5	60158.4	52524.5	60534.2	51543.3	53892.4	6618.91
M357T362_2			357.261	362.117			64840.9	28507.9	29233.5	54469.9	63764.5	48163.3	18069.2	32942.5	29525.3	40141.7	35540.2	98124.6	47254.9	28699.9	28058.9	25490.1	28772.9	52884.4	24607.9	31962.9	11822.8	66309.1	143907	232053	198247	95006.7	147104	69072.4	80973.6	40647.9	51056	88927.1	144672	81255.3	40747.9	133001	179531	182766	70453	448721	202894	144748
M674T481			674.475	480.623			3785.08	1947.51	2078.79	2954.95	1587.83	2470.83	890.065	4634.51	8266.25	4141.52	6296.72	7097.45	6087.29	1710.9	5202.79	3559.64	13691.7	10021.7	22115	10918.2	7427.65	11906.6	24525	14250.2	7740.66	7585.54	13201.6	6934.67	35654.1	32185.2	40059.7	7763.41	15209.3	26174.3	13946.3	218539	325986	256481	18731.2	38571.3	171662	136298
M275T396			275.259	396.037			18553.6	29463.2	28827.4	61794.7	36452	35018.2	16273.5	41813.9	23618.5	36247.4	36677	73692	42409.7	18727.6	23989.7	26372.3	33294	58508.8	17685	31969.9	15852	160753	351041	216138	297817	104564	226062	99867.6	59549.8	56974.6	153496	173748	351952	159144	120185	308455	14226.5	519897	207494	15203.6	213055	213285
M340T398_1			340.254	397.886			73381.6	76472.9	60197	73443.6	19947.7	60688.6	23627.3	60479.5	172199	48338.4	103637	118710	100673	49508.9	94179.2	49081	165164	148828	169696	125390	52181.2	103873	79443.5	109348	64134.4	77111.7	86782.2	19115.6	73432.8	91092.2	76949.8	70184.1	80743.9	78480.6	8075.11	96942.5	126443	88504.1	143364	129784	117008	23248.6
M368T421			368.316	420.674			67469.1	32138.8	40058.7	34251.5	76767.4	50137.1	20539.2	18897.5	2814.95	24485.8	10416.4	14671	14257.1	8246.28	44553.2	55136.7	30982.7	45080.1	4389.16	36028.4	19661.1	129042	14348	26532.5	16146.3	37358.6	44685.4	48046.9	56936.8	94687.4	107465	50845.3	35562.5	69099.4	30547.2	46516.5	5116.1	39354.8	6399.61	3103.3	20098.1	21033.8
M355T396			355.282	395.703			18507.5	39616.7	31030.1	38764.3	30305.1	31644.7	8499.99	26126.9	20687.4	16943.6	22503.2	69094.9	31071.2	21512	37156.8	31778.5	22007.2	64254.2	19021.2	34843.6	17992	14524	15533.1	19073.5	25692.5	29563.3	20877.3	6534.76	16995	12835	13780.5	19154.5	18577.3	16268.4	2835.76	18555	328626	31730.6	252930	372092	200787	165979
M313T299			313.116	298.858			3621.74	6899.36	1319.77	1950.05	3057.45	3369.68	2170.09	5256.65	4712.24	38732.7	22354.4	3482.24	14907.6	15416.8	27843.6	40283.2	66038.7	15034.9	24905.4	34821.2	19639.7	1618.75	1540.61	1814.27	2220.77	2272.81	1893.44	338.113	5969.47	76701.1	7917.52	10523.2	74941.4	35210.5	37112.7	4780.68	3634.78	7014.48	4109.97	3535.85	4615.15	1428.76
M356T380			356.28	380.353			20450.3	34609.4	44799.3	41308.2	34254.9	35084.4	9329.84	26248.2	19936.6	34124.3	26615.6	22397.5	25864.5	5387.38	23513.5	16985.6	22694.2	21664.9	18303.9	20632.4	2843.35	122136	65900.6	60345.9	171885	51993.3	94452.2	51340.7	132309	167294	119983	134076	98139.1	130360	25137.5	12534.2	10223	6438.26	17015.3	9342.32	11110.6	3957.2
M319T242			319.106	242.123			1636.86	1144.32	1257.68	1468.32	1310.72	1363.58	192.181	869.875	828.028	1334.75	1505.12	1227.46	1153.05	295.097	3527.83	3208.83	4834.78	4581.89	2303.38	3691.34	1035.19	3787.48	3126.12	2459.8	4861.54	9893.99	4825.79	2968.7	51419.3	95261	53581.5	91985.8	39470.8	66343.7	25502.4	22084.1	20370.5	18416.6	16937.1	12635	18088.7	3617.57
M331T401_1			331.259	401.421			2969.64	10786.6	19432.4	13547	14389.2	12225	6043.76	8396.4	1027.5	5680.55	7270.64	4268.92	5328.8	2869.2	8535.85	7885.23	13759.2	1426.07	18155	9952.28	6339.42	2271.62	727.709	34374.6	37969.7	940.61	15256.9	19144.4	596.495	45154.6	47482.7	51082.2	382.432	28939.7	26057.2	72988.8	217133	48639.7	74246.5	348113	152224	128135
M657T344			657.469	344.366			5657.67	5335.36	6678.28	5400.67	5510.41	5716.48	551.356	1297.75	673.307	805.637	596.534	1164.44	907.534	308.317	936.724	1081.97	821.794	3541.39	654.185	1407.21	1203.29	143809	128920	105510	81352.7	71603	106239	30600	102326	111697	92599.4	102182	95183.5	100798	7446.14	27565.1	21712.3	15776.1	19237.7	16621.3	20182.5	4739.04
M593T393			593.488	392.76			8539.91	9418.28	9239.76	11616.2	9832.15	9729.26	1153.46	3463.17	10825.6	8228.89	7361.12	5846.65	7145.08	2739.05	5453.93	3751.24	10362.9	7056.23	35093.4	12343.5	12949.2	56904	81159.9	54118.5	234990	226797	130794	92027	150320	82114.7	124947	227204	159443	148806	53100.6	35160.4	15693	14014.2	6045.06	21824.8	18547.5	10859.8
M242T51			242.114	50.598			65046.9	7547.33	687.982	12557.1	17784.1	20724.7	25568.2	1982.15	2196.63	946.103	1231.41	793.184	1429.89	626.841	2184.78	1062.26	897.657	908.126	1245.64	1259.69	536.103	1395.64	36419.4	40886.3	227386	60546.8	73326.8	88721.7	2058.01	2629.45	2465.79	3312.83	3310.65	2755.35	548.888	5974.88	5047.78	5612.79	4873.35	7084.95	5718.75	881.508
M319T396_2			319.285	395.796			14074.9	23272.8	25308.4	54378.1	32345.3	29875.9	15170.6	27377.4	20340.6	23707.6	34994.1	69249.9	35133.9	19833.6	15127.2	18969.5	21098.2	44764.8	12451.3	22482.2	12898.5	81140.5	156579	171819	319383	72946.6	160373	99185.2	44387.1	42150.6	122170	85681	154521	89781.8	48954.9	149723	21456.3	273079	81483.6	14118.4	107972	107236
M739T763			738.505	763.314			6812.79	3989.32	3326.73	2471.81	1750.09	3670.15	1950.55	7655.73	8115.94	11033.8	9634.01	8236.25	8935.15	1386.47	9109.41	3415.07	20584.3	20560.1	42818.8	19297.5	15104.2	33327.7	70106.5	53135.4	12227.4	12763.7	36312.1	25340.6	40271.4	57537.1	71513.5	10482.3	18496.8	39660.2	25660.4	164111	154405	103913	143422	94300.5	132030	31119.3
M707T469			706.617	468.925			135084	79979.4	55456.6	87553.6	38948.7	79404.5	36664.5	52471.9	124171	7298.39	68243.7	68718.6	64180.7	41858.8	64861.2	45077.2	141617	84571.5	131445	93514.5	41832.4	129149	212116	158044	440435	205121	228973	123050	190010	234230	129835	211653	311424	215430	66248.1	123198	78889.8	79767.1	56227.8	68257.2	81267.9	25309.6
M340T447			340.321	447.019			2213	9841.82	5720.89	78900.7	130813	45497.8	57274.5	7457.14	2347.5	5801.81	3597.13	7430.86	5326.89	2294.51	8443.22	6223.78	7800.91	30396.3	2727.56	11118.4	11001.9	1328.54	2291.79	3438.68	5810.64	6363.96	3846.72	2186.26	5754.47	9859.97	33840.9	9650.35	3503.84	12521.9	12216.3	5746.91	13977.9	11860.6	1298.01	834.025	6743.49	6001.87
M365T338			365.23	338.007			19217.8	3502.59	11664.6	6740.7	6564.49	9538.03	6150.47	13673.8	17741.9	20828.7	6350.45	9180.78	13555.1	5947.49	10289.8	12407.1	16019.7	10895.9	21113.9	14145.3	4486.63	106077	60550.1	150733	102288	25990.7	89127.7	47588.3	35218.3	49347	39575.3	36734.4	32196.3	38614.3	6564.55	55450.7	50999.2	48458.9	36258.8	37512.9	45736.1	8469.46
M398T62			398.169	61.996			92511.7	444.066	10672.5	13174.5	7574.97	24875.5	38110	4224.24	2929.17	2690.85	2183.92	4651.14	3335.86	1052.09	11085.4	5348.06	3582.78	13747.2	1103.65	6973.41	5276.95	103092	39704.8	79561.9	43569.3	59117.9	65009.1	26442.2	20028.8	11818.7	21000.6	22277.6	3569.38	15739	7942.12	8716.55	12421.4	7305.21	7248.15	3991.11	7936.49	3048.01
M343T67			343.13	67.365			106241	23213.4	19228.9	24922.5	32052.6	41131.7	36692	14156.1	15615.2	18238.4	13639.2	15387.4	15407.3	1785.37	23781	19592.9	28161.9	32961.9	18682.8	24636.1	5986.6	154410	88500	115452	263357	111963	146737	69351.7	209600	217157	194106	169704	106431	179400	44644	69445.6	83405.7	70701.7	91539	62562.2	75530.8	11692
M255T400			255.212	399.844			6740.14	9976.53	370.753	448.205	704.044	3647.94	4451.34	13378.7	15277.2	24249.4	9765.91	29840	18502.2	8284.76	5885.05	8141.65	12924.9	13138.7	14296.4	10877.4	3653.88	82101.3	58771.1	60140	248.688	54867.2	51225.6	30420.4	103747	117134	97676.7	96878.5	79004.8	98888.3	13760.4	42345.4	8020.19	35602.6	6297.72	46815.5	27816.3	19284.9
M191T372_1			190.61	372.108			16336.4	11816.4	10599.9	11099	459.701	10062.3	5831.27	13464.5	22659	10832.2	17236.5	19243.2	16687.1	4668.11	22385.9	11133.5	29836.6	28066.6	25827.4	23450	7426	33827.6	36249.1	35862.3	35412	45379.8	37346.2	4584.39	61694.8	47023.3	52832.6	58242.2	58358.8	55630.4	5765.25	151360	129488	134924	116432	117092	129859	14416.7
M213T63			213.103	63.227			91100.9	11372	7181.22	7165.1	12397.7	25843.4	36557.8	94731.8	31241.9	17723.6	11819.5	17873.8	34678.1	34317	103905	151719	31306.5	34979.2	15955	67573	57971.2	12156.7	7084.48	8205.43	25056.7	12010.4	12902.7	7158.7	23416.4	18044.2	23475.4	20420.6	13299.7	19731.3	4251.04	11363	13386.7	10774.4	12857.1	11400.3	11956.3	1108.54
M139T43			139.051	42.855			3147.94	17521.7	35137.1	24864.2	31545.3	22443.3	12711.9	3438.45	2762.6	5043.17	758.959	3291.52	3058.94	1542.16	2968.67	3107.41	4540.13	4012.68	6701.32	4266.04	1507.94	70818.9	44789.5	47601.6	21996.7	32943.5	43630	18293.1	6810.48	5871.13	5958.85	7771.66	4845.19	6251.46	1099.02	1095.88	4283.39	4708.59	3578.7	5893.98	3912.11	1784.82
M205T398_1			204.625	398.3			236150	165712	152440	160672	121425	167280	42166.7	220035	352413	159545	278653	271347	256399	71833.9	100367	195276	330266	335684	135313	219381	109127	89287	62595.9	99011.4	46630.5	76517.6	74808.5	20865.5	54924.1	76957.3	50657.5	48863.1	66379.8	59556.3	11878	73632.2	235584	74848.9	199935	256033	168006	87919.8
M505T76			505.201	75.989			2829.02	1364.66	884.126	1355.78	1386.51	1564.02	737.751	2483.41	1921.75	6426.61	3322.26	4203.22	3671.45	1765.54	5086.83	3764.5	7051.8	6504.8	4098.2	5301.23	1446.36	3403.9	2864.49	2187.13	5092.8	14313.5	5572.37	5003.32	58016.9	53742.9	60425.7	68013.7	37649.7	55569.8	11279.3	23533.3	23523.4	20262.7	25296.1	23014.2	23125.9	1819.62
M450T373			450.275	372.863			1128.5	32639.8	41915.4	15028.8	63035.2	30749.6	23953.9	489.889	2240.88	599.294	24003.1	942.318	5655.1	10280.5	1542.87	698.481	794.376	942.304	3444.54	1484.51	1143.81	947.463	365.385	3616.47	1869.59	6814.4	2722.66	2596.97	1461.55	1565.04	1616.5	1557.22	445.597	1329.18	497.098	6992.73	6590.37	6317.16	6935.3	7916.04	6950.32	605.205
M547T529_2			547.472	529.422			32669.8	32176	20241.5	19567.8	22023.8	25335.8	6533.9	33652.9	117826	26071.4	74429.9	32160.4	56828	39121.8	50924.5	35407.1	51995.8	38594.8	51151	45614.6	7953.57	73105.1	94907.9	49437.2	82229	113530	82641.9	23969.9	95563.1	68703.4	77588	112821	166003	104136	38525	74808.2	14862.3	63392.6	14805.2	9496.33	35472.9	31038.3
M250T253			250.113	253.254			45403.6	84348.5	101806	102837	99228.8	86724.9	24271.9	64858.3	66166.4	68387.4	69339.5	70478.2	67846	2302.16	69327.9	49830	74959.9	87111.8	38012.9	63848.5	19740	8979.71	7205.68	7322.81	23851	16428.9	12757.6	7265.95	32034.4	29802.1	32458.9	29972.6	22328.3	29319.3	4085.43	12782.9	13017.3	10849.4	11070.1	11057.7	11755.5	1051.83
M333T261			333.142	261.277			981.501	1005.32	1285.67	1495.47	909.524	1135.5	246.908	820.017	1051.27	1670.69	1127.78	1993.32	1332.62	483.4	2427.28	9089.22	10879.7	7326.45	1383.66	6221.26	4151.63	56847.6	25565.6	26715.1	66961.1	30134	41244.7	19269	14844.5	14926	12113.8	14544.1	6150.63	12515.8	3742.42	4166.91	3074.28	2198.3	3149.07	4517.16	3421.14	928.316
M383T455			383.306	455.18			1186.18	1265.06	1416.52	2278.4	1177.77	1464.79	464.81	1236.9	1333.35	1860.33	1342.11	1921.99	1538.94	324.909	2074.58	2363.52	21503.3	3081.66	17407.7	9286.16	9402.72	1741	1333.24	2565.71	2745.01	2831.28	2243.25	667.439	3870.19	167351	10348.5	12560.8	179097	74645.3	90141.6	4825.97	724.946	1570.29	1351.51	635.599	1821.66	1726.24
M327T378_2			327.251	377.954			5599.36	4520.08	9791.57	10988.3	9252.67	8030.4	2809.68	11638.9	30082.4	24032.5	11253.4	18235.7	19048.6	8107.32	5946.44	10154.1	10310.7	12695.8	6364.89	9094.39	2869.33	47619.6	131402	155775	72764	47051.9	90922.4	49934.6	25743.2	24826.8	33159.5	89162.4	113606	57299.6	41287.6	174930	35280.7	185275	13817.4	52125.3	92285.8	81389.3
M547T420			547.404	419.973			88246.9	70784.4	79986.3	66792.1	87352	78632.4	9644.77	77252.4	29624	44206	56916.2	42126.3	50025	18036.6	109439	98427.9	53545	71896.4	24977.8	71657.2	34099.8	48099	19616.5	31581.9	16765.5	24408.3	28094.2	12511.5	27751.8	38655.7	40886.5	21937.3	25527	30951.7	8351.31	36444	33164	36220.2	58796.5	1149.79	33154.9	20627.9
M367T352_1			367.245	351.915			17850.8	11156.3	23712.9	8663.08	4588.61	13194.3	7600.44	6140.25	14073.8	23276	14090.4	11987.3	13913.5	6161.3	10262.7	9944.96	18251.4	9507.83	17585.1	13110.4	4403.42	24098.4	43079.1	90463.3	236943	44176.5	87752	86907.3	72953	146417	64766	85036.3	210013	115837	61644.6	53122.1	36763.2	52342.1	23464.9	33551.6	39848.8	12746.3
M170T92			170.021	92.187			1.44026e+06	28964.5	74445.7	72105.9	76742.1	338503	616215	149770	132250	82013.8	59821.3	104187	105608	36452.7	286649	128458	88683.6	147026	42692.9	138702	91899.7	106670	80490.7	97656.6	181619	122204	117728	38774.4	101674	61301	86038.5	89224.8	16601.6	70967.9	33735.8	31113.3	49946.5	27968.4	33715.4	23479.7	33244.7	10086
M351T422			351.251	421.607			73416.6	94689.1	37431.5	24216.9	25146.8	50980.2	31547.9	25233.5	122106	33218.1	91507.5	49353.7	64283.8	41223.4	48459.3	78809.8	78824.9	133477	168872	101689	48486.1	126595	102488	143740	59615.4	86012.7	103690	33110.4	159045	149487	201227	102161	102065	142797	41932.1	235958	42978.2	249064	66485.4	262252	171347	107183
M231T199_1			230.551	198.988			4224.88	465.701	2298.42	2333.19	2372.91	2339.02	1329.34	16607.4	15051	23817.5	13862.8	15994.6	17066.7	3913.51	31163.5	21824.6	22565	40231.5	9944.33	25145.8	11319.9	515.187	672.066	802.093	498.172	8531.28	2203.76	3539.37	36889.4	25725.1	32369.7	32520.6	9479.48	27396.9	10781	8300.63	10023.8	6904.27	12353.2	8636.9	9243.75	2062.03
M303T83			303.096	82.809			42512.7	11397.6	24008.2	23069.1	25681.6	25333.8	11139.3	32604.3	30354.5	42430.5	26872.9	41976.9	34847.8	7020.38	31846.5	39112.5	29653.2	28048.1	25783.1	30888.7	5104.17	37483.6	25638.6	36616.2	65772.2	46737.4	42449.6	15030.2	17973.6	15903.8	15212.4	13987.9	6507.67	13917.1	4387.06	2518.85	5425.17	5495.41	1803.3	1234.31	3295.41	2028.14
M598T397			597.51	397.491			17685.7	25871.1	22720.8	27012.8	23606.8	23379.4	3616.42	9385.62	20230.9	16656.3	18409	9483.41	14833.1	5087.78	12095.5	6308.13	22874.4	8641.61	61362	22256.3	22762.8	75432.9	116836	78085.4	255354	287843	162710	101395	177393	97535.8	122957	235153	200329	166674	56187.4	42790.2	255594	21130.2	54417.9	152056	105198	97922.6
M621T395			620.979	395.098			414.012	949.943	2380.52	2307.95	388.155	1288.12	990.172	498.412	1651.62	425.222	1614.25	1489.44	1135.79	618.715	870.082	278.952	1963.97	1130.83	1037.52	1056.27	605.955	14628	6173.36	7709.51	8921.43	2838.57	8054.17	4325.11	7242.42	10210.5	6970.34	5462.67	6632.62	7303.71	1760.98	1424.76	423.052	402.279	1283.84	299.739	766.735	540.701
M371T378			371.277	378.247			4690.79	6953.71	8499.51	9152.54	13046.1	8468.53	3081.76	6434.24	6930	10470.8	8294.66	14666.9	9359.3	3353.97	6582.87	5006.89	7924.83	11137.5	5115.14	7153.45	2527.64	31907.8	56613.2	110581	87129.8	41504.4	65547.3	32723.8	11423.8	11910.2	12144.8	29875.6	51890.3	23448.9	17718.2	59904.6	25112.4	108224	20144.4	24622	47601.4	37463.7
M393T466			393.298	465.705			6882.07	6570.02	9305.88	5493.1	7137.44	7077.7	1394.21	7110.83	7028.92	25011.5	5984.3	4933.74	10013.9	8430.77	4673.56	5372.37	3836.96	5124.18	2885.61	4378.54	1018.93	23690.4	11374.5	38119.7	8995.6	5584.23	17552.9	13372.7	2856.84	4633.13	5800.57	4828.45	7813.47	5186.49	1812.44	3147.34	173296	7456.99	244365	143881	114429	106116
M622T423			621.52	422.717			110481	113495	96199.2	98392.9	136445	111003	16062.1	106141	105207	170186	73581.4	123173	115658	35355.5	53159.8	136589	115332	94096.6	146630	109161	37273.9	163365	168283	177991	270276	325064	220996	72815	240755	206572	265895	301293	227207	248344	36609.1	160600	90108	112557	74270.9	62383.5	99983.8	38745.5
M160T48			160.076	47.667			168898	71419.9	74956.9	59900.6	62840.8	87603.3	45856.6	105288	83640.2	80064	86971.6	81339.4	87460.6	10305.6	142669	108293	106922	114703	88152.2	112148	19723.2	184941	151997	187966	81829.5	46585.4	130664	63518.8	116353	101257	130693	101985	110217	112101	12116.2	39333.1	46767.8	39723.7	46830.2	36603.1	41851.6	4673.66
M346T477			346.308	476.893			3699.44	1656.18	21242	33092	15109.3	14959.8	12961.9	10446.7	11233.4	2020.4	6284.5	17466.1	9490.22	5780.21	28179.8	6553.21	9332.07	145829	919.392	38162.7	61051.6	722.907	625.096	571.933	850.156	938.422	741.703	152.67	831.706	731.928	741.551	805.852	701.365	762.48	54.2673	912.841	760.332	829.187	622.43	640.836	753.125	123.528
M317T175			317.12	174.916			18829.8	7517.99	6066.01	6614.17	11704.1	10146.4	5335.31	25379.2	24454.4	30851.2	18282.3	32237.9	26241	5578.83	22987.7	27155.4	27049.5	18909.4	15501.9	22320.8	5106.7	14468.7	7110.3	11518	28240.3	17622	15791.8	7963.99	58221.9	48456.7	46032.1	61451.8	26053.4	48043.2	13884.9	83347.3	84118.6	75603.3	74158	84507.7	80346.9	5033.5
M352T309_1			351.716	309.452			14695.1	19012.1	30243.1	30402.3	22980.3	23466.6	6910.9	2021.26	1989.55	2363.54	2326.63	2415.84	2223.36	201.787	2434.18	1480.77	3312.45	15015.8	2052.77	4859.2	5716.65	63059.5	60239.1	57500.8	69286.3	76157	65248.5	7503.55	95351.5	78939.2	79012.5	76868.4	65547.7	79143.9	10639.3	31425	28327.3	21312.8	25762.8	23558.2	26077.2	3962.51
M160T45_2			160.108	45.3885			162641	43140.1	50066.6	50477.1	1075.93	61480.1	60145.4	1202.29	82667.4	2014.34	1427.1	71624.2	31787.1	41591.4	2384.58	93146.3	1400.6	3086.96	78557.9	35715.3	46062.1	1265.51	99090	737.211	1513.2	2949.03	21111	43599.3	6951.19	6932.95	6957.6	7231.85	4222.23	6459.16	1256.58	6745.22	7564.18	7696.33	8452.11	9162.59	7924.08	919.762
M324T240			324.096	239.621			1121.97	986.652	8311.76	7062.14	3109	4118.31	3393.2	4591.63	2930.12	4966.76	2665.71	5539	4138.64	1272.99	11285.6	10102.5	9382.46	15804.7	1866.44	9688.34	5035.08	1312.54	1404.93	1645.95	1550.77	2523.55	1687.55	484.728	46498.1	34993.7	44355	46413.1	24748.2	39401.6	9463.22	14230	16084.3	9947.65	14459.3	12108	13365.9	2376.91
M634T532			633.556	531.82			35467.8	474.216	17307.7	14746.3	18469.9	17293.2	12460.6	20543.8	49552.4	27906	38019.2	16726.2	30549.5	13370.6	25894.3	31911.7	59437.9	14036.4	40770	34410.1	17034.4	68476.5	56744.9	55603.1	121777	44302.5	69380.8	30514.6	70333.9	72420.5	58734.4	67686.7	118017	77438.6	23276.8	19550.7	13143.6	12143.2	8920.83	6835.41	12118.7	4858.63
M238T110			238.108	109.762			2502.65	1806.28	1532.38	1919.1	2005.14	1953.11	355.117	28416.9	20881.6	23034.8	12302.9	28672	22661.6	6705.57	57969.5	46512.8	33542.5	554.208	15550.5	30825.9	23129.8	2602.33	2756.51	325.937	2622.7	4452.5	2552	1467.7	83669	1027.09	73598.2	60987.2	2505.81	44357.5	39705.3	3406.62	35795.6	4262.49	3566.03	4358.74	10277.9	14270.9
M198T386			197.617	386.495			3470.57	4679.19	5840.51	5862.39	3415.86	4653.7	1204.38	6380.05	19499.3	4910.98	11204	13750.5	11149	5876.97	11128.1	5791.15	18970.1	12084.1	18750.8	13344.9	5577.4	9518.25	13387.5	13731.7	14592.8	18638.3	13973.7	3255.57	22268.5	16891	21191.1	18728.3	24301.2	20676	2918.18	85781	82833.1	90485.3	73492.3	81337.4	82785.8	6259.42
M287T345			287.16	345.067			20210.4	26287	31888.4	23776.5	22204.9	24873.4	4507.64	2296.95	1822.32	3677.05	3680.58	4709.66	3237.32	1166.63	3835.8	4556.74	2704.78	16437	2117.44	5930.35	5949.91	25916.5	34565.5	29407.3	27922.2	25563	28674.9	3643.28	37617.3	38482.8	32886.1	35881.5	47173.4	38408.2	5346.44	12418.4	11829.2	8868.33	6759.22	7305.21	9436.08	2581.18
M329T421			329.269	421.421			22334.6	21828.9	15821	22243.6	27404.4	21926.5	4109.78	19496.5	39948.3	35539.7	19946	37666.4	30519.4	9981.09	32894.1	27254.7	44548.2	40289.6	46331.9	38263.7	8042.48	99951.7	111769	100193	179525	69746.6	112237	40710.4	122350	102345	132499	236054	81288.4	134907	59852.9	261117	71391.8	467981	43239.4	76843	184114	180672
M528T367			528.286	367.336			12187.9	15690.9	16917.5	19075.9	14900.9	15754.6	2541.54	10042.2	18516.8	8567.05	15154.6	13719.2	13200	3993.55	11647.8	7205.11	18399.4	9507.35	18404	13032.7	5146.82	136590	93599.3	102269	63208.2	54973.4	90128	32706	93985.4	117245	107803	82404	68779.7	94043.4	19373.7	30541.8	21479.8	17877.1	37068.1	15759.2	24545.2	8997.7
M769T501			768.562	500.899			5762.02	14373.2	6504.59	6601.48	4862.19	7620.7	3838.78	4520.93	14515.3	3492.89	6869.05	3881.34	6655.91	4584.68	5041.45	3205.93	11502.4	2050.69	16904.1	7740.91	6291.76	37134.7	90200.3	35322.2	78802.4	75199.7	63331.9	25362	73158.5	48746.3	61192.2	88849.1	122595	78908.1	28565.6	6970.43	3652.03	3888.9	1624.94	1256.78	3478.62	2278.37
M386T277			386.309	276.77			8130.55	5689.46	6761.92	10946.7	8331.89	7972.11	1979.77	5846.64	7858.18	8599.11	7382.38	8185.74	7574.41	1063.76	7416.71	5443.11	11363.5	8627.42	19277.7	10425.7	5393.33	77520.5	53385.8	71614.1	75740.8	103224	76297.1	17844.7	70345.5	68001.5	85898.4	89605.9	31214.1	69013.1	23134.1	19170.4	11645	8340.09	22369.4	11969.1	14698.8	5831.9
M598T422			597.52	421.588			179713	236487	185537	174584	226977	200660	28825.3	194426	147842	357238	160479	214055	214808	83872.4	114433	192240	217052	133742	215153	174524	47558.6	243184	210061	260685	224201	325845	252795	45096.4	305769	300869	421041	373987	236605	327654	71334	301344	403553	301899	244112	327310	315644	57823.7
M268T44			268.105	44.4			115599	106080	103727	122873	130570	115770	11274.3	78651.8	71070.4	100346	85679.6	92360.5	85621.6	11429.4	99308.3	78084.9	94495.7	106133	113916	98387.7	13503.1	221449	148532	202076	235720	274664	216488	46380.6	270128	252023	261226	232312	206303	244399	25498.3	210606	200113	203026	210561	205007	205862	4648.1
M653T416			652.56	415.808			151346	115967	106697	126942	89929.7	118177	22976.1	74278.5	130569	48840.8	113822	96998	92901.5	32254.5	136879	75689.3	133496	97747.4	151155	118993	31189.8	200641	260060	207814	288229	249415	241232	36723.8	271329	236764	259073	268536	280536	263248	16665.7	221542	227259	145223	173235	162231	185898	36593.1
M324T345			324.327	344.919			5450.33	18611.7	12723.7	95130.7	34208	33224.9	36189	8390.22	2107.67	2141.69	2887.02	5311.1	4167.54	2698.41	7057.12	4250.3	7062.14	18863.6	4706.14	8387.85	5998.81	3025.79	1668.8	2285.42	22367.5	17212	9311.91	9748.9	5412.59	7706.76	27569.4	8602.87	4459.67	10750.2	9550.11	6510.02	8240.95	11283.3	4382.3	2076.84	6498.69	3534.13
M259T107			259.07	106.794			17762.7	8371.01	12183.3	10006.3	11743.9	12013.4	3551.46	21002.1	20182.9	49023.7	40035.9	31192.7	32287.5	12401.8	30701.6	21796.4	33046.2	36012.4	27992.1	29909.7	5413.21	5359.03	5049.5	6224.59	8282.12	13412.9	7665.63	3451.54	21512.4	46810.5	24645.6	26144.4	28479.9	29518.6	9991.48	11658.4	13774	11375.9	12737.4	13150.2	12539.2	1008.26
M415T316			415.353	316.04			14937.7	21326	29236.6	30073.7	23688.9	23852.6	6196.27	20872.3	23081.2	20693.1	21129.3	19677.5	21090.7	1241.62	21483.8	13893.7	19866.6	17625.2	32924.5	21158.8	7167.22	126965	77449.6	80137.3	126100	56533.1	93437	31564.9	83403.6	96159.2	80167.2	105629	52932.9	83658.4	19970.5	27278	15726.4	9699.18	24571.1	16230.5	18701	7141.57
M343T414			343.285	414.319			7350.52	12416.3	9987.99	15044.9	5879.42	10135.8	3714.71	21629.9	56414.4	25355.9	32404.5	51945.6	37550	15745.8	27530.2	15745.7	48205.4	40002.9	49758.5	36248.5	14456.4	12674.6	17835.5	21617.6	20734.1	22564.6	19085.3	3996.74	21639.3	29760.8	43500	15446.9	29890	28047.4	10546.9	179062	35215.5	485223	9600.2	4345.16	142689	204362
M728T569			727.566	568.519			8655.42	26149.8	2901.71	973.44	9721.55	9680.38	9925.41	27420.9	37651.2	23146.6	28636.1	16059.8	26582.9	7905.19	18040.1	23236.3	33835.5	4249.87	47500.4	25372.4	16323	9498.63	15924.5	12630	13655.6	14036.1	13149	2363.34	45711.7	33860.5	52479.1	68188	60289.5	52105.7	13224.3	57826.5	44791.4	39938.1	36011	35771.4	42867.7	9129.9
M211T139			211.094	138.741			931.712	5746.34	267400	209222	1949.32	97050	130596	1802.62	235970	184209	232829	180779	167118	96003.1	273574	11973.5	183554	238123	197331	180911	100842	6647.07	7014.21	10262.1	3836.25	708371	147226	313698	693893	4192.81	4097.32	2394.54	4363.77	141788	308637	4496.13	4145.02	680217	3364.74	5551.12	139555	302240
M303T123			303.134	123.179			13810	21194.6	29520.2	23932.7	16064.6	20904.4	6269.8	31605.6	21983.3	31130.3	32317.9	27627.4	28932.9	4284.62	20828.3	21049.3	19117.5	19239.6	11497.9	18346.5	3929.35	52234.3	27638.4	28171.9	72905.8	43739.3	44937.9	18823.2	60240.2	69477.1	73740.9	51555.8	52130	61428.8	10021.5	22032.5	22907.5	17613	21858.6	16052	20092.7	3052.88
M255T394_2			255.233	393.773			31093.9	73554.3	93878.7	77133.5	67758.2	68683.7	23150.4	44090.1	38283	42086.7	52162.7	41666	43657.7	5192.4	47229.6	34159.7	40643.9	34232.7	26500.9	36553.4	7792.34	133834	64207.4	70178.7	133023	51353	90519.2	39758	101466	131609	101423	94761.6	92552.5	104362	15740.4	26940.5	62192	61498.7	23782.4	31491.8	41181.1	19063.4
M694T393			693.577	392.799			4593.32	5228.57	4294.54	6434.59	3917.54	4893.71	985.977	1733.92	3107.29	2373.98	2102.6	1735.73	2210.7	569.022	1575.01	1344.64	2083.94	1552.26	8510.06	3013.18	3084.87	61463.9	25233.5	27657.9	71097.4	27867.2	42664	21850.9	9634.89	9663.35	7541.52	13385.5	11675.6	10380.2	2226.97	3091.19	8429.88	2156.06	3013.49	24079.7	8154.07	9243.06
M357T449			357.291	448.538			2620.42	3255.62	3870.72	3264.26	2691.56	3140.52	508.386	3452.74	3873.81	3186.96	2674.33	743.83	2786.34	1221.84	2281.58	6962.64	46291.7	3636.19	7727.68	13380	18536.7	5619.13	3600.28	5674.09	5238.34	3607.62	4747.89	1057.67	4117.31	201540	14914.8	10520	113967	69012	86810	4076.18	1374.76	2564.39	2838.3	1295.8	2429.89	1150.5
M664T508			664.491	507.651			2608.88	1686.75	2276.91	1979.55	1604.08	2031.23	417.679	1902.01	2100.98	2306.98	1897.46	2486.47	2138.78	257.345	2040.69	1613.43	1994.8	3085.45	10364.4	3819.76	3699.17	7693.76	7654.56	8572.27	4217.1	2764.06	6180.35	2535.27	3114.45	8801.12	8220.17	3724.68	5225.6	5817.2	2584.16	53957.4	69100.9	40297.3	72561.3	85333.7	64250.1	17441.3
M334T58			334.151	58.016			3039.36	794.181	1124.05	412.461	474.987	1169.01	1083.37	3244.31	2424.88	13436.9	3135.1	2810.67	5010.36	4721.35	8236.08	10704.3	7151.72	7870.5	3030.43	7398.6	2783.58	4086.91	2287.75	2795.7	5949.02	1987.97	3421.47	1625.05	23052.3	138298	23912.3	26120.1	71195.8	56515.8	50026.4	17377.9	15573	19216.5	18950.9	14539.5	17131.6	2053.38
M318T404			318.232	403.945			11772.9	30569.4	53369.7	32649.1	40764.4	33825.1	15235.1	23672.7	4781.25	15973	20859.6	9753.57	15008	7785.32	1055.51	23371.3	6186.05	8459.38	974.059	8009.26	9183.79	12030.9	1077.39	1657.34	4617.09	1277.83	4132.11	4642.98	1862.89	6106.33	3211.68	325.249	842.777	2469.79	2312.43	2523.96	5114.93	2979.63	7826.08	5524.24	4793.77	2137.45
M655T428			654.576	428.119			140967	175527	178041	175175	192604	172463	19010.1	130383	222238	111066	152797	156879	154673	42026.8	160345	104213	150205	91887.6	145340	130398	30336	255557	346838	262724	256246	284824	281238	38545.9	295089	231649	231503	253020	269495	256151	26980.9	258386	86160.8	136019	287728	61908.4	166040	101810
M263T116			263.103	116.064			66231	13559.9	32112.2	36228.4	35775.6	36781.4	18905.3	44660.4	48661.5	107161	60611.4	49143.5	62047.7	25910.1	53608.7	54019.8	44734.9	40966.4	33213.1	45308.6	8807.12	11797.9	22789.4	16731	21131	17354	17960.7	4278.65	10663.3	13991.2	10376.9	10385.4	6808.22	10445	2542.52	5931.88	5343.58	5121.45	6309.29	5834.37	5708.11	475.52
M132T43			132.066	43.372			7318.79	116322	125736	124524	105455	95871.3	50161.1	72753.3	87468.3	128186	128107	131539	109611	27462.5	54261	93887.5	99013.4	82886.8	198937	105797	54871.8	89743.7	84379.2	62678.5	49524.2	120261	81317.3	27180.8	136061	124742	114558	141025	153237	133925	14893.9	56131.6	61977.7	62825.8	71069.5	60696.8	62540.3	5422.53
M362T446			362.303	446.218			2696.89	7288.79	4799.44	43012.5	74648	26489.1	31612.7	6117.56	2661.12	1910.55	2328.38	5624.29	3728.38	1981.55	5769.17	4959.67	6512.98	20540.4	1244.05	7805.26	7401.81	1336.52	1956.84	2530.26	6618	6243.75	3737.08	2498.57	5866.82	10761.9	50216.7	10937.1	3294.19	16215.4	19285.6	8427.43	15468	13790.1	6961.49	849.034	9099.21	5823.49
M303T274			303.132	273.705			29612.4	1409.32	1167.18	1303.97	2756.89	7249.95	12517.3	11724.9	4655.92	5177.92	2301.92	4608.86	5693.9	3549.62	25132.4	31329.9	13881.3	28343.1	4088.01	20555	11329.2	46550.2	18342.3	28327.5	116891	51740.4	52370.2	38513.3	127283	84458.1	121323	129568	37318	99990.1	39509.2	45610.6	54894.1	38099	44865.8	37274.9	44148.9	7105.68
M234T51_2			234.132	51.002			8116.34	1355.11	5088.3	5144.59	3654.15	4671.7	2464.65	960.111	1505.3	1381.33	2241.32	2016.95	1621	512.145	2482.26	3956.55	1919.65	4676.11	6479.52	3902.82	1815.99	32889.5	23898.7	33833.7	21419.7	28761.4	28160.6	5443.15	4589.7	5018.12	4693.29	3454.34	1342.85	3819.66	1505.04	3285.18	2732.98	3091.62	3787.64	3614.2	3302.33	418.819
M347T413			347.261	413.047			3887.86	2672	2892.14	3539.6	5300.59	3658.44	1039.68	3689.31	5445.08	2258.92	2578.27	6088.09	4011.93	1702.71	4539.02	6589.01	5322.72	5432.63	5778.28	5532.33	744.58	4273.39	4681.12	4308.51	602.16	5770.37	3927.11	1954.92	3464.92	2990.82	4757.53	7445.64	5725.31	4876.84	1794.68	22292.5	165012	36410.2	27703.9	167611	83806	75490.8
M694T414			693.577	414.3			47601.6	63196.1	60766.8	63532.3	59861.2	58991.6	6556.22	39892.2	69362.1	39950	53420.3	44747.4	49474.4	12409.4	38605.5	40478.7	59693	41560.4	72265.4	50520.6	14832.9	125207	141104	121341	176522	144656	141766	21841	162488	158176	150800	167931	269392	181757	49388	197945	193118	127110	118274	114886	150267	41596.4
M722T421			721.507	420.69			5861.65	4355.73	4924.72	9306.82	14614.2	7812.62	4260	7903.36	8627.32	89964.4	7463.97	12088.4	25209.5	36244.8	5719.76	8530.63	6673.24	9298.55	3079.77	6660.39	2457.82	4488.63	3332.55	4941.98	3568.08	3141.69	3894.58	780.906	2765.92	3132.25	5594.93	8113.12	4299.51	4781.14	2166.58	2244.89	3424.87	6168.15	6050.12	3651.51	4307.91	1729.34
M258T312			258.28	312.05			9048.89	51988.5	42387.7	120025	3023.83	45294.7	46739.8	12705.7	8657.02	1934.21	4498.38	33053	12169.7	12372.9	9193.89	3066.36	13320.1	44017.3	3733.13	14666.2	16936.2	2550.43	1661.2	4737.64	15549.2	34098.3	11719.3	13688.2	16543.3	21250.8	56484.2	7019.79	5532.02	21366	20694.7	7740.38	22465.5	22808.3	6796.13	4356.77	12833.4	9034.88
M327T367			327.252	366.807			15942.8	27790.1	23620.6	20686	22361.7	22080.3	4320.48	7157.02	2478.08	5355.64	8682.61	13412.6	7417.18	4069.96	6800.67	7623.87	5163.14	13139.1	3795.95	7304.54	3580.98	19885.8	35262.9	25807.6	17476.8	64225.3	32531.7	18998.2	20092.4	18808.9	22537.2	22539.7	36076.5	24011	6934.17	21888.5	166544	36555	31498.2	210020	93301	88214.5
M492T350			492.332	349.884			12051.3	23097.7	25958.7	24340.7	12646.5	19619	6717.02	24091.8	20984.3	26296.1	22894.5	23302	23513.7	1930.15	25036.6	27543.3	31706.2	29626	25208.3	27824.1	2872.65	56699.6	50294.8	41946.4	182824	75332.1	81419.4	58004.1	126839	108966	121094	118371	170381	129130	23947	46396	44964.7	42846.4	47821	45033.1	45412.2	1850.49
M127T61			127.039	60.737			1302.76	25817.8	1254.94	18459.7	4672.33	10301.5	11200.6	26885.9	1230.99	6689.55	1856.57	17752.2	10883.1	11129.9	1596.89	20614.9	3765.82	2150.82	6545.66	6934.83	7885.42	19716.5	8104.5	8016.94	41929.5	114339	38421.3	44635.2	9773.27	10337.9	8284.26	15550.5	25432.8	13875.7	7017.52	40381.4	52333.6	66010.2	60268.8	148171	73432.9	42871
M303T389_2			303.254	388.76			2615.43	4025.72	4328.13	4814.19	1295.27	3415.75	1440.23	3139.11	7693.08	3269.49	4434.33	5123.8	4731.96	1849.75	4775.44	2776.54	8749.99	7017.67	10456.7	6755.28	3061.81	29284.3	29950.8	31137.5	50292.9	41582.5	36449.6	9216.52	66544.4	41270.2	59645.4	75941.3	59774.7	60635.2	12707.5	114564	91737.7	94761.6	54114	66315.6	84298.6	24058.8
M337T387			337.235	387.391			6540.56	5606.41	3795.09	6905.81	2974.55	5164.48	1716.99	6876.27	17662.9	7187.13	10122.4	11873.8	10744.5	4391.59	9312.49	5355.87	17742.8	11409.2	28499.3	14463.9	9035.61	19869.6	23188.9	22211.4	29985.4	44709.5	27992.9	10073.6	58423.1	36262.6	50650.9	55709.5	66858.6	53581	11322.4	302488	9814.74	272316	18183	4321.7	121425	151971
M567T504			567.489	503.805			3419.71	5216.59	4545.02	4628.58	3119.26	4185.83	882.045	3096.37	4232.82	1448.2	4274.92	3803.78	3371.22	1174.7	2933.86	2138.46	4548.16	2661.82	4748.37	3406.13	1171.52	5609.49	10644.9	8835.36	11298.4	7876.48	8852.92	2272.94	9401.92	8425.75	7952.5	8690.28	11094.7	9113.03	1225.6	4692.7	2894.18	3750.34	11619.2	3117.14	5214.71	3647.57
M329T369			329.269	369.461			17939.5	9590.43	18576.9	19898.6	21773.6	17555.8	4688.17	14265.3	18383.6	17115.8	15444.3	14094.4	15860.7	1856.01	12596.8	12236.3	20251.4	10355.4	24792.1	16046.4	6184.1	72796.3	89325.4	130002	43350.9	56531.1	78401.2	33616.4	62192.7	87563.5	52017.1	59406.4	45648.5	61365.7	16009.9	19582.7	21643.8	10752.7	15655.9	31374.9	19802	7688.53
M333T405			333.238	404.864			73585.8	112399	104702	100930	71869.4	92697.1	18702.2	78952.7	61682.1	51450.2	90716	74592.4	71478.7	15270.4	103105	82196.6	68615.8	84104.5	30111.9	73626.7	27252.6	66571.7	24099.2	36470.7	32146.5	8294.03	33516.4	21378.2	31441.6	51532.9	40734.5	15672.9	17049.7	31286.3	15375.9	5927.11	2835.93	5564.89	5441.45	2615.69	4477.02	1610.44
M326T390			326.239	390.174			3690.03	2137.17	2389.89	2131.82	2956.83	2661.15	666.021	1245.18	3954.92	1924.44	2642.36	3176.67	2588.71	1056.11	2205.86	1041.3	4993.77	2964.75	5973.33	3435.8	2020.8	8896.47	12657.6	11992.2	11227.5	15689.9	12092.7	2461.37	20681.1	15991.9	16158.5	20588	25931.4	19870.2	4084.4	71981.4	1479.06	65967.9	3717.65	1616.22	28952.4	36607.7
M340T311			340.143	310.896			17763.3	20170.9	24329.2	23716.3	17659.3	20727.8	3178.65	2347.02	2283.5	2051.92	1902.03	2565.24	2229.94	258.949	1888.21	1567.73	2294.81	14681.7	1723.57	4431.2	5736.6	19081.8	16795.7	20780.6	15166.4	16968.6	17758.6	2188.27	17605.6	18729.2	14911.1	15301.8	18297.5	16969	1752.36	4541.8	4163.92	2887.89	3483.13	2914.79	3598.3	740.819
M353T433			353.269	432.869			27611.3	19250	17509.8	15770.2	22534.8	20535.2	4679.19	12083.1	4680.16	14075.2	10689.3	6958.37	9697.22	3824.77	40573.6	23750.9	15182.5	63731.9	6928.5	30033.5	22586.2	42289.8	7662.23	11119.3	4729.7	41732	21506.6	18854.9	3797.65	10113.3	20243.4	29344.4	64938.5	25687.4	24007.1	44305	8361.6	45235.8	6351.71	19943.7	24839.6	18922.2
M180T279			180.136	279.251			2754.2	3283.05	3842.91	7501.15	16639	6804.06	5804.73	49099.4	8182.71	2466.45	10410.7	61845.8	26401	27074	6075.51	6627.91	14917.9	27742.3	2965.59	11665.8	10016.9	8178.38	7978.83	8180.94	5106.3	9154.88	7719.87	1531.33	7517.16	8422.72	8781.14	9059.59	7771.55	8310.43	654.808	13037.6	11774.9	11694.1	10683.2	9616.32	11361.2	1284.19
M177T50			177.065	49.869			3184.4	4817.68	4686.34	4002.8	6252.59	4588.76	1134.22	5496.89	6086.77	10485	6154.3	5571.96	6758.98	2103.71	7024.12	12655.2	24259.7	3501.3	41054.1	17698.9	15243.6	3713.94	3207.28	4313.15	3737.29	3381.14	3670.56	423.571	3975.45	4354.92	4086.92	3704.31	4860.01	4196.32	438.311	3723.72	3797.7	3229.8	3900.39	3379.95	3606.31	287.182
M383T360			383.29	360.157			1459.64	1119.39	1283.35	1926.76	1569.68	1471.76	306.767	1382.82	1193.97	726.033	854.287	2484.59	1328.34	697.394	875.401	1119.58	1128.33	1277.29	667.704	1013.66	241.18	3259.39	897.983	3114.5	3487.73	998.727	2351.66	1288.42	1324.94	1910.73	1732.21	1464.93	1919.1	1670.38	266.925	53130	50198.5	39507.8	59107.1	50246.2	50437.9	7105.69
M205T407_1			204.625	407.099			87354.6	97229.2	71848.4	85273.4	19451.1	72231.4	30861	71922.1	172232	57766.3	91057.8	137526	106101	47674.8	47888.9	65311.1	150433	158220	191051	122581	62435.5	77878.8	128192	144698	10276.1	90154.1	90239.8	52328.5	161100	95012.1	160687	74569.7	104284	119131	39611.3	129726	14639.5	139359	22078	7160.17	62592.4	65980.2
M351T393_3			351.207	393.45			1875.53	36843.9	1797.87	2083.06	2550.88	9030.25	15551.1	3617.87	1609.9	1658.45	1540.15	1462.74	1977.82	919.781	1077.87	603.565	754.506	1740.41	417.162	918.701	519.217	3524.19	3870.47	4624.82	1989.43	2248.7	3251.52	1111.52	2459.61	2849.51	2640.89	1754.36	2155.7	2372.02	429.03	1139.54	90101.4	1667.32	1465.13	710092	160893	309404
M219T427			218.641	427.088			14763.5	22765.6	18344.2	20527.4	8817.63	17043.7	5464.32	27011.2	45233.5	23346.5	32712	33264.5	32313.5	8314.29	41744.5	26638.7	46864.6	67060	55092.2	47480	15074.4	17352.6	16328.7	27652.7	7251.29	8832.02	15483.5	8128.8	34347.2	28936.1	43631.2	14901.4	12773.2	26917.8	13067.8	64497.1	7926.63	72131.2	9495.44	3569.73	31524	33762.8
M399T402_1			399.217	401.842			3496.91	3295.45	2103.97	2975.96	1878.45	2750.15	721.702	3926.97	3682.97	2334.44	3333.03	4144.27	3484.33	709.937	584.36	3132.9	3141.48	1876.89	2726.86	2292.5	1084.69	51312.9	34989.7	73527.2	887.583	951.729	32333.8	31772.1	810.437	968.718	840.288	646.558	631.454	779.491	141.463	828.547	1371.22	1102.21	1698.54	1252.85	1250.67	322.237
M455T305			455.359	304.891			550.996	883.143	1544.3	1757.59	1228	1192.81	487.745	1168.84	679.267	1662.3	1251.66	863.142	1125.04	378.781	1723.23	953.093	1523.57	1941.37	1718.23	1571.9	376.192	81971.1	40490	43103.2	64593.8	49560.5	55943.7	17296.6	65359.7	79779	58692.5	65059.8	30079.1	59794	18318.6	13722.2	8575.46	5514.16	16696.4	8180.38	10537.7	4547.35
M629T444			628.56	444.104			8402.45	22138.2	9408.37	20337.7	21343.1	16326	6813.28	17715.5	10820.5	10247.7	17181.9	22003	15593.7	4986.66	6338.48	12548.3	27435.3	11853.4	29941.1	17623.3	10421.1	20091.3	64708	67449.8	40857.2	18677	42356.7	23387.9	64980.1	67737.7	33833.6	66022.6	15863.5	49687.5	23568.6	87982.8	139603	72532.7	50788.4	92935.5	88768.4	32818.4
M366T370			366.204	369.928			4769.73	3832.67	4348.58	4647.35	4480.58	4415.78	363.193	1390.84	1839.58	1380.51	2547.61	808.354	1593.38	646.872	1100.57	1030.36	1303.32	2203.6	1485.94	1424.76	470.565	10201.6	26394.9	6196.45	79544.8	19965.5	28460.7	29644.2	61243.5	107839	59621.1	67400.2	31860.1	65592.7	27296.8	8961.96	7169.72	4979.22	9584.86	2667.62	6672.68	2866.92
M276T396			276.262	395.669			2992.42	5388.76	4692.54	11039.5	6425.2	6107.68	3026.87	7807.46	4292.81	6590.64	6470.53	13960	7824.29	3656.29	4375.23	4576.41	6263.18	10665.1	2777.27	5731.45	3021.78	30081.3	63680	38176.3	54648.8	17129.4	40743.2	18690.5	10577.9	10376.6	26479.6	30724.4	63733.5	28378.4	21794.6	53430.2	103154	94925.3	36921.1	90747.5	75835.6	28937
M119T162			119.061	161.803			10602.6	7279.19	7378.93	13140.3	5956.23	8871.45	2936.05	19586.2	12695.4	17769.5	16395.4	10479.9	15385.3	3729.97	30729	30091.3	22063.3	32282.4	11351	25303.4	8749.8	11901.5	27850.1	20862.9	31301.7	23582.3	23099.7	7424.22	60430.1	67089.3	58886.4	57849.6	66208.1	62092.7	4270.57	38402.5	31876.6	32140	42650.7	36188.6	36251.7	4517.29
M330T209			330.109	208.553			1569.48	1084.07	1238.29	1319.36	1522.09	1346.66	201.164	7211.55	6129.51	7324.76	5179.59	9922.85	7153.65	1778.12	17492.3	15881.7	15011.2	24494.2	8083.51	16192.6	5870.59	1977.3	1636.36	2407.98	2561.39	2439.23	2204.45	386.742	11387.4	22993.6	9751	9858.1	7787.93	12355.6	6082.54	2768.64	4227.73	2548.93	4926.17	3571.81	3608.66	993.619
M514T361			514.307	361.113			37486.1	33671.8	72616.6	65081.4	42394.3	50250	17462.1	24955.9	12805.9	35837.2	23960.1	23692.8	24250.4	8156.62	64423	16234.7	24373.8	22907.5	12667.6	28121.3	20851.6	93418.5	37163.8	26963.1	41698.6	76575.3	55163.9	28383.4	38640.4	48967	45805.4	80134.7	78270.4	58363.6	19398.9	11297.3	5254.12	7166.69	8477.24	4584.99	7356.08	2689.03
M253T75			253.074	75.149			11625.8	2746.48	2453.16	2033.36	4231.29	4618.02	4004	14412.1	15466.5	16423.8	15152.3	18926.2	16076.2	1749.11	29386.7	15672.1	22075.3	23441.5	15108.2	21136.8	5925.81	5192.61	3435.14	4639.38	3221.64	4928.06	4283.37	896.638	23905	21818	24552.6	24861.2	16484.1	22324.2	3473.61	7074.99	7871.89	6234.34	8059.82	6178.16	7083.84	882.544
M329T360			329.269	360.113			45756.7	81739.3	71003.5	63683.6	77955.4	68027.7	14232.8	48629.5	21284	63369	40764.2	42870.2	43383.4	15186	66064.8	43553.7	50980.4	36332.2	21973	43780.8	16428.1	163963	63384	59735.8	39296.6	104785	86232.9	49531	40544.5	61920.9	191162	90056	152689	107274	63059.4	12994.2	12135	27273.7	68678.4	18375.2	27891.3	23583.4
M512T395			512.416	394.522			13340.1	12373.2	15068	22416.5	25785.5	17796.7	5955.79	19197	25011.4	8445.53	19031.7	32747.4	20886.6	8927.06	11898.8	26525	15646.1	22841.5	9035.16	17189.3	7347.84	8475.27	9918.94	17285.9	11270.1	21545.5	13699.1	5520.62	6665.96	7683.98	19085.8	6403.1	9502.66	9868.31	5294.59	20839.4	287847	31065.2	24628.4	196104	112097	122974
M178T326			178.099	325.598			29778.4	31462.2	35312.9	35698.2	29889.6	32428.2	2890.22	13723.6	15377.9	14629.9	16637	18867.9	15847.3	1997.49	16291.1	10113.3	19228.6	18766.3	15970	16073.9	3632.77	52295.3	45604.4	57410.5	54586.6	41740.6	50327.5	6485.05	70834.6	70823	66852.3	58777.3	63470.5	66151.5	5143.24	62833.7	64639.5	59966.2	56784.2	58046	60453.9	3266.68
M245T107_2			245.036	107.13			2425.79	17009.9	11474.3	14646.7	13652.5	11841.8	5626.97	5935.33	5058.65	7771.24	6881.58	5916.72	6312.7	1039.57	5750.21	8601.59	14511.5	7010.91	10323.2	9239.48	3410.17	1738.68	1568.43	1635.29	1677.15	3457.06	2015.32	808.339	23036.2	17729.1	19570.2	20720	18178.1	19846.7	2137.79	8223.03	8992.79	6481.39	10132.8	8378.33	8441.67	1328.37
M310T51_2			310.115	50.561			15928.1	48894.9	53413.5	53511.8	33181.5	40986	16299.5	43967.8	40821.1	50521.6	46415.5	47554.8	45856.1	3670.22	67514.3	44600.1	48577.2	44743.6	51231.7	51333.4	9462.98	60366.5	45641.7	58116.1	202348	64877.4	86269.9	65280.1	113241	99789	104893	105932	117641	108299	7094.49	28215.4	25928.1	26379.2	24806.3	24896.2	26045.1	1386.54
M223T249_2			223.087	249.049			1055.74	1308.75	1113.59	1338.84	709.089	1105.2	252.704	1115.28	1242.52	1310.16	404.759	1394.51	1093.45	398.308	1282.15	1375.98	376.369	1902.2	1219.15	1231.17	548.791	2214.25	1265.95	1287.77	1474.47	1086.58	1465.8	440.368	31123.2	21921.5	18020	42132.4	31203.6	28880.1	9386.4	6497.74	4660.17	4981.09	4585.27	4036.75	4952.2	928.373
M425T375_3			425.275	374.515			8494.62	19199.2	30770.8	24765.2	10940.7	18834.1	9314.07	10635.8	4298.85	8963.7	13531.7	8888.48	9263.71	3353.32	5061.45	5175.22	5745.11	5662.36	4290.35	5186.9	582.525	86736.3	742.192	45078.5	113560	10226.5	51268.6	48512.4	110189	121849	426.261	80279.4	88444	80237.6	47607.3	12886	12504.7	10233.7	12758.5	12058.7	12088.3	1083.9
M472T375			472.257	374.689			16121.9	17977	18494	20470.6	19301.6	18473	1616.4	11011.8	15383.1	8663.39	17902.1	8793.46	12350.8	4124.81	5227.42	612.44	6533.65	4990.39	5410.29	4554.84	2282.11	59693.4	26108.4	43022.6	9909.6	1103.75	27967.5	23897.7	26083.7	46030.8	48108.6	25499	37295.9	36603.6	10673.5	1576.2	10380.6	1175.72	1737.32	1469.5	3267.87	3981.43
M367T352_2			367.368	351.513			1709.66	1176.58	1352.1	15658	98776.9	23734.7	42401.4	6707.09	2110.5	2126.4	804.775	7046.26	3759.01	2898.61	4602.17	3396.73	7807.08	15465.5	371.214	6328.54	5760.55	3274.84	962.634	5459.06	7795.87	3127.03	4123.89	2596.84	6294.03	4079.68	36275	8840.39	791.308	11256.1	14295.2	5202.7	6500.9	5802.39	3123.46	952.516	4316.39	2264.1
M391T165			391.14	165.339			6741.04	3988.74	2999.9	2452.23	3272.63	3890.91	1686.62	23970.9	16337.2	22408.7	5577.91	14547.7	16568.5	7311.55	22822.5	37519.2	26741	9088.57	7495.93	20733.4	12580.3	2473.61	2423.23	2586.34	6728.52	16571.4	6156.63	6104.2	29141.3	24907.3	23292.5	30582.8	16477	24880.2	5563.52	2924.63	2777.69	2452.26	2836.18	2707.08	2739.57	179.333
M448T454			448.306	453.788			95703.2	9954.13	2629.99	6771.02	12984.1	25608.5	39371.9	9088.35	19954.5	27602.8	35640.5	3878.29	19232.9	13023.6	48474.6	72375.6	39857.2	22056.1	23944	41341.5	20559.7	2452.39	9098.55	3651.05	255128	76568.2	69379.6	108383	6324.79	39982	19141.2	16197.7	121207	40570.5	46713.3	3292.59	523.98	6342.7	862.822	500.156	2304.45	2539.08
M391T256			391.177	256.172			42597.2	2089.7	2688.41	2545.01	5190.47	11022.2	17692.5	8256.06	5058.85	6331.97	2777.71	5941.15	5673.15	1996.13	24982.8	11711.4	16745.4	17116.2	3739.81	14859.1	7821.25	18252.5	5308.66	6400.53	82489.9	109140	44318.4	48212.8	79667.1	46675.1	80630.7	101780	22681.9	66287	31347.2	4863.58	6913.82	3762.99	5074.72	3360.33	4795.09	1387.05
M389T249			389.069	248.637			712.19	706.38	884.826	967.778	782.016	810.638	113.553	7807.49	9546.72	8132.4	8464.43	10223.8	8834.97	1015.14	4041.27	1879.21	6139.59	1128.62	3823.13	3402.36	1972.79	835.491	568.89	1265.42	810.783	1062.23	908.564	265.161	11677.4	11580	11301.6	13800.5	9328.67	11537.6	1587.21	5005.1	4602.04	4191.62	4266.04	4392.01	4491.36	326.599
M362T240			362.114	240.096			942.566	939.5	917.825	1051.8	1012.02	972.741	56.6214	628.162	887.964	2088.83	1022.12	713.999	1068.22	590.633	1347.79	2454.28	9799.37	2600.89	5208.28	4282.12	3393.95	1117.99	1231.67	1513.54	1901.57	1727.34	1498.42	328.268	11839.4	78077.6	13666.3	18728.3	70255.7	38513.5	32761.4	10011.9	7457.57	11017	8671.51	6918.48	8815.29	1713.28
M513T400_3			513.376	400.044			18404.4	22885.3	19704.3	29909.7	3751.47	18931	9584.63	18770.7	72227.8	14841.7	35904.8	45630.6	37475.1	23123.9	28567.4	11534.7	69582.5	59794.9	73637.2	48623.3	27237.8	65672.1	90891.4	94362	50068.8	46127.6	69424.4	22439.8	79040.2	73633.1	74347.2	40211.3	85596.1	70565.6	17626.9	120922	64127.6	118716	138921	16063.3	91750	50731.5
M415T379			415.303	378.55			2756.81	1732.4	3756.34	3959.01	9291.52	4299.22	2928.36	6117.53	4666.37	4626.55	3748.95	12603.2	6352.52	3596.07	3400.58	5798.79	4269.02	6877.58	3916.92	4852.58	1442.24	18406.5	31941.8	59680.6	42838.2	27129.2	35999.2	15907.7	12969.5	6440.22	10721.5	15153.6	26942.4	14445.4	7694.23	22585.1	45910.2	54972.4	18232.1	76556.7	43651.3	24010.2
M315T386			315.254	386.329			1749.82	2162.84	2064.13	1770.62	1224.15	1794.31	366.143	3094.37	8929.79	3423.43	4866.02	6320.18	5326.76	2386.8	4295.89	3353.04	8202.48	5662.37	11492.1	6601.17	3287.52	9807.11	9275.77	8338.67	17892.7	21151.7	13293.2	5825.61	28255.6	16470.9	26853.3	31410.2	28519	26301.8	5739.76	144897	20731.4	141030	31250.8	7598.51	69101.5	67958.8
M743T399			743.486	399.404			6165.39	4949.9	3200.66	5417.52	6854.03	5317.5	1387.98	5470.17	7034.54	71299.6	5515.29	7259.35	19315.8	29071.7	3023.95	3431.17	5067.04	4564.79	5516.1	4320.61	1062.83	6901.33	18180	6804.86	4843.23	5665.71	8479.03	5489.42	24063.9	5320.63	4354.26	26438.2	5719.84	13179.4	11063	1828.97	6371.91	4988.75	3355.79	3890.01	4087.09	1710.71
M357T342			357.375	342.039			995.175	5109.43	1822.56	34198.8	74595.3	23344.2	31779.2	4966.38	1474.01	2507.9	1024.6	2198.75	2434.33	1531.48	3877.18	4095.01	5383.84	9575.65	1040.16	4794.37	3107.75	4400.69	2548.97	3542.61	8614.92	6732.68	5167.98	2470.8	4624.72	10669.3	29498.1	11690.1	3856.48	12067.7	10353	4981.39	7304.37	9789.15	3334.35	2173.75	5516.6	3068.96
M354T403			354.253	403.489			6651.55	12262	10898.3	12115.2	6854.41	9756.3	2793.2	8016.88	6860.98	5575.79	9708.23	9057.35	7843.85	1664.98	11568	8402.68	7075.84	11435.9	6967.76	9090.04	2273.6	9562.83	6797.68	5420.26	4123.23	4094.2	5999.64	2281.48	8224.34	5759.12	4456.24	1129.58	6073.04	5128.46	2613.3	5618.58	108101	15454.4	96713.8	95671.2	64311.7	49453.8
M358T427			358.304	427.192			8298.43	11369.7	9495.5	11450.6	4439.64	9010.78	2879.02	13550.7	30241.3	18949.2	17701.9	22589.2	20606.5	6279.5	23762.7	15230.1	36781.5	49225.7	47631.2	34526.2	14841.6	16655.6	17694	19204.9	13170.6	12681.1	15881.2	2851.38	36763.9	30765	55971.8	24497.4	16668.1	32933.2	14881.8	147109	4177.05	231026	904.255	6212.99	77885.9	105759
M196T376			196.117	375.721			55463.6	69306.8	84150.2	66475	55425.3	66164.2	11866.9	50510.8	37289.1	44988.5	54477.4	42748.5	46002.9	6702.42	65357.2	50543.4	49607	59514.2	29554.4	50915.2	13607.4	70478.4	53441.9	65453.8	80881.5	44116.6	62874.4	14401	82401.6	86449.1	77330.8	65386.8	70696.9	76453.1	8539.21	32761.9	26656.3	19588.5	33333.8	24568.9	27381.9	5778.12
M352T391			352.18	391.378			26546.8	11877	11064.7	11018.3	10743.2	14250	6887.13	5575.56	2295.42	2712.31	4016.87	2285.85	3377.2	1418.22	7053.24	7811.47	5256.39	9281.08	2073.44	6295.12	2770	4642.45	3570.8	4265.46	9672	4296.88	5289.52	2480.57	17366.5	16628.9	17745.2	11790.8	19614.2	16629.1	2920.18	14435.2	777.576	11135	18598	797.34	9148.61	8077.78
M275T73			275.052	72.85			2601.81	2908.23	2001.24	1501.14	2088.2	2220.12	548.047	12924.4	9943.96	12453.5	9561.38	9554.29	10887.5	1660.4	14438.7	16889.4	11894.7	16387.9	9831.21	13888.4	2999.65	3705.41	1784.81	1286.36	1627.64	4610.48	2602.94	1466.25	20614.8	23080.1	21376.6	27529.4	28361.1	24192.4	3552.39	10935.4	10687.5	9692.1	7915.53	10442.1	9934.53	1220.81
M325T363			325.152	362.644			9056.37	9872.78	9687.73	8687.16	9059.34	9272.67	491.816	1478.14	27606.2	52612.2	22717.4	25056.7	25894.1	18191.5	1370.22	31462.5	23110.5	6483.67	11497.7	14784.9	12320	4811.19	4254.12	6898.63	12643	3084.79	6338.35	3785.66	14459.4	14710.3	11363.6	11611.8	12394.1	12907.8	1579.9	6407.34	5187.12	4630.18	5098.35	5035.47	5271.69	669.747
M255T421			255.233	420.748			76275.7	64432	69197.4	66090.5	84349.9	72069.1	8228.45	64951.9	32707.3	59493.1	54270.8	50899.8	52464.6	12261.7	87033.1	84142.5	60633.4	80294.8	35316.2	69484	21711.1	77585.8	28721.2	41463.9	31367.7	48267.3	45481.2	19587.6	46586.5	53733.6	74287	54214.5	47324.8	55229.3	11221	79858.7	15342.1	93198.8	21877.3	17028.5	45461.1	37861.1
M362T441			362.335	440.997			2077.83	4522.91	3547.74	31808.7	58691.3	20129.7	24838.5	4678.54	1624.71	1348.19	1652.1	3397.34	2540.18	1445.24	778.483	3881.19	820.31	1078.77	1000.43	1511.84	1330.31	1354.94	1336.67	1784.45	1922.22	1287.13	1537.08	293.825	2737.31	4977.15	20325	3185.54	1499.6	6544.92	7803.63	2307.82	4587.72	2327.13	6442.63	5965.59	4326.18	1956.1
M541T380			541.457	380.429			3872.44	6799.2	3826.85	5358.75	4281.79	4827.8	1263.04	2283.35	4352.61	2034.03	2798.5	3234.89	2940.68	915.756	1744.47	1340.2	3400.23	1692.63	9082.77	3452.06	3247.27	29833.1	47216	31202.8	68319.7	91030.7	53520.5	26100.5	63496	33862.9	58104.1	75498.3	68230.9	59838.4	15864.9	19530.3	10624.7	11314	5912.9	8860.37	11248.4	5078.23
M565T435			565.364	435.368			32150.5	28255.6	16376.5	16579.5	7634.31	20199.3	9916.29	12020.5	7690.14	5361.05	14013.5	12501.2	10317.3	3633.13	15556.3	10615.2	16751	18922.8	21232.7	16615.6	3993.32	63561.2	73637	43090.8	33710	105953	63990.3	28318.6	77554.4	92064.8	70274.3	132289	67775	87991.5	26506.6	55123.7	3920.51	64146	1466.84	1319.92	25195.4	31617.1
M606T519			605.525	519.097			26972.8	52406.9	16167	12805.7	16913.5	25053.2	16179.7	17858.2	29894.1	20074.6	27529.7	10063	21083.9	7938.07	21960.5	30739.5	48580.4	13979.4	29089.6	28869.9	12860	38976	29399.8	40886.1	109948	34509.4	50743.9	33391.4	60638	48265.7	43762.8	58467.7	118933	66013.4	30398.9	8985.8	4768.98	6993.37	2348.23	3237.52	5266.78	2724.7
M271T130			271.106	130.319			3428.18	1913.3	2499.02	558.119	2659.77	2211.68	1070.81	1821.91	2823.77	2431.5	3450.64	2202.33	2546.03	622.705	3922.25	3852.3	4127.43	3895.49	2360.73	3631.64	718.296	3301.2	656.985	3294.28	5262.9	4428.01	3388.68	1737.21	26438.1	46778.1	24406.6	42917	19806.3	32069.2	11987.8	11925.7	11671.2	9633.92	8671.57	7073.1	9795.11	2046.77
M402T425			402.3	424.897			18584.8	7825.18	8952.96	5293.14	17085.5	11548.3	5913.93	2531.28	784.679	2684.37	1012.93	1339.11	1670.47	879.741	15518.1	16535.7	10173	19266.2	1595.77	12617.8	6989.73	21741.6	3826.74	6295.21	2173.52	8085.93	8424.59	7781.5	8189.69	16586.4	24953.3	6843.55	6804.28	12675.4	7978.79	20310	1159.62	32592.2	2846.17	1993.58	11780.3	14091.6
M412T441			412.212	440.699			587.174	718.508	908.159	958.599	843.692	803.227	150.536	1075.87	728.838	683.791	91089.8	829.293	18881.5	40365.9	727.814	576.162	611.427	889.032	411.613	643.21	177.995	554.257	488.088	770.279	321.796	395.087	505.901	172.283	424.694	438.006	484.47	408.057	541.302	459.306	53.9322	412.533	506.597	467.25	386.344	313.963	417.337	74.378
M354T419			354.27	419.04			6034.76	14245.7	15788.9	11318.8	7953.65	11068.4	4107.33	15641.6	24084	12346.6	20740.8	16215.3	17805.6	4611.02	24295.5	21130.8	34117.8	21332.4	30839.9	26343.3	5855.25	40587.2	33733.1	45016.8	20004.6	15978.3	31064	12672.7	48471.9	45892.3	51437.9	25896.2	15360.2	37411.7	15889.2	74423.1	113835	95386.7	17696.1	119304	84128.9	41091.2
M161T58			161.071	57.5365			8663.89	3060.08	2796.3	3276.54	6981.86	4955.73	2689.42	7504.88	4665.86	14987.7	10141.3	10787.7	9617.49	3855.67	20898.2	12282.2	25403.2	17480.8	13121.6	17837.2	5473.5	7288.79	6138.2	6928.86	10621.9	10295.7	8254.67	2057.87	36219.3	40492.2	36472.4	36968.8	17099.3	33450.4	9302.22	21312.8	24970.9	19256.3	23195.6	19196.4	21586.4	2512.99
M296T322			296.295	321.662			4852.58	15671.2	14343	47727.7	15358.5	19590.6	16353.2	5667.02	2722.74	2455.8	2760	6597.39	4040.59	1941.05	5231.8	3685.19	5700.31	16894.8	2971.08	6896.64	5698.47	3863.12	2073.84	3219.23	8208.39	18187.7	7110.46	6613.74	12592.3	17009	40689.4	10142.2	6960.24	17478.6	13484.2	6873.42	17727.5	16234.3	5034.61	1858.84	9545.73	7040.2
M311T516			311.258	516.044			38775.2	48152.4	35814.2	33671.7	28862.9	37055.3	7179.98	35364.1	54683.9	23649.8	44788.1	39475.2	39592.2	11476.1	39865.1	27731.5	45154.4	25659.5	38658.5	35413.8	8357.42	52062.3	73212.7	59494	78051.7	63564.7	65277.1	10454.3	63531.1	58776.1	63694.5	66452.4	83720.4	67234.9	9620.14	28570	18377.3	26260.6	9460.75	13454.7	19224.7	8157.6
M164T47			164.093	47.387			67801.1	36313.5	33366.9	31319.2	30123.5	39784.8	15836.4	31957.2	25568.4	14773.9	11316.1	24981.5	21719.4	8466.68	27565.3	16397.7	13737.1	27894.1	9798.93	19078.6	8239.66	20687.1	19954.9	23319.9	30236.1	25905.8	24020.8	4192.85	22705.7	16380.3	24645.6	20495.1	14149.3	19675.2	4357.55	7817.95	10684.9	7700.92	9012.41	8002.74	8643.78	1253.39
M245T306			245.079	306.243			33647.1	28561.2	33415.6	29352	38264.9	32648.2	3895.56	40250.2	25860.8	33546.3	28609.8	40547.6	33763	6655.12	37224.6	26256.5	33572.6	38812	30119.3	33197	5136.46	44453.5	146635	36454.6	40969.7	39144.9	61531.5	47662.9	81804	38849.8	30637.1	43398.4	189719	76881.7	66073	67968.6	123556	589772	148450	50330	196015	223706

## Sheet: Matrix model #1
Feature	Annotationa	Observed ion(s)	Mz med (Da)	RT med (s)	PLS-DA (Comp. 1)		Biofilm control							Biofilm Cu-1000							Biofilm Cu-1400							Planktonic control							Planktonic Cu-1000							Planktonic Cu-1400
					VIP number	VIP Score	Biofilm control - Replicate 1	Biofilm control - Replicate 2	Biofilm control - Replicate 3	Biofilm control - Replicate 4	Biofilm control - Replicate 5	Mean	SD	Biofilm Cu-1000 - Replicate 1	Biofilm Cu-1000 - Replicate 2	Biofilm Cu-1000 - Replicate 3	Biofilm Cu-1000 - Replicate 4	Biofilm Cu-1000 - Replicate 5	Mean	SD	Biofilm Cu-1400 - Replicate 1	Biofilm Cu-1400 - Replicate 2	Biofilm Cu-1400 - Replicate 3	Biofilm Cu-1400 - Replicate 4	Biofilm Cu-1400 - Replicate 5	Mean	SD	Planktonic control - Replicate 1	Planktonic control - Replicate 2	Planktonic control - Replicate 3	Planktonic control - Replicate 4	Planktonic control - Replicate 5	Mean	SD	Planktonic Cu-1000 - Replicate 1	Planktonic Cu-1000 - Replicate 2	Planktonic Cu-1000 - Replicate 3	Planktonic Cu-1000 - Replicate 4	Planktonic Cu-1000 - Replicate 5	Mean	SD	Planktonic Cu-1400 - Replicate 1	Planktonic Cu-1400 - Replicate 2	Planktonic Cu-1400 - Replicate 3	Planktonic Cu-1400 - Replicate 4	Planktonic Cu-1400 - Replicate 5	Mean	SD
M375T202			375.145	202.493	1	4.04	273174	46256.1	29550.8	29115.8	62574.5	88134.2	104357	206108	111318	350286	77886.2	137276	176575	107924	908501	1.62124e+06	636806	1.35159e+06	247990	953226	548731	34047.5	15999.5	17809.2	350154	556002	194802	246849	839956	606415	732886	678003	179015	607255	254130	68048.7	74980.3	45899.4	94784.2	59131.2	68568.7	18245.5
M287T204_1			287.101	203.512	2	3.68	740450	103866	211838	184189	261455	300360	252554	195069	130902	335962	118465	142006	184481	89570.5	530121	1.06636e+06	440302	878809	353452	653808	304926	476388	286154	338602	1.41182e+06	799613	662516	464077	262759	250658	230875	163326	94272.2	200378	70676.9	49575.7	96490.8	65553.5	121550	87476.4	84129.3	27853.8
M391T103			391.14	103.114	3	3.6	291055	73382.9	80554.7	67616.2	118245	126171	94267.6	613042	689560	924947	384946	722922	667083	195345	1.158e+06	1.06006e+06	1.00774e+06	888088	356064	893991	316077	40431.8	26949.6	27048.3	214018	545591	170808	223992	1.23605e+06	945925	1.09153e+06	1.40439e+06	435131	1.02261e+06	369824	60864.8	69237	41305.8	68352.7	49301.8	57812.4	12204.8
M229T74_1			229.059	73.988	4	3.44	313062	131588	100741	85502.5	137544	153688	91654	600066	554161	747068	571353	635907	621711	76621.1	965588	711087	797860	951286	534251	792014	179249	85992.7	39214.2	57036.2	163162	344836	138048	124933	1.5466e+06	1.52007e+06	1.66227e+06	1.87275e+06	928253	1.50599e+06	351626	618500	680881	539959	596760	490898	585399	73035.4
M285T123_2			285.085	122.636	5	3.11	232699	109084	185797	73168.6	139479	148045	62827.9	562481	588206	415918	422096	805144	558769	158640	302345	509490	309422	174628	139109	286999	145550	136067	68613.3	105815	136869	133624	116198	29571.3	172258	194597	144908	141497	70001	144652	47009.1	26764.3	18229.5	17179.1	29817.9	31478.8	24693.9	6611.35
M147T65			147.055	65.3955	6	2.88	60963.2	297130	26378.7	29827.9	34933.6	89846.6	116669	61612.8	46211.8	105963	62409.3	74761.5	70191.6	22414.6	142587	205909	312007	170869	305530	227380	77642.5	113044	59389.8	81561.1	141795	124340	104026	33232.2	720318	608583	729309	1.05089e+06	482272	718274	211240	200494	179662	161010	162683	157054	172180	18037.4
M290T280_2			290.093	280.214	7	2.88	889523	76291.5	384618	366717	347737	412977	294811	9388.78	9226.92	254697	100068	6292.1	75934.6	107549	94999.4	101870	54451.4	25225.5	8285.23	56966.4	41371.9	145031	225355	238809	586723	449217	329027	182753	2543.05	23336	3675.33	7028.7	35599.6	14436.5	14484.6	1682.18	1853.58	1280.91	1853.98	1243.03	1582.74	301.377
M347T360			347.219	360.486	8	2.79	168763	34761.8	216330	177622	202464	159988	72540	68089.2	65001.6	121257	67828.5	49071.8	74249.5	27424	91904	70403.8	53573.7	111980	29191.6	71410.7	32278.1	25187.8	40909.6	38370.9	32199.7	144972	56328	49924.4	449550	423874	236193	503138	407873	404125	100589	228094	122069	169461	92922.3	88226.8	140154	58836
M120T297			120.045	297.339	9	2.7	43312	41408	27288.8	26106	39534.6	35529.9	8183.46	60840.7	53268	102510	68009.2	92653.8	75456.3	21148.5	77277.3	135736	78129.3	154333	44209.1	97936.9	45593.7	32820.8	51754.6	28513	72166	152855	67621.9	50689.5	839359	786168	732744	1.06588e+06	505433	785917	201701	265403	135046	147011	150680	157466	171121	53329.7
M355T342			355.369	341.902	10	2.65	28331.4	167094	66104.9	1.01465e+06	2.10213e+06	675661	894281	141297	40333.9	70596.4	37194.9	57900.1	69464.6	42381.9	120638	129316	163449	319118	35764.3	153657	103748	154153	73037.7	113522	293122	230036	172774	88836.1	153313	323337	912015	376604	124007	377855	317474	170322	214583	342791	106296	59751.6	178749	109173
M385T345_2			385.379	345.145	11	2.63	207126	618381	451959	2.73458e+06	221958	846802	1.06904e+06	263540	66852.7	63635.1	92550.4	181812	133678	86954.2	217523	100385	208948	548523	163474	247771	174430	28246	15609.6	26499.4	700833	591174	272472	343217	138849	127255	613369	142289	57840.2	215920	224821	158495	229824	287127	116021	48551.4	168004	93639.6
M413T106			413.122	105.61	12	2.6	54034.9	18742.3	14988.4	17345.3	27666.2	26555.4	16093.7	219643	140831	205354	87849.5	161934	163122	52778.7	267961	262639	170130	199450	70995.4	194235	80484.3	5848.03	4973.21	5272.46	31024.9	69176.3	23259	27972	157802	113168	135006	173402	54013.3	126678	46593.6	8043.04	11890.4	6817.13	9510.44	7267.49	8705.71	2053.31
M688T491	PE (C16:1, C16:1)	[M+H]+	688.491	490.647	13	2.58	109284	54348.8	68031.6	50825.3	21841.8	60866.4	31866.3	141570	244651	134820	153157	110129	156865	51537	159912	92053.7	281425	277860	580792	278409	187226	610499	756.916	1.04605e+06	184583	217375	411854	418373	1.17193e+06	1.38685e+06	1.28155e+06	217311	437984	899125	532932	2.98751e+06	3.68569e+06	3.14559e+06	3.75874e+06	2.58396e+06	3.2323e+06	492567
M287T155			287.101	154.631	14	2.54	74044.8	13774.2	29010.5	24584.6	32199.9	34722.8	23058.8	27461.4	17255	42552.7	14017.4	15857	23428.7	11895.5	69472.5	223968	46324	117098	38679.2	99108.3	76206.3	65442	81972.3	53558.2	214913	149269	113031	67932.8	41928.1	40404.9	28486.1	23664.5	18534	30603.5	10278.9	10226	11704.3	9350.59	16139.9	14135.7	12311.3	2804.88
M347T114			347.107	114.164	15	2.53	18275.8	31983.9	23209.9	30095	28824	26477.7	5631.57	77823.9	78755.7	84891.3	82142.3	104968	85716.2	11122.3	30514.7	20641.6	59779.7	15682.4	33440.7	32011.8	17111.9	29336.7	25613.9	27567.6	21716.3	39881.9	28823.3	6799.66	33989.9	33488.9	35081.2	36364.5	28161.3	33417.2	3138.98	28965.5	29373.4	26844.7	31048.4	29913.7	29229.2	1545.5
M223T62			223.07	61.643	16	2.49	4307.79	6551.64	5252.94	7518.12	6174.5	5961	1230.19	73797.3	53177.3	88692.7	54486.8	59831.1	65997	15089.6	142280	125903	108392	177143	73510.1	125445	38549.7	1621.13	2897.26	2217.54	6356.29	3541.69	3326.78	1840.4	29686.9	26557.2	29278.5	15035.5	12869.3	22685.5	8098.73	7542.25	10974.3	6114.25	14646	10591.7	9973.71	3317.43
M531T508			531.408	507.516	17	2.48	8172.73	11568	18644	36064.8	12796.7	17449.2	11070.9	27304.1	19984.6	7061.73	19429.5	19137.2	18583.4	7276.44	2821.56	10307.7	13406.7	46938.7	4934.74	15681.9	17971.8	964878	678258	1.01352e+06	9142.83	20198.3	537199	493918	4595.72	10009.1	36007.3	6081.49	99791.7	31297.1	40359.8	5716.29	7104.21	8933.95	2355.52	3138.23	5449.64	2732.46
M703T505	PE (C17:1, C16:0)	[M+H]+	702.507	505.135	18	2.41	5252.13	5778.79	4958.46	5288.34	2486.73	4752.89	1300.59	15659.2	30405.5	13763.4	17347	17778.5	18990.7	6574.42	15994.3	9849.48	23483.3	9639	78364.7	27466.2	29009.8	15618.2	32340.7	22038.3	5010.02	12616.3	17524.7	10298.4	265.382	51897.8	42780.5	5604.96	11321.1	22373.9	23346.5	462868	800033	470072	753461	1.15492e+06	728270	285007
M327T318			327.337	317.938	19	2.41	21742.8	117450	61368.8	463723	602279	253313	262191	55973.5	27668.3	50963.5	32168.2	65655.6	46485.8	16098.4	82916	54937.7	103133	256906	18279.4	103234	91621	130238	38162	96428.9	106758	227034	119724	68900.6	201098	461265	936019	243678	99224.7	388257	333483	154230	376218	365686	83337.2	44452.7	204785	156756
M147T74			147.055	74.3615	20	2.39	35246.1	30192.6	14995.2	12240.3	16347.7	21804.4	10230.5	98380.5	63988.9	93854.2	69273.2	77690.5	80637.5	15037.5	136135	114915	105766	127847	77680.7	112469	22681	20512.3	19040	17221.5	28625.2	48298.4	26739.5	12816	262499	237336	286438	325994	199519	262357	47969.6	77866.8	73920	67969.6	74815.6	68506.4	72615.7	4259.91
M233T133			233.093	132.963	21	2.38	156489	18008.7	35928.1	34260.6	44189	57775.1	55992.5	46339.3	26910	43135.8	30124.3	21276.5	33557.2	10746.1	110049	246173	84758.7	111189	60581.8	122550	72173.8	22851.1	35138.9	27064.8	79568.2	90726.2	51069.9	31666.7	69095.3	66811.9	65110.7	66728.8	31428.6	59835	15942.9	21274.1	20607.4	22591	23961.2	21756.3	22038	1295.56
M233T51_2			233.129	50.915	22	2.36	48926.9	3220.01	32979.7	26121.4	13973.9	25044.4	17559.6	5617.86	1644.94	5491.46	3790.1	2688.07	3846.49	1734.62	13543.3	20426.3	5565.59	27830.6	645.273	13602.2	10971.4	221899	164624	234145	144725	196197	192318	37655.1	27302.9	19426.4	25566.6	21529.5	4535.57	19672.2	9022.19	6634.4	7650.48	5358.53	7682.91	5677.71	6600.81	1080.42
M284T452			284.295	451.966	23	2.24	202295	288106	222559	194573	18450.8	185197	100213	182991	220997	3485.25	115738	333678	171378	122701	177283	3649.62	7944.15	84872.4	4874.07	55724.6	76168.5	22022.2	13090.8	21230	16498.1	3777.55	15323.7	7406.65	3966.75	3518.84	7231.35	3857.4	15472.2	6809.32	5070.64	3109.82	827.535	1869.93	1416.72	681.429	1581.09	977.841
M351T411_2			351.33	410.545	24	2.22	91851.1	28821.8	70309.6	239.812	32058	44656.1	36289.5	50128.4	1201.27	140422	99971.2	279615	114268	106214	1006.28	1613.69	1174.88	1578.41	884.207	1251.5	331.27	1386.38	3197.78	3486.53	799462	2625.14	162032	356336	687.74	772288	1098.59	1564.41	1799.49	155488	344802	4033.66	5993.37	5539.03	4651.79	6850.79	5413.73	1107.02
M132T42			132.077	42.3645	25	2.22	91070.2	192921	304326	289266	321556	239828	96970.2	106992	108060	172008	145191	141629	134776	27510.4	129666	207221	233580	283624	475373	265893	129654	643857	578470	438749	382.263	835133	499318	313263	823005	911413	996419	842697	917546	898216	68794.3	1.45477e+06	1.03645e+06	1.29722e+06	1.24294e+06	1.35065e+06	1.27641e+06	155288
M369T344			369.384	344.204	26	2.21	10802.2	171454	23917.8	192657	777298	235226	314141	28066	9225.5	15840.1	12692.6	16924.5	16549.7	7102.63	23389.2	28285.7	51176.2	51433.2	18352	34527.3	15713.4	78082	34120.6	65898.1	67909.7	43219.2	57845.9	18387.8	22026.5	77321	109863	52502.4	71016.2	66545.8	32371.5	24213.9	30636.4	62582	17359.8	14592.1	29876.8	19316.9
M598T409_1	OL (C14:0, C16:0)	[M+H]+	597.52	408.641	27	2.17	701820	779516	444232	719424	614630	651924	130243	303613	677940	98224.3	583940	513527	435449	233479	284731	180859	820108	266177	1.05063e+06	520501	389367	2.88236e+06	3.61558e+06	2.58922e+06	4.34134e+06	4.53879e+06	3.59346e+06	861340	4.0701e+06	2.95318e+06	3.5561e+06	4.19298e+06	4.00972e+06	3.75642e+06	509527	1.77769e+06	1.53423e+06	1.64329e+06	1.32767e+06	1.73789e+06	1.60415e+06	180877
M537T409_1			537.333	409.178	28		28744.9	19046.2	17050.5	16275.6	7446.19	17712.7	7605.79	11224	10859.4	7006.12	14135.7	10296.5	10704.3	2545.15	7885.39	5227.65	16951	12606.9	32548.6	15043.9	10765.6	132559	151342	104415	35603.8	63600.3	97504.2	47844.2	87101.9	8831.68	85849.1	86312.2	44294.5	62477.9	35104.1	83749.3	12001.2	59605.9	9047.12	9432.71	34767.2	34777.3
M678T434_1	OL (C18:1, C18:1)	[M+H]+	677.582	434.179	28	2.17	1.87505e+07	1.03942e+07	1.16734e+07	1.17678e+07	8.70988e+06	1.22591e+07	3.83396e+06	9.39994e+06	1.60195e+07	2.55019e+06	1.48292e+07	1.15304e+07	1.08658e+07	5.33874e+06	1.19175e+07	9.43368e+06	1.90616e+07	1.51811e+07	1.94867e+07	1.50161e+07	4.3916e+06	1.62574e+07	2.15459e+07	1.68014e+07	2.09449e+07	2.34074e+07	1.97914e+07	3.11904e+06	2.01286e+07	1.65274e+07	1.31235e+07	2.54713e+07	2.15202e+07	1.93542e+07	4.73081e+06	1.04041e+07	4.13669e+06	7.19516e+06	6.8635e+06	3.37721e+06	6.39533e+06	2.79015e+06
M664T424			663.566	424.209	29	2.16	307755	352290	250792	397565	190772	299835	81647.7	568974	1.42233e+06	259151	888343	999500	827660	440729	513689	313725	1.26984e+06	428335	1.28606e+06	762331	476048	469614	568327	503882	1.005e+06	899899	689343	245607	870442	737014	933738	738327	695974	795099	101636	1.95674e+06	2.02176e+06	1.67185e+06	1.57654e+06	1.37358e+06	1.72009e+06	269265
M622T404_1	OL (C16:1, C16:1)	[M+H]+	621.52	404.318	30	2.12	652242	553255	408520	585273	433057	526469	103238	235004	556957	264600	440437	304487	360297	135156	249733	191726	668954	294116	1.26339e+06	533584	448812	2.41325e+06	3.11114e+06	1.92598e+06	5.44104e+06	4.85839e+06	3.54996e+06	1.5338e+06	3.75607e+06	2.75567e+06	3.56572e+06	4.29473e+06	3.95118e+06	3.66467e+06	575216	1.07259e+06	2.04326e+06	895907	878899	1.05984e+06	1.1901e+06	485296
M287T113			287.101	113.178	31	2.11	54102.3	7591.85	21647.2	19434.2	15085.4	23572.2	17890.7	21140.6	10655	22394	8194.77	8738.14	14224.5	6960.11	34279.4	231529	26603.8	58337	19480.2	74045.8	89242.8	61009.8	38736	39124.4	164811	98306.3	80397.4	53059.7	30122.8	27629.3	27265.1	21112.6	13803.9	23986.8	6588.2	7109.09	11577.7	7473.63	12103.7	8464.74	9345.77	2338.35
M679T458			678.586	458.472	32	2.1	1.40703e+06	992112	851062	1.00322e+06	935951	1.03788e+06	214974	1.04313e+06	1.65401e+06	393887	620655	1.00842e+06	944021	480955	1.54293e+06	809786	1.70529e+06	1.79506e+06	1.47703e+06	1.46602e+06	388006	4.67696e+06	5.84998e+06	5.54006e+06	5.40603e+06	3.93871e+06	5.08235e+06	770677	7.67327e+06	8.25815e+06	6.41888e+06	6.12014e+06	6.13698e+06	6.92149e+06	982609	1.13023e+07	7.31447e+06	4.7988e+06	1.48475e+06	5.1151e+06	6.00308e+06	3.62131e+06
M664T440	OL (C18:1, C17:1)	[M+H]+	663.567	439.922	33	2.1	73072.4	85870.6	21486.1	81661.1	87855.1	69989	27702.4	196324	217715	50090.2	178645	266239	181803	80604.3	178307	137947	68048.4	107824	86270.2	115679	43627.4	67897.4	67268	77734.6	87914.9	55007	71164.4	12355.8	151427	154589	223505	139672	90836.7	152006	47468	260777	1.05678e+06	571432	388099	1.18301e+06	692020	408351
M231T200			231.077	199.986	34	2.09	2280.23	1923.31	1724.65	1758.5	4045.15	2346.37	974.851	19079	18734.4	25369.9	15056.7	42412.3	24130.4	10871.2	21290.7	22829.3	26539.3	41793.2	12710.4	25032.6	10652.3	2568.8	2284.17	2618.78	4114.25	3347.17	2986.63	742.441	166823	150916	160396	217728	95417.8	158256	43638.8	38804.6	35354.4	31059.1	33111.7	30412.5	33748.5	3424.54
M413T301_1	LOL (C18:1)	[M+H]+	413.337	300.854	35	2.08	454010	481112	731471	772071	651542	618041	144369	482706	515074	628708	539226	523818	537906	54803.1	603071	401505	597619	539173	866071	601488	168744	3.35574e+06	2.44004e+06	2.61825e+06	4.03287e+06	2.3938e+06	2.96814e+06	709762	2.61432e+06	3.42971e+06	2.86692e+06	3.33281e+06	1.74134e+06	2.79702e+06	678247	852222	597693	398169	1.05601e+06	604630	701746	255229
M171T181			171.15	181.448	36	2.06	2059.21	2311.74	1665.11	3138.67	2543.37	2343.62	550.972	1761.22	1463.83	1832.36	1044.93	2795.31	1779.53	646.964	35992	33769.1	20374.3	28196.5	23551.4	28376.7	6603.5	3807.28	2875.72	3923.37	4295.84	2541.88	3488.82	743.997	4608.37	3964.17	8038.75	4837.93	3617.69	5013.38	1760.43	2818.27	2984.13	2068.3	3054.36	2847.11	2754.43	395.652
M325T412	OL (C16:0, C16:0)	[M+H]+	325.274	412.301	37	2.05	4838.72	8020.36	8807.02	5859.28	59471.2	17399.3	23573.1	7290.35	15921.4	8002.4	9451.27	15855.3	11304.1	4256.67	27944.2	22039.3	12527.2	10077	13137.1	17145	7548.51	8812.56	4891.87	7514.36	3621.58	7263.83	6420.84	2109.52	11150.4	7832.2	12304.7	4711.67	6642.71	8528.35	3152.13	103559	758696	201686	353165	566629	396747	267290
M311T400_1			311.258	399.826	38	2.05	124673	148652	127398	165208	84780.5	130142	30279.2	117750	328540	152055	162529	246546	201484	85360.8	143624	140665	342339	292604	442541	272355	130561	1.1603e+06	1.08965e+06	1.01625e+06	1.57103e+06	1.17935e+06	1.20332e+06	215379	2.15357e+06	1.42235e+06	2.03944e+06	2.16159e+06	1.4935e+06	1.85409e+06	365728	3.6492e+06	713277	3.41977e+06	225063	282615	1.65798e+06	1.72527e+06
M123T46			123.055	45.958	39	2.04	31589.5	12562.7	12495.6	13053.7	18012.5	17542.8	8184.71	42126.1	21663.3	16198.9	28305.9	23448.2	26348.5	9825.24	22065.2	14524.8	15330.9	20318.4	29073.8	20262.6	5876.5	408209	179148	369981	33487.6	78965.3	213958	168879	29666.8	33728	34924.6	32434.8	29136.7	31978.2	2518.34	66079.1	83853.8	73982.8	82988.8	78175.5	77016	7290.25
M596T400	OL (C14:0, C16:1)	[M+H]+	595.504	399.599	40	2.04	271219	313074	229405	304263	290984	281789	33257.3	198177	293049	184966	253114	2473.88	186356	111573	134665	140908	325284	126547	844217	314324	307619	1.08294e+06	1.4299e+06	965994	3.09909e+06	3.52969e+06	2.02152e+06	1.20217e+06	2.05931e+06	1.16263e+06	1.50151e+06	2.81269e+06	2.23673e+06	1.95457e+06	644083	519022	979725	413647	472319	992889	675520	286192
M132T62			132.044	62.074	41	2.04	346396	11550.1	71340.8	74542.3	41724	109111	135078	37013.5	17516.3	19743.7	12111	34644.8	24205.9	10999.5	59823.5	37960.2	16080	66080	5481.15	37085	26450.6	317879	157162	261639	149516	238063	224852	71483.1	59242.4	37140.4	65358.2	76128.5	6414.68	48856.8	27670	15636.2	31788.9	17429.2	16547	13704.8	19021.2	7269.68
M678T458			677.582	457.991	42	2.04	3.83708e+06	2.50369e+06	2.12409e+06	2.78808e+06	2.1298e+06	2.67655e+06	705920	2.56904e+06	4.27977e+06	849478	2.65619e+06	2.52819e+06	2.57654e+06	1.21372e+06	4.03898e+06	1.9875e+06	4.20207e+06	4.55716e+06	4.05851e+06	3.76884e+06	1.01725e+06	1.01007e+07	1.38301e+07	1.17558e+07	1.18225e+07	8.55237e+06	1.12123e+07	1.98945e+06	1.71728e+07	1.78649e+07	1.41527e+07	1.31012e+07	1.29474e+07	1.50478e+07	2.31592e+06	2.53103e+07	1.70869e+07	1.21766e+07	4.12122e+06	1.25166e+07	1.42423e+07	7.75038e+06
M393T432			393.261	431.519	43	2.01	182573	109270	101889	79111	123803	119329	38867.1	76126.6	15761.5	100616	59338.5	23864.5	55141.5	35549.2	258298	149422	85770.3	292956	26411.5	162572	112666	201163	31013.7	50201.4	11614.8	259069	110612	111831	27904.7	41743.1	114269	214174	295563	138731	114647	398616	80947.7	510948	49186.6	11783	210296	228008
M379T427			379.282	427.411	44	2.01	39908.8	55976.7	50693.3	41940.4	24389.6	42581.8	12080.3	84275.6	147125	96696.5	95080.5	83269	101289	26338.2	138580	99313.8	196621	208850	268851	182443	65572.8	91297.2	61237.8	79409.5	17818.8	27694.7	55491.6	31933.6	156069	168224	250799	94263.9	51302.1	144132	76165.8	499007	112447	123308	104184	102819	188353	173853
M676T498	PE (C16:1, C15:0)	[M+H]+	676.491	498.119	45	2.01	5953.72	2780.92	2286.83	2888.65	1405.03	3063.03	1718.83	4669.06	5607.23	6858.62	4968.65	5310.34	5482.78	846.261	8596.45	3753.71	6533.16	9120.85	35038.2	12608.5	12714.8	14311.9	18318.4	13613.3	3595.22	7103.74	11388.5	5929.05	12308.1	24775.4	17853.5	3597.4	4769.23	12660.7	8920.13	218112	350968	209513	332498	427790	307776	92972.1
M638T421			637.551	421.222	46	1.99	333492	512458	350870	538475	243542	395767	125548	613361	1.59819e+06	252202	1.13833e+06	1.21373e+06	963164	530226	638853	287449	1.46187e+06	404380	1.49592e+06	857694	581146	597992	803190	679665	1.08469e+06	1.23895e+06	880898	272168	932502	751078	1.03147e+06	904523	968654	917646	104518	2.08531e+06	1.31377e+06	1.84512e+06	1.89249e+06	1.58419e+06	1.74417e+06	299752
M665T438			664.57	438.428	47	1.98	35098.8	44350.2	35569.7	42618.9	46712.5	40870	5260.83	94219.9	113101	76898.6	97143.2	132369	102746	20957.9	88546.3	70163.7	117528	73114.7	40025.3	77875.7	28288.6	34484.8	31322.1	33560.2	40208.2	82987	44512.5	21756.1	74941.8	69768.8	113043	22725.9	41589.7	64413.9	34507.9	357262	591780	341023	243948	663716	439546	179000
M321T272			321.087	272.423	48	1.97	17166.6	36907.9	52586.8	59542.2	34260.4	40092.8	16614.4	28019.4	30454.6	37421.9	37833.7	43289.6	35403.8	6147.9	17929.8	14457.9	21510.2	21203.9	13083.1	17637	3829.32	1780.35	1256.42	1510.73	9945.51	5362.81	3971.16	3736.73	59281.4	85241.8	53932	69108.4	39428.8	61398.5	17108.8	28094.4	23979.2	27550.3	28378.4	24974.9	26595.5	1987.99
M301T219			301.116	219.069	49	1.96	33287.7	5981.94	11918.1	9652.5	13963.7	14960.8	10664.5	11604	7650.26	20191.2	6730.31	11400.1	11515.2	5318.05	35330.7	92788.8	25689.9	68280.9	16422	47702.5	31907.4	166019	77750	73828.6	409849	188949	183279	136729	101997	102932	88642.1	107698	40314.9	88317	27752	24819.2	24118.7	21355.5	25379.2	25529.5	24240.4	1705.22
M237T244			237.103	243.597	50	1.95	1739.01	1723.7	1599.06	1910.77	2841.23	1962.75	503.465	1377.25	936.852	4141.16	2643.17	1616.47	2142.98	1280.74	11888.5	12889.3	29415.6	19077	26354.5	19925	7845.62	3237.89	2985.16	4558.57	6221.55	5090.76	4418.78	1338.92	128409	176154	114660	158862	114604	138538	27720.3	70731.8	56185.3	52731	62128	51106.9	58576.6	8000.71
M341T378			341.267	378.243	51	1.94	10501.8	18784.2	11885.6	12713.1	15439.8	13864.9	3287.66	12312.2	12871.8	11858.7	12232.3	24963.6	14847.7	5666.56	33975.5	32328.5	32779.6	36605.2	26492.2	32436.2	3715.17	13642.3	25319.7	16948.4	11672.8	173292	48175	70136.6	19665.8	18388.1	23122.4	19957.6	44565.8	25139.9	10998.3	123203	1.00186e+06	151539	146206	1.21461e+06	527484	535567
M385T220			385.177	220.211	52	1.93	37205.2	85461.3	89464.2	86557.9	88236.3	77385	22513.6	21387.1	22241.3	23997.3	21689.5	22903.8	22443.8	1043.02	16388	13612.6	21140	13148.1	13180.3	15493.8	3430.46	58464.9	46401.4	50167.4	43709.4	128862	65520.9	35843	142822	95762	139245	100065	109171	117413	22135.4	49166.7	40089	41695.7	47492.7	47414.1	45171.7	4009.09
M267T293			267.075	293.298	53	1.93	21324.8	11741.9	17050.8	13329.9	10523.2	14794.1	4400.07	65071.1	50630.5	91822.8	64058.9	59408.6	66198.4	15418.5	58724.5	96453.5	53033.9	73875.8	41962.6	64810	21102.2	6375.6	13139.2	7253.2	27886.6	26476.7	16226.3	10345.5	81388.7	86413.7	68881.3	94211.8	86296.1	83438.3	9343.39	17764.6	11941	12018.5	16997.6	14282.4	14600.8	2720.23
M626T424_1			625.551	423.842	54	1.92	3.13817e+06	3.99985e+06	2.80021e+06	3.66253e+06	1.95183e+06	3.11052e+06	796122	2.06498e+06	2.51378e+06	803837	2.87748e+06	2.98334e+06	2.24868e+06	884126	1.88503e+06	1.28785e+06	3.30114e+06	1.75075e+06	3.18296e+06	2.28155e+06	905332	7.36656e+06	9.19438e+06	7.81394e+06	7.93477e+06	7.87681e+06	8.03729e+06	684635	6.02383e+06	5.2687e+06	4.98048e+06	6.90415e+06	7.66775e+06	6.16898e+06	1.12148e+06	4.18596e+06	1.99235e+06	2.93061e+06	1.95798e+06	998855	2.41315e+06	1.20365e+06
M379T206			379.079	206.343	55	1.92	7562.38	6072.93	6685.67	8070.34	5674.21	6813.11	1000.41	46640.6	42348.1	34489.4	38554.4	48213.4	42049.2	5668.57	20812.5	18677.8	28249.4	11140	15938.4	18963.6	6326.26	7822.77	4488.66	5760.23	8627.43	7749.68	6889.75	1708.11	21140.6	21470.6	20820.8	25117.6	17796	21269.1	2604.36	11404.7	10374.9	9272.8	10390.5	10374.7	10363.5	754.123
M319T110_1			319.069	109.586	56	1.92	369619	1720.42	17532.3	17110.9	663.67	81329.3	161361	4471.35	3116.4	4123.17	2692.13	354.614	2951.53	1621.81	12012.4	6786.8	3404.08	11319.2	2384.19	7181.33	4412.96	202501	111457	193107	54082.3	206865	153602	67950.4	24998.1	8654.5	13555	18222.8	4744.59	14035	7956.45	3822.35	3852.81	3185.38	3279.57	679.454	2963.91	1312.87
M329T401_1	MAG (C16:1)	[M+H]+	329.269	400.812	57	1.91	297473	365353	317320	414495	153025	309533	98531.4	290890	765656	369624	406365	528565	472220	185083	368276	226645	755525	677575	995490	604702	308057	1.63878e+06	1.70787e+06	1.50262e+06	1.76865e+06	1.65106e+06	1.6538e+06	98998.1	2.41578e+06	1.93274e+06	2.26746e+06	2.34731e+06	2.03503e+06	2.19966e+06	207034	3.49914e+06	536204	3.2992e+06	134275	174943	1.52875e+06	1.71606e+06
M297T383			297.242	383.217	58	1.88	19583.9	30491	17035.9	18586.6	20032	21145.9	5349.14	16851.1	15656.7	16483.6	14727.6	22197.9	17183.4	2920.06	13821	16115.7	13121.5	15772.7	17659	15298	1829.43	73577.5	38317.1	68037.7	34326.5	41767.5	51205.3	18192.8	25978.5	21658	31778	28239.1	33682	28267.1	4758.32	71259.5	812548	78458.2	512260	811753	457256	369935
M324T363			324.149	362.542	59	1.87	46295.8	52623.7	43036.5	43922.4	49168.5	47009.4	3937.16	5443.23	3421.13	3653.76	2393.74	3036.21	3589.61	1140.7	3765.4	2671.24	4013.83	24378.3	2508.83	7467.53	9476.32	24588.2	19242.9	24077.5	68763.5	11666.6	29667.7	22462.5	74882.1	72957	66028.1	59234.9	73314.4	69283.3	6570	31186	27306.2	20718.9	26312.7	22825.3	25669.8	4065.78
M352T498			352.358	497.834	60	1.87	127639	29349	349728	496004	235277	247599	183242	245947	203597	24641.9	101442	312149	177555	114724	328163	106628	114264	2.04325e+06	11789.5	520820	858906	1517.98	1333.18	1109.44	1602.85	4203.06	1953.3	1271.85	1456.17	624.787	1395.27	1510.4	1859.88	1369.3	453.623	1087.05	1202.16	1664.71	264.066	613.294	966.256	542.157
M317T115			317.111	114.651	61	1.87	88822	37895.7	32090.4	32821.9	58946.5	50115.3	24235.7	132094	116967	147903	63950.5	134683	119120	32738.7	102243	125702	114536	83201.2	61330.1	97402.4	25596.5	73146.3	40177.6	59375.1	121874	70111.7	72936.9	30248.8	85192.7	88300.3	82562.9	89998.8	44210.2	78053	19133.5	15874.4	17783	13238.9	14983.8	12041.3	14784.3	2243.45
M662T485			662.475	485.178	62	1.87	23021.2	5931.28	9651.86	5601.76	3180.41	9477.3	7916.95	13449.9	12886.6	20337.3	14843.2	8742.18	14051.8	4184.68	19178	11626.8	19496.6	31127.8	78873	32060.4	27081.5	103719	168756	118028	11336.7	35897.2	87547.4	63759.7	102497	200746	161876	18537.7	57390.2	108209	74329.2	658720	943976	773350	125460	187493	537800	363258
M301T116_2			301.126	116.046	63	1.83	14727.4	465.037	17303.1	16553.8	17210.5	13252	7222.64	16405.6	14728.4	15781.2	16401.5	15294.7	15722.3	724.986	15823.2	910.855	16884.7	14839.9	14399	12571.5	6588.5	281815	178099	222833	272293	218474	234703	42546.7	159125	143597	167784	146641	145731	152575	10451	193080	195070	153078	227057	201987	194054	26613.8
M285T202			285.122	202.002	64	1.81	4358.79	873.248	2162.95	2922.41	6442.78	3352.04	2139.46	3528.46	2989.78	5284.31	3921.16	3378.55	3820.45	883.683	9393.39	8432.55	13826.8	11292.5	5961.86	9781.43	2966.8	5916.37	6376.77	4974.75	19469.7	15172.3	10382	6533.68	112693	179205	108191	177132	109539	137352	37303.1	71782	55834.9	52273.2	45651.1	38499.9	52808.2	12504
M628T444			627.558	444.1	65	1.81	109514	120907	56296.1	116514	124765	105599	28137.6	95727.7	63206.2	6966.14	39565.6	113965	63886.2	42876.7	34817.3	65917.5	172548	36702	178330	97663.1	72091.3	118814	381104	423079	79634.2	116309	223788	164177	382889	457218	211313	127274	360643	307868	134774	255477	552364	418543	507814	525768	451993	120800
M640T457			639.567	456.828	66	1.79	110036	77861.6	70784.2	64612.9	38551.4	72369.3	25764.8	132358	111110	17658.9	330030	135973	145426	113843	50914	52302.4	419403	72384.9	174353	153871	156910	170154	177025	159384	149286	399570	211084	105894	146633	183225	37553.5	116240	196589	136048	63435.8	582904	470098	618133	396372	438645	501230	95155.5
M569T395_2			569.489	395.471	67	1.79	51891.3	74643.1	49500.3	64249.7	55852.1	59227.3	10279.7	36805.5	57087.2	35043.3	45011.3	43162.9	43422	8707.94	27464.9	22880	58795.7	24816.4	174629	61717.3	64809.2	247673	373231	270426	682014	1.01026e+06	516722	325785	561569	298701	448369	821378	609151	547834	194123	158807	157046	78790.9	80652.9	212601	137580	57346.7
M391T136			391.14	135.69	68	1.78	27325.8	9179.37	7705.28	6318.86	8257.69	11757.4	8764.51	70949.5	38122.8	50806.6	21861.2	57520.3	47852.1	18747.5	116561	108602	76893.4	54707.4	13552.6	74063.2	41961.7	255.416	4649.67	4517.49	17895.9	45490.7	14561.8	18517	114609	58539.5	85708.8	105804	30418.6	79015.9	34677.9	6567.51	6351.76	4859.46	6712.42	5614.2	6021.07	774.724
M382T261			382.154	260.693	69	1.78	72276.1	54008.1	59648.1	68273	59355.1	62712.1	7396.13	77953.9	82785.8	84392.8	97693.4	102897	89144.7	10612.1	81239.6	48100.6	100994	77620.8	79868.8	77564.8	18946.5	462393	319383	373715	423225	450337	405811	59134.2	458134	445376	464019	442919	332371	428564	54482.3	347386	327705	304104	347100	338940	333047	18055.8
M120T60			120.045	59.547	70	1.77	43898.5	44188.8	41153	43743.9	72382.3	49073.3	13087	41272.2	36968.4	73033.7	49999.8	48365.6	49927.9	13957	70835.3	96452.3	115093	80287.9	77913.5	88116.3	17756.9	29106.4	21179.4	18925.5	46800.3	63590.7	35920.4	18951.1	129478	116883	132239	125685	70200.5	114897	25648.8	63491.3	64954	57537.7	72459.3	66706.6	65029.8	5397.06
M692T461			691.598	460.558	71	1.77	81768.8	93227.2	81260.6	85761	51154.5	78634.4	16090.4	185872	351934	59840.8	313415	204577	223128	115258	117385	99993.9	324876	107899	298859	189802	111978	81512.7	142059	125710	201685	325622	175318	94410.2	137951	191751	167284	136841	221391	171044	36203.5	446569	270728	364476	212239	237625	306327	97325.4
M351T411_1			351.25	411.44	72	1.77	56480.6	75196.6	52043	71207.1	56472.3	62279.9	10230.9	56735.3	159748	69761	71302.4	114507	94410.6	42525.9	47758.5	52771.6	137732	111832	156162	101251	49167.4	382918	484658	450501	573024	503256	478872	69829.6	632839	505722	547804	640569	633522	592091	61538.5	879744	87317.9	386483	124936	30093.9	301715	350820
M677T400_1			676.503	399.971	73	1.75	29209.1	41225.2	34944.2	61720.9	3454.43	34110.8	21080	23584.3	196218	22158.3	71634.5	97667.2	82252.5	71399.9	49640.6	12649.1	191987	150887	253316	131696	99624.2	341541	436449	446864	312402	342701	375992	61271.5	476625	416276	461152	303171	459903	423426	70881	426450	346584	560244	635959	8696.57	395587	243890
M239T289			239.119	289.284	74	1.75	4322.36	2990.91	2283.58	350.088	2173.08	2424	1441.26	4342.73	3849.66	476.588	5550.84	498.074	2943.58	2326.1	3899.07	3392.97	6024.16	9803.78	3132.79	5250.55	2788.03	3326.36	3003.66	2611.06	10684.8	5844.37	5094.05	3371.92	150534	96466	125748	187763	38530.4	119808	56453.8	85321.1	57464.1	60128.4	62622.4	56237.9	64354.8	11977.2
M357T427			357.3	426.524	75	1.74	36638.9	41570.5	37874.4	44262.9	19404.4	35950.2	9729.2	56081.8	119654	83578.5	74524.4	94072	85582.1	23608.9	92161.6	60730.1	150557	207708	201419	142515	65208.8	87732.8	71245.9	83838.4	55742.3	45300.5	68772	18119.8	170779	134404	239965	103022	70553.7	143745	65367.4	587952	738501	928448	56128.4	26328.2	467471	407518
M349T366			349.235	365.917	76	1.73	29530.3	36439.8	59746.2	51902.1	61710.6	47865.8	14281.6	2990.99	2340.6	2908.2	2047.3	3430.77	2743.57	549.485	1722.71	4343.28	1972.64	5965.75	1536.21	3108.12	1960.31	32527.4	19782.2	37544.3	26471.6	20915.4	27448.2	7584.98	8223.26	8371.28	6927.1	12520.3	7205.73	8649.54	2252.41	4708.82	5048.97	4302.53	4577.13	4920.7	4711.63	292.817
M397T525			397.383	525.011	77	1.73	19686.7	673.802	883.742	985.181	1393.43	4724.58	8368.19	936.024	13398.3	1369.19	306.342	469217	97045.5	208122	732.186	776.362	677.37	478.765	1394.35	811.806	344.941	3212.97	3942.34	4716.2	1627	6402.39	3980.18	1770.33	1503.72	753.5	1994.07	869.623	1012.77	1226.74	515.458	748.846	413.336	1202.9	528.931	943.108	767.424	317.452
M197T65			197.09	64.955	78	1.73	605.734	5294.16	3914.15	4551.78	3929.66	3659.1	1798.03	2300.44	2181.28	4877.38	3984.38	4134.76	3495.65	1195.05	145349	3625.51	4065.73	4689.88	4415.4	32429.1	63125.5	5300.33	6292.07	474344	392626	4771.01	176667	236216	12207.9	7641.17	7440.56	7751.98	6165.12	8241.34	2306.78	5479.95	5547.09	6411.92	6623.16	5807.42	5973.91	516.542
M182T345			182.102	344.963	79	1.71	54307.6	58936.9	62104.6	56170.9	61507.6	58605.5	3360.64	7109.32	4963.24	5880.59	5621.36	6559.06	6026.72	832.477	6143.54	4718.14	6480.81	37424.1	4346.59	11822.6	14340.4	77453.5	62555.2	76501	66948.3	73866.4	71464.9	6457.08	85152.5	89700.7	78388.4	83880.4	69920.7	81408.5	7582.53	32648	27910.2	23729	22874.5	25488.9	26530.1	3925.15
M341T320			341.353	320.473	80	1.7	9794.79	96332.3	18440.7	81502.1	179344	77082.7	68581.9	13702.5	6192.79	9835.26	8403.74	16191.4	10865.1	4042.58	17591.3	13856.6	29417.2	37014.2	9160.37	21407.9	11503.2	49248.3	16388.6	42005.8	38112.2	38729	36896.8	12289	26945.7	100806	109109	33377.6	50108.8	64069.5	38383.6	16959.4	40892.9	45440.3	11224	10626.9	25028.7	16818.1
M344T199			344.064	199.08	81	1.7	5845.81	2889.95	4823.46	4404.89	3851.39	4363.1	1100.47	42422.7	31541.7	47600.4	25615.8	29903.4	35416.8	9205.96	62227.2	49012	42370.8	80068.3	16331.7	50002	23697.8	1125.85	1245.72	1040.04	2239.51	18209.4	4772.1	7527.18	80992.2	55035	74598.4	73291.7	22354.1	61254.3	23793.2	19368.6	21005.9	14330.4	22990.1	17834.7	19105.9	3285.86
M301T97			301.126	97.377	82	1.7	84070.3	104474	119308	132809	95600.1	107252	19231.4	76683.4	86397.1	99665.2	77175	94610.5	86906.2	10266.6	111689	88423.1	141502	117062	96600	111055	20522.2	618563	411723	501314	630358	546137	541619	89878.9	575353	531387	479065	614764	510455	542205	53561.4	304796	359713	299472	331405	287283	316534	29026.1
M435T462			435.272	462.054	83	1.69	84987.2	15568.7	24022.7	17143.4	49316.6	38207.7	29449.8	34225.4	6374.85	10238.4	19368.6	7591.12	15559.7	11609.2	68780.6	88684.9	43605.2	80649.8	4688.86	57281.9	33976.1	126416	5816.7	7146	6774.49	23334.4	33897.5	52228	3377.64	7716.3	9628.77	14190.2	31011.4	13184.9	10695	10302.8	723.877	2076.14	2124.24	834.57	3212.33	4018.59
M279T51			279.135	50.835	84	1.69	15003.2	62316.5	86391	67031.5	56139.4	57376.3	26251.2	83949.4	60216.7	98314.6	110089	71925.3	84899	19955.9	89754	127763	106101	130816	155286	121944	25057.2	47649.8	50580.4	35437.6	26337.5	55568.9	43114.8	11956.4	85942.9	94894.9	94251.7	71164.8	77213.3	84693.5	10439.9	67917.2	63039.7	57228.6	67884.2	68078.1	64829.6	4753.82
M328T318			328.341	318.047	85	1.69	4642.14	25924	13767.8	111339	151278	61390.4	65804.5	13663.6	6063.52	11360.5	7426.92	13843.7	10471.6	3572.51	16897.1	12232.2	24629.5	60394.4	3802.75	23591.2	21914.5	29315.4	8668.08	22369.8	23116	49221.2	26538.1	14753.5	44434.4	107705	238611	55199	22368.7	93663.5	86880.4	34724.1	85902.3	87614.9	18912.8	9987.64	47428.4	36985
M512T400			512.373	399.86	86	1.69	76766.6	97135.4	83317.6	128194	13418.3	79766.3	42043.3	75592.3	304648	58960.3	149420	185564	154837	98601.4	123204	47070.2	288890	249189	314678	204606	114729	275018	385553	412511	210205	184919	293641	102111	340244	317913	325164	170645	365020	303797	76586.3	506716	318484	273254	311921	308981	343871	92719.9
M256T131			256.077	131.21	87	1.67	79048.6	10883.4	18994.4	13877.2	25161.6	29593	28173	21940.7	15444.8	32315.1	7983.93	15208.7	18578.6	9129.87	49564.2	88880.2	37575.9	75695.3	13682.4	53079.6	29991.7	24845.6	14643.6	17064.9	84186	20769.9	32302	29259.7	10409.1	9144.5	14995.9	12583.8	6753.86	10777.4	3164.24	5928.02	5629.62	4729.74	727.517	693.22	3541.63	2621.97
M323T372			323.22	371.604	88	1.66	15049.1	12366.4	10973.6	10880	8019.29	11457.7	2555.11	15294.5	22599.8	17008.6	17614.7	18796.7	18262.9	2733.99	19776.9	12724.2	29163.9	26451.4	34216.3	24466.6	8380.6	83562.3	82050.3	72518.1	80631.2	100677	83887.7	10310.4	150869	104331	132630	142481	165481	139158	22894.4	355640	251552	341314	233851	253180	287107	56759.6
M299T402			299.259	401.946	89	1.65	119923	249844	350004	290151	237206	249426	84697.8	178982	106575	200152	193156	153916	166556	37908.4	201093	173551	133752	151564	75439.4	147080	47297.6	340369	88512.2	103287	248087	46574.4	165366	123835	175197	271888	206895	145951	118050	183596	59418.6	61109.5	4964.87	33223.1	12485.5	5020.87	23360.8	24058.6
M478T375			478.341	374.704	90	1.65	35734.7	19284.7	18695.4	26432.6	5594.29	21148.3	11091.7	47194.1	42212.7	37278.3	30215.5	38162.8	39012.7	6290.79	12540.3	11835.7	13279.7	13693.4	9681.61	12206.1	1580.08	79254.9	80086.7	78609.3	60347.2	13342.8	62328.2	28593.9	92216.5	93674.8	87701	85940.2	832.258	72072.9	39950.5	3055.85	1945.56	13128.9	1785.79	1989.74	4381.17	4915.95
M189T114			189.102	114.158	91	1.64	23879.5	5457.55	11594.6	13698.9	13501.6	13626.4	6633.36	9381.58	5493.05	18847.4	8721.69	4271.4	9343.03	5728.55	32052.1	63733.4	16783.3	49266.7	14676.6	35302.4	21108.4	7544.82	17758.7	7826.25	29031.7	16656.5	15763.6	8822.84	9408.94	21866.7	8651.56	9133.3	12352.7	12282.7	5550.24	4983.3	3270.03	2931.52	5431.26	3806.84	4084.59	1082.99
M650T418_1			649.551	417.824	92	1.63	7.97944e+06	6.33299e+06	5.41468e+06	6.92621e+06	4.39344e+06	6.20935e+06	1.37763e+06	3.83092e+06	8.03417e+06	2.13548e+06	5.88254e+06	5.95363e+06	5.16735e+06	2.25425e+06	4.6986e+06	3.77427e+06	7.96609e+06	6.12327e+06	9.23836e+06	6.36012e+06	2.25648e+06	1.2474e+07	1.4658e+07	1.29545e+07	1.75689e+07	1.59979e+07	1.47307e+07	2.11623e+06	1.65219e+07	1.50652e+07	1.61923e+07	1.69138e+07	1.52787e+07	1.59944e+07	796621	1.35155e+07	1.28708e+07	9.43656e+06	8.58826e+06	1.0533e+07	1.09888e+07	2.13928e+06
M303T427			303.29	427.052	93	1.62	8577.87	14033	15230.8	39423.5	31676.3	21788.3	13099.9	22487.7	8106.49	15849.8	15324.7	38352.8	20024.3	11440.6	13226.8	16334.8	10566.4	37372.4	3663.47	16232.8	12708.5	16640.7	27435.2	31196.3	30007.3	6796.62	22415.2	10455.1	4870.44	5828.08	22771.2	5468.59	15313.9	10850.5	7936.88	63945.6	383039	279643	65401.2	287520	215910	143934
M271T263			271.275	263.213	94	1.62	18023.4	31471.9	75795.2	83077.8	270138	95701.3	101419	52736.6	18572.3	33576.9	57127.9	46504.9	41703.7	15682.7	125663	24233.1	57186.4	72550.3	14578.2	58842.2	44194.9	82937	19929.6	65581.2	59525.4	77512.6	61097.2	24818.3	94119.8	335253	203956	155839	59651.7	169764	107931	41253.3	606105	595236	95056.3	51070.6	277744	295510
M652T427			651.566	427.344	95	1.62	8.4871e+06	9.51758e+06	6.48449e+06	9.19467e+06	6.53105e+06	8.04298e+06	1.45025e+06	6.80747e+06	1.20689e+07	3.0147e+06	8.92766e+06	8.72085e+06	7.90792e+06	3.323e+06	5.80766e+06	5.36593e+06	9.07418e+06	8.72744e+06	1.06507e+07	7.92518e+06	2.25975e+06	1.58176e+07	1.88359e+07	1.60753e+07	1.50545e+07	1.50018e+07	1.6157e+07	1.56912e+06	1.7008e+07	1.42011e+07	1.75614e+07	1.5166e+07	1.51854e+07	1.58244e+07	1.40488e+06	1.62215e+07	2.55118e+06	6.21098e+06	5.47844e+06	2.90487e+06	6.67339e+06	5.5678e+06
M167T259			167.013	259.185	96	1.62	41426.7	1.28679e+06	270945	156326	231005	397299	504860	160896	173628	141225	269843	144024	177923	53041.3	219250	234063	265235	345161	275045	267751	48834.1	89373.9	105318	119737	196320	148291	131808	42075.9	118592	132365	91150.2	102533	111179	111164	15650.1	91520.1	92645.1	110883	97379.6	99518.1	98389.1	7722.66
M199T60			199.056	59.9215	97	1.6	85158.9	43410.6	46342.6	42778.9	18227.4	47183.7	24056.8	5190.82	3198.24	4204.14	4108.87	3464.97	4033.41	773.802	4366.95	5239.26	3418.35	3333.94	2606.36	3792.97	1022.29	34121.4	20364.6	33274.2	131571	121872	68240.6	53772.4	9558.48	8934.8	10694.7	9961.97	15266.6	10883.3	2532.27	2048.66	2168.09	2520.28	2771.06	2412.58	2384.14	286.477
M178T132			178.05	131.609	98	1.6	35952.2	8642.19	14880	14779.2	18416.9	18534.1	10352.6	50212.5	30363.7	47839.8	26089.5	45323.7	39965.8	10959.6	79699	76853.9	76741.7	92304.3	48924.3	74904.6	15873.6	83252	60488.1	66696.9	124662	92745.5	85568.8	25349.1	206493	149935	193361	202205	98742.4	170147	45811.5	84963.4	90642.6	84399.5	99128.8	85921.6	89011.2	6168.98
M331T401_2			331.275	400.856	99	1.6	9098.52	9408.76	7473.41	10365	1563.85	7581.91	3521.79	9032.99	23409.6	11009.5	12156.4	16506.1	14422.9	5721.45	11195.3	7605.11	21880.9	20454.2	30612.5	18349.6	9136.54	50447.4	56490.6	46434.7	52578.8	55564.5	52303.2	4066.01	75975	63396.1	72359.3	77969.7	65587.6	71057.6	6369.28	112438	381060	105748	286448	437672	264673	151972
M560T377			560.387	377.243	100	1.59	28736	24692.9	27389.2	28848	26580	27249.2	1715.27	23067.9	20763.1	24913.4	24114.6	21805.7	22933	1681.95	6611.07	6860.91	8361.2	7649.24	6890.4	7274.56	721.124	126043	98061.4	104206	114913	15520.6	91748.9	43927.4	196925	115843	121710	118518	104243	131448	37191.7	14260.1	14615.3	12433.4	16448	5265.75	12604.5	4342.92
M363T364			363.214	363.547	101	1.58	33656.2	15523.1	14123.6	13385.4	12681.8	17874	8885.05	16728.9	25991.7	16683.5	9530.19	17829.8	17352.8	5849.97	11644.2	9218.73	13262.1	14058.4	6501.06	10936.9	3093.53	13464.2	19591.6	13023.1	28264.6	39444	22757.5	11179.4	99151.3	121304	113416	121197	47498.2	100513	30979.7	48513.6	30202.8	31481.8	33097.5	14832	31625.5	11952.4
M104T43			104.071	43.07	102	1.57	4506.27	12517.1	10370.1	8898.82	7793.84	8817.23	2989.1	10552.3	7426.68	9894.05	9784.28	8969.14	9325.3	1201.19	424003	8817.01	8997.54	11832.8	13134.3	93356.8	184846	14723.3	12860.4	16992.4	9951.1	22973.4	15500.1	4910.2	18977.8	14619.1	29122.1	28378.7	32810.8	24781.7	7635.54	21261.1	17190.1	19737.3	23551.7	24331	21214.2	2896.32
M307T400			307.227	400.447	103	1.57	33244.6	41870.3	71567.7	74383.8	31608.5	50535	20877	26884.8	15044	25100.5	13500.8	45860.7	25278.1	12939.3	15283.9	18487.7	18591.8	40648.2	6904.01	19983.1	12493.6	50232.8	75492	82924.8	39751.5	180495	85779.2	55828.2	144708	233425	120893	234856	205670	187911	52317.7	150493	6483.11	134867	8853.37	10993.8	62338.2	73567.1
M291T358			291.194	357.671	104	1.57	43487.9	16022.5	30762.8	26843.2	43569.3	32137.1	11716.8	27570.7	15614.6	33466.8	15860	30336.2	24569.7	8328.74	22030.2	29533.2	25412.1	25571.7	9529.75	22415.4	7677.8	293117	70394	256709	122170	50153.8	158509	110214	39031.1	66185.3	92003.6	44673	32611.5	54900.9	24275.6	22729.3	26284.7	32299	29670	21368.7	26470.3	4589.86
M668T410			667.561	409.759	105	1.56	51138.9	80138.8	63082.3	90456.2	77966	72556.4	15456.6	34402.7	89381.9	18010.8	58078.2	54002.8	50775.3	26906.3	36739.7	26487.4	71712.5	27874.9	93104.7	51183.8	29751.6	262380	294285	215200	405923	358317	307221	75826.7	374313	300376	317050	405126	401094	359592	48293	304213	285904	213070	179595	204054	237367	54456.1
M271T376			271.228	375.789	106	1.55	43251.2	56064.9	70309.7	52312.9	46962.3	53780.2	10463.5	48925.2	27227	46510.9	39849.4	37053.6	39913.2	8571.3	44029.6	44472.3	38540.9	47833.7	21528.9	39281.1	10468.2	166991	90453.8	93291.7	283593	72596.6	141385	87346.4	213306	213087	212325	207250	179998	205193	14300.5	40559.9	7385.01	23703	12364.4	6276.82	18057.8	14346.8
M317T152			317.121	152.274	107	1.55	6664.08	5898.94	879.504	1554.88	4954.68	3990.41	2613.92	22144.5	20077.7	13170	8709.03	13640.9	15548.4	5479.41	14371.7	22663.1	10103.8	9513.55	6286.57	12587.7	6324.97	13310.4	16758.8	12073.4	12213.1	32973.5	17465.8	8873.08	102466	74849	85887.1	95708.9	51303.5	82042.9	20095.4	141334	137191	125832	126023	147204	135517	9449.28
M324T477			324.327	477.043	108	1.55	29880.9	11738.3	146261	234599	131063	110708	91317.1	87716.6	115640	29095.1	46464.5	200747	95932.5	67742.5	145069	46561.7	66346.1	979364	6930.79	248854	411453	1179.46	1520.49	1785.37	1763.92	3288.66	1907.58	809.776	1200.83	773.08	2093.93	2152.82	1402.55	1524.64	592.305	1270.18	1387.89	2040.93	346.156	369.124	1082.86	724.254
M652T442			651.566	442.298	109	1.54	4.74953e+06	5.04272e+06	3.10044e+06	4.79985e+06	2.7056e+06	4.07963e+06	1.08878e+06	4.01001e+06	5.46759e+06	2.04255e+06	4.44676e+06	5.4136e+06	4.2761e+06	1.39663e+06	3.13801e+06	3.28575e+06	7.10044e+06	3.75535e+06	5.92634e+06	4.64118e+06	1.77349e+06	5.53659e+06	9.61969e+06	1.23906e+07	4.6712e+06	5.79906e+06	7.60342e+06	3.28282e+06	9.7176e+06	8.60483e+06	8.69202e+06	1.21931e+07	5.02817e+06	8.84714e+06	2.57975e+06	9.19724e+06	1.12747e+07	1.18892e+07	1.8493e+07	1.21963e+07	1.26101e+07	3.49037e+06
M569T387			569.293	387.377	110	1.53	47129.7	46928.8	68585.3	67875.7	76088.4	61321.6	13438.2	38567.9	49815.7	32997.1	54966.9	46097.1	44488.9	8773.09	57048.3	44023.8	64922.2	42373.1	41738.4	50021.2	10422.2	238075	174181	140226	103953	127246	156736	52078.3	192088	244788	219222	171805	173862	200353	31287.4	47143.4	5338.65	25003.9	19554.7	2177.32	19843.6	17989.5
M353T402			353.256	402.406	111	1.52	17467.3	24314.3	23105.2	21536.8	2368.44	17758.4	8983.05	20156.3	42580.5	21213.1	25341.1	23734.2	26605	9161.26	3279.02	17327.2	39442.2	29549.2	48504.2	27620.4	17875	51054.9	60233.1	52162.7	39116.1	44913.6	49496.1	7961.92	58530	56767.4	61409	50867	62493.2	58013.3	4595.92	78917	393914	82146.5	336111	414336	261085	167304
M399T506			399.362	505.603	112	1.52	2075.24	20694.9	3402.07	3003.16	3586.54	6552.38	7927.38	1989.74	6710.23	1408.51	2501.97	2582.57	3038.6	2105.6	1415.75	2820.7	3168.39	3488.56	2042.25	2587.13	847.645	3060.09	4183.03	4310.37	7574.05	3471.2	4519.75	1782.98	4680.33	6906.78	5729.91	4268.71	9460.12	6209.17	2084.93	2718.97	2030.2	3362.25	1204.16	981.325	2059.38	1003.37
M353T498			353.361	498.105	113	1.51	33148.1	7080.89	97833.8	141206	62546.2	68362.9	52924.5	67412.4	54367.4	6263.78	26443	84576.5	47812.6	31470.9	92675.4	27419.1	29552.4	607516	2777.98	151988	256805	560.126	369.247	323.103	594.545	1007.76	570.957	270.921	510.227	278.672	451.611	541.924	442.75	445.037	101.689	422.471	415.244	370.296	95.5262	182.033	297.114	149.085
M390T421_1			390.298	421.122	114	1.51	70222.5	40664.1	41852.1	30783.1	64192.6	49542.9	16823.9	19577.2	3589.99	12714.3	11222.3	11822.5	11785.3	5680.18	42737.2	48687.5	28643.4	33717.7	4589.87	31675.1	17020.3	89305.9	13750.7	21953.9	15972.8	32139.9	34624.6	31386.2	42535.2	67940.5	68833.9	38580.2	31481.8	49874.3	17360.6	22929	2562.33	18987	3356.77	1366.77	9840.37	10268.7
M352T402			352.254	402.267	115	1.51	125354	179253	177773	173338	75308.4	146205	45513.6	158839	312079	167232	189156	206365	206734	61768	200673	134198	310329	244792	363492	250697	89983.3	391444	435129	397534	286420	335602	369226	58364.2	440732	428180	413670	391490	441194	423053	20929.7	318410	59129.2	607653	50867.7	52349.8	217682	246234
M104T44			104.052	44.364	116	1.51	75388.9	6822.18	13343.7	7286.25	7970.88	22162.4	29869.9	257628	229944	4456.72	5699.01	7032.7	100952	130759	166930	6459.76	6339.09	8834.94	6837.02	39080.2	71477.5	17338.6	11645.8	3719.82	3406.77	15189.1	10260	6443.28	18259.7	18278.9	17221.7	18280.7	23979.5	19204.1	2708.1	23790	15871.1	26793.5	24961.6	31761.7	24635.6	5767.93
M570T394			570.458	394.195	117	1.51	17957.5	27839.1	3022.93	22778.8	20548.8	18429.4	9347.91	10814.9	1183.62	8174.94	1619.41	4715.67	5301.71	4168.7	2758.13	7115.6	22779.7	8580.84	66426	21532.1	26196.6	96021	146065	105148	264949	384053	199247	123297	215793	113400	174288	307395	234790	209133	72001.8	59894.8	45410.9	17119.3	56295.8	51306.3	46005.4	17041.6
M652T417			651.557	416.73	118	1.5	736053	650696	557908	723822	464025	626501	115284	422202	813221	236500	586571	577467	527192	214121	462951	398972	765344	614647	896874	627758	206779	1.25105e+06	1.63646e+06	1.30216e+06	2.01873e+06	1.59268e+06	1.56022e+06	307927	1.69593e+06	1.48113e+06	1.59648e+06	1.70106e+06	1.66045e+06	1.62701e+06	91604.4	1.37048e+06	1.32875e+06	907011	948360	939287	1.09878e+06	229970
M313T294			313.322	294.319	119	1.5	9730.48	62271.6	22906.9	69199.1	133127	59447.1	48318.7	18974.9	6750.26	6922.39	15813.4	20617.7	13815.7	6601.39	19930.7	13345.7	28287.4	27231.2	6833.42	19125.7	9148.65	35569.3	18121.2	26294.5	30861.9	27698.5	27709.1	6435.3	22678.8	116298	61441.8	26101	55663.8	56436.7	37646.1	12868.8	41047.3	43328.7	9877.85	9769.26	23378.4	17234.6
M351T401			351.251	401.389	120	1.5	549963	861545	775823	860065	347501	678980	224736	691112	1.32123e+06	740585	837739	866419	891416	250557	869491	597036	1.36061e+06	1.18087e+06	1.55678e+06	1.11296e+06	383527	1.71128e+06	1.84426e+06	1.71599e+06	1.26463e+06	1.42295e+06	1.59182e+06	239263	1.87095e+06	1.81119e+06	1.78282e+06	1.63309e+06	1.86393e+06	1.7924e+06	96320	1.39009e+06	251047	2.67321e+06	2.26693e+06	240899	1.36443e+06	1.12138e+06
M312T386			312.254	386.32	121	1.5	28860.8	37276.9	34156.8	31721.3	32020.4	32807.2	3129.34	23478.8	13258	28099.7	19802.5	15785.3	20084.8	5935.67	28554.2	22683.1	28066.8	20898.7	13883.8	22817.3	5999.51	124773	56984.2	52664.7	66366.2	73763.7	74910.3	29055.1	97336.1	117164	106730	114590	80870.7	103338	14748.4	25658.5	779217	14823.3	412553	555928	357636	334588
M610T406_1			609.52	406.282	122	1.49	38415.3	57343.2	35589.5	53218.8	33137.5	43540.8	10976	892.967	181843	65100.1	137255	782.133	77174.5	81187.3	58603.7	26613.7	190356	35351.7	293299	120845	116870	142707	184349	117345	306925	386520	227569	114871	253334	174983	273360	236830	243645	236431	37005	239084	379830	289967	244307	295247	289687	56517.4
M736T427			735.575	426.89	123	1.49	7116.82	11642.7	7324.02	6922.56	2179.18	7037.06	3350.86	16284.2	50980	14265.8	23273.3	17274.7	24415.6	15224.2	30154.1	13483.2	67007.7	52330	107044	54003.8	36041.2	19815.4	24528.2	25540.3	6834.15	10780.7	17499.7	8341.35	65687	59602.7	101830	22349.4	22066.3	54307.1	33454.2	208870	171864	120395	172446	2994.55	135314	80399.4
M219T51			219.113	50.638	124	1.48	34713.7	3693.01	26376	24080.8	15290.3	20830.8	11815.7	9852.69	4021.06	10245.7	5246.18	7989.9	7471.1	2761	32938.3	76456.2	11412.9	67926	1075.85	37961.9	33430.3	38107.4	30203.3	33463.7	128161	88784.7	63744	43231	73997	47179.9	69111.5	59445	9549.55	51856.6	25774.4	7090.09	16013	14572.3	9306.02	8742.04	11144.7	3906.47
M513T400_2			512.875	400.035	125	1.48	50968.6	63732.5	55512.2	79118.8	8614.2	51589.3	26305.7	48453.9	200840	38159.1	95027.2	120434	100583	65365.4	80123.6	31006.9	188177	161340	202773	132684	74016.9	178330	250332	264207	136059	110589	187903	67964.4	215171	207238	204839	100055	227445	190950	51572.2	180594	203942	36207.8	184968	15960.6	124335	90402.1
M337T352			337.105	352.326	126	1.48	1293.72	1035.31	1597.6	1588.25	1158.34	1334.64	252.894	853.323	1765.39	1392.83	1303.19	1570.24	1376.99	342.097	1486.79	1043.75	527.817	1288.54	732.602	1015.9	392.215	78097.8	77015.4	65930.2	27619.4	14823.6	52697.3	29474.5	3577.36	3676.95	3882.43	3596.12	2664.23	3479.42	471.484	23083.6	23080.5	21987.2	24272.6	23867.9	23258.3	877.245
M348T392			348.204	391.793	127	1.48	1685.96	4016.41	12530	531.561	15165.1	6785.8	6633.28	1189.01	7456.69	793.783	10374.8	1251.33	4213.13	4418.61	55756.6	1364.73	16047.1	5786.89	20060.3	19803.1	21466.6	1787.53	1291.75	1155.63	308.216	1083.91	1125.41	533.036	626.657	777.826	1098.48	710.716	756.572	794.051	179.799	885.217	203043	598.34	285115	218109	141550	132200
M301T371			301.238	370.921	128	1.47	6829.48	4518.8	3585.83	3733.79	2550.76	4243.73	1606.3	5344.68	10192.8	5530.07	6922.59	8241.05	7246.24	2021	8902.84	4700.13	12932.3	10682.9	14060.5	10255.7	3691.8	28283.7	28142.4	25657.4	40228.5	40143.6	32491.1	7101.78	65170.9	40179.2	57677.4	72251.5	63146.9	59685.2	12088.2	186458	149494	203665	113635	121261	154903	39489.1
M317T328			317.147	327.554	129	1.46	8055.91	2048.22	1910.15	1859.82	2367.31	3248.28	2694.81	4850.26	3858.57	5698.16	1792.31	5879.22	4415.7	1670.93	17025	14047.3	14160.4	23578.6	6017.95	14965.9	6324.11	88492.8	25342.4	36666.6	140288	43253	66808.6	47571.8	212045	151164	212049	295140	74767.4	189033	81866.6	86106.5	83924.5	70537.9	60077.5	67745.9	73678.5	11062.1
M298T382			298.275	382.444	130	1.45	119341	122089	75048.9	85436.8	170898	114563	37625.7	131883	113693	94603.4	148731	186690	135120	35199.1	183585	143229	245943	179016	298998	210154	61904	134941	89857.5	76582	146003	704105	230298	266479	176637	112614	162027	408747	340469	240099	127369	265495	14528.2	248176	26558.6	4316.66	111815	132760
M291T276_2			291.113	276.369	131	1.45	117387	10616.3	57930.4	51014.1	50775	57544.5	38314.3	1829.28	1778.88	35946.7	14835	1769.33	11231.8	14925.8	434.299	15180.3	38863.4	1604.51	1635.81	11543.7	16431.4	5244.59	34992.9	3606.25	74598.9	61487.4	35986	32154.9	5858.67	6206.53	6068.06	5368.21	5747.16	5849.73	323.048	4426.93	4272.43	4520.2	4995.41	3972.53	4437.5	374.717
M120T243			120.045	242.876	132	1.44	760186	72631.9	152428	126202	318171	285924	280531	254379	186607	262974	150583	168517	204612	51061.5	318032	309588	171522	233789	74934.2	221573	101499	141967	325122	175561	610449	488028	348225	200746	231935	342973	310019	273190	355413	302706	50824.8	80737.6	89930.8	69009.3	81137.6	66142.7	77391.6	9737.3
M513T360			513.304	360.149	133	1.44	132167	108843	151858	137692	142138	134540	16074.5	80640.6	35354.7	122322	76143.5	90257.7	80943.7	31226.6	121644	52468	85959	79370	35300	74948.1	33161	373427	109116	73023.5	68361	274475	179680	137177	140858	108575	83927.2	170403	272175	155188	73098.8	35608.2	20304.2	19208.2	16900.9	14313.2	21267	8340.47
M398T133			398.149	133.161	134	1.44	34701.1	23071.5	27005.8	33247.3	32752.3	30155.6	4926.18	27743.7	30245	38472.1	39083.5	46390.9	36387	7485.47	33020.2	19367.8	44642.7	32077.9	31359.4	32093.6	8955.8	213886	112494	160968	173197	219937	176096	43682.5	170464	175227	181115	183420	101392	162324	34437	134815	134287	120999	139543	135536	133036	7039.34
M660T470			660.46	469.94	135	1.44	3649.3	2598.05	2185.35	2795.64	1628.18	2571.3	750.261	4830.49	7011.26	5376.95	5825.35	5333.75	5675.56	825.633	6222	3742.82	10041.3	9094.45	17811.5	9382.42	5323.53	18607.8	21770	18887.7	6212.25	5144.82	14124.5	7817.93	25783.7	34346.2	34649.1	5779.25	13745.6	22860.8	12789.5	171090	154925	115697	279106	26781	149520	91509.4
M130T43_3			130.098	42.826	136	1.43	64975.9	7666.14	11646	9999.01	16581.8	22173.8	24149.7	21077.7	15266.7	15270	10881.5	16501.3	15799.4	3643.6	24188.8	18551.9	17641.3	23928.2	12684	19398.8	4805.07	103875	70427.1	100326	167612	160789	120606	41932.7	75475.7	56717	84736.8	74353.1	41169.1	66490.3	17408.2	44701.5	60158.4	52524.5	60534.2	51543.3	53892.4	6618.91
M357T362_2			357.261	362.117	137	1.43	64840.9	28507.9	29233.5	54469.9	63764.5	48163.3	18069.2	32942.5	29525.3	40141.7	35540.2	98124.6	47254.9	28699.9	28058.9	25490.1	28772.9	52884.4	24607.9	31962.9	11822.8	66309.1	143907	232053	198247	95006.7	147104	69072.4	80973.6	40647.9	51056	88927.1	144672	81255.3	40747.9	133001	179531	182766	70453	448721	202894	144748
M674T481			674.475	480.623	138	1.43	3785.08	1947.51	2078.79	2954.95	1587.83	2470.83	890.065	4634.51	8266.25	4141.52	6296.72	7097.45	6087.29	1710.9	5202.79	3559.64	13691.7	10021.7	22115	10918.2	7427.65	11906.6	24525	14250.2	7740.66	7585.54	13201.6	6934.67	35654.1	32185.2	40059.7	7763.41	15209.3	26174.3	13946.3	218539	325986	256481	18731.2	38571.3	171662	136298
M275T396			275.259	396.037	139	1.43	18553.6	29463.2	28827.4	61794.7	36452	35018.2	16273.5	41813.9	23618.5	36247.4	36677	73692	42409.7	18727.6	23989.7	26372.3	33294	58508.8	17685	31969.9	15852	160753	351041	216138	297817	104564	226062	99867.6	59549.8	56974.6	153496	173748	351952	159144	120185	308455	14226.5	519897	207494	15203.6	213055	213285
M340T398_1			340.254	397.886	140	1.42	73381.6	76472.9	60197	73443.6	19947.7	60688.6	23627.3	60479.5	172199	48338.4	103637	118710	100673	49508.9	94179.2	49081	165164	148828	169696	125390	52181.2	103873	79443.5	109348	64134.4	77111.7	86782.2	19115.6	73432.8	91092.2	76949.8	70184.1	80743.9	78480.6	8075.11	96942.5	126443	88504.1	143364	129784	117008	23248.6
M368T421			368.316	420.674	141	1.41	67469.1	32138.8	40058.7	34251.5	76767.4	50137.1	20539.2	18897.5	2814.95	24485.8	10416.4	14671	14257.1	8246.28	44553.2	55136.7	30982.7	45080.1	4389.16	36028.4	19661.1	129042	14348	26532.5	16146.3	37358.6	44685.4	48046.9	56936.8	94687.4	107465	50845.3	35562.5	69099.4	30547.2	46516.5	5116.1	39354.8	6399.61	3103.3	20098.1	21033.8
M355T396			355.282	395.703	142	1.41	18507.5	39616.7	31030.1	38764.3	30305.1	31644.7	8499.99	26126.9	20687.4	16943.6	22503.2	69094.9	31071.2	21512	37156.8	31778.5	22007.2	64254.2	19021.2	34843.6	17992	14524	15533.1	19073.5	25692.5	29563.3	20877.3	6534.76	16995	12835	13780.5	19154.5	18577.3	16268.4	2835.76	18555	328626	31730.6	252930	372092	200787	165979
M313T299			313.116	298.858	143	1.41	3621.74	6899.36	1319.77	1950.05	3057.45	3369.68	2170.09	5256.65	4712.24	38732.7	22354.4	3482.24	14907.6	15416.8	27843.6	40283.2	66038.7	15034.9	24905.4	34821.2	19639.7	1618.75	1540.61	1814.27	2220.77	2272.81	1893.44	338.113	5969.47	76701.1	7917.52	10523.2	74941.4	35210.5	37112.7	4780.68	3634.78	7014.48	4109.97	3535.85	4615.15	1428.76
M356T380			356.28	380.353	143	1.41	20450.3	34609.4	44799.3	41308.2	34254.9	35084.4	9329.84	26248.2	19936.6	34124.3	26615.6	22397.5	25864.5	5387.38	23513.5	16985.6	22694.2	21664.9	18303.9	20632.4	2843.35	122136	65900.6	60345.9	171885	51993.3	94452.2	51340.7	132309	167294	119983	134076	98139.1	130360	25137.5	12534.2	10223	6438.26	17015.3	9342.32	11110.6	3957.2
M319T242			319.106	242.123	145	1.39	1636.86	1144.32	1257.68	1468.32	1310.72	1363.58	192.181	869.875	828.028	1334.75	1505.12	1227.46	1153.05	295.097	3527.83	3208.83	4834.78	4581.89	2303.38	3691.34	1035.19	3787.48	3126.12	2459.8	4861.54	9893.99	4825.79	2968.7	51419.3	95261	53581.5	91985.8	39470.8	66343.7	25502.4	22084.1	20370.5	18416.6	16937.1	12635	18088.7	3617.57
M331T401_1			331.259	401.421	146	1.39	2969.64	10786.6	19432.4	13547	14389.2	12225	6043.76	8396.4	1027.5	5680.55	7270.64	4268.92	5328.8	2869.2	8535.85	7885.23	13759.2	1426.07	18155	9952.28	6339.42	2271.62	727.709	34374.6	37969.7	940.61	15256.9	19144.4	596.495	45154.6	47482.7	51082.2	382.432	28939.7	26057.2	72988.8	217133	48639.7	74246.5	348113	152224	128135
M657T344			657.469	344.366	147	1.39	5657.67	5335.36	6678.28	5400.67	5510.41	5716.48	551.356	1297.75	673.307	805.637	596.534	1164.44	907.534	308.317	936.724	1081.97	821.794	3541.39	654.185	1407.21	1203.29	143809	128920	105510	81352.7	71603	106239	30600	102326	111697	92599.4	102182	95183.5	100798	7446.14	27565.1	21712.3	15776.1	19237.7	16621.3	20182.5	4739.04
M593T393			593.488	392.76	148	1.39	8539.91	9418.28	9239.76	11616.2	9832.15	9729.26	1153.46	3463.17	10825.6	8228.89	7361.12	5846.65	7145.08	2739.05	5453.93	3751.24	10362.9	7056.23	35093.4	12343.5	12949.2	56904	81159.9	54118.5	234990	226797	130794	92027	150320	82114.7	124947	227204	159443	148806	53100.6	35160.4	15693	14014.2	6045.06	21824.8	18547.5	10859.8
M242T51			242.114	50.598	149	1.37	65046.9	7547.33	687.982	12557.1	17784.1	20724.7	25568.2	1982.15	2196.63	946.103	1231.41	793.184	1429.89	626.841	2184.78	1062.26	897.657	908.126	1245.64	1259.69	536.103	1395.64	36419.4	40886.3	227386	60546.8	73326.8	88721.7	2058.01	2629.45	2465.79	3312.83	3310.65	2755.35	548.888	5974.88	5047.78	5612.79	4873.35	7084.95	5718.75	881.508
M319T396_2			319.285	395.796	150	1.37	14074.9	23272.8	25308.4	54378.1	32345.3	29875.9	15170.6	27377.4	20340.6	23707.6	34994.1	69249.9	35133.9	19833.6	15127.2	18969.5	21098.2	44764.8	12451.3	22482.2	12898.5	81140.5	156579	171819	319383	72946.6	160373	99185.2	44387.1	42150.6	122170	85681	154521	89781.8	48954.9	149723	21456.3	273079	81483.6	14118.4	107972	107236
M739T763			738.505	763.314	151	1.36	6812.79	3989.32	3326.73	2471.81	1750.09	3670.15	1950.55	7655.73	8115.94	11033.8	9634.01	8236.25	8935.15	1386.47	9109.41	3415.07	20584.3	20560.1	42818.8	19297.5	15104.2	33327.7	70106.5	53135.4	12227.4	12763.7	36312.1	25340.6	40271.4	57537.1	71513.5	10482.3	18496.8	39660.2	25660.4	164111	154405	103913	143422	94300.5	132030	31119.3
M707T469			706.617	468.925	152	1.36	135084	79979.4	55456.6	87553.6	38948.7	79404.5	36664.5	52471.9	124171	7298.39	68243.7	68718.6	64180.7	41858.8	64861.2	45077.2	141617	84571.5	131445	93514.5	41832.4	129149	212116	158044	440435	205121	228973	123050	190010	234230	129835	211653	311424	215430	66248.1	123198	78889.8	79767.1	56227.8	68257.2	81267.9	25309.6
M340T447			340.321	447.019	153	1.34	2213	9841.82	5720.89	78900.7	130813	45497.8	57274.5	7457.14	2347.5	5801.81	3597.13	7430.86	5326.89	2294.51	8443.22	6223.78	7800.91	30396.3	2727.56	11118.4	11001.9	1328.54	2291.79	3438.68	5810.64	6363.96	3846.72	2186.26	5754.47	9859.97	33840.9	9650.35	3503.84	12521.9	12216.3	5746.91	13977.9	11860.6	1298.01	834.025	6743.49	6001.87
M365T338			365.23	338.007	154	1.33	19217.8	3502.59	11664.6	6740.7	6564.49	9538.03	6150.47	13673.8	17741.9	20828.7	6350.45	9180.78	13555.1	5947.49	10289.8	12407.1	16019.7	10895.9	21113.9	14145.3	4486.63	106077	60550.1	150733	102288	25990.7	89127.7	47588.3	35218.3	49347	39575.3	36734.4	32196.3	38614.3	6564.55	55450.7	50999.2	48458.9	36258.8	37512.9	45736.1	8469.46
M398T62			398.169	61.996	155	1.32	92511.7	444.066	10672.5	13174.5	7574.97	24875.5	38110	4224.24	2929.17	2690.85	2183.92	4651.14	3335.86	1052.09	11085.4	5348.06	3582.78	13747.2	1103.65	6973.41	5276.95	103092	39704.8	79561.9	43569.3	59117.9	65009.1	26442.2	20028.8	11818.7	21000.6	22277.6	3569.38	15739	7942.12	8716.55	12421.4	7305.21	7248.15	3991.11	7936.49	3048.01
M343T67			343.13	67.365	156	1.32	106241	23213.4	19228.9	24922.5	32052.6	41131.7	36692	14156.1	15615.2	18238.4	13639.2	15387.4	15407.3	1785.37	23781	19592.9	28161.9	32961.9	18682.8	24636.1	5986.6	154410	88500	115452	263357	111963	146737	69351.7	209600	217157	194106	169704	106431	179400	44644	69445.6	83405.7	70701.7	91539	62562.2	75530.8	11692
M255T400			255.212	399.844	157	1.31	6740.14	9976.53	370.753	448.205	704.044	3647.94	4451.34	13378.7	15277.2	24249.4	9765.91	29840	18502.2	8284.76	5885.05	8141.65	12924.9	13138.7	14296.4	10877.4	3653.88	82101.3	58771.1	60140	248.688	54867.2	51225.6	30420.4	103747	117134	97676.7	96878.5	79004.8	98888.3	13760.4	42345.4	8020.19	35602.6	6297.72	46815.5	27816.3	19284.9
M191T372_1			190.61	372.108	158	1.31	16336.4	11816.4	10599.9	11099	459.701	10062.3	5831.27	13464.5	22659	10832.2	17236.5	19243.2	16687.1	4668.11	22385.9	11133.5	29836.6	28066.6	25827.4	23450	7426	33827.6	36249.1	35862.3	35412	45379.8	37346.2	4584.39	61694.8	47023.3	52832.6	58242.2	58358.8	55630.4	5765.25	151360	129488	134924	116432	117092	129859	14416.7
M213T63			213.103	63.227	159	1.3	91100.9	11372	7181.22	7165.1	12397.7	25843.4	36557.8	94731.8	31241.9	17723.6	11819.5	17873.8	34678.1	34317	103905	151719	31306.5	34979.2	15955	67573	57971.2	12156.7	7084.48	8205.43	25056.7	12010.4	12902.7	7158.7	23416.4	18044.2	23475.4	20420.6	13299.7	19731.3	4251.04	11363	13386.7	10774.4	12857.1	11400.3	11956.3	1108.54
M139T43			139.051	42.855	160	1.3	3147.94	17521.7	35137.1	24864.2	31545.3	22443.3	12711.9	3438.45	2762.6	5043.17	758.959	3291.52	3058.94	1542.16	2968.67	3107.41	4540.13	4012.68	6701.32	4266.04	1507.94	70818.9	44789.5	47601.6	21996.7	32943.5	43630	18293.1	6810.48	5871.13	5958.85	7771.66	4845.19	6251.46	1099.02	1095.88	4283.39	4708.59	3578.7	5893.98	3912.11	1784.82
M205T398_1			204.625	398.3	161	1.29	236150	165712	152440	160672	121425	167280	42166.7	220035	352413	159545	278653	271347	256399	71833.9	100367	195276	330266	335684	135313	219381	109127	89287	62595.9	99011.4	46630.5	76517.6	74808.5	20865.5	54924.1	76957.3	50657.5	48863.1	66379.8	59556.3	11878	73632.2	235584	74848.9	199935	256033	168006	87919.8
M505T76			505.201	75.989	162	1.29	2829.02	1364.66	884.126	1355.78	1386.51	1564.02	737.751	2483.41	1921.75	6426.61	3322.26	4203.22	3671.45	1765.54	5086.83	3764.5	7051.8	6504.8	4098.2	5301.23	1446.36	3403.9	2864.49	2187.13	5092.8	14313.5	5572.37	5003.32	58016.9	53742.9	60425.7	68013.7	37649.7	55569.8	11279.3	23533.3	23523.4	20262.7	25296.1	23014.2	23125.9	1819.62
M450T373			450.275	372.863	163	1.29	1128.5	32639.8	41915.4	15028.8	63035.2	30749.6	23953.9	489.889	2240.88	599.294	24003.1	942.318	5655.1	10280.5	1542.87	698.481	794.376	942.304	3444.54	1484.51	1143.81	947.463	365.385	3616.47	1869.59	6814.4	2722.66	2596.97	1461.55	1565.04	1616.5	1557.22	445.597	1329.18	497.098	6992.73	6590.37	6317.16	6935.3	7916.04	6950.32	605.205
M547T529_2			547.472	529.422	164	1.27	32669.8	32176	20241.5	19567.8	22023.8	25335.8	6533.9	33652.9	117826	26071.4	74429.9	32160.4	56828	39121.8	50924.5	35407.1	51995.8	38594.8	51151	45614.6	7953.57	73105.1	94907.9	49437.2	82229	113530	82641.9	23969.9	95563.1	68703.4	77588	112821	166003	104136	38525	74808.2	14862.3	63392.6	14805.2	9496.33	35472.9	31038.3
M250T253			250.113	253.254	165	1.26	45403.6	84348.5	101806	102837	99228.8	86724.9	24271.9	64858.3	66166.4	68387.4	69339.5	70478.2	67846	2302.16	69327.9	49830	74959.9	87111.8	38012.9	63848.5	19740	8979.71	7205.68	7322.81	23851	16428.9	12757.6	7265.95	32034.4	29802.1	32458.9	29972.6	22328.3	29319.3	4085.43	12782.9	13017.3	10849.4	11070.1	11057.7	11755.5	1051.83
M333T261			333.142	261.277	166	1.26	981.501	1005.32	1285.67	1495.47	909.524	1135.5	246.908	820.017	1051.27	1670.69	1127.78	1993.32	1332.62	483.4	2427.28	9089.22	10879.7	7326.45	1383.66	6221.26	4151.63	56847.6	25565.6	26715.1	66961.1	30134	41244.7	19269	14844.5	14926	12113.8	14544.1	6150.63	12515.8	3742.42	4166.91	3074.28	2198.3	3149.07	4517.16	3421.14	928.316
M383T455			383.306	455.18	167	1.26	1186.18	1265.06	1416.52	2278.4	1177.77	1464.79	464.81	1236.9	1333.35	1860.33	1342.11	1921.99	1538.94	324.909	2074.58	2363.52	21503.3	3081.66	17407.7	9286.16	9402.72	1741	1333.24	2565.71	2745.01	2831.28	2243.25	667.439	3870.19	167351	10348.5	12560.8	179097	74645.3	90141.6	4825.97	724.946	1570.29	1351.51	635.599	1821.66	1726.24
M327T378_2			327.251	377.954	168	1.26	5599.36	4520.08	9791.57	10988.3	9252.67	8030.4	2809.68	11638.9	30082.4	24032.5	11253.4	18235.7	19048.6	8107.32	5946.44	10154.1	10310.7	12695.8	6364.89	9094.39	2869.33	47619.6	131402	155775	72764	47051.9	90922.4	49934.6	25743.2	24826.8	33159.5	89162.4	113606	57299.6	41287.6	174930	35280.7	185275	13817.4	52125.3	92285.8	81389.3
M547T420			547.404	419.973	169	1.25	88246.9	70784.4	79986.3	66792.1	87352	78632.4	9644.77	77252.4	29624	44206	56916.2	42126.3	50025	18036.6	109439	98427.9	53545	71896.4	24977.8	71657.2	34099.8	48099	19616.5	31581.9	16765.5	24408.3	28094.2	12511.5	27751.8	38655.7	40886.5	21937.3	25527	30951.7	8351.31	36444	33164	36220.2	58796.5	1149.79	33154.9	20627.9
M367T352_1			367.245	351.915	170	1.25	17850.8	11156.3	23712.9	8663.08	4588.61	13194.3	7600.44	6140.25	14073.8	23276	14090.4	11987.3	13913.5	6161.3	10262.7	9944.96	18251.4	9507.83	17585.1	13110.4	4403.42	24098.4	43079.1	90463.3	236943	44176.5	87752	86907.3	72953	146417	64766	85036.3	210013	115837	61644.6	53122.1	36763.2	52342.1	23464.9	33551.6	39848.8	12746.3
M170T92			170.021	92.187	171	1.25	1.44026e+06	28964.5	74445.7	72105.9	76742.1	338503	616215	149770	132250	82013.8	59821.3	104187	105608	36452.7	286649	128458	88683.6	147026	42692.9	138702	91899.7	106670	80490.7	97656.6	181619	122204	117728	38774.4	101674	61301	86038.5	89224.8	16601.6	70967.9	33735.8	31113.3	49946.5	27968.4	33715.4	23479.7	33244.7	10086
M351T422			351.251	421.607	172	1.25	73416.6	94689.1	37431.5	24216.9	25146.8	50980.2	31547.9	25233.5	122106	33218.1	91507.5	49353.7	64283.8	41223.4	48459.3	78809.8	78824.9	133477	168872	101689	48486.1	126595	102488	143740	59615.4	86012.7	103690	33110.4	159045	149487	201227	102161	102065	142797	41932.1	235958	42978.2	249064	66485.4	262252	171347	107183
M231T199_1			230.551	198.988	173	1.25	4224.88	465.701	2298.42	2333.19	2372.91	2339.02	1329.34	16607.4	15051	23817.5	13862.8	15994.6	17066.7	3913.51	31163.5	21824.6	22565	40231.5	9944.33	25145.8	11319.9	515.187	672.066	802.093	498.172	8531.28	2203.76	3539.37	36889.4	25725.1	32369.7	32520.6	9479.48	27396.9	10781	8300.63	10023.8	6904.27	12353.2	8636.9	9243.75	2062.03
M303T83			303.096	82.809	174	1.25	42512.7	11397.6	24008.2	23069.1	25681.6	25333.8	11139.3	32604.3	30354.5	42430.5	26872.9	41976.9	34847.8	7020.38	31846.5	39112.5	29653.2	28048.1	25783.1	30888.7	5104.17	37483.6	25638.6	36616.2	65772.2	46737.4	42449.6	15030.2	17973.6	15903.8	15212.4	13987.9	6507.67	13917.1	4387.06	2518.85	5425.17	5495.41	1803.3	1234.31	3295.41	2028.14
M598T397			597.51	397.491	175	1.25	17685.7	25871.1	22720.8	27012.8	23606.8	23379.4	3616.42	9385.62	20230.9	16656.3	18409	9483.41	14833.1	5087.78	12095.5	6308.13	22874.4	8641.61	61362	22256.3	22762.8	75432.9	116836	78085.4	255354	287843	162710	101395	177393	97535.8	122957	235153	200329	166674	56187.4	42790.2	255594	21130.2	54417.9	152056	105198	97922.6
M621T395			620.979	395.098	176	1.24	414.012	949.943	2380.52	2307.95	388.155	1288.12	990.172	498.412	1651.62	425.222	1614.25	1489.44	1135.79	618.715	870.082	278.952	1963.97	1130.83	1037.52	1056.27	605.955	14628	6173.36	7709.51	8921.43	2838.57	8054.17	4325.11	7242.42	10210.5	6970.34	5462.67	6632.62	7303.71	1760.98	1424.76	423.052	402.279	1283.84	299.739	766.735	540.701
M371T378			371.277	378.247	177	1.24	4690.79	6953.71	8499.51	9152.54	13046.1	8468.53	3081.76	6434.24	6930	10470.8	8294.66	14666.9	9359.3	3353.97	6582.87	5006.89	7924.83	11137.5	5115.14	7153.45	2527.64	31907.8	56613.2	110581	87129.8	41504.4	65547.3	32723.8	11423.8	11910.2	12144.8	29875.6	51890.3	23448.9	17718.2	59904.6	25112.4	108224	20144.4	24622	47601.4	37463.7
M393T466			393.298	465.705	178	1.23	6882.07	6570.02	9305.88	5493.1	7137.44	7077.7	1394.21	7110.83	7028.92	25011.5	5984.3	4933.74	10013.9	8430.77	4673.56	5372.37	3836.96	5124.18	2885.61	4378.54	1018.93	23690.4	11374.5	38119.7	8995.6	5584.23	17552.9	13372.7	2856.84	4633.13	5800.57	4828.45	7813.47	5186.49	1812.44	3147.34	173296	7456.99	244365	143881	114429	106116
M622T423			621.52	422.717	179	1.23	110481	113495	96199.2	98392.9	136445	111003	16062.1	106141	105207	170186	73581.4	123173	115658	35355.5	53159.8	136589	115332	94096.6	146630	109161	37273.9	163365	168283	177991	270276	325064	220996	72815	240755	206572	265895	301293	227207	248344	36609.1	160600	90108	112557	74270.9	62383.5	99983.8	38745.5
M160T48			160.076	47.667	180	1.23	168898	71419.9	74956.9	59900.6	62840.8	87603.3	45856.6	105288	83640.2	80064	86971.6	81339.4	87460.6	10305.6	142669	108293	106922	114703	88152.2	112148	19723.2	184941	151997	187966	81829.5	46585.4	130664	63518.8	116353	101257	130693	101985	110217	112101	12116.2	39333.1	46767.8	39723.7	46830.2	36603.1	41851.6	4673.66
M346T477			346.308	476.893	181	1.23	3699.44	1656.18	21242	33092	15109.3	14959.8	12961.9	10446.7	11233.4	2020.4	6284.5	17466.1	9490.22	5780.21	28179.8	6553.21	9332.07	145829	919.392	38162.7	61051.6	722.907	625.096	571.933	850.156	938.422	741.703	152.67	831.706	731.928	741.551	805.852	701.365	762.48	54.2673	912.841	760.332	829.187	622.43	640.836	753.125	123.528
M317T175			317.12	174.916	182	1.23	18829.8	7517.99	6066.01	6614.17	11704.1	10146.4	5335.31	25379.2	24454.4	30851.2	18282.3	32237.9	26241	5578.83	22987.7	27155.4	27049.5	18909.4	15501.9	22320.8	5106.7	14468.7	7110.3	11518	28240.3	17622	15791.8	7963.99	58221.9	48456.7	46032.1	61451.8	26053.4	48043.2	13884.9	83347.3	84118.6	75603.3	74158	84507.7	80346.9	5033.5
M352T309_1			351.716	309.452	183	1.21	14695.1	19012.1	30243.1	30402.3	22980.3	23466.6	6910.9	2021.26	1989.55	2363.54	2326.63	2415.84	2223.36	201.787	2434.18	1480.77	3312.45	15015.8	2052.77	4859.2	5716.65	63059.5	60239.1	57500.8	69286.3	76157	65248.5	7503.55	95351.5	78939.2	79012.5	76868.4	65547.7	79143.9	10639.3	31425	28327.3	21312.8	25762.8	23558.2	26077.2	3962.51
M160T45_2			160.108	45.3885	184	1.21	162641	43140.1	50066.6	50477.1	1075.93	61480.1	60145.4	1202.29	82667.4	2014.34	1427.1	71624.2	31787.1	41591.4	2384.58	93146.3	1400.6	3086.96	78557.9	35715.3	46062.1	1265.51	99090	737.211	1513.2	2949.03	21111	43599.3	6951.19	6932.95	6957.6	7231.85	4222.23	6459.16	1256.58	6745.22	7564.18	7696.33	8452.11	9162.59	7924.08	919.762
M324T240			324.096	239.621	185	1.21	1121.97	986.652	8311.76	7062.14	3109	4118.31	3393.2	4591.63	2930.12	4966.76	2665.71	5539	4138.64	1272.99	11285.6	10102.5	9382.46	15804.7	1866.44	9688.34	5035.08	1312.54	1404.93	1645.95	1550.77	2523.55	1687.55	484.728	46498.1	34993.7	44355	46413.1	24748.2	39401.6	9463.22	14230	16084.3	9947.65	14459.3	12108	13365.9	2376.91
M634T532			633.556	531.82	186	1.21	35467.8	474.216	17307.7	14746.3	18469.9	17293.2	12460.6	20543.8	49552.4	27906	38019.2	16726.2	30549.5	13370.6	25894.3	31911.7	59437.9	14036.4	40770	34410.1	17034.4	68476.5	56744.9	55603.1	121777	44302.5	69380.8	30514.6	70333.9	72420.5	58734.4	67686.7	118017	77438.6	23276.8	19550.7	13143.6	12143.2	8920.83	6835.41	12118.7	4858.63
M238T110			238.108	109.762	187	1.2	2502.65	1806.28	1532.38	1919.1	2005.14	1953.11	355.117	28416.9	20881.6	23034.8	12302.9	28672	22661.6	6705.57	57969.5	46512.8	33542.5	554.208	15550.5	30825.9	23129.8	2602.33	2756.51	325.937	2622.7	4452.5	2552	1467.7	83669	1027.09	73598.2	60987.2	2505.81	44357.5	39705.3	3406.62	35795.6	4262.49	3566.03	4358.74	10277.9	14270.9
M198T386			197.617	386.495	188	1.2	3470.57	4679.19	5840.51	5862.39	3415.86	4653.7	1204.38	6380.05	19499.3	4910.98	11204	13750.5	11149	5876.97	11128.1	5791.15	18970.1	12084.1	18750.8	13344.9	5577.4	9518.25	13387.5	13731.7	14592.8	18638.3	13973.7	3255.57	22268.5	16891	21191.1	18728.3	24301.2	20676	2918.18	85781	82833.1	90485.3	73492.3	81337.4	82785.8	6259.42
M287T345			287.16	345.067	189	1.2	20210.4	26287	31888.4	23776.5	22204.9	24873.4	4507.64	2296.95	1822.32	3677.05	3680.58	4709.66	3237.32	1166.63	3835.8	4556.74	2704.78	16437	2117.44	5930.35	5949.91	25916.5	34565.5	29407.3	27922.2	25563	28674.9	3643.28	37617.3	38482.8	32886.1	35881.5	47173.4	38408.2	5346.44	12418.4	11829.2	8868.33	6759.22	7305.21	9436.08	2581.18
M329T421			329.269	421.421	190	1.2	22334.6	21828.9	15821	22243.6	27404.4	21926.5	4109.78	19496.5	39948.3	35539.7	19946	37666.4	30519.4	9981.09	32894.1	27254.7	44548.2	40289.6	46331.9	38263.7	8042.48	99951.7	111769	100193	179525	69746.6	112237	40710.4	122350	102345	132499	236054	81288.4	134907	59852.9	261117	71391.8	467981	43239.4	76843	184114	180672
M528T367			528.286	367.336	191	1.2	12187.9	15690.9	16917.5	19075.9	14900.9	15754.6	2541.54	10042.2	18516.8	8567.05	15154.6	13719.2	13200	3993.55	11647.8	7205.11	18399.4	9507.35	18404	13032.7	5146.82	136590	93599.3	102269	63208.2	54973.4	90128	32706	93985.4	117245	107803	82404	68779.7	94043.4	19373.7	30541.8	21479.8	17877.1	37068.1	15759.2	24545.2	8997.7
M769T501			768.562	500.899	192	1.2	5762.02	14373.2	6504.59	6601.48	4862.19	7620.7	3838.78	4520.93	14515.3	3492.89	6869.05	3881.34	6655.91	4584.68	5041.45	3205.93	11502.4	2050.69	16904.1	7740.91	6291.76	37134.7	90200.3	35322.2	78802.4	75199.7	63331.9	25362	73158.5	48746.3	61192.2	88849.1	122595	78908.1	28565.6	6970.43	3652.03	3888.9	1624.94	1256.78	3478.62	2278.37
M386T277			386.309	276.77	193	1.19	8130.55	5689.46	6761.92	10946.7	8331.89	7972.11	1979.77	5846.64	7858.18	8599.11	7382.38	8185.74	7574.41	1063.76	7416.71	5443.11	11363.5	8627.42	19277.7	10425.7	5393.33	77520.5	53385.8	71614.1	75740.8	103224	76297.1	17844.7	70345.5	68001.5	85898.4	89605.9	31214.1	69013.1	23134.1	19170.4	11645	8340.09	22369.4	11969.1	14698.8	5831.9
M598T422			597.52	421.588	194	1.19	179713	236487	185537	174584	226977	200660	28825.3	194426	147842	357238	160479	214055	214808	83872.4	114433	192240	217052	133742	215153	174524	47558.6	243184	210061	260685	224201	325845	252795	45096.4	305769	300869	421041	373987	236605	327654	71334	301344	403553	301899	244112	327310	315644	57823.7
M268T44			268.105	44.4	195	1.19	115599	106080	103727	122873	130570	115770	11274.3	78651.8	71070.4	100346	85679.6	92360.5	85621.6	11429.4	99308.3	78084.9	94495.7	106133	113916	98387.7	13503.1	221449	148532	202076	235720	274664	216488	46380.6	270128	252023	261226	232312	206303	244399	25498.3	210606	200113	203026	210561	205007	205862	4648.1
M653T416			652.56	415.808	196	1.19	151346	115967	106697	126942	89929.7	118177	22976.1	74278.5	130569	48840.8	113822	96998	92901.5	32254.5	136879	75689.3	133496	97747.4	151155	118993	31189.8	200641	260060	207814	288229	249415	241232	36723.8	271329	236764	259073	268536	280536	263248	16665.7	221542	227259	145223	173235	162231	185898	36593.1
M324T345			324.327	344.919	197	1.18	5450.33	18611.7	12723.7	95130.7	34208	33224.9	36189	8390.22	2107.67	2141.69	2887.02	5311.1	4167.54	2698.41	7057.12	4250.3	7062.14	18863.6	4706.14	8387.85	5998.81	3025.79	1668.8	2285.42	22367.5	17212	9311.91	9748.9	5412.59	7706.76	27569.4	8602.87	4459.67	10750.2	9550.11	6510.02	8240.95	11283.3	4382.3	2076.84	6498.69	3534.13
M259T107			259.07	106.794	198	1.18	17762.7	8371.01	12183.3	10006.3	11743.9	12013.4	3551.46	21002.1	20182.9	49023.7	40035.9	31192.7	32287.5	12401.8	30701.6	21796.4	33046.2	36012.4	27992.1	29909.7	5413.21	5359.03	5049.5	6224.59	8282.12	13412.9	7665.63	3451.54	21512.4	46810.5	24645.6	26144.4	28479.9	29518.6	9991.48	11658.4	13774	11375.9	12737.4	13150.2	12539.2	1008.26
M415T316			415.353	316.04	199	1.18	14937.7	21326	29236.6	30073.7	23688.9	23852.6	6196.27	20872.3	23081.2	20693.1	21129.3	19677.5	21090.7	1241.62	21483.8	13893.7	19866.6	17625.2	32924.5	21158.8	7167.22	126965	77449.6	80137.3	126100	56533.1	93437	31564.9	83403.6	96159.2	80167.2	105629	52932.9	83658.4	19970.5	27278	15726.4	9699.18	24571.1	16230.5	18701	7141.57
M343T414			343.285	414.319	200	1.18	7350.52	12416.3	9987.99	15044.9	5879.42	10135.8	3714.71	21629.9	56414.4	25355.9	32404.5	51945.6	37550	15745.8	27530.2	15745.7	48205.4	40002.9	49758.5	36248.5	14456.4	12674.6	17835.5	21617.6	20734.1	22564.6	19085.3	3996.74	21639.3	29760.8	43500	15446.9	29890	28047.4	10546.9	179062	35215.5	485223	9600.2	4345.16	142689	204362
M728T569			727.566	568.519	201	1.18	8655.42	26149.8	2901.71	973.44	9721.55	9680.38	9925.41	27420.9	37651.2	23146.6	28636.1	16059.8	26582.9	7905.19	18040.1	23236.3	33835.5	4249.87	47500.4	25372.4	16323	9498.63	15924.5	12630	13655.6	14036.1	13149	2363.34	45711.7	33860.5	52479.1	68188	60289.5	52105.7	13224.3	57826.5	44791.4	39938.1	36011	35771.4	42867.7	9129.9
M211T139			211.094	138.741	202	1.18	931.712	5746.34	267400	209222	1949.32	97050	130596	1802.62	235970	184209	232829	180779	167118	96003.1	273574	11973.5	183554	238123	197331	180911	100842	6647.07	7014.21	10262.1	3836.25	708371	147226	313698	693893	4192.81	4097.32	2394.54	4363.77	141788	308637	4496.13	4145.02	680217	3364.74	5551.12	139555	302240
M303T123			303.134	123.179	203	1.18	13810	21194.6	29520.2	23932.7	16064.6	20904.4	6269.8	31605.6	21983.3	31130.3	32317.9	27627.4	28932.9	4284.62	20828.3	21049.3	19117.5	19239.6	11497.9	18346.5	3929.35	52234.3	27638.4	28171.9	72905.8	43739.3	44937.9	18823.2	60240.2	69477.1	73740.9	51555.8	52130	61428.8	10021.5	22032.5	22907.5	17613	21858.6	16052	20092.7	3052.88
M255T394_2			255.233	393.773	204	1.18	31093.9	73554.3	93878.7	77133.5	67758.2	68683.7	23150.4	44090.1	38283	42086.7	52162.7	41666	43657.7	5192.4	47229.6	34159.7	40643.9	34232.7	26500.9	36553.4	7792.34	133834	64207.4	70178.7	133023	51353	90519.2	39758	101466	131609	101423	94761.6	92552.5	104362	15740.4	26940.5	62192	61498.7	23782.4	31491.8	41181.1	19063.4
M694T393			693.577	392.799	205	1.18	4593.32	5228.57	4294.54	6434.59	3917.54	4893.71	985.977	1733.92	3107.29	2373.98	2102.6	1735.73	2210.7	569.022	1575.01	1344.64	2083.94	1552.26	8510.06	3013.18	3084.87	61463.9	25233.5	27657.9	71097.4	27867.2	42664	21850.9	9634.89	9663.35	7541.52	13385.5	11675.6	10380.2	2226.97	3091.19	8429.88	2156.06	3013.49	24079.7	8154.07	9243.06
M357T449			357.291	448.538	206	1.17	2620.42	3255.62	3870.72	3264.26	2691.56	3140.52	508.386	3452.74	3873.81	3186.96	2674.33	743.83	2786.34	1221.84	2281.58	6962.64	46291.7	3636.19	7727.68	13380	18536.7	5619.13	3600.28	5674.09	5238.34	3607.62	4747.89	1057.67	4117.31	201540	14914.8	10520	113967	69012	86810	4076.18	1374.76	2564.39	2838.3	1295.8	2429.89	1150.5
M664T508			664.491	507.651	207	1.17	2608.88	1686.75	2276.91	1979.55	1604.08	2031.23	417.679	1902.01	2100.98	2306.98	1897.46	2486.47	2138.78	257.345	2040.69	1613.43	1994.8	3085.45	10364.4	3819.76	3699.17	7693.76	7654.56	8572.27	4217.1	2764.06	6180.35	2535.27	3114.45	8801.12	8220.17	3724.68	5225.6	5817.2	2584.16	53957.4	69100.9	40297.3	72561.3	85333.7	64250.1	17441.3
M334T58			334.151	58.016	208	1.17	3039.36	794.181	1124.05	412.461	474.987	1169.01	1083.37	3244.31	2424.88	13436.9	3135.1	2810.67	5010.36	4721.35	8236.08	10704.3	7151.72	7870.5	3030.43	7398.6	2783.58	4086.91	2287.75	2795.7	5949.02	1987.97	3421.47	1625.05	23052.3	138298	23912.3	26120.1	71195.8	56515.8	50026.4	17377.9	15573	19216.5	18950.9	14539.5	17131.6	2053.38
M318T404			318.232	403.945	209	1.17	11772.9	30569.4	53369.7	32649.1	40764.4	33825.1	15235.1	23672.7	4781.25	15973	20859.6	9753.57	15008	7785.32	1055.51	23371.3	6186.05	8459.38	974.059	8009.26	9183.79	12030.9	1077.39	1657.34	4617.09	1277.83	4132.11	4642.98	1862.89	6106.33	3211.68	325.249	842.777	2469.79	2312.43	2523.96	5114.93	2979.63	7826.08	5524.24	4793.77	2137.45
M655T428			654.576	428.119	210	1.17	140967	175527	178041	175175	192604	172463	19010.1	130383	222238	111066	152797	156879	154673	42026.8	160345	104213	150205	91887.6	145340	130398	30336	255557	346838	262724	256246	284824	281238	38545.9	295089	231649	231503	253020	269495	256151	26980.9	258386	86160.8	136019	287728	61908.4	166040	101810
M263T116			263.103	116.064	211	1.16	66231	13559.9	32112.2	36228.4	35775.6	36781.4	18905.3	44660.4	48661.5	107161	60611.4	49143.5	62047.7	25910.1	53608.7	54019.8	44734.9	40966.4	33213.1	45308.6	8807.12	11797.9	22789.4	16731	21131	17354	17960.7	4278.65	10663.3	13991.2	10376.9	10385.4	6808.22	10445	2542.52	5931.88	5343.58	5121.45	6309.29	5834.37	5708.11	475.52
M132T43			132.066	43.372	212	1.16	7318.79	116322	125736	124524	105455	95871.3	50161.1	72753.3	87468.3	128186	128107	131539	109611	27462.5	54261	93887.5	99013.4	82886.8	198937	105797	54871.8	89743.7	84379.2	62678.5	49524.2	120261	81317.3	27180.8	136061	124742	114558	141025	153237	133925	14893.9	56131.6	61977.7	62825.8	71069.5	60696.8	62540.3	5422.53
M362T446			362.303	446.218	213	1.16	2696.89	7288.79	4799.44	43012.5	74648	26489.1	31612.7	6117.56	2661.12	1910.55	2328.38	5624.29	3728.38	1981.55	5769.17	4959.67	6512.98	20540.4	1244.05	7805.26	7401.81	1336.52	1956.84	2530.26	6618	6243.75	3737.08	2498.57	5866.82	10761.9	50216.7	10937.1	3294.19	16215.4	19285.6	8427.43	15468	13790.1	6961.49	849.034	9099.21	5823.49
M303T274			303.132	273.705	214	1.15	29612.4	1409.32	1167.18	1303.97	2756.89	7249.95	12517.3	11724.9	4655.92	5177.92	2301.92	4608.86	5693.9	3549.62	25132.4	31329.9	13881.3	28343.1	4088.01	20555	11329.2	46550.2	18342.3	28327.5	116891	51740.4	52370.2	38513.3	127283	84458.1	121323	129568	37318	99990.1	39509.2	45610.6	54894.1	38099	44865.8	37274.9	44148.9	7105.68
M234T51_2			234.132	51.002	215	1.15	8116.34	1355.11	5088.3	5144.59	3654.15	4671.7	2464.65	960.111	1505.3	1381.33	2241.32	2016.95	1621	512.145	2482.26	3956.55	1919.65	4676.11	6479.52	3902.82	1815.99	32889.5	23898.7	33833.7	21419.7	28761.4	28160.6	5443.15	4589.7	5018.12	4693.29	3454.34	1342.85	3819.66	1505.04	3285.18	2732.98	3091.62	3787.64	3614.2	3302.33	418.819
M347T413			347.261	413.047	216	1.15	3887.86	2672	2892.14	3539.6	5300.59	3658.44	1039.68	3689.31	5445.08	2258.92	2578.27	6088.09	4011.93	1702.71	4539.02	6589.01	5322.72	5432.63	5778.28	5532.33	744.58	4273.39	4681.12	4308.51	602.16	5770.37	3927.11	1954.92	3464.92	2990.82	4757.53	7445.64	5725.31	4876.84	1794.68	22292.5	165012	36410.2	27703.9	167611	83806	75490.8
M694T414			693.577	414.3	217	1.14	47601.6	63196.1	60766.8	63532.3	59861.2	58991.6	6556.22	39892.2	69362.1	39950	53420.3	44747.4	49474.4	12409.4	38605.5	40478.7	59693	41560.4	72265.4	50520.6	14832.9	125207	141104	121341	176522	144656	141766	21841	162488	158176	150800	167931	269392	181757	49388	197945	193118	127110	118274	114886	150267	41596.4
M722T421			721.507	420.69	218	1.14	5861.65	4355.73	4924.72	9306.82	14614.2	7812.62	4260	7903.36	8627.32	89964.4	7463.97	12088.4	25209.5	36244.8	5719.76	8530.63	6673.24	9298.55	3079.77	6660.39	2457.82	4488.63	3332.55	4941.98	3568.08	3141.69	3894.58	780.906	2765.92	3132.25	5594.93	8113.12	4299.51	4781.14	2166.58	2244.89	3424.87	6168.15	6050.12	3651.51	4307.91	1729.34
M258T312			258.28	312.05	219	1.14	9048.89	51988.5	42387.7	120025	3023.83	45294.7	46739.8	12705.7	8657.02	1934.21	4498.38	33053	12169.7	12372.9	9193.89	3066.36	13320.1	44017.3	3733.13	14666.2	16936.2	2550.43	1661.2	4737.64	15549.2	34098.3	11719.3	13688.2	16543.3	21250.8	56484.2	7019.79	5532.02	21366	20694.7	7740.38	22465.5	22808.3	6796.13	4356.77	12833.4	9034.88
M327T367			327.252	366.807	220	1.14	15942.8	27790.1	23620.6	20686	22361.7	22080.3	4320.48	7157.02	2478.08	5355.64	8682.61	13412.6	7417.18	4069.96	6800.67	7623.87	5163.14	13139.1	3795.95	7304.54	3580.98	19885.8	35262.9	25807.6	17476.8	64225.3	32531.7	18998.2	20092.4	18808.9	22537.2	22539.7	36076.5	24011	6934.17	21888.5	166544	36555	31498.2	210020	93301	88214.5
M492T350			492.332	349.884	221	1.14	12051.3	23097.7	25958.7	24340.7	12646.5	19619	6717.02	24091.8	20984.3	26296.1	22894.5	23302	23513.7	1930.15	25036.6	27543.3	31706.2	29626	25208.3	27824.1	2872.65	56699.6	50294.8	41946.4	182824	75332.1	81419.4	58004.1	126839	108966	121094	118371	170381	129130	23947	46396	44964.7	42846.4	47821	45033.1	45412.2	1850.49
M127T61			127.039	60.737	222	1.13	1302.76	25817.8	1254.94	18459.7	4672.33	10301.5	11200.6	26885.9	1230.99	6689.55	1856.57	17752.2	10883.1	11129.9	1596.89	20614.9	3765.82	2150.82	6545.66	6934.83	7885.42	19716.5	8104.5	8016.94	41929.5	114339	38421.3	44635.2	9773.27	10337.9	8284.26	15550.5	25432.8	13875.7	7017.52	40381.4	52333.6	66010.2	60268.8	148171	73432.9	42871
M303T389_2			303.254	388.76	223	1.13	2615.43	4025.72	4328.13	4814.19	1295.27	3415.75	1440.23	3139.11	7693.08	3269.49	4434.33	5123.8	4731.96	1849.75	4775.44	2776.54	8749.99	7017.67	10456.7	6755.28	3061.81	29284.3	29950.8	31137.5	50292.9	41582.5	36449.6	9216.52	66544.4	41270.2	59645.4	75941.3	59774.7	60635.2	12707.5	114564	91737.7	94761.6	54114	66315.6	84298.6	24058.8
M337T387			337.235	387.391	224	1.13	6540.56	5606.41	3795.09	6905.81	2974.55	5164.48	1716.99	6876.27	17662.9	7187.13	10122.4	11873.8	10744.5	4391.59	9312.49	5355.87	17742.8	11409.2	28499.3	14463.9	9035.61	19869.6	23188.9	22211.4	29985.4	44709.5	27992.9	10073.6	58423.1	36262.6	50650.9	55709.5	66858.6	53581	11322.4	302488	9814.74	272316	18183	4321.7	121425	151971
M567T504			567.489	503.805	225	1.13	3419.71	5216.59	4545.02	4628.58	3119.26	4185.83	882.045	3096.37	4232.82	1448.2	4274.92	3803.78	3371.22	1174.7	2933.86	2138.46	4548.16	2661.82	4748.37	3406.13	1171.52	5609.49	10644.9	8835.36	11298.4	7876.48	8852.92	2272.94	9401.92	8425.75	7952.5	8690.28	11094.7	9113.03	1225.6	4692.7	2894.18	3750.34	11619.2	3117.14	5214.71	3647.57
M329T369			329.269	369.461	226	1.13	17939.5	9590.43	18576.9	19898.6	21773.6	17555.8	4688.17	14265.3	18383.6	17115.8	15444.3	14094.4	15860.7	1856.01	12596.8	12236.3	20251.4	10355.4	24792.1	16046.4	6184.1	72796.3	89325.4	130002	43350.9	56531.1	78401.2	33616.4	62192.7	87563.5	52017.1	59406.4	45648.5	61365.7	16009.9	19582.7	21643.8	10752.7	15655.9	31374.9	19802	7688.53
M333T405			333.238	404.864	227	1.13	73585.8	112399	104702	100930	71869.4	92697.1	18702.2	78952.7	61682.1	51450.2	90716	74592.4	71478.7	15270.4	103105	82196.6	68615.8	84104.5	30111.9	73626.7	27252.6	66571.7	24099.2	36470.7	32146.5	8294.03	33516.4	21378.2	31441.6	51532.9	40734.5	15672.9	17049.7	31286.3	15375.9	5927.11	2835.93	5564.89	5441.45	2615.69	4477.02	1610.44
M326T390			326.239	390.174	229	1.13	3690.03	2137.17	2389.89	2131.82	2956.83	2661.15	666.021	1245.18	3954.92	1924.44	2642.36	3176.67	2588.71	1056.11	2205.86	1041.3	4993.77	2964.75	5973.33	3435.8	2020.8	8896.47	12657.6	11992.2	11227.5	15689.9	12092.7	2461.37	20681.1	15991.9	16158.5	20588	25931.4	19870.2	4084.4	71981.4	1479.06	65967.9	3717.65	1616.22	28952.4	36607.7
M340T311			340.143	310.896	230	1.12	17763.3	20170.9	24329.2	23716.3	17659.3	20727.8	3178.65	2347.02	2283.5	2051.92	1902.03	2565.24	2229.94	258.949	1888.21	1567.73	2294.81	14681.7	1723.57	4431.2	5736.6	19081.8	16795.7	20780.6	15166.4	16968.6	17758.6	2188.27	17605.6	18729.2	14911.1	15301.8	18297.5	16969	1752.36	4541.8	4163.92	2887.89	3483.13	2914.79	3598.3	740.819
M353T433			353.269	432.869	231	1.12	27611.3	19250	17509.8	15770.2	22534.8	20535.2	4679.19	12083.1	4680.16	14075.2	10689.3	6958.37	9697.22	3824.77	40573.6	23750.9	15182.5	63731.9	6928.5	30033.5	22586.2	42289.8	7662.23	11119.3	4729.7	41732	21506.6	18854.9	3797.65	10113.3	20243.4	29344.4	64938.5	25687.4	24007.1	44305	8361.6	45235.8	6351.71	19943.7	24839.6	18922.2
M180T279			180.136	279.251	232	1.12	2754.2	3283.05	3842.91	7501.15	16639	6804.06	5804.73	49099.4	8182.71	2466.45	10410.7	61845.8	26401	27074	6075.51	6627.91	14917.9	27742.3	2965.59	11665.8	10016.9	8178.38	7978.83	8180.94	5106.3	9154.88	7719.87	1531.33	7517.16	8422.72	8781.14	9059.59	7771.55	8310.43	654.808	13037.6	11774.9	11694.1	10683.2	9616.32	11361.2	1284.19
M177T50			177.065	49.869	233	1.12	3184.4	4817.68	4686.34	4002.8	6252.59	4588.76	1134.22	5496.89	6086.77	10485	6154.3	5571.96	6758.98	2103.71	7024.12	12655.2	24259.7	3501.3	41054.1	17698.9	15243.6	3713.94	3207.28	4313.15	3737.29	3381.14	3670.56	423.571	3975.45	4354.92	4086.92	3704.31	4860.01	4196.32	438.311	3723.72	3797.7	3229.8	3900.39	3379.95	3606.31	287.182
M383T360			383.29	360.157	234	1.12	1459.64	1119.39	1283.35	1926.76	1569.68	1471.76	306.767	1382.82	1193.97	726.033	854.287	2484.59	1328.34	697.394	875.401	1119.58	1128.33	1277.29	667.704	1013.66	241.18	3259.39	897.983	3114.5	3487.73	998.727	2351.66	1288.42	1324.94	1910.73	1732.21	1464.93	1919.1	1670.38	266.925	53130	50198.5	39507.8	59107.1	50246.2	50437.9	7105.69
M205T407_1			204.625	407.099	235	1.12	87354.6	97229.2	71848.4	85273.4	19451.1	72231.4	30861	71922.1	172232	57766.3	91057.8	137526	106101	47674.8	47888.9	65311.1	150433	158220	191051	122581	62435.5	77878.8	128192	144698	10276.1	90154.1	90239.8	52328.5	161100	95012.1	160687	74569.7	104284	119131	39611.3	129726	14639.5	139359	22078	7160.17	62592.4	65980.2
M351T393_3			351.207	393.45	236	1.11	1875.53	36843.9	1797.87	2083.06	2550.88	9030.25	15551.1	3617.87	1609.9	1658.45	1540.15	1462.74	1977.82	919.781	1077.87	603.565	754.506	1740.41	417.162	918.701	519.217	3524.19	3870.47	4624.82	1989.43	2248.7	3251.52	1111.52	2459.61	2849.51	2640.89	1754.36	2155.7	2372.02	429.03	1139.54	90101.4	1667.32	1465.13	710092	160893	309404
M219T427			218.641	427.088	237	1.11	14763.5	22765.6	18344.2	20527.4	8817.63	17043.7	5464.32	27011.2	45233.5	23346.5	32712	33264.5	32313.5	8314.29	41744.5	26638.7	46864.6	67060	55092.2	47480	15074.4	17352.6	16328.7	27652.7	7251.29	8832.02	15483.5	8128.8	34347.2	28936.1	43631.2	14901.4	12773.2	26917.8	13067.8	64497.1	7926.63	72131.2	9495.44	3569.73	31524	33762.8
M399T402_1			399.217	401.842	238	1.11	3496.91	3295.45	2103.97	2975.96	1878.45	2750.15	721.702	3926.97	3682.97	2334.44	3333.03	4144.27	3484.33	709.937	584.36	3132.9	3141.48	1876.89	2726.86	2292.5	1084.69	51312.9	34989.7	73527.2	887.583	951.729	32333.8	31772.1	810.437	968.718	840.288	646.558	631.454	779.491	141.463	828.547	1371.22	1102.21	1698.54	1252.85	1250.67	322.237
M455T305			455.359	304.891	239	1.11	550.996	883.143	1544.3	1757.59	1228	1192.81	487.745	1168.84	679.267	1662.3	1251.66	863.142	1125.04	378.781	1723.23	953.093	1523.57	1941.37	1718.23	1571.9	376.192	81971.1	40490	43103.2	64593.8	49560.5	55943.7	17296.6	65359.7	79779	58692.5	65059.8	30079.1	59794	18318.6	13722.2	8575.46	5514.16	16696.4	8180.38	10537.7	4547.35
M629T444			628.56	444.104	240	1.11	8402.45	22138.2	9408.37	20337.7	21343.1	16326	6813.28	17715.5	10820.5	10247.7	17181.9	22003	15593.7	4986.66	6338.48	12548.3	27435.3	11853.4	29941.1	17623.3	10421.1	20091.3	64708	67449.8	40857.2	18677	42356.7	23387.9	64980.1	67737.7	33833.6	66022.6	15863.5	49687.5	23568.6	87982.8	139603	72532.7	50788.4	92935.5	88768.4	32818.4
M366T370			366.204	369.928	241	1.11	4769.73	3832.67	4348.58	4647.35	4480.58	4415.78	363.193	1390.84	1839.58	1380.51	2547.61	808.354	1593.38	646.872	1100.57	1030.36	1303.32	2203.6	1485.94	1424.76	470.565	10201.6	26394.9	6196.45	79544.8	19965.5	28460.7	29644.2	61243.5	107839	59621.1	67400.2	31860.1	65592.7	27296.8	8961.96	7169.72	4979.22	9584.86	2667.62	6672.68	2866.92
M276T396			276.262	395.669	242	1.1	2992.42	5388.76	4692.54	11039.5	6425.2	6107.68	3026.87	7807.46	4292.81	6590.64	6470.53	13960	7824.29	3656.29	4375.23	4576.41	6263.18	10665.1	2777.27	5731.45	3021.78	30081.3	63680	38176.3	54648.8	17129.4	40743.2	18690.5	10577.9	10376.6	26479.6	30724.4	63733.5	28378.4	21794.6	53430.2	103154	94925.3	36921.1	90747.5	75835.6	28937
M119T162			119.061	161.803	243	1.1	10602.6	7279.19	7378.93	13140.3	5956.23	8871.45	2936.05	19586.2	12695.4	17769.5	16395.4	10479.9	15385.3	3729.97	30729	30091.3	22063.3	32282.4	11351	25303.4	8749.8	11901.5	27850.1	20862.9	31301.7	23582.3	23099.7	7424.22	60430.1	67089.3	58886.4	57849.6	66208.1	62092.7	4270.57	38402.5	31876.6	32140	42650.7	36188.6	36251.7	4517.29
M330T209			330.109	208.553	244	1.1	1569.48	1084.07	1238.29	1319.36	1522.09	1346.66	201.164	7211.55	6129.51	7324.76	5179.59	9922.85	7153.65	1778.12	17492.3	15881.7	15011.2	24494.2	8083.51	16192.6	5870.59	1977.3	1636.36	2407.98	2561.39	2439.23	2204.45	386.742	11387.4	22993.6	9751	9858.1	7787.93	12355.6	6082.54	2768.64	4227.73	2548.93	4926.17	3571.81	3608.66	993.619
M514T361			514.307	361.113	245	1.1	37486.1	33671.8	72616.6	65081.4	42394.3	50250	17462.1	24955.9	12805.9	35837.2	23960.1	23692.8	24250.4	8156.62	64423	16234.7	24373.8	22907.5	12667.6	28121.3	20851.6	93418.5	37163.8	26963.1	41698.6	76575.3	55163.9	28383.4	38640.4	48967	45805.4	80134.7	78270.4	58363.6	19398.9	11297.3	5254.12	7166.69	8477.24	4584.99	7356.08	2689.03
M253T75			253.074	75.149	246	1.1	11625.8	2746.48	2453.16	2033.36	4231.29	4618.02	4004	14412.1	15466.5	16423.8	15152.3	18926.2	16076.2	1749.11	29386.7	15672.1	22075.3	23441.5	15108.2	21136.8	5925.81	5192.61	3435.14	4639.38	3221.64	4928.06	4283.37	896.638	23905	21818	24552.6	24861.2	16484.1	22324.2	3473.61	7074.99	7871.89	6234.34	8059.82	6178.16	7083.84	882.544
M329T360			329.269	360.113	247	1.1	45756.7	81739.3	71003.5	63683.6	77955.4	68027.7	14232.8	48629.5	21284	63369	40764.2	42870.2	43383.4	15186	66064.8	43553.7	50980.4	36332.2	21973	43780.8	16428.1	163963	63384	59735.8	39296.6	104785	86232.9	49531	40544.5	61920.9	191162	90056	152689	107274	63059.4	12994.2	12135	27273.7	68678.4	18375.2	27891.3	23583.4
M512T395			512.416	394.522	248	1.1	13340.1	12373.2	15068	22416.5	25785.5	17796.7	5955.79	19197	25011.4	8445.53	19031.7	32747.4	20886.6	8927.06	11898.8	26525	15646.1	22841.5	9035.16	17189.3	7347.84	8475.27	9918.94	17285.9	11270.1	21545.5	13699.1	5520.62	6665.96	7683.98	19085.8	6403.1	9502.66	9868.31	5294.59	20839.4	287847	31065.2	24628.4	196104	112097	122974
M178T326			178.099	325.598	249	1.09	29778.4	31462.2	35312.9	35698.2	29889.6	32428.2	2890.22	13723.6	15377.9	14629.9	16637	18867.9	15847.3	1997.49	16291.1	10113.3	19228.6	18766.3	15970	16073.9	3632.77	52295.3	45604.4	57410.5	54586.6	41740.6	50327.5	6485.05	70834.6	70823	66852.3	58777.3	63470.5	66151.5	5143.24	62833.7	64639.5	59966.2	56784.2	58046	60453.9	3266.68
M245T107_2			245.036	107.13	250	1.09	2425.79	17009.9	11474.3	14646.7	13652.5	11841.8	5626.97	5935.33	5058.65	7771.24	6881.58	5916.72	6312.7	1039.57	5750.21	8601.59	14511.5	7010.91	10323.2	9239.48	3410.17	1738.68	1568.43	1635.29	1677.15	3457.06	2015.32	808.339	23036.2	17729.1	19570.2	20720	18178.1	19846.7	2137.79	8223.03	8992.79	6481.39	10132.8	8378.33	8441.67	1328.37
M310T51_2			310.115	50.561	251	1.07	15928.1	48894.9	53413.5	53511.8	33181.5	40986	16299.5	43967.8	40821.1	50521.6	46415.5	47554.8	45856.1	3670.22	67514.3	44600.1	48577.2	44743.6	51231.7	51333.4	9462.98	60366.5	45641.7	58116.1	202348	64877.4	86269.9	65280.1	113241	99789	104893	105932	117641	108299	7094.49	28215.4	25928.1	26379.2	24806.3	24896.2	26045.1	1386.54
M223T249_2			223.087	249.049	252	1.07	1055.74	1308.75	1113.59	1338.84	709.089	1105.2	252.704	1115.28	1242.52	1310.16	404.759	1394.51	1093.45	398.308	1282.15	1375.98	376.369	1902.2	1219.15	1231.17	548.791	2214.25	1265.95	1287.77	1474.47	1086.58	1465.8	440.368	31123.2	21921.5	18020	42132.4	31203.6	28880.1	9386.4	6497.74	4660.17	4981.09	4585.27	4036.75	4952.2	928.373
M425T375_3			425.275	374.515	253	1.07	8494.62	19199.2	30770.8	24765.2	10940.7	18834.1	9314.07	10635.8	4298.85	8963.7	13531.7	8888.48	9263.71	3353.32	5061.45	5175.22	5745.11	5662.36	4290.35	5186.9	582.525	86736.3	742.192	45078.5	113560	10226.5	51268.6	48512.4	110189	121849	426.261	80279.4	88444	80237.6	47607.3	12886	12504.7	10233.7	12758.5	12058.7	12088.3	1083.9
M472T375			472.257	374.689	254	1.07	16121.9	17977	18494	20470.6	19301.6	18473	1616.4	11011.8	15383.1	8663.39	17902.1	8793.46	12350.8	4124.81	5227.42	612.44	6533.65	4990.39	5410.29	4554.84	2282.11	59693.4	26108.4	43022.6	9909.6	1103.75	27967.5	23897.7	26083.7	46030.8	48108.6	25499	37295.9	36603.6	10673.5	1576.2	10380.6	1175.72	1737.32	1469.5	3267.87	3981.43
M367T352_2			367.368	351.513	255	1.07	1709.66	1176.58	1352.1	15658	98776.9	23734.7	42401.4	6707.09	2110.5	2126.4	804.775	7046.26	3759.01	2898.61	4602.17	3396.73	7807.08	15465.5	371.214	6328.54	5760.55	3274.84	962.634	5459.06	7795.87	3127.03	4123.89	2596.84	6294.03	4079.68	36275	8840.39	791.308	11256.1	14295.2	5202.7	6500.9	5802.39	3123.46	952.516	4316.39	2264.1
M391T165			391.14	165.339	256	1.06	6741.04	3988.74	2999.9	2452.23	3272.63	3890.91	1686.62	23970.9	16337.2	22408.7	5577.91	14547.7	16568.5	7311.55	22822.5	37519.2	26741	9088.57	7495.93	20733.4	12580.3	2473.61	2423.23	2586.34	6728.52	16571.4	6156.63	6104.2	29141.3	24907.3	23292.5	30582.8	16477	24880.2	5563.52	2924.63	2777.69	2452.26	2836.18	2707.08	2739.57	179.333
M448T454			448.306	453.788	257	1.06	95703.2	9954.13	2629.99	6771.02	12984.1	25608.5	39371.9	9088.35	19954.5	27602.8	35640.5	3878.29	19232.9	13023.6	48474.6	72375.6	39857.2	22056.1	23944	41341.5	20559.7	2452.39	9098.55	3651.05	255128	76568.2	69379.6	108383	6324.79	39982	19141.2	16197.7	121207	40570.5	46713.3	3292.59	523.98	6342.7	862.822	500.156	2304.45	2539.08
M391T256			391.177	256.172	258	1.06	42597.2	2089.7	2688.41	2545.01	5190.47	11022.2	17692.5	8256.06	5058.85	6331.97	2777.71	5941.15	5673.15	1996.13	24982.8	11711.4	16745.4	17116.2	3739.81	14859.1	7821.25	18252.5	5308.66	6400.53	82489.9	109140	44318.4	48212.8	79667.1	46675.1	80630.7	101780	22681.9	66287	31347.2	4863.58	6913.82	3762.99	5074.72	3360.33	4795.09	1387.05
M389T249			389.069	248.637	259	1.06	712.19	706.38	884.826	967.778	782.016	810.638	113.553	7807.49	9546.72	8132.4	8464.43	10223.8	8834.97	1015.14	4041.27	1879.21	6139.59	1128.62	3823.13	3402.36	1972.79	835.491	568.89	1265.42	810.783	1062.23	908.564	265.161	11677.4	11580	11301.6	13800.5	9328.67	11537.6	1587.21	5005.1	4602.04	4191.62	4266.04	4392.01	4491.36	326.599
M362T240			362.114	240.096	260	1.05	942.566	939.5	917.825	1051.8	1012.02	972.741	56.6214	628.162	887.964	2088.83	1022.12	713.999	1068.22	590.633	1347.79	2454.28	9799.37	2600.89	5208.28	4282.12	3393.95	1117.99	1231.67	1513.54	1901.57	1727.34	1498.42	328.268	11839.4	78077.6	13666.3	18728.3	70255.7	38513.5	32761.4	10011.9	7457.57	11017	8671.51	6918.48	8815.29	1713.28
M513T400_3			513.376	400.044	261	1.05	18404.4	22885.3	19704.3	29909.7	3751.47	18931	9584.63	18770.7	72227.8	14841.7	35904.8	45630.6	37475.1	23123.9	28567.4	11534.7	69582.5	59794.9	73637.2	48623.3	27237.8	65672.1	90891.4	94362	50068.8	46127.6	69424.4	22439.8	79040.2	73633.1	74347.2	40211.3	85596.1	70565.6	17626.9	120922	64127.6	118716	138921	16063.3	91750	50731.5
M415T379			415.303	378.55	262	1.05	2756.81	1732.4	3756.34	3959.01	9291.52	4299.22	2928.36	6117.53	4666.37	4626.55	3748.95	12603.2	6352.52	3596.07	3400.58	5798.79	4269.02	6877.58	3916.92	4852.58	1442.24	18406.5	31941.8	59680.6	42838.2	27129.2	35999.2	15907.7	12969.5	6440.22	10721.5	15153.6	26942.4	14445.4	7694.23	22585.1	45910.2	54972.4	18232.1	76556.7	43651.3	24010.2
M315T386			315.254	386.329	263	1.05	1749.82	2162.84	2064.13	1770.62	1224.15	1794.31	366.143	3094.37	8929.79	3423.43	4866.02	6320.18	5326.76	2386.8	4295.89	3353.04	8202.48	5662.37	11492.1	6601.17	3287.52	9807.11	9275.77	8338.67	17892.7	21151.7	13293.2	5825.61	28255.6	16470.9	26853.3	31410.2	28519	26301.8	5739.76	144897	20731.4	141030	31250.8	7598.51	69101.5	67958.8
M743T399			743.486	399.404	264	1.04	6165.39	4949.9	3200.66	5417.52	6854.03	5317.5	1387.98	5470.17	7034.54	71299.6	5515.29	7259.35	19315.8	29071.7	3023.95	3431.17	5067.04	4564.79	5516.1	4320.61	1062.83	6901.33	18180	6804.86	4843.23	5665.71	8479.03	5489.42	24063.9	5320.63	4354.26	26438.2	5719.84	13179.4	11063	1828.97	6371.91	4988.75	3355.79	3890.01	4087.09	1710.71
M357T342			357.375	342.039	265	1.04	995.175	5109.43	1822.56	34198.8	74595.3	23344.2	31779.2	4966.38	1474.01	2507.9	1024.6	2198.75	2434.33	1531.48	3877.18	4095.01	5383.84	9575.65	1040.16	4794.37	3107.75	4400.69	2548.97	3542.61	8614.92	6732.68	5167.98	2470.8	4624.72	10669.3	29498.1	11690.1	3856.48	12067.7	10353	4981.39	7304.37	9789.15	3334.35	2173.75	5516.6	3068.96
M354T403			354.253	403.489	266	1.04	6651.55	12262	10898.3	12115.2	6854.41	9756.3	2793.2	8016.88	6860.98	5575.79	9708.23	9057.35	7843.85	1664.98	11568	8402.68	7075.84	11435.9	6967.76	9090.04	2273.6	9562.83	6797.68	5420.26	4123.23	4094.2	5999.64	2281.48	8224.34	5759.12	4456.24	1129.58	6073.04	5128.46	2613.3	5618.58	108101	15454.4	96713.8	95671.2	64311.7	49453.8
M358T427			358.304	427.192	267	1.04	8298.43	11369.7	9495.5	11450.6	4439.64	9010.78	2879.02	13550.7	30241.3	18949.2	17701.9	22589.2	20606.5	6279.5	23762.7	15230.1	36781.5	49225.7	47631.2	34526.2	14841.6	16655.6	17694	19204.9	13170.6	12681.1	15881.2	2851.38	36763.9	30765	55971.8	24497.4	16668.1	32933.2	14881.8	147109	4177.05	231026	904.255	6212.99	77885.9	105759
M196T376			196.117	375.721	268	1.04	55463.6	69306.8	84150.2	66475	55425.3	66164.2	11866.9	50510.8	37289.1	44988.5	54477.4	42748.5	46002.9	6702.42	65357.2	50543.4	49607	59514.2	29554.4	50915.2	13607.4	70478.4	53441.9	65453.8	80881.5	44116.6	62874.4	14401	82401.6	86449.1	77330.8	65386.8	70696.9	76453.1	8539.21	32761.9	26656.3	19588.5	33333.8	24568.9	27381.9	5778.12
M352T391			352.18	391.378	269	1.04	26546.8	11877	11064.7	11018.3	10743.2	14250	6887.13	5575.56	2295.42	2712.31	4016.87	2285.85	3377.2	1418.22	7053.24	7811.47	5256.39	9281.08	2073.44	6295.12	2770	4642.45	3570.8	4265.46	9672	4296.88	5289.52	2480.57	17366.5	16628.9	17745.2	11790.8	19614.2	16629.1	2920.18	14435.2	777.576	11135	18598	797.34	9148.61	8077.78
M275T73			275.052	72.85	270	1.03	2601.81	2908.23	2001.24	1501.14	2088.2	2220.12	548.047	12924.4	9943.96	12453.5	9561.38	9554.29	10887.5	1660.4	14438.7	16889.4	11894.7	16387.9	9831.21	13888.4	2999.65	3705.41	1784.81	1286.36	1627.64	4610.48	2602.94	1466.25	20614.8	23080.1	21376.6	27529.4	28361.1	24192.4	3552.39	10935.4	10687.5	9692.1	7915.53	10442.1	9934.53	1220.81
M325T363			325.152	362.644	271	1.03	9056.37	9872.78	9687.73	8687.16	9059.34	9272.67	491.816	1478.14	27606.2	52612.2	22717.4	25056.7	25894.1	18191.5	1370.22	31462.5	23110.5	6483.67	11497.7	14784.9	12320	4811.19	4254.12	6898.63	12643	3084.79	6338.35	3785.66	14459.4	14710.3	11363.6	11611.8	12394.1	12907.8	1579.9	6407.34	5187.12	4630.18	5098.35	5035.47	5271.69	669.747
M255T421			255.233	420.748	272	1.03	76275.7	64432	69197.4	66090.5	84349.9	72069.1	8228.45	64951.9	32707.3	59493.1	54270.8	50899.8	52464.6	12261.7	87033.1	84142.5	60633.4	80294.8	35316.2	69484	21711.1	77585.8	28721.2	41463.9	31367.7	48267.3	45481.2	19587.6	46586.5	53733.6	74287	54214.5	47324.8	55229.3	11221	79858.7	15342.1	93198.8	21877.3	17028.5	45461.1	37861.1
M362T441			362.335	440.997	273	1.03	2077.83	4522.91	3547.74	31808.7	58691.3	20129.7	24838.5	4678.54	1624.71	1348.19	1652.1	3397.34	2540.18	1445.24	778.483	3881.19	820.31	1078.77	1000.43	1511.84	1330.31	1354.94	1336.67	1784.45	1922.22	1287.13	1537.08	293.825	2737.31	4977.15	20325	3185.54	1499.6	6544.92	7803.63	2307.82	4587.72	2327.13	6442.63	5965.59	4326.18	1956.1
M541T380			541.457	380.429	274	1.03	3872.44	6799.2	3826.85	5358.75	4281.79	4827.8	1263.04	2283.35	4352.61	2034.03	2798.5	3234.89	2940.68	915.756	1744.47	1340.2	3400.23	1692.63	9082.77	3452.06	3247.27	29833.1	47216	31202.8	68319.7	91030.7	53520.5	26100.5	63496	33862.9	58104.1	75498.3	68230.9	59838.4	15864.9	19530.3	10624.7	11314	5912.9	8860.37	11248.4	5078.23
M565T435			565.364	435.368	275	1.03	32150.5	28255.6	16376.5	16579.5	7634.31	20199.3	9916.29	12020.5	7690.14	5361.05	14013.5	12501.2	10317.3	3633.13	15556.3	10615.2	16751	18922.8	21232.7	16615.6	3993.32	63561.2	73637	43090.8	33710	105953	63990.3	28318.6	77554.4	92064.8	70274.3	132289	67775	87991.5	26506.6	55123.7	3920.51	64146	1466.84	1319.92	25195.4	31617.1
M606T519			605.525	519.097	276	1.03	26972.8	52406.9	16167	12805.7	16913.5	25053.2	16179.7	17858.2	29894.1	20074.6	27529.7	10063	21083.9	7938.07	21960.5	30739.5	48580.4	13979.4	29089.6	28869.9	12860	38976	29399.8	40886.1	109948	34509.4	50743.9	33391.4	60638	48265.7	43762.8	58467.7	118933	66013.4	30398.9	8985.8	4768.98	6993.37	2348.23	3237.52	5266.78	2724.7
M271T130			271.106	130.319	277	1.02	3428.18	1913.3	2499.02	558.119	2659.77	2211.68	1070.81	1821.91	2823.77	2431.5	3450.64	2202.33	2546.03	622.705	3922.25	3852.3	4127.43	3895.49	2360.73	3631.64	718.296	3301.2	656.985	3294.28	5262.9	4428.01	3388.68	1737.21	26438.1	46778.1	24406.6	42917	19806.3	32069.2	11987.8	11925.7	11671.2	9633.92	8671.57	7073.1	9795.11	2046.77
M402T425			402.3	424.897	278	1.02	18584.8	7825.18	8952.96	5293.14	17085.5	11548.3	5913.93	2531.28	784.679	2684.37	1012.93	1339.11	1670.47	879.741	15518.1	16535.7	10173	19266.2	1595.77	12617.8	6989.73	21741.6	3826.74	6295.21	2173.52	8085.93	8424.59	7781.5	8189.69	16586.4	24953.3	6843.55	6804.28	12675.4	7978.79	20310	1159.62	32592.2	2846.17	1993.58	11780.3	14091.6
M412T441			412.212	440.699	279	1.02	587.174	718.508	908.159	958.599	843.692	803.227	150.536	1075.87	728.838	683.791	91089.8	829.293	18881.5	40365.9	727.814	576.162	611.427	889.032	411.613	643.21	177.995	554.257	488.088	770.279	321.796	395.087	505.901	172.283	424.694	438.006	484.47	408.057	541.302	459.306	53.9322	412.533	506.597	467.25	386.344	313.963	417.337	74.378
M354T419			354.27	419.04	280	1.02	6034.76	14245.7	15788.9	11318.8	7953.65	11068.4	4107.33	15641.6	24084	12346.6	20740.8	16215.3	17805.6	4611.02	24295.5	21130.8	34117.8	21332.4	30839.9	26343.3	5855.25	40587.2	33733.1	45016.8	20004.6	15978.3	31064	12672.7	48471.9	45892.3	51437.9	25896.2	15360.2	37411.7	15889.2	74423.1	113835	95386.7	17696.1	119304	84128.9	41091.2
M161T58			161.071	57.5365	282	1.01	8663.89	3060.08	2796.3	3276.54	6981.86	4955.73	2689.42	7504.88	4665.86	14987.7	10141.3	10787.7	9617.49	3855.67	20898.2	12282.2	25403.2	17480.8	13121.6	17837.2	5473.5	7288.79	6138.2	6928.86	10621.9	10295.7	8254.67	2057.87	36219.3	40492.2	36472.4	36968.8	17099.3	33450.4	9302.22	21312.8	24970.9	19256.3	23195.6	19196.4	21586.4	2512.99
M296T322			296.295	321.662	283	1.01	4852.58	15671.2	14343	47727.7	15358.5	19590.6	16353.2	5667.02	2722.74	2455.8	2760	6597.39	4040.59	1941.05	5231.8	3685.19	5700.31	16894.8	2971.08	6896.64	5698.47	3863.12	2073.84	3219.23	8208.39	18187.7	7110.46	6613.74	12592.3	17009	40689.4	10142.2	6960.24	17478.6	13484.2	6873.42	17727.5	16234.3	5034.61	1858.84	9545.73	7040.2
M311T516			311.258	516.044	284	1.01	38775.2	48152.4	35814.2	33671.7	28862.9	37055.3	7179.98	35364.1	54683.9	23649.8	44788.1	39475.2	39592.2	11476.1	39865.1	27731.5	45154.4	25659.5	38658.5	35413.8	8357.42	52062.3	73212.7	59494	78051.7	63564.7	65277.1	10454.3	63531.1	58776.1	63694.5	66452.4	83720.4	67234.9	9620.14	28570	18377.3	26260.6	9460.75	13454.7	19224.7	8157.6
M164T47			164.093	47.387	285	1	67801.1	36313.5	33366.9	31319.2	30123.5	39784.8	15836.4	31957.2	25568.4	14773.9	11316.1	24981.5	21719.4	8466.68	27565.3	16397.7	13737.1	27894.1	9798.93	19078.6	8239.66	20687.1	19954.9	23319.9	30236.1	25905.8	24020.8	4192.85	22705.7	16380.3	24645.6	20495.1	14149.3	19675.2	4357.55	7817.95	10684.9	7700.92	9012.41	8002.74	8643.78	1253.39
M245T306			245.079	306.243	381	1	33647.1	28561.2	33415.6	29352	38264.9	32648.2	3895.56	40250.2	25860.8	33546.3	28609.8	40547.6	33763	6655.12	37224.6	26256.5	33572.6	38812	30119.3	33197	5136.46	44453.5	146635	36454.6	40969.7	39144.9	61531.5	47662.9	81804	38849.8	30637.1	43398.4	189719	76881.7	66073	67968.6	123556	589772	148450	50330	196015	223706
M1000T403			999.745	402.65			417.863	879.941	606.115	881.586	334.946	624.09	254.077	453.05	812.848	362.404	573.906	806.98	601.838	204.24	844.107	551.781	659.186	800.401	984.397	767.974	167.527	1203.55	1165.99	1188.97	1031.28	520.442	1022.05	288.625	868.083	954.705	911.793	915.742	1017.01	933.467	55.8792	1195.94	653.903	1087.47	416.637	704.285	811.647	322.569
M1001T428			1000.89	428.149			522.013	768.346	282.495	1271.35	280.603	624.961	413.775	394.18	1063.13	107.299	325.798	1381.82	654.444	541.111	142.718	323.154	478.61	512.175	257.312	342.794	153.996	1482.51	1708.71	2418.14	3684.95	1006.81	2060.22	1041.01	667.187	722.54	1750.76	547.634	1154.1	968.443	493.657	1008.37	282.882	457.749	173.075	238.772	432.171	338.927
M1002T412			1001.86	411.809			1910.87	685.497	529.34	2024.55	231.858	1076.42	830.761	213.087	688.516	101.135	202.724	520.557	345.204	247.96	140.255	182.285	786.145	203.943	593.581	381.242	290.744	1519.51	3074.52	3134.91	3014.11	6761.97	3501	1943.79	1984.71	2097.68	1556.84	2384.25	2035.98	2011.89	297.659	4864.36	743.523	1456.61	479.084	914.182	1691.55	1809.36
M1004T446			1003.88	446.014			748.979	1633.12	1770.09	10096.4	1839.82	3217.68	3870.27	2647.59	1607.35	188.942	3177.99	28943.7	7313.11	12145.6	1418.86	1189.51	1083.43	12653.7	789.583	3427.02	5162.83	585.162	849.922	804.558	799.689	587.028	725.272	128.553	699.038	725.852	1074.75	349.614	323.603	634.573	309.9	558.609	748.642	1279.12	555.715	656.572	759.732	301.083
M1008T428			1007.86	428.314			5247.34	5476.59	2400.1	6184.22	968.284	4055.31	2249.59	3226.42	16158.5	952.356	7405.2	9373.15	7423.13	5907.48	3834.91	1774.27	14836.8	8141.37	19223.6	9562.18	7359.28	15408.6	13324.7	15856	11741.3	12919.8	13850.1	1735	22092.6	21630.8	27241.1	16929.2	12599.6	20098.7	5559.21	39891.2	2553.72	3982.41	1957.02	2463.97	10169.7	16631.9
M1008T456			1007.9	456.474			739.504	439.958	822.937	937.56	1047.31	797.454	231.23	795.37	716.085	140.058	706.274	929.209	657.399	302.652	553.866	310.747	453.857	723.473	621.831	532.755	158.324	2263.44	4787.11	4607.76	12466.6	2802.16	5385.41	4108.68	2222.48	1919.41	2815.78	1727.66	8827.32	3502.53	3005	3802.32	1284.85	1974.18	418.017	896.951	1675.26	1318.39
M1010T447			1009.89	447.409			1367.59	2456.49	1983.23	1802.21	1154.1	1752.72	514.186	1921.35	1473.59	1271.04	1957.73	1724.04	1669.55	294.376	1211.25	1707.14	2695.61	1381.94	4003.85	2199.96	1160.74	2200.5	4154.11	3440.65	1678.16	2513.71	2797.42	992.964	3501.88	4184.32	4069.36	2514.25	1855.7	3225.1	1011.19	4215.13	3372.24	4194.97	1294.73	1455.56	2906.52	1439.84
M1011T428			1010.87	428.256			875.354	1141.64	415.727	1881.55	490.256	960.905	592.938	1051.79	2087.3	239.946	1481.19	3234.65	1618.98	1126.07	597.018	541.972	1781.18	1546.73	1710.31	1235.44	614.15	1332.34	1493.72	2060.18	1393.49	1571.23	1570.19	288.85	1911.48	1475.61	2907.31	1470.83	1709.59	1894.96	594.815	4310.52	2456.63	2021.09	2758.4	3190.99	2947.52	873.508
M1012T442			1011.89	442.493			1649.42	895.823	1105.4	2496.81	779.473	1385.39	705.368	973.555	887.643	380.377	816.145	1093.28	830.2	271.844	1185.1	922.087	2276.43	1340.34	2202.44	1585.28	616.146	1017.56	1127.08	1568.14	972.892	4117.73	1760.68	1338.56	805.271	1388.55	1053.77	767.567	596.863	922.403	307.497	5483.09	1575.89	1852.61	832.062	1009.98	2150.73	1908.15
M1013T447			1012.77	447.096			955.907	1227.54	810.074	1220.71	1106.74	1064.19	179.785	1379.3	1355.63	771.456	843.383	1359.2	1141.79	306.432	542.984	617.788	903.666	2180.26	1313.01	1111.54	669.519	1043.25	1087.31	1769.1	1224.52	909.165	1206.67	333.958	1001.95	1227.15	1367.35	707.419	751.812	1011.14	288.586	832.366	905.159	1126.52	614.745	503.424	796.444	245.427
M1014T441			1013.7	441.212			2565.13	2613.5	11364.9	1336.23	3968.22	4369.6	4019.84	1967.6	952.12	1421.79	1931.41	1502.76	1555.14	417.092	1298.66	387.517	474.183	800.478	435.678	679.303	382.378	1363.28	1703.6	4954.15	2481.16	2801.72	2660.78	1406.36	1085.17	850.953	1340.06	861.482	38905.3	8608.6	16937.6	1576.34	573.968	344.278	422.549	193.457	622.119	550.826
M1014T443			1013.9	442.688			402.237	309.227	503.37	602.461	138.918	391.243	178.676	364.685	468.266	83.5443	240.727	712.899	374.024	237.672	471.898	415.462	371.183	586.706	522.107	473.471	85.1733	396.312	593.387	493.757	369.028	1079.87	586.472	289.625	414.717	470.65	362.396	273.507	311.524	366.559	78.8335	1294.2	857.617	4202.04	807.637	1041.71	1640.64	1444.52
M1014T453			1013.83	452.722			267.358	437.783	285.915	481.28	518.003	398.068	114.618	327.827	485.882	118.341	421.53	563.62	383.44	171.596	492.534	221.142	422.224	1047.23	296.643	495.955	325.808	1072.62	927.165	1894.35	1366.01	906.841	1233.4	412.526	832.261	941.017	867.645	816.103	4111.1	1513.62	1452.83	1114.15	1306.57	1088.51	707.911	547.246	952.878	313.867
M1016T426			1015.89	425.792			1466.16	3679.14	2754.35	6433.39	2075.77	3281.76	1944.2	2236.84	1907.42	283.376	2270.4	5434.43	2426.49	1868.85	865.192	1224.97	2007.08	2058.38	907.917	1412.71	583.096	1955.34	3975.59	3153.02	5515.64	1642.49	3248.42	1575.53	2493.02	1338.81	3818.01	1839.97	1480.7	2194.1	1011.47	1634.73	885.114	2759.14	541.477	1246.21	1413.33	855.465
M1017T421			1016.86	421.202			6524.6	5983.94	3668.75	7367.65	3188.79	5346.75	1826.87	1158.32	1564.9	615.631	1376.47	4176.71	1778.4	1387.04	2063.38	2163.67	3735.76	3239.61	1516.54	2543.79	913.165	6193.13	3132.1	2514.14	1637.52	5920.03	3879.38	2059.49	5048.83	7227.56	8365.44	6142.91	3889.21	6134.79	1760.11	2133.35	585.5	2355.66	460.264	652.437	1237.44	925.247
M1020T444			1019.86	443.745			1022.53	1103.94	2093.95	1223.01	1136.36	1315.96	440.798	1547.6	1575.11	510.654	1110.07	1371.8	1223.05	439.227	683.942	554.244	881.028	1161.93	722.476	800.724	233.147	4014.53	2731.47	7312.96	1565.91	940.158	3313	2525.5	1189.56	1168.76	1140.93	919.397	808.994	1045.53	170.945	901.779	1118.31	1815.12	743.817	1469.16	1209.64	434.185
M1021T437			1020.89	437.272			1569.78	191.414	2762.26	3091.35	2386.26	2000.21	1159.46	865.671	1008.71	829.977	705.934	3197.72	1321.6	1054.32	1798.29	1168.14	1691.74	2099.9	885.152	1528.64	492.365	4338.59	2543.66	2400.28	2331.83	3908.92	3104.65	945.721	449.648	4191.03	3602.1	2443.81	3649.04	2867.13	1493.96	1290.5	1663.19	2796.38	758.749	1422.87	1586.34	753.204
M1022T442			1021.88	441.988			1034.93	1202.22	1152.27	1342.91	957.034	1137.87	149.739	1391.7	1691.73	343.746	1239.92	1494.55	1232.33	523.175	1192.99	657.837	2491.71	1722.22	1980.55	1609.06	708.487	3662.15	4485.51	3817.81	2545.88	3523.21	3606.91	698.616	3491	3669.15	2562.93	3431.09	3347.48	3300.33	428.793	2504.79	1244.49	1438	920.216	1363.44	1494.19	598.614
M1027T425			1026.84	424.999			3075.7	2478.04	1263.98	1716.49	1191.77	1945.2	813.323	664.389	977.511	260.703	870.445	1112.94	777.198	332.053	820.653	724.796	2294.6	1455.17	1061.16	1271.27	637.741	8082.62	2163.51	2978.49	2877.32	3880.15	3996.42	2364.25	2933.26	5628.8	6888.98	2852.06	1995.25	4059.67	2089.03	2668.78	613.783	994.31	589.172	649.52	1103.11	890.571
M1028T425			1027.85	425.364			2472.73	1997.23	740.249	2061.86	1245.63	1703.54	697.122	1096.49	1387.77	579.249	1108.99	1575.36	1149.57	376.753	1079.24	1154.95	2113.62	1740.06	1654.94	1548.56	430.834	5585.23	1471.91	2092.53	2126.72	3013.33	2857.95	1620.49	2285.17	4251.23	4718.78	2127.98	1414.49	2959.53	1440.21	2853.1	1741.16	2822.17	1247.4	2107.7	2154.31	694.567
M1029T425			1028.85	424.841			963.225	1082.37	1060.76	1031.88	415.794	910.804	280.34	922.274	826.586	467.458	698.891	1133.1	809.661	248.472	361.159	745.273	1013.02	920.502	1032.06	814.403	277.619	2381.56	929.533	1403.16	1094.03	1071.94	1376.04	588.042	1194.38	1693.48	2235.01	659.783	1009.3	1358.39	615.948	574.728	1248.17	2257.9	1143.43	1351.89	1315.22	606.696
M1030T428			1029.84	427.65			1176.24	1695.24	743.27	2090.76	773.158	1295.73	588.271	1252.4	3232.69	479.383	1794.67	2147.56	1781.34	1026.6	799.854	814.694	2626.3	2105.84	2504.95	1770.33	899.999	2545.81	2556.17	3718.53	1491.97	1865.72	2435.64	849.677	2996.22	2784.08	4114.43	2059.92	1433.74	2677.68	1013.17	3815.02	2207.65	1742.25	2736.33	1269.96	2354.24	981.268
M1030T443_2			1029.9	443.154			486.314	499.249	399.861	647.975	521.244	510.929	89.3958	485.443	549.253	172.399	343.271	801.244	470.322	234.983	502.466	451.089	661.829	577.709	499.166	538.452	82.5131	1211.73	1011.97	1096.65	1004.37	1018.22	1068.59	88.2372	879.357	896.516	1491.56	756.231	567.505	918.233	346.388	1323.02	861.39	824.356	434.25	525.577	793.718	348.853
M1032T429			1031.85	428.838			2420.19	1004.63	1132.1	1776.85	1091	1484.96	606.277	912.887	1505.68	421.087	964.458	1844.66	1129.76	554.297	781.021	944.319	1207.25	1376.08	910.695	1043.87	241.761	1920.37	1670.86	2551.61	1837.61	1349.82	1866.05	441.12	1959.52	1324.88	1896.01	1834.48	1859.28	1774.84	255.899	1684.93	1090.46	1504.72	556.825	968.735	1161.14	447.106
M1034T431			1033.88	431.029			1793.12	1635.92	1523.39	2269.93	2042.44	1852.96	303.755	1501.26	4018.22	644.905	1877.08	2201.68	2048.63	1245.21	1228.46	1567.06	3035.84	2779.72	4235.51	2569.32	1208.36	4941.42	7629.15	6706.2	7110.45	4536.43	6184.73	1367.29	9645.3	5636.4	5549.2	5458.28	7962.09	6850.25	1880.97	5970.89	1783.81	2046.27	1233.4	2396.64	2686.2	1884.64
M1035T412			1034.87	412.346			845.27	1638.73	821.428	2542.71	616.437	1292.92	800.295	385.285	1162.98	133.885	967.562	966.112	723.165	439.775	251.974	184.175	1755.56	387.562	1684.26	852.707	795.426	22095.4	7118.31	6775.08	9805.05	5911.88	10341.1	6730.01	10099.8	15390.5	13763.1	9479.04	8594.81	11465.4	2946.88	1837.36	524.716	681.335	322.68	662.346	805.688	594.266
M1035T449			1034.91	448.816			9010.4	9601.03	7978.09	8451.86	9343.68	8877.01	661.172	10349.7	12682.4	5259.91	8493.35	5214.08	8399.9	3246.53	5997.56	3735.9	10850.4	7049.26	16184.1	8763.44	4880.73	11038.3	10689.4	12707.1	7355.34	6579.47	9673.93	2600.21	9757.75	12219	13602.2	9437.59	6470.79	10297.5	2751.7	12823.4	5781.66	7335.43	3540.7	3384.89	6573.21	3861.15
M1038T443			1037.91	442.566			6475.47	1816.92	2531.99	10665.8	1210.23	4540.09	3993.95	1370.13	997.562	717.143	1325.07	1355.26	1153.03	288.008	1839.12	1296.19	3559.8	3049.75	1991.42	2347.26	929.156	958.663	1176.14	3527.89	1464.48	4844.54	2394.34	1710.13	727.655	1260.62	997.358	835.924	825.222	929.355	208.935	3800.16	1966.41	857.208	1102.7	1023.18	1749.93	1224.17
M1048T434			1047.86	433.597			3932.34	3267.06	2565.51	3340.42	2731.93	3167.45	542.429	1502.92	1408.86	849.29	1306.56	2792.08	1571.94	726.764	1962.97	2029.89	1908.81	3160.98	2130.19	2238.57	522.213	9870.53	2431.17	2240.37	3353.63	12216.6	6022.45	4677.04	2997.47	2647	3174.72	11647.9	14810.2	7055.47	5748.67	4177.77	1755.74	1967.23	1526.08	2659.37	2417.24	1071.49
M1051T454			1050.88	454.37			764.489	392.119	478.528	673.752	473.956	556.569	155.661	491.715	493.151	113.485	616.969	662.611	475.586	216.017	637.476	267.369	691.263	1139.27	535.306	654.138	316.514	4316.55	2938.59	2945.32	1579.73	4776.18	3311.27	1267.63	1644.81	2128.08	3242.39	5804.53	8438.38	4251.64	2840.07	3816.35	655.685	1167.27	811.259	499.964	1390.11	1378.69
M1053T441			1052.77	440.926			1202.02	936.432	4089.78	646.391	1200.28	1614.98	1402.3	558.156	447.605	295.554	902.31	657.919	572.309	228.35	756.103	260.318	495.739	631.645	329.214	494.604	205.795	511.043	683.333	2023.41	979.346	751.244	989.675	601.766	284.358	554.346	555.075	452.765	13040.7	2977.44	5626.6	572.276	512.294	270.728	345.699	273.327	394.865	139.52
M1053T483			1052.75	483.469			225.003	261.49	197.79	355.459	261.706	260.29	59.6071	265.389	291.876	155.145	293.639	516.731	304.556	131.488	118.017	262.525	208.129	241.011	377.558	241.448	93.9624	1007.87	1113.9	1182.58	806.118	507.824	923.658	272.514	888.297	1188.11	1689.23	368.018	750.376	976.805	495.46	2734.95	5087.81	5838.53	529.173	436.295	2925.35	2506.8
M1056T442			1055.92	441.507			866.235	1077.06	960.176	790.246	1052.86	949.315	121.823	616.16	837.466	296.492	624.46	1292.65	733.446	367.455	1051.86	684.763	1129.81	1216.86	1264.29	1069.52	230.015	3608.84	2001.7	2570.1	2067.24	4217.32	2893.04	980.665	1659.72	1888.51	1643.14	1914.51	1934.19	1808.01	143.976	4822.58	1034.93	1043.44	738.127	895.145	1706.84	1746.19
M1079T489			1078.77	489.136			238.451	225.383	133.683	333.396	135.348	213.252	83.0918	243.711	538.708	287.61	245.086	601.523	383.328	172.857	72.2459	213.469	325.137	360.776	593.285	312.983	192.911	1164.1	1404.29	1349.63	939.215	746.619	1120.77	277.305	1307.1	1525.23	1721.36	639.349	975.7	1233.75	432.436	1508.3	1745.72	3188.05	1738.91	1434.29	1923.05	720.502
M1082T442			1081.93	442.296			1370.26	1429.37	1712.28	1628.37	1086.72	1445.4	244.571	685.519	794.717	375.781	740.998	1166	752.604	282.534	1440.14	617.888	1975.85	3185.89	1581.12	1760.18	937.88	3373.19	1759.12	2308.32	2125.2	4732.39	2859.64	1206.79	1467.07	2042.99	1465.78	1993.1	2463.92	1886.57	424.91	3193.44	1006.28	1352.18	967.761	676.374	1439.21	1009.52
M1095T418			1094.87	418.154			805.059	1233.51	1256.94	2239.29	672.749	1241.51	614.377	373.071	696.308	197.177	624.439	1014.98	581.194	313.876	571.594	425.23	1386.87	832.79	1132.82	869.861	395.12	5635.95	3534.96	4369.78	6432.85	2151.6	4425.03	1692.74	3273.17	4898.55	3792.24	2995.41	3397.24	3671.32	743.507	849.371	1038.13	712.508	625.191	654.546	775.949	170.016
M1097T455			1096.95	455.481			488.243	395.239	568.826	503.958	448.524	480.958	64.6189	589.134	451.104	191.696	353.546	567.269	430.55	163.741	430.333	244.519	296.369	615.571	397.216	396.802	143.406	732.086	983.593	1900.83	2018.88	1044.37	1335.95	582.946	1080.61	1101	1388.65	499.992	5474.31	1908.91	2019.07	856.791	712.996	922.005	339.252	530.341	672.277	239.332
M1100T441			1099.94	440.762			532.895	498.982	717.627	906.865	524.622	636.198	174.528	618.532	634.127	357.876	495.38	1124.87	646.158	289.792	693.195	654.85	1205.28	1002.63	1265.07	964.204	282.515	1047.43	698.919	866.689	1105.04	2692.16	1282.05	804.261	577.623	540.008	620.838	462.178	497.908	539.711	62.8051	3354.26	999.874	1155.89	687.943	765.662	1392.73	1112.2
M1102T440			1101.75	439.628			1493.19	1976.46	9215.06	1280.11	2385.74	3270.11	3350.96	1799.38	790.17	1001.95	1485.35	1043.89	1224.15	409.061	949.2	469.14	517.263	871.631	489.659	659.378	231.43	1358.74	1432.7	3997.2	2055.61	2115.54	2191.96	1067.01	954.659	896.262	1242.95	475.171	35395.5	7792.9	15432.7	1221.43	481.384	525.314	384.709	266.567	575.881	374.314
M1102T492			1101.85	491.892			145.806	266.237	305.509	484.874	224.73	285.431	126.223	443.383	373.13	215.07	313.699	816.96	432.448	230.674	135.93	169.237	192.354	477.391	397.613	274.505	152.767	2237.49	1474.29	3759.98	865.94	558.391	1779.22	1279.74	710.225	643.2	1172.26	477.595	585.808	717.818	267.991	709.894	586.535	1140.98	520.822	496.852	691.016	264.765
M1105T426			1104.94	425.979			573.698	876.494	508.122	1744.54	559.653	852.501	519.229	506.231	1418.3	171.305	837.906	1963.77	979.503	717.382	362.172	317.042	763.473	647.079	460.277	510.009	190.13	691.549	847.668	1212.35	627.388	612.216	798.235	249.555	2030.47	747.803	1341.77	389.382	571.093	1016.1	670.411	612.094	466.688	617.057	332.66	472.259	500.152	118.479
M1107T494			1106.8	494.202			301.766	259.688	321.267	687.045	327.591	379.471	173.973	449.526	966.856	381.907	413.557	1116.69	665.708	348.187	210.223	169.185	641.261	1456.72	945.535	684.584	537.777	2763.46	2099.86	4283.22	1019.02	1035	2240.11	1361.18	1428.98	1683.35	3358.13	632.124	999.258	1620.37	1051.52	4376.94	4233.01	6094.39	6084.02	2571.76	4672.03	1475.45
M1129T424			1128.94	423.727			504.129	612.412	696.294	1104.31	1130.73	809.574	289.4	790.386	806.01	314.919	545.81	1104.36	712.298	297.584	257.458	571.338	380.808	752.149	449.079	482.167	188.881	436.833	373.466	748.357	672.699	421.814	530.634	168.024	497.35	321.062	892.981	424.68	464.754	520.165	218.713	370.626	476.152	900.654	379.761	314.894	488.417	237.635
M1131T499			1130.75	499.174			128.955	342.963	330.925	305.432	237.235	269.102	88.3943	311.681	471.741	507.76	508.638	425.706	445.105	81.9298	214.463	58.1695	501.79	427.124	291.288	298.567	175.174	1202.22	468.865	2954.87	542.497	550.693	1143.83	1055.02	807.745	1240.03	928.106	407.798	1184.6	913.657	334.384	654.814	1710.81	1953.18	515.285	315.386	1029.9	747.018
M1138T411			1137.88	411.312			1201.79	559.582	335.281	962.925	171.171	646.149	429.773	205.824	587.847	50.6181	405.971	496.844	349.421	218.907	202.184	100.519	541.695	256.841	1781.42	576.531	693.162	32772.5	378.209	28293.5	25072.9	29032.2	23109.9	12999	30219.1	26983.4	19749.5	34343.7	15040.4	25267.2	7824.36	11372.6	704.123	1514.31	352.676	753.238	2939.38	4733.29
M1140T454			1139.98	454.374			658.107	332.417	634.96	515.295	432.982	514.752	136.87	539.49	392.477	62.3712	422.626	639.484	411.29	218.366	160.355	216.259	294.431	545.99	459.755	335.358	163.039	645.648	673.35	2264.02	1636.1	679.462	1179.72	737.544	1101.05	1004.21	1290.14	657.799	5717.57	1954.15	2116.3	1007.26	1026.96	940.164	188.745	405.095	713.646	389.363
M1147T439			1146.78	438.682			741.293	1068.63	3872.14	682.376	999.084	1472.7	1351.34	876.227	389.618	291.862	631.384	649.175	567.653	231.129	630.604	132.648	338.976	544.755	318.913	393.179	197.279	401.022	648.709	2001.61	890.405	1047.18	997.784	612.293	320.661	484.578	492.536	398.789	17487	3836.72	7631.07	655.844	224.145	234.202	234.26	130.605	295.811	205.935
M1148T425			1147.97	424.841			512.802	816.066	343.395	1136.07	188.059	599.278	379.867	311.185	726.111	113.454	545.61	1328.16	604.904	466.127	174.691	171.028	372.59	291.045	259.796	253.83	84.6221	695.027	1319	1144.92	409.719	411.64	796.062	419.053	1445.82	525.262	932.981	441.692	291.906	727.532	466.512	332.957	381.48	483.911	149.226	239.236	317.362	128.905
M1149T425			1148.97	424.816			288.334	511.256	132.084	671.293	173.525	355.299	229.96	268.86	578.871	14.6052	462.4	1052.07	475.36	386.785	129.912	160.473	418.463	204.028	190.264	220.628	114.22	645.24	613.657	724.888	529.923	273.655	557.473	173.349	318.543	407.817	747.72	281.627	288.665	408.874	195.972	127.612	238.617	232.935	181.068	166.662	189.379	46.6954
M1158T453			1157.99	453.481			278.096	276.4	354.624	341.236	387.483	327.568	48.9242	340.231	137.276	55.0699	280.569	408.46	244.321	145.541	92.4439	121.911	255.652	270.127	228.189	193.665	81.048	521.568	810.024	1434.12	1172.25	845.757	956.744	352.688	803.702	604.964	944.163	499.36	4672.73	1504.98	1779.2	516.372	321.732	604.701	196.193	370.988	401.997	161.191
M1170T441			1169.99	441.032			378.769	472.977	482.23	812.996	410.369	511.468	173.987	606.533	555.182	191.934	340.044	823.137	503.366	244.564	962.858	667.403	1083.9	1072.07	1315.65	1020.38	235.476	639.822	1885.8	924.642	519.516	3216.4	1437.24	1129.98	1401.3	474.175	335.763	699.23	696.701	721.434	410.245	1611.31	356.755	746.063	426.13	414.937	711.04	525.854
M1175T500			1174.78	500.46			49.9593	207.118	144.283	102.646	128.084	126.418	57.5446	171.113	292.52	261.603	288.472	229.585	248.659	50.1338	47.7406	31.8089	372.884	248.493	200.654	180.316	142.981	785.202	363.708	2316.44	501.57	347.74	862.931	831.257	338.944	1059.9	464.729	310.619	1117.43	658.325	397.626	645.877	1161.28	1284.37	184.128	115.971	678.325	538.995
M1178T450			1177.96	450.221			705.821	1605.52	1871.61	1182.71	833.251	1239.78	496.641	958.266	1522.54	350.27	778.37	1759.18	1073.72	569.041	961.335	486.547	777.478	1840.31	620.727	937.279	535.008	11619.6	11018.2	13788	7733.27	1369.36	9105.68	4838.28	2431.05	1802.87	2784.38	1063.43	1199.55	1856.26	750.75	1078.86	498.94	951.232	507.177	493.681	705.977	285.764
M1188T439			1188	439.376			209.528	254.209	315.894	686.262	288.561	350.891	191.647	283.899	544.19	102.123	249.365	1150.84	466.084	414.615	588.861	605.22	538.333	775.712	544.966	610.618	96.5581	453.086	393.339	689.998	570.129	1323.11	685.933	373.917	319.978	340.108	343.771	279.679	302.786	317.264	26.7116	1711.98	400.607	510.325	401.912	380.693	681.103	578.521
M1195T434			1194.95	434.32			2841.94	3459.72	2027.43	2630.16	893.092	2370.47	971.662	1910.73	1476.5	578.707	1934.83	2950.36	1770.23	858.13	1095.21	1016.41	2246.84	1290.93	3602.57	1850.39	1096.14	7845.08	22346.6	7271.98	4733.17	10656.2	10570.6	6911.32	15906.3	13174.1	9999.54	23701.4	6726.29	13901.5	6467.12	3666.31	498.401	1770.37	423.933	556.908	1383.18	1391.79
M121T104			121.048	103.69			12041.8	5439.97	2408.72	3632.88	15687.2	7842.12	5748.76	4960.4	3159.04	10257.3	4577.26	5607.25	5712.25	2694.49	5194.84	7676.36	6793.11	4715.95	6223.37	6120.73	1195.13	4484.24	5458.83	3931.1	26635.2	16069.2	11315.7	9909.42	7314.8	10004.4	11264.4	9432.71	8480.87	9299.44	1498.72	3462	3527.99	3423.96	3336.55	3262.99	3402.7	104.356
M136T92_1			135.54	91.6095			133409	2944.98	9705.49	7914.31	8352.13	32465.2	56487.4	16032.6	13367.5	9480.32	7174.51	12282.5	11667.5	3438.48	35251.9	15464.7	9016.53	19040.5	5008.14	16756.4	11692.9	9933.05	9055.9	7423.58	13067.1	12211.1	10338.1	2305.32	14505.9	8276.57	11564.2	12179.1	2790.43	9863.24	4537.44	5452.68	4486.36	4547.69	5523.9	3511.25	4704.37	825.713
M145T62			144.537	61.811			32914.1	549.239	8636.26	8637.28	4327.26	11012.8	12699.8	3450.27	2430.86	1432.26	1235.09	4165.77	2542.85	1266.24	8098.77	3166.35	1771.32	7465.72	691.897	4238.81	3359	9719.01	4320.24	10353.8	5499.95	6693.14	7317.23	2629.79	2540.28	1750.75	2455.32	2554.82	303.339	1920.9	963.917	771.282	1086.25	865.563	852.633	702.573	855.66	144.77
M150T131			150.054	131.239			18415.7	3301.03	8323.62	7174.32	7537.56	8950.44	5635.83	10168.3	6874.46	13563.4	6966.68	15166	10547.8	3771.06	18351.5	13473.3	17467	21777.1	10536.9	16321.2	4380.94	64118.4	49804.3	36442.3	31756	28120.9	42048.4	14820.4	42485.6	32362.8	53808.2	44859.1	13687.4	37440.7	15316.5	24046.5	20638.6	20135.7	25420.1	20902.6	22228.7	2353.55
M152T562			152.071	562.205			33461.8	4763.21	8402.11	8283.65	31734.1	17329	14028.4	25723.7	9689.1	24690	11790	13542	17087	7545.74	22192.9	29916.9	16180.5	12318.9	6333.3	17388.5	9074.97	10312.3	38005.7	11752.6	42420.3	85149	37528	30401.4	18133.9	29377.5	19064.2	16720.1	12434.4	19146	6257.9	9262.14	8612.92	8105.79	6143.35	6104.79	7645.8	1448.41
M155T263			155.107	263.35			2099.64	1571.09	109403	2086.88	1551.49	23342.4	48110	2851.45	127037	1681.03	1918.79	1650.58	27027.8	55909.1	2110.24	2553.05	2659.8	2649.22	1420.47	2278.56	529.795	6833.48	7065.48	5672.56	7872.36	6843.17	6857.41	787.095	10609.9	10282	10708.7	8635.93	9645.04	9976.3	856.962	9394.14	10334.8	9577.2	10776.1	10405.1	10097.5	586.7
M158T251			157.545	251.152			1472.25	1392.02	3370.29	4884.65	1055.15	2434.87	1642.73	313.752	480.438	512.321	513.222	514.7	466.887	86.7917	547.986	355.004	491.386	553.571	482.328	486.055	80.0165	17580.8	11307.6	13750.8	19527.2	18178.2	16068.9	3418.28	1842.41	1252.82	1661.83	1802.76	998.305	1511.63	369.871	1934.82	1183.74	1981.9	1598.03	1904.24	1720.54	335.833
M160T57			160.097	56.761			28759.5	2010.22	2445.24	2111.05	2473.57	7559.91	11852.6	17442.2	15853.5	2806.6	2421.4	1943.86	8093.52	7835.15	1692.33	1505.85	2723.43	2679.78	3180.8	2356.44	721.691	2884.95	1345.92	53353.4	2711.25	2761.84	12611.5	22784.1	3293.35	3181.47	3741.1	4858.94	4307.17	3876.41	705.716	2286.41	2374.55	1616.96	2763.98	2655.57	2339.49	448.942
M162T266			162.068	265.707			5935.71	3720.32	3267.79	3011.9	2641.02	3715.35	1301.86	3767.51	4073.92	4201.19	3504.11	5393.13	4187.97	726.297	5168.62	4610.39	4535.07	6680.22	2573.55	4713.57	1474.53	5563.86	5600.8	5777.66	22234.1	10883	10011.9	7199.18	6061.48	6300.1	7840.69	6086.28	4485.78	6154.87	1189.79	3180.84	4602.35	4091.4	4859.28	2876.41	3922.06	867.849
M163T66			163.051	65.8715			14623.7	11484.6	9240.47	14560	12553	12492.3	2258.96	20653.2	22933.8	22193.7	18661.2	17548.9	20398.1	2283.31	33587.4	27373.2	28810.4	22510.7	20431.3	26542.6	5221.74	5860.93	6146.71	6118.38	19944.9	8766.91	9367.56	6030.52	15748.9	12817	19149.1	16040.1	13672	15485.4	2460.11	8301.74	10778.8	7913	8097.84	9846.94	8987.66	1261.31
M164T277			164.083	276.727			5631.51	6349.99	7302.69	9568.29	6504.34	7071.36	1516.84	1878.74	1812.17	1702.82	2120.9	2631.79	2029.28	370.064	2308.21	849.753	2556.69	5058.78	2587.59	2672.2	1514.11	17688.4	12790.5	19656.1	16606.1	17170.7	16782.3	2509.8	22108.6	20172.8	20819.5	19103.5	14508.2	19342.5	2913.33	14987.5	17074	14638.6	15843.3	15853	15679.3	943.907
M169T39			168.969	38.868			772.994	2103.88	3326.72	2987.65	1775.9	2193.43	1014.29	2113.53	60122	2133.47	2760.6	2088.78	13843.7	25871.9	1901.8	2554.5	1913.02	2721.85	1544.08	2127.05	493.18	2816.22	4406.68	3581.95	2185.36	3121.84	3222.41	834.016	2928.73	2859.7	2712.07	2997.65	2988.33	2897.3	117.332	2789.96	2730.99	2789.44	2183.5	2208.36	2540.45	315.536
M172T67			171.548	66.982			5742.75	4287.79	4246.02	4361.18	3313.83	4390.31	868.919	6418.55	8982.81	5658.57	5726.09	8074.04	6972.01	1486.73	11516.2	7779.64	9819.62	8207.96	7128.55	8890.38	1772.12	980.65	530.961	1044.58	2094.22	818.86	1093.85	593.39	2374.96	2000.27	1887.73	2153.65	1411.66	1965.65	359.532	609.257	1383.96	836.834	918.212	1075.28	964.709	288.471
M177T365			177.118	365.394			906.798	976.635	3173.34	1772.84	1036.25	1573.17	960.288	1496.1	768.23	1076.5	1581.43	395.358	1063.52	497.283	2751.05	1605.64	1565.87	5441.9	752.918	2423.48	1831.21	3480.27	3474.93	5686.28	892.358	2060	3118.77	1797.74	4159.31	3341.08	3407.36	3376.46	1227.19	3102.28	1102.1	10347.7	7286.92	7578.61	7556.36	4771.01	7508.12	1975.56
M180T244			180.066	244.133			107560	879.13	3398.41	3329.67	4818.52	23997.2	46734.6	16624.7	14913	8816.25	5555.97	12770.8	11736.2	4521.66	30644.3	11994.4	9793.22	13375.8	3801.23	13921.8	10039	4474.28	4296	6144.62	8224.46	7517.42	6131.36	1761.88	7733.34	5260.02	7784.93	7800.28	2453.28	6206.37	2363.54	3622.06	5681.52	3806.15	4413.56	2046.7	3914	1318.84
M181T306			181.058	305.954			1942.17	2973.09	3070.39	1819.24	3037.01	2568.38	630.231	2337.86	2835.15	2425.96	2353.53	3034.13	2597.33	317.603	3341.15	2890.39	2310.62	2542	2284.65	2673.76	445.247	1989.02	5607.49	1406.7	2383.82	2769.54	2831.31	1631.73	3268.08	1726.89	1017.79	1625.93	7930.03	3113.74	2817.37	3282.35	5424.31	31218.3	6820.66	2257	9800.53	12105.2
M183T72			183.113	71.978			3894.33	72982.9	3248.88	23235.7	21776.4	25027.6	28436	3480.8	4747.13	633.277	18242.5	5023.91	6425.52	6830.87	32381.5	427.344	17282.7	17092.5	20309.3	17498.7	11413.2	7242.7	227304	6176.96	26708.3	38331.3	61152.7	93864.5	9036.05	29507.5	11189.1	8254.43	188140	49225.4	78145.1	16212.3	13576.9	13000.7	14373.6	12945.1	14021.7	1352.96
M187T42			187.108	42.439			9552.32	12124.5	13047.6	13324.1	9398.26	11489.3	1892.25	5723.85	4678.9	6565.18	7075.49	5534.04	5915.49	932.615	3236.9	7578.99	8798.51	7490.76	10360	7493.03	2647.91	27332.5	29663.1	25254	23675.7	27875.2	26760.1	2333.48	25882.7	26243.6	32728.5	15456.6	15296.8	23121.6	7576.97	29317.9	58223.6	24747.5	62055.8	69332.6	48735.5	20274.1
M189T174			189.066	174.364			3395.55	1745.66	2360.38	1199.74	2369.78	2214.22	820.035	1961.81	1518.36	520.159	1903.02	2082.87	1597.24	638.077	2651.42	4772.73	2724.57	1539.77	812.236	2500.14	1500.77	1823.12	2213	1929.57	3234.9	3445.43	2529.2	757.557	5888.19	9971.73	6155.64	11366.2	20001.8	10676.7	5729.32	3215.87	2833.62	2504.81	1853.61	2481.24	2577.83	502.912
M191T364			191.18	363.54			966.36	1520.06	2287.43	1971.59	1066.52	1562.39	569.224	1250.78	1179.11	1613.65	1318.03	1317.83	1335.88	165.545	1122.19	948.355	1171.17	905.459	736.239	976.683	175.132	6364.51	4310.06	3848.21	10304.5	2751.14	5515.68	2980.35	6525.03	7300.85	5281.85	6894.82	4668.17	6134.14	1114.46	2141.2	11355	1622.18	8906.02	9148.16	6634.5	4446.18
M192T363			192.115	362.685			22184.1	42039	42574	38510.3	25427.8	34147	9636.81	26265.9	23958.5	23881.5	33118.1	25157.2	26476.2	3839.61	30338	19453.5	27877.3	21125	16660.9	23090.9	5785.11	45816.4	40676.6	43269.3	57493.5	30342	43519.6	9776.75	50618.8	42901.4	46759.6	35477.6	40703.3	43292.1	5779.83	19555.5	17186.1	11185.2	21475.4	14279.3	16736.3	4106.73
M193T89			193.047	88.6145			2676.54	3537.98	4649.79	4478.62	2233.06	3515.2	1068.09	4941.97	3249.09	4668.69	5448.71	4650.33	4591.76	816.871	3897.42	3738.28	4094.49	4194.33	1566.51	3498.2	1094.14	6010.53	4202.4	4722.85	137754	6728.79	31883.7	59191.9	19164	23444.9	18110.7	16357.4	15139.5	18443.3	3198.14	6120.99	9446	5522.49	6434.69	5649.6	6634.75	1613.59
M200T116			200.076	115.655			1250.62	1628.89	1742.7	2223.3	2326.08	1834.32	442.843	2301.08	2228.06	2745.98	2565.54	2137.17	2395.57	252.704	2010.72	1710.59	2424.77	2381.8	1788.16	2063.21	329.761	25920.9	19437.7	22157.6	26370.4	16883.8	22154.1	4096.35	16741.8	13994.5	16398.1	13598.7	14209.2	14988.5	1465.26	15817.6	19190.1	17069.1	18737.6	16824.2	17527.7	1401.54
M202T446			202.136	445.747			14941.9	15346.6	15936.6	14675.1	12271.2	14634.3	1403.92	11393.7	12815.2	8341.84	13256.1	8493.08	10860	2334.13	15944	12730.3	13131.6	14133.5	8802.44	12948.4	2629.08	12159	6836.37	11721.4	5058.02	5680.73	8291.09	3395.22	7280.51	8839.4	10124.9	5244.74	5755.44	7448.99	2052.36	8620.89	1067.62	9724.34	840.303	657.87	4182.21	4574.58
M205T383			205.196	382.536			999.482	1200.26	2048.35	1188.05	1130.78	1313.38	418.499	1210.27	1408.42	1189.01	885.278	1470.04	1232.6	229.305	1479.57	1576.99	1811.97	2889.89	939.274	1739.54	718.153	26287.2	25466.2	23830.8	33629.5	25984.2	27039.6	3803.87	38439.8	35939.2	35062.7	33204.4	29031.2	34335.4	3512.86	32733.4	29572.9	28026.7	28028.3	26817.5	29035.8	2286.64
M206T255			206.191	255.167			613.456	509.769	506.057	569.426	692.405	578.223	77.8621	535.89	543.602	429.402	740.969	780.948	606.162	149.013	463.754	799.988	542.762	1026.5	375.582	641.717	267.114	2674.01	3693.15	1960.73	973.6	1298.85	2120.07	1094.95	810.159	1027.42	3671.28	1936.91	1227.19	1734.59	1162.3	5393.42	4588.85	4593.21	8359.3	4108.76	5408.71	1712.7
M206T393_2			206.131	393.076			38239.7	63629.9	65496.9	54140.3	50865.1	54474.4	10977.5	41530.7	36946.8	32874.2	47232.7	34961	38709.1	5740.49	55440.3	36169.8	37494.1	33331.3	21604.8	36808.1	12158	25406.3	22089.2	27715.6	17248.3	18322.1	22156.3	4479.45	19463.2	23964.5	17296	15297.8	20509.1	19306.1	3289.36	10164.5	6656.55	4651.53	14868.5	2789.46	7826.1	4792.62
M207T386_1			206.623	385.525			3177.45	1931.87	3176.5	4524.71	2451.29	3052.36	976.682	2602.63	8773.99	2807.24	3710.65	5728.63	4724.63	2579.38	4002.28	2132.5	8333.88	5129.36	7973.83	5514.37	2639.62	5834.75	3373.16	5592.78	12041.4	9412.24	7250.86	3442.82	15504.7	8891.21	13079	12205.6	8836.4	11703.4	2860.19	39125.8	36469.7	38109.5	33062.6	31184.4	35590.4	3369.76
M207T395			206.633	395.203			8869.04	3624.83	3489.38	2984.89	12116.8	6216.98	4075.74	9731.55	8476.37	6754.6	11710.3	8108.85	8956.34	1869.61	4154.52	7886.03	8834.45	7690.91	4949.72	6703.13	2030.23	5089.32	5114.48	5928.01	4122.81	4410.43	4933.01	703.012	4820.57	5139.33	3986.26	3329.29	4794.6	4414.01	740.914	1907.58	6237.84	2069.55	8303.49	4584.22	4620.53	2740.84
M209T376_1			208.642	375.789			4962.1	6427.69	7392.64	5240.32	5344.15	5873.38	1015.71	3987.05	2899.73	4034.07	5411.22	3620.82	3990.58	914.71	5541.72	5036.73	5240.33	4870.78	3172.31	4772.37	928.797	6445.62	5541.94	5641.54	7846.18	4565	6008.06	1225.17	8543.58	9523.79	7223.58	5468.95	5663.85	7284.75	1769.61	2868.86	2986.87	7924.12	3552.33	2350.03	3936.44	2269.76
M209T421			208.633	421.253			15465.1	15937.3	17031	14327.2	17156	15983.3	1171.11	13673	8305.52	10106.3	13272.2	10360.2	11143.4	2273.41	17749.5	17497	12169.2	15054.3	8025.57	14099.1	4074.19	8353.28	3970.53	6125.26	2483.54	4315.91	5049.7	2256.03	5477.08	7007.96	6008.08	3652.01	3427.81	5114.59	1541.02	5161.3	1034.83	5727.82	1266.14	998.439	2837.71	2390.34
M210T388			210.142	388.214			2763.56	3479.45	2471.21	3234.39	2243.16	2838.35	515.388	3220.53	6871.28	2064.64	825.402	5400.11	3676.39	2455.21	886.16	3206.94	1822.57	5258.3	8776.62	3990.12	3141.06	4153.52	4309.01	4560.36	5343.01	9587.78	5590.74	2280.78	7460.57	6640.44	8449.36	6659.38	7956.67	7433.29	796.024	31964.1	2972.45	32112.1	3259.95	1684.16	14398.5	16113.6
M211T390			211.206	390.336			1398.07	1688.58	1639.71	1864.58	986.234	1515.44	339.543	1791.3	2182.38	2037.11	1633.8	1677.36	1864.39	236.877	1553.26	1572.77	2492.44	2304.59	2030.46	1990.7	423.638	5104.28	5331.88	5507.08	16386.8	5207.02	7507.42	4966.02	10030.1	8490.34	8795.51	9437.03	8900.52	9130.71	607.913	9549.63	3106.65	8585.07	4048.73	1413.62	5340.74	3546.94
M212T360_1			211.615	359.55			14391.9	2752.29	15775.5	13764.8	15114.6	12359.8	5423.63	5948.99	5832.24	8096.64	7234.13	4704.16	6363.23	1319.97	9783.08	6310.97	5416.37	11506.5	3078.19	7219.02	3397.69	794.955	2013.52	2926.23	3228.61	7036.09	3199.88	2344.32	13330.6	10457.9	6212.62	13262.2	10422.8	10737.2	2904.73	13538.7	9025.01	14074.6	6155.81	6202	9799.22	3843.06
M212T415			211.633	415.072			7202.27	13493.1	10287.2	13239.2	4516.15	9747.59	3884.52	21829.7	46648	13031.9	35622.6	42290	31884.4	14113.2	26211.6	11875.1	37965	33716.4	36799.6	29313.5	10770.3	7642.32	9220.06	13377.3	7796.18	9905.96	9588.37	2323.35	12520.4	11337.1	16550	8718.72	9836.44	11792.5	3026.76	57772.7	3048.86	76952.9	2610.76	2723.27	28621.7	36010.3
M213T353			212.624	352.6			2478.31	2682.36	16043	5501.78	1474.36	5635.97	6007.04	1666.49	1948.45	3129.41	1982.77	4359.75	2617.37	1123.88	2120.32	2133.18	4263.4	1971.52	2077.24	2513.13	980.492	2526.95	2759.06	7453.05	11229.4	3043.9	5402.47	3839.82	4487.93	4293.69	4307.76	4494.37	7677.9	5052.33	1470.83	5745.76	10856.1	6609.03	7341.04	9753.97	8061.18	2160.18
M213T362_1			212.627	361.893			1373.86	3553.18	3593.14	2838.31	5145.64	3300.83	1367.44	2973.95	2871.15	2548.79	3470.77	2188.39	2810.61	480.069	3284.18	2762.98	3285.04	2494.07	2136.33	2792.52	501.21	5877.77	5025.35	3837.44	7137.51	3778.59	5131.33	1422.78	4765.12	4537.58	4751.69	4490.45	4081.28	4525.22	277.166	1245.95	15359.6	16291.6	1675.78	12239.5	9362.48	7369.17
M213T369			212.641	369.365			2003.75	1084.93	1337.68	1496.69	1342.91	1453.19	341.369	1078.65	639.767	1525.79	1079.8	849.976	1034.8	329.86	1259.3	289.787	1338.3	1004.38	835.772	945.506	417.799	1935.32	2667.1	1791.25	2709.78	2996.02	2419.89	526.085	5248.96	2796.87	4409.03	5019.5	3742.15	4243.3	998.072	10199.5	9722.24	9859.87	7740.49	7891.81	9082.78	1170.47
M213T398_1			212.611	398.346			2425.24	1687.92	2036.89	1951.44	1548	1929.9	339.732	1514.78	2442.52	2236.49	2088.14	3141.08	2284.6	589.921	2096.54	1609.66	3909.9	2385.25	1555.37	2311.34	957.97	1976.35	1358.36	1558.05	1128.62	1212.09	1446.69	337.992	2164.43	1088.94	1245.72	1700.24	685.93	1377.05	570.596	2336.78	8953.39	1093.29	6760.16	8001.36	5429	3506.08
M214T69			214.047	68.8945			1200.92	790.036	518.506	753.656	801.276	812.88	245.661	673.079	732.193	609.28	380.314	821.557	643.285	166.496	762.243	702.788	521.184	767.149	811.579	712.989	113.987	1022.16	367.318	838.11	2398.26	7597.5	2444.67	2977.99	978.17	627.768	1325.96	1054.95	969.882	991.346	249.417	3845.65	4089.25	3166.34	5026.24	4347.76	4095.05	681.124
M216T167			216.064	167.321			2216.94	1828.38	238.108	1660.46	1974.79	1583.74	779.475	4602.48	1363.56	3123.44	4403.99	7401.27	4178.95	2216.64	3444.86	3530.57	2775.4	4039.14	1670.84	3092.16	912.944	2326.8	1886.99	2181.29	2221.3	3191.53	2361.58	491.794	15382.1	16214.5	17648.8	61266.8	11386.9	24379.8	20750.9	12305.5	12491.2	24801.4	6260.77	7246.77	12621.1	7379.27
M216T392			215.637	391.807			2712.94	4539.89	5396	3723.76	3875.78	4049.67	997.022	3032.91	2878.75	2264.27	3605.96	2439.57	2844.29	528.471	3937.6	2855.99	2433.63	2245.28	1575.62	2609.62	874.228	1641.57	1714.4	1858.77	1255	1158.95	1525.74	303.211	1840.32	1390.94	1405.27	1612.42	1407.61	1531.31	195.549	9039.46	784.312	7448.94	895.977	6270.42	4887.82	3823.63
M217T398			217.15	398.255			63147.5	41065.4	37884.3	38468.3	32904.5	42694	11809.1	54479.4	41702.2	45903.4	50452.4	47145.4	47936.5	4815.72	73749.1	32239	45789.3	45703.5	29884.2	45473	17448.8	21790	16164.9	21164.5	6014.31	12795.3	15585.8	6506.72	11647.5	15216.5	9143.49	8590.53	11883	11296.2	2635.87	16573.1	48681.2	15853.2	69390.7	54258.1	40951.2	23821.4
M219T42			218.896	41.54			37181	1622.1	1367.18	1959.16	1521.7	8730.24	15906	334.967	940.781	2115.02	1867.62	1587.92	1369.26	725.549	1433.16	13761.2	1579.15	2081.07	662.567	3903.42	5534.07	2206.09	1106.3	1387.24	1884.76	1593.32	1635.54	427.543	1900.4	1298.77	1515.86	1981.72	445.932	1428.54	616.167	1337.86	1672.87	1038.09	1065.54	350.788	1093.03	487.559
M221T390			221.136	389.88			6214.08	8523.9	7589.57	8052.59	2988.2	6673.67	2233.69	4833.29	13770	3722.33	8661.66	8064.33	7810.31	3933.22	8660.78	4670.22	15543.1	12539.4	17417.4	11766.2	5167.09	19372.5	27748.1	30109.5	25431.3	25155.4	25563.4	3998.46	34038.5	24569.8	29006.7	28473.7	35227.6	30263.3	4361.59	51811.4	50261.9	46605.8	40411.5	3432.1	38504.5	20091.4
M221T403			221.227	402.826			2470.5	5834.24	8426.5	6916.83	5713.53	5872.32	2191.68	4518.1	2419.64	4847.58	4499.5	3274.82	3911.93	1027.25	4352.58	4061.19	3134.04	3557.42	1652.5	3351.55	1058.55	330.928	593.866	311.506	5646.73	362.504	1449.11	2349.29	4006.94	429.785	710.702	906.924	552.219	1321.31	1511.91	1519.45	1304.56	1025.82	1732.37	1946.1	1505.66	359.255
M222T391_1			221.638	391.152			1308.93	1842.74	649.986	1127.37	1110.18	1207.84	430.27	1466.66	3347.88	774.035	635.49	1737.3	1592.27	1084.42	639.162	1256.06	3564.55	3665.16	4077	2640.39	1572.37	4801.83	7839.89	7025.93	5734.35	6676.98	6415.8	1176.62	8666.52	6553.83	7595.72	6982.33	8616.84	7683.05	950.388	12870.9	242.974	11808.9	583.865	246.619	5150.66	6575.06
M223T405			222.658	405.429			4697.95	8461.48	9740.97	8628.16	8561.11	8017.93	1927.13	6025.84	2669.17	5132.8	7388.38	3838.19	5010.87	1840.95	5558.74	6325.56	3191.99	4356.15	1326.56	4151.8	1977.98	2732.08	369.567	492.875	1580.75	403.644	1115.78	1034.48	833.681	2280.56	730.393	640.436	420.543	981.123	742.204	368.622	760.333	884.103	672.883	661.636	669.515	190.333
M223T447_1			222.649	446.752			8868.94	8707.52	8066.94	7019.82	5967.24	7726.09	1222.48	6872.7	6180.41	4659.84	6809.85	4094.33	5723.43	1274.28	11106.2	7585.1	6617.33	8799	3713.32	7564.2	2729.33	5901.94	4396.56	5733.13	3424.38	3339.68	4559.14	1222.97	4599.81	4251.42	3826.03	1859.6	4009.99	3709.37	1073.82	4444.78	5392.91	4922.83	446.315	142.929	3069.95	2557.85
M225T108			224.556	108.123			5924.06	564.88	461.282	568.265	724.796	1648.66	2391.88	442.207	794.586	2830.77	983.361	1749.63	1360.11	951.168	2373.69	1198.49	3428.99	2358.85	1072.81	2086.57	971.476	876.337	605.71	1014.69	291.759	385.472	634.793	309.574	2431.71	1538.43	1657.1	2305.18	744.189	1735.32	677.666	1386.86	1417.27	1517.46	1254.8	1105.25	1336.33	159.654
M225T386			225.186	386.47			1459.88	1547.25	1928.01	2054.95	1523.53	1702.72	269.292	1553.34	1681.93	2620.11	2243.42	2314.92	2082.74	449.836	1848.96	1263.56	2260.56	1745.27	1257.38	1675.15	424.785	3466.3	2680.3	2286.61	6612.09	2548.31	3518.72	1784.27	12040.5	12348.8	11725.5	10173	10718.2	11401.2	920.143	3037.68	1469.69	1932.69	1349.13	1155.13	1788.87	754.501
M225T397			225.138	397.394			44216.7	28903.5	27121.2	35368	22601.8	31642.2	8391.49	32786.6	40148.7	28255.3	38423.5	51510.8	38225	8792.38	40057.7	28252.2	44182.1	59088.3	35207.1	41357.5	11550.2	23938.8	16948.6	24030.8	12547.4	17594.5	19012	4937.6	14202.6	16896.6	15349.6	9114.04	17776.8	14667.9	3397.01	18172.9	26263.7	17845.7	35405.5	33127.3	26163	8169.39
M226T216			226.217	215.811			2901.23	3525.6	3608.61	4429.32	3701.75	3633.3	544.627	435.927	426.523	571.266	512.524	629.543	515.157	87.1388	847.249	432.714	798.039	1734.45	574.207	877.333	507.794	4045.09	4453.51	3614.29	6427.25	8311.9	5370.41	1965.35	6334.43	6452.88	5127.95	6821.02	7852.88	6517.83	980.296	2180.46	1772.56	1249.74	1600.12	1655.17	1691.61	335.587
M226T398			225.631	398.115			7548.96	7861.53	7889.76	7773.07	5426.99	7300.06	1055.59	7201.13	9545.33	4959.77	8749.36	411.84	6173.49	3665.04	9029.64	6261.89	9814.77	8232.89	9633.01	8594.44	1442.98	4239.34	3859.12	5586.86	1744.11	3785.7	3843.03	1379.04	2943.25	3778.8	3634.97	3091.57	4091.86	3508.09	480.287	4426.36	4411.8	3763.85	6733.04	3358.56	4538.72	1307.38
M226T408			226.155	408.126			4895.67	4934.47	3282.37	4459.76	1224.7	3759.4	1566.42	3354.56	8799.61	3014.09	5261.91	6177.61	5321.56	2346.63	2398.61	3538.33	8161.54	7355.32	9352.26	6161.21	3026.82	5565.19	6694.57	7526.21	4412.83	6394.6	6118.68	1183.76	6626.23	5935.91	8030.45	5851.44	5330.2	6354.84	1044.05	8792.03	515.392	9512.69	818.291	644.066	4056.49	4660.08
M227T397			226.656	396.88			7610.16	6689.25	6161.27	6093.59	2927.14	5896.28	1767.14	7107.17	9636.98	5686.63	7314.19	7341.1	7417.21	1417.29	9480.7	6337.75	9092.79	8545.05	8447.18	8380.69	1216.77	5037.07	4728.01	6216.16	3229.19	5020.37	4846.16	1069.14	4051.66	5353.03	4001.91	4176.14	4715.08	4459.56	574.399	5103.73	4379.28	4495.7	5461.06	4714.44	4830.84	447.61
M228T303			228.269	302.845			2503.73	15257.9	6408.23	41227.8	36677.8	20415.1	17615.7	6730.58	4740.32	3857.26	4045.56	9248.85	5724.51	2275.26	5202.6	3970.28	11195	17016.3	1395.03	7755.85	6302.66	9572.62	4217.48	9160.2	6792.06	11908.8	8330.24	2929.15	8686.64	20031.1	34454.7	6678.21	4193.19	14808.8	12545	4369.87	9712.12	10995.6	4426.2	2511.19	6403.01	3715.85
M228T397			227.656	396.759			564.248	961.695	789.489	954.804	736.32	801.311	165.715	707.228	1148.96	381.255	976.3	755.083	793.766	290.961	1410.2	816.393	998.01	1033.66	1415.37	1134.73	266.875	730.269	866.94	926.491	525.517	655.417	740.927	161.354	743.576	637.749	585.526	463.219	734.841	632.982	115.867	877.306	2087.28	536.283	2303.37	2376.06	1636.06	863.382
M228T428			227.647	428.12			4370.51	5779.34	4961.39	5151.91	2503.88	4553.4	1251.16	6381.5	10943.1	5755.44	8367.66	7411.13	7771.76	2033.53	11408.1	7729.61	12406.8	16321.7	13557.7	12284.8	3140.48	4931.15	5093.31	7514.7	1320.77	2843.55	4340.69	2363.83	7430.32	7031.08	9697.56	2988.99	3138.51	6057.29	2916.28	14927.2	1343.52	16879.1	1215.75	734.801	7020.07	8141.56
M229T202			228.58	201.991			2029.43	806.875	799.302	707.367	787.884	1026.17	562.251	1043.05	741.892	2889.15	836.092	1267.93	1355.62	880.861	7337.46	10966	4013.91	11625	1549.25	7098.32	4353.52	691.963	566.629	769.899	2481.94	3717.76	1645.64	1399.45	6454.46	4861.2	5335.53	5062.3	1231.02	4588.9	1975.56	496.478	1142.08	860.283	624.634	1030.52	830.799	270.152
M229T292			229.044	291.817			727.552	769.962	839.379	834.45	640.65	762.399	82.4796	672.405	733.989	623.258	978.185	813.185	764.205	139.097	797.423	394.705	705.035	834.266	780.744	702.435	178.353	5766.98	3340.85	7704.77	1279.41	3091.96	4236.79	2511.36	412.936	315.365	640.134	434.929	303.309	421.335	135.359	4601.39	3289.9	3760.05	4661.45	3820.09	4026.58	589.458
M229T426			228.663	426.288			853.761	1186.61	1082.86	697.463	667.966	897.732	230.519	1809.49	3047.91	1606.66	1908.49	2038.72	2082.26	562.396	2496.75	1324.02	2815.88	4110.38	3664.51	2882.31	1084.13	806.276	897.167	1968.66	566.254	830.63	1013.8	548.24	2788.84	2313.96	3249.68	1004.92	357.768	1943.03	1219.98	4005.68	606.74	4960.15	526.448	684.309	2156.67	2150.94
M231T199_2			231.053	198.979			1104.45	2758	2684.39	537.14	4743.84	2365.56	1646.62	4694.3	3889.6	6308.42	3420.77	4891.62	4640.94	1106.74	8577.34	6273.42	5587.29	10893.5	2254.64	6717.23	3251.52	2508.61	2318.27	2540.98	3856.21	1992.94	2643.4	712.106	10651.4	7705.2	9961.12	7942.99	94158.1	26083.8	38075.8	2550.17	2456.8	1616.84	3755.46	1651.58	2406.17	871.255
M231T55			231.119	54.587			3281.8	6888.81	8650.25	7865.4	9874.86	7312.23	2504.35	4164	5053.98	7448.83	12154.6	4672.64	6698.81	3300.17	7970.35	3269.19	16744.4	3539.59	52057.3	16716.2	20493.5	2092.84	3069.59	4388.3	7187.73	5102.51	4368.2	1959.15	4461.98	1592.38	5728.61	1739.37	3939.21	3492.31	1790.5	3727.19	2920.13	1956.85	3911.53	3547.85	3212.71	795.004
M232T360			231.637	359.776			535.847	536.454	784.458	699.92	626.717	636.679	107.412	479.165	573.369	801.139	484.791	620.36	591.765	131.45	446.2	515.84	452.769	532.711	344.828	458.469	73.9943	603.053	613.258	917.264	446.456	298.452	575.697	230.432	930.249	1013.76	1267.13	701.923	893.217	961.256	205.645	8361.68	8340.91	7343.69	11091.2	9027.62	8833.03	1398.2
M232T414			232.147	414.296			1889.6	2864.3	2553.49	3328.47	1188.27	2364.83	840.208	5613.04	11309.3	3077.32	8972.21	9491.54	7692.69	3300.74	5666.41	3286.05	8701.92	6325.43	8596.17	6515.2	2252.56	2022.77	2253.22	3019.91	1624.68	2153.79	2214.87	509.541	3406.25	3052.4	3752.88	2247.39	1777.39	2847.26	818.41	11100.5	887.978	14490.8	1124.1	636.468	5647.97	6636.35
M235T101			235.191	100.611			632.595	917.526	631.28	821.014	755.16	751.515	123.492	904.566	947.173	716.912	714.114	931.744	842.902	117.29	883.988	785.653	665.511	725.413	680.807	748.274	89.0783	3620.83	1911.29	3087.66	9373.64	912.203	3781.13	3298.1	3893.19	5084.12	22507.8	3084.34	1483.41	7210.56	8650.97	5796.55	6499.69	2528.01	1473.49	1606.84	3580.92	2391.4
M236T220			235.561	220.038			1749.47	1695.05	1271.72	1309.35	1014.16	1407.95	309.198	696.365	344.261	815.368	720.29	539.829	623.223	184.706	792.759	1489.67	1048.08	868.343	615.566	962.884	332.892	704.235	753.952	577.994	2316.95	8717.94	2614.21	3485.64	2309.96	1786.33	2399.31	3578.26	1580.25	2330.82	777.986	655.809	753.47	584.641	616.726	679.266	657.982	64.5302
M237T421			237.222	420.699			19107.2	19877.4	18065.9	16786.2	20705.6	18908.5	1534.77	16633.6	17812.1	15811.2	15091.4	13941.6	15858	1473.33	21997	22254.8	24250.7	20775.1	19900.1	21835.6	1651.16	36323.7	24586.6	32717.7	20058	21262.9	26989.8	7186	32000	33264.4	38827	26464	24718.9	31054.9	5643.59	63086.4	11504.3	93381.5	12909.9	12663.6	38709.2	37641
M237T62			237.089	62.445			35464.6	2517.27	12578.9	13496.4	8796.66	14570.8	12452.9	6670.32	5023.59	5886.68	4055.36	8277.42	5982.67	1611.08	19896.4	6805.45	3978.77	11045.3	3081.66	8961.51	6854.96	14625.2	8327.1	15967.9	10168.9	11929.4	12203.7	3133.54	6583.86	5471.35	6878.75	8073.43	3407.32	6082.94	1759.21	3933.28	4008.12	3785.78	3821.33	3449.79	3799.66	214.7
M240T384			240.233	383.997			909.198	846.092	570.272	1781.45	1068.76	1035.15	454.371	993.9	869.885	1981.67	772.059	2689.31	1461.36	839.953	974.956	1390.35	2377.58	2455.67	822.079	1604.13	770.797	9654.95	13341.7	7699.94	15649.5	4708.42	10210.9	4366.66	1049.8	1963.82	1755.96	4291.97	12115	4235.32	4570.22	13009.9	32451.3	17819	2162.11	21582.7	17405	11131.9
M242T95			242.079	94.603			13163.9	9606.1	10488	10861.5	10837.6	10991.4	1316.51	16867.6	17013.2	29184.7	18000.7	20472.9	20307.8	5168.14	29909	24837.4	31265.3	12571.1	12953.4	22307.3	9037.74	12792.7	6463.47	11434.8	37099.7	17752.8	17108.7	11876.4	14841.9	12222.8	12353.5	21872.2	11300.3	14518.1	4315.55	5417.82	5476.73	6080.53	4569.18	2572.9	4823.43	1368.39
M243T224			243.244	224.069			1050.18	843.633	1221.14	2307.42	10259.7	3136.41	4021.98	2058.33	1181.88	320.117	1789.63	2165.75	1503.14	763.565	3588.19	981.521	2419.54	2308.81	1201.29	2099.87	1051.08	1243.91	833.844	1320.89	1764.09	1445.57	1321.66	337.31	1935.75	3977.85	1807.98	5630.61	2171.5	3104.74	1662.93	805.103	5166.57	14601	3116.32	3179.91	5373.77	5384.37
M243T74			243.075	74.001			7804.67	2370.85	4584.37	3666.49	8798.38	5444.95	2746.24	12191	10862.9	13068.7	8439.83	13412.1	11594.9	2019.9	20382.8	13060.3	17408.8	15534.5	11053.7	15488	3647.19	32336.4	11873.4	14969.4	36812.9	59163.4	31031.1	19049.6	55242	60154.7	53202.2	65825.1	32133.8	53311.6	12802.9	34505	32786.6	28896.3	27169.4	19559.4	28583.3	5836.58
M244T446			244.192	445.661			17117.3	3735.72	6647.18	30973.6	1423.06	11979.4	12196.4	1151.28	979.402	798.387	718.846	1143.78	958.34	196.852	625.014	795.024	605.744	1003.3	494.318	704.681	198.573	656.267	936.431	2013.72	509.876	691.726	961.605	607.806	402.453	596.715	480.061	355.219	365.002	439.89	100.482	440.027	264.39	396.056	480.326	424.222	401.004	82.2217
M245T101_1			245.244	100.605			418.222	42577.1	493.617	441.224	586.976	8903.43	18824.3	760.521	1038.47	698.838	762.064	642.865	780.552	152.397	897.252	763.625	727.277	736.736	573.146	739.607	115.432	1921.84	1490.13	726.394	641.556	2008.08	1357.6	646.181	1826.78	1706.33	1927.51	1677.66	1517.89	1731.23	155.451	1989.8	707.6	1830.4	2074.36	1829.68	1686.37	557.198
M245T136			244.566	136.202			4629.65	1944.77	1671.84	1590.22	2655.61	2498.42	1263.08	11618.7	9164.89	13433	6608.62	10613.1	10287.7	2577.13	20336	13119.9	17167	14093	3651.55	13673.5	6275.25	1283.06	956.569	1411.04	2876.42	6726.54	2650.73	2394.82	13938.1	9834.24	11751.8	13953	3453.94	10586.2	4340.62	1620.21	1556.83	1387.21	1736.75	1329.99	1526.2	167.278
M246T48			246.153	47.896			2560.98	6705.64	9616.86	9166.7	8299.45	7269.93	2857.37	10973.7	9181.06	16134.5	12445.2	10797.8	11906.5	2631.23	14920.6	19156	18406.6	16123.4	26898.3	19101	4680.43	5162.17	6789.06	3520.03	1642.45	8153.29	5053.4	2579.7	7258.79	9756.27	7148.77	5885.99	7682.95	7546.55	1405.34	552.804	3112.9	4107.03	6871.43	4174.08	3763.65	2273.63
M250T261			250.113	261.055			10031.4	9175.25	9816.09	9235.33	13617.5	10375.1	1849.49	7888.45	9115.83	10574	9051.95	13969.1	10119.9	2353.23	8681.69	3655.76	14879.6	9339.28	11255.6	9562.39	4088.2	29234.9	20899.9	24172.1	28389	28321.8	26203.5	3560.45	29905.8	27348.2	28705.6	28819.5	20899.5	27135.7	3602.36	21267.1	21345.8	29945.7	31871.7	20542	24994.5	5450.72
M252T54			252.105	53.655			9037.63	15683.3	15976.8	15455.6	16349.6	14500.6	3072.17	7751.29	6815.53	13730.2	11135.2	10302	9946.84	2760.32	10395.2	10314.4	10464.8	10417	10349.5	10388.2	58.4717	35061.9	20454.1	26108.7	38156.1	29631.6	29882.5	7044.09	39106.9	35683	34745.3	33901.2	20787.2	32844.7	7024.65	15882	22098.4	19488	22247.5	22074	20358	2753.88
M253T45_2			253.113	45.469			7749.39	8745.68	10966.1	12206.1	6684.3	9270.32	2278.74	8476.73	6759.8	9790.99	8416.15	7885.54	8265.84	1096.12	8550.83	6674.16	9703.68	7214.94	9390.65	8306.85	1326.95	22685.8	14131.2	24954	24759.5	23264.8	21959.1	4481.08	26149.4	23638.9	27004.7	24119.1	20452.5	24272.9	2549.75	13913.2	16414.6	15589.6	21938.5	19126.6	17396.5	3161.69
M254T263			254.249	262.697			2713.35	3322.14	3779.32	3452.89	4153.18	3484.17	537.607	555.291	764.33	924.022	870.313	1178.26	858.443	227.752	750.884	929.973	837.251	1331.7	567.077	883.377	284.119	11701.1	6358.11	10199.7	19361.2	11933.6	11910.7	4725.29	16203.2	17604.4	12250	18170.7	11082.9	15062.2	3208.22	5978.19	6931.55	6971.31	4373.94	4361.69	5723.34	1299.72
M254T394			254.249	394.38			12389.3	18687.8	8118.89	10515.4	13724.1	12687.1	3960.96	7078.92	4538.38	14193.2	7479.82	8103.95	8278.86	3573.51	6231.5	9032.6	19650.9	6893.32	14313.9	11224.4	5679.84	14290.9	5749.12	12786.9	12182.1	11572.3	11316.3	3271.84	11328.2	22295.8	12634.1	19966.8	25681.1	18381.2	6202.84	7359.11	2258.45	7036.03	1379.58	2065.92	4019.82	2921.45
M257T101			257.173	101.014			2348.3	3515.23	3203.3	2813.29	2147.37	2805.5	571.006	4236.52	3770.65	2447.39	3422.77	3026.93	3380.85	686.014	3465.5	3842.29	2228.63	2605.29	2266.34	2881.61	732.313	17087.5	11915.9	18353.5	44281.1	3121.73	18951.9	15374.5	19562.8	21303.1	89686.4	11519.5	9358.82	30286.1	33594	25306	33518.8	12585.2	7301.8	9069.98	17556.4	11366
M257T162			257.055	162.072			2462.01	2565.17	753.395	2171.74	2232.98	2037.06	735.495	1452.98	2640.45	5318.14	758.522	1173.89	2268.8	1842.68	3450.02	2373.1	3108.68	8847.7	240.218	3603.94	3185.73	2555.19	2875.13	2668.77	2919.57	2326.74	2669.08	242.573	5591.77	42736.7	5540.26	7018.18	8136.02	13804.6	16209.6	2911.34	2716.01	5466.4	3387.23	3603.2	3616.83	1093.5
M260T305			260.14	304.868			859.222	1025.86	2285.2	2446.69	775.191	1478.43	817.186	1191.13	677.482	3684.62	329.203	1024.24	1381.34	1329.59	6269.15	6656.98	4606.54	8299.49	2538.27	5674.09	2190.09	1028.45	1949.53	1324.53	982.501	1158.76	1288.75	392.542	6628.76	23872.8	6438.78	6822.03	3674.1	9487.3	8144.09	3578.84	3831.72	4045.12	4523.52	3613.44	3918.53	386.667
M262T54			262.121	54.1515			1934.62	819.031	11805	1034.55	1917.01	3502.04	4668.92	1512.78	12498.8	1683.38	978.495	845.543	3503.8	5040.62	1751.16	3128.46	16832.3	2207.46	1112.43	5006.37	6651.56	48120.1	34797.4	4662.72	4668.1	4946.39	19439	20646.1	3210.15	4256.69	5132.7	4147.36	4403.67	4230.11	687.869	3725.49	4375.98	4668.32	5921.9	5017.01	4741.74	812.477
M265T235			265.097	234.595			2122.5	1473.41	1370.51	1498.4	510.54	1395.07	576.403	1272.29	3528.74	1538.57	915.537	1788.04	1808.64	1014.57	1495.76	1682.51	2787.15	1737.19	2627.4	2066	594.89	3211.89	3801.97	4397.21	26924.5	7681.72	9203.46	10056.4	2743.38	5986.68	2941.61	4020.67	10473.2	5233.11	3199.47	1029.69	1939.36	1885.05	1775.32	1730.04	1671.89	368.605
M265T39_3			264.967	39.359			988.438	140591	108681	501.373	1341.75	50420.6	68682.5	60525.5	63721.8	95097.4	87471.8	960.754	61555.4	36993.9	116404	1346.19	118816	148329	2319.96	77443.1	70158.3	3294.77	3705.76	1072.72	136612	5764.68	30090.1	59571.1	5376.15	5175.35	5087.55	4794.75	4737.62	5034.28	266.924	7646.7	5053.07	6796.58	5863.77	7066.54	6485.33	1027.27
M265T446			265.253	446.446			12695.7	14660.7	14712.8	14556.5	11970	13719.1	1292.5	11520.2	10729.9	9108.92	11324.2	8888.79	10314.4	1238.15	16414.7	13853.9	11529.7	18177.4	7605.24	13516.2	4157.17	18044.9	12899	14224.2	13662.7	13961.9	14558.5	2011.17	14393.1	11841.3	15184.5	16828.7	18193.2	15288.2	2424.11	13741.8	1893.23	16276.3	1278.18	1013.09	6840.52	7517.24
M266T272			266.249	272.244			3585.22	4756.35	5153.33	4865.5	5552.62	4782.61	736.826	625.986	592.843	450.589	498.182	4306	1294.72	1684.84	492.906	3121.46	4504.99	2564.2	4127.47	2962.21	1582.66	12441.2	7541.78	9569.82	79220.5	8862.24	23527.1	31185.1	38260.4	48003.1	33557.4	38049.2	31516.7	37877.4	6360.58	5733.13	4646.9	3310.65	4447.93	4404.36	4508.59	861.43
M266T75_2			266.046	75.438			1277	1976.1	2603.78	1532	1470.51	1771.88	530.811	1506.26	1685.06	1640.63	1757.24	1672.29	1652.3	92.1283	1451.41	1044.76	1356.35	1976.31	1600.34	1485.84	341.386	6841.11	4096.79	4921.14	11142.5	3123.95	6025.1	3170.47	3602.92	4241.44	3809.69	3084.29	3585.77	3664.82	418.502	2052.48	1687.08	1643.27	1698.98	1312.82	1678.93	262.353
M270T312			270.316	311.594			5595.25	1629.28	560.976	2013.05	2281.42	2416	1893.95	1205.11	1196.08	414.228	781.107	1697.45	1058.8	484.952	436.581	1132.89	1984.69	632.29	659.274	969.145	622.749	34773.2	41071.6	33782.5	691.031	514.757	22166.6	19882.5	615.126	479.353	598.396	813.672	725.438	646.397	127.881	477.128	859.683	453.06	742.518	550.851	616.648	177.106
M271T73			271.07	73.3445			158897	6081.81	7023.76	5711.4	8645.4	37271.9	68000	24982.5	20312.7	13328.8	12992.7	11807.7	16684.9	5716.08	27968.4	11163.6	12590.5	9944.02	4926.11	13318.5	8683.48	5952.68	3678.22	5729.19	7880.86	5760.16	5800.22	1488.44	3922.17	3574.6	4008.61	3652.94	3110.61	3653.79	353.287	4084.99	3220.79	4240.61	3543.58	3391.95	3696.38	444.245
M275T231			275.101	231.085			1157.55	1192.26	1200.78	1487.71	1506.29	1308.92	172.581	3191.43	2455.46	2657.88	1100.64	5886.18	3058.32	1758.61	5613.48	3102.24	7004.91	3570.66	1941.88	4246.63	2034.38	26134.9	5463.18	10796.7	31015.6	10906.9	16863.4	11051	37274.7	22149.9	39510	47556.5	10655.5	31429.3	14808.9	19749.3	22436.3	16812.4	15530.3	15843.1	18074.3	2952.77
M277T241			277.096	241.347			3840.45	2275.11	2050.76	1752.13	1982.7	2380.23	837.316	3142.51	1934.23	1960.35	1774.95	2299.03	2222.21	548.726	12913.3	8824.65	11010.9	15737.1	7127.4	11122.7	3382.13	8624.58	5257.92	7143.86	12799.1	7275.47	8220.19	2826.48	34941.5	23949.6	33010.3	37698	11643.2	28248.5	10618.2	15910.6	16527.3	13277.3	16191.6	13928.6	15167.1	1462.68
M277T336			277.047	335.817			431.562	418.208	624.994	487.345	509.752	494.372	82.3013	912.414	640.415	1634.04	1068.99	1297.37	1110.64	377.806	518.296	989.98	828.12	647.533	854.12	767.61	185.182	811.805	1169.16	762.264	1737.93	3371.61	1570.55	1079.58	676.247	987.82	594.864	830.922	985.023	814.975	178.003	211.944	229.497	187.805	247.247	219.202	219.139	21.971
M277T396_2			277.265	396.037			292.666	687.226	689.589	1425.68	303.697	679.772	460.384	932.468	624.135	635.272	963.85	1757.77	982.698	461.758	542.362	478.134	553.069	1258.01	535.377	673.391	328.101	3294.66	7636.24	3907.01	5782.72	1969.4	4518.01	2218.57	1259.56	1247.98	2960.4	3200.08	7764.58	3286.52	2666.04	6702.8	12004.7	11500.9	4046.12	10452.3	8941.37	3434.86
M278T360_1			277.663	360.122			26107.8	19898.9	27237.7	25146.6	28786.8	25435.6	3378.9	15609.7	7384.86	20036.1	19551.4	15429.8	15602.4	5069.75	29973.9	10469.1	21452.9	15524.1	7345.91	16953.2	9030.11	26593.2	14311.6	16540	7645	30923.2	19202.6	9441.69	6947.74	18185.9	10657.4	12961.6	24007.6	14552	6673.36	6033.84	3363.53	4759.01	5438.59	2260.42	4371.08	1543.12
M279T301			279.094	300.883			900.06	1208.51	1066.89	1156.71	1351.06	1136.65	167.615	1009.25	1022.97	1063.23	45682.4	1081.31	9971.83	19962.8	877.642	906.766	1149.01	1191.49	767.451	978.472	183.234	2971.05	1502.49	7122.5	1378.53	1201.33	2835.18	2498.34	1186.9	1087.97	500.779	1555.46	1136.74	1093.57	379.259	1254.84	884.253	517.213	1051.17	1382.67	1018.03	338.693
M279T40			279.135	39.821			2593.28	4868.42	5981.13	7077.03	6840.18	5472.01	1827.47	6720.6	6249.9	11051.4	9480.27	10034.1	8707.26	2111.79	8938.22	13113.3	13029	13426.6	23645.8	14430.6	5472.51	4775.6	3464.53	3780.42	3170.46	6387.07	4315.62	1306.2	8409.17	8078.18	9246.82	6498.46	6653.3	7777.19	1177.72	7360.37	5645.11	5709.01	6425.1	341.02	5096.12	2746.86
M280T344			280.226	343.904			2347.75	757.845	437.532	873.599	875.947	1058.54	742.577	346.963	2205.42	1702.25	1442.07	1164.52	1372.25	689.622	447.356	2845.63	1672.49	2309.27	1363.56	1727.66	916.912	2249.37	1821.36	7034.42	12510.4	1117.64	4946.64	4828.91	754.707	648.067	864.411	2656.37	3340.6	1652.83	1254.33	2443.02	1674.6	2299.32	2408.58	32053.4	8175.79	13351.6
M281T119			281.11	119.16			14160.6	1010.18	1192.9	1765.25	2073.82	4040.56	5673.48	1979.47	1581.2	1470.57	1285.69	1518.36	1567.06	255.506	2353.99	1468.59	1710.64	1531.67	1129.86	1638.95	451.7	11073.4	7084.78	9512.57	12398.8	8153.99	9644.71	2145.88	6493.26	7113.97	8358.7	5817.6	4898.07	6536.32	1309.3	7340.57	7867.66	6777.16	8294.27	7339.27	7523.78	578.135
M281T366			281.134	365.515			2937.55	2438.85	3247.5	2042.22	1864.2	2506.06	584.715	2185.48	1662.46	1741.55	3391.39	2501.86	2296.55	700.582	2349.06	1804.52	3676.63	2654.63	3068.56	2710.68	709.96	13110	11169.7	10606.7	4900.79	11098.2	10177.1	3100.8	7026.47	9314.45	9877.39	8469.94	7274.73	8392.6	1242.61	3371.32	3249.11	2294.91	4637.51	1718.81	3054.33	1118.62
M281T403			281.248	403.272			17765.7	36296.7	50340.8	42348.1	34131.5	36176.6	12061	25531.7	15201.6	29091.1	27463.5	34419.9	26341.5	7050.41	26792.2	25640.8	20253.7	22966.8	10777.6	21286.2	6395.32	50554.4	13982.7	16353	38779.2	7678.94	25469.7	18289.1	25996.8	41510.8	32811	18581.5	20474.5	27874.9	9420.22	11700.6	2876.65	5243.28	2951.15	2826.83	5119.69	3818.19
M282T294			282.28	293.625			1247.29	1185.96	1830.98	1743.95	2249.41	1651.52	441.124	474.635	340.074	414.976	400.418	569.966	440.014	86.9896	731.406	431.161	712.01	1118.6	388.382	676.312	292.803	1111.16	751.996	1687.39	9825.16	1055.25	2886.19	3893.72	6966.32	8847.46	6772.78	6263.57	7938.16	7357.66	1030.62	3200.61	3428.46	2831.91	2365.21	1813.77	2727.99	650.431
M283T273			283.275	272.738			1112.27	546.355	1433.91	608.08	6806.05	2101.33	2655.45	2303.46	752.149	786.272	501.841	2732.36	1415.22	1023.88	3202.26	931.836	1665.98	1739.52	439.191	1595.76	1047.01	967.996	420.095	1592.12	919.359	683.676	916.649	435.817	1699.77	2579.24	4694.11	2486.38	207.998	2333.5	1626.01	993.252	13562.7	8093.65	1513.65	723.114	4977.27	5687.43
M283T369			283.226	368.532			8348.63	15857.5	5853.96	5242.92	7908.51	8642.3	4243.06	6328.32	5966.62	6298.19	5433.93	7355.45	6276.5	702.357	4683.23	5925.92	7082.08	5648.65	4086.81	5485.34	1158.62	17485	19205	14841.2	18133.1	30772.9	20087.4	6186.14	23730.9	16880.3	25596.1	27693.6	26709.5	24122.1	4307.54	59089.9	36698	58345.9	41539.3	48278.7	48790.4	9955.58
M283T446			283.264	446.245			88155.1	97247.6	101867	85569.6	78856.1	90339.1	9219.55	77436.8	65238.1	66189.5	74495.2	52710.4	67214	9654.4	112331	92667	81829.5	110209	45802.1	88567.8	27037.8	139477	85942.2	96352.4	99846.5	97917.1	103907	20599.5	104580	80379.2	102250	125981	135043	109647	21498.7	89337.4	129447	109585	11857.9	3154.76	68676.3	57694.9
M284T387			284.261	386.609			1583.47	2108.14	2835.2	14536.3	9125.32	6037.69	5641.3	2440.21	342.251	1757.7	1263.74	4299.81	2020.74	1485.74	2732.94	1856.92	3327.63	4960.97	1667.01	2909.09	1329.12	1761.01	1092.55	1531.39	1524.9	2941.37	1770.24	697.877	6452.03	20028.8	31633.7	5491.44	3573.8	13435.9	12080.7	3341.85	27157.9	23249.8	4318.71	2022.34	12018.1	12143.3
M286T378			286.275	378.023			596.428	948.278	1342.35	3038.33	1759.78	1537.03	945.089	621.336	551.255	649.042	1303.26	1823.35	989.649	556.163	1577.88	719.502	1089.2	1135.54	616.691	1027.76	381.452	2543.47	1669.46	5923.6	19869.7	2223.25	6445.89	7686.75	2380.82	981.41	2351.03	720.931	837.437	1454.33	837.338	760.984	1621.81	1946.34	831.004	17769.5	4585.93	7387.32
M286T42_2			286.141	42.3825			2263.62	20942.3	27216.3	25656.6	22081.7	19632.1	10039.9	15114.1	13977.6	23437.6	20103.2	21246.6	18775.8	4062.95	9239.81	17373.2	15718.9	15330	34022.2	18336.8	9295.27	18723.3	16732.4	12718.7	10455.5	25012.4	16728.5	5657.57	13733	13370.7	11267.4	12896.3	15938.7	13441.2	1684.52	8645.6	7790.93	2377.47	9380.57	9287.74	7496.46	2931.29
M287T103			287.065	103.122			3428.73	1887.97	2135.69	2735.87	2399.77	2517.61	598.743	776.8	2228.92	2557.19	660.441	2655.79	1775.83	978.811	3784.18	2842.5	2871.57	1887.62	2320.15	2741.2	710.797	8003.56	4146.3	7668.83	1076.41	320.531	4243.13	3581.22	10965.1	25425.6	10443.4	15437.6	10250.7	14504.5	6466.38	4794.9	5761.07	5059.27	5615.2	4919.51	5229.99	431.649
M287T378			286.66	378.125			3176.09	4543.86	6744.35	5677.87	4730.4	4974.51	1332.89	3582.38	2413.65	4618.62	3420.02	3216.27	3450.19	792.585	6473.25	1920.13	5091.72	2046.68	1933.51	3493.06	2146.83	5306.88	3499.98	2715.38	1053.25	3354.2	3185.94	1532.57	1048.5	1239.61	1044.27	1153.9	1887.2	1274.7	351.869	1037.2	458.387	932.031	463.91	481.941	674.693	285.483
M287T81			287.11	80.517			1864.93	1494.65	2017.67	1908.51	2140.32	1885.22	242.962	744.59	1971.36	1186.07	1798.8	2058.73	1551.91	565.544	1821.74	2174.73	2001.68	769.287	1717.08	1696.9	547.191	2540.71	4481.62	3854.72	4432.01	3238.94	3709.6	825.647	15638.7	15228.7	13214.3	16263.8	4728.49	13014.8	4770.88	27453.3	29679.7	32250.3	31074	24421.9	28975.8	3109.51
M289T237			289.116	236.612			14496.6	1178.95	1274.94	2117.2	1712.6	4156.07	5792.64	3083.84	2591.61	1589.58	1525.47	2355.1	2229.12	667.448	9503.84	4219.55	5334.99	6860.63	1584.07	5500.62	2953.11	5339.27	383.986	2752.7	16340.2	5253.28	6013.89	6123.67	27645.8	17929.5	27191.3	35363.7	7463.62	23118.8	10712.5	6444.67	9092.73	5956.36	7052.47	5063.77	6722	1511.82
M289T270_2			289.059	270.486			1095.58	1252.74	1232.8	1980.09	1527.76	1417.8	351.271	1196.51	1205.35	1510.2	1389.62	3149.68	1690.27	826.383	746.302	680.46	58257	1458.31	1015.85	12431.6	25619	2201.38	4499	1871.84	1670.31	2117.4	2471.98	1152.24	11365.6	8632.03	9208.26	13410.7	7239.08	9971.14	2429.74	1466.45	2091.15	1035.25	1637.27	1995.09	1645.04	425.834
M291T231			291.015	230.581			698.788	623.693	730.265	605.815	654.619	662.636	51.6966	6103.05	2048.37	604.558	753.367	10233.3	3948.53	4157.58	716.532	766.656	889.307	2139.52	575.769	1017.56	637.182	596.046	666.001	811.268	617.111	585.11	655.107	92.6503	12209	581.785	11390.1	23791.8	477.64	9690.05	9694.36	3958.62	4915.03	6357.13	3046.07	2857.96	4226.96	1444.97
M291T73			291.029	72.953			6747.57	3167.44	3354.98	2017.56	2325.48	3522.61	1887.65	16021.8	15770	12805.2	13041.8	15386.1	14605	1553.84	24834.9	17592.3	14611.1	17389.7	11044.1	17094.4	5075.01	835.07	781.759	894.461	861.142	1627.48	999.983	353.195	6709.39	6622.89	7723.27	7872.97	7451.33	7275.97	577.661	2647.39	2860.39	2696.05	2182.7	2257.26	2528.76	293.901
M292T225			292.109	224.589			862.818	2252.71	809.949	1072.54	1213.88	1242.38	587.683	1210.51	933.977	1899.5	1228.68	790.155	1212.56	426.671	2938.74	2182.78	3564.04	6822.76	2974.23	3696.51	1815.1	2638.84	1418.15	3482.84	3124.45	3129.98	2758.85	807.379	15821.8	11321	17308.4	16013.6	5655.39	13224	4798.89	6545.5	7879.33	6730.19	7707.98	7540.19	7280.64	602.464
M292T386			291.679	386.443			2836.29	3499.73	4616.86	4287.75	2055.53	3459.23	1047.21	3058.71	1733.22	3700.24	2797.14	2696.46	2797.16	711.7	6012.53	2297.65	3035.89	2583.99	1179.87	3021.99	1806.48	4024.96	2021.55	2267.77	1791.89	2583.05	2537.84	881.688	1196.25	1685.27	706.515	1671.38	1645.33	1380.95	428.903	585.611	852.467	611.908	1273.4	644.863	793.649	288.125
M293T241_2			293.137	241.437			4755.44	4242.77	4993.13	8220.52	5666.7	5575.71	1564.63	3625.32	7853.75	3677.2	2298.69	5308.29	4552.65	2131.6	2667.1	2997.24	5396.17	4036.25	2990.41	3617.44	1120.3	15453.7	8871.13	11362.3	22772.4	13045.2	14300.9	5310.13	14866.3	25575	21523.4	24979.8	10725.1	19533.9	6509.47	10358.7	8755.62	10869.5	7265.98	5134.35	8476.84	2344.28
M293T366			292.641	366.474			5944.63	15326.1	19195.8	20664.1	13541.2	14934.4	5785.74	9003.23	16466.6	6417.57	17702.9	13791.4	12676.3	4835.79	15269	8024.47	20390.7	7173.92	15490.6	13269.7	5574.71	76697.6	65563.8	63421.5	23632.5	63457.8	58554.6	20282.9	43909.1	54830.7	49907.8	42492.7	29127.4	44053.5	9691.05	16939.4	13559.6	10542.5	21677.6	13601.5	15264.1	4239.79
M294T114			294.168	114.162			690.266	670.72	591.982	745.096	780.518	695.716	72.5345	574.844	589.985	660.066	564.298	676.975	613.234	51.6364	513.106	510.621	733.034	715.594	575.076	609.486	108.132	1058.21	862.614	821.137	1251.52	3169.17	1432.53	985.826	1037.99	831.814	1034.43	1005.3	709.006	923.707	147.069	13138	12808	11648.8	12498.3	11970.4	12412.7	605.963
M294T240			294.207	240.029			15399.5	5354.95	6002.79	5919.03	5836.41	7702.53	4310.05	4024.83	2417.61	3259.28	3064.42	4082.67	3369.76	698.103	5044.18	3841.75	4860.22	7110.31	2953.53	4762	1558.95	36153.7	18323	29152.8	33044.9	38862.7	31107.4	8009.76	28226.8	19062	27428.3	30847.7	21174.7	25347.9	4994.8	19451.9	14909.2	14573.7	12954.2	16631.4	15704.1	2468.67
M294T299			294.28	299.385			1508.74	1560.99	1603.82	1410.75	1732.96	1563.45	119.038	504.398	396.525	440.536	326.325	437.774	421.112	65.5374	496.736	1025.21	476.602	1064.07	422.35	696.993	318.816	719.125	1036.03	595.889	31850.8	1473.34	7135.05	13820.7	17477.3	20623.7	18595.9	16900.7	19283.6	18576.2	1475.43	3132.59	2689.28	2421.93	2398.87	2493.61	2627.25	304.707
M296T452			296.296	452.454			1328.32	993.767	5251.82	14316.9	7189.84	5816.12	5428.26	4801.68	5424.71	1645.19	2237.6	10236.9	4869.22	3407.53	8386.24	1258.6	3556.49	58401.6	506.032	14421.8	24777.1	1281.39	764.93	1355.46	1132.14	777.781	1062.34	277.578	546.073	560.475	661.588	721.565	734.847	644.91	88.2338	550.28	319.953	561.747	515.654	324.137	454.354	121.976
M297T458			297.279	458.287			6716.65	7290.21	7352.95	6701.86	5987.33	6809.8	552.855	3121.32	3996.09	2423.36	2763.74	3026.89	3066.28	586.091	3985.78	3023.34	3943.71	4886.89	1747.08	3517.36	1188.99	12089.8	8406.85	6567.11	15166.2	16909	11827.8	4370.64	5517.43	4678.89	5870.22	11719.4	16835.7	8924.33	5228.79	6107.56	700.592	2538.03	790.975	604.757	2148.38	2353.1
M297T485			297.279	485.128			5909.45	5065.77	4617.43	5757.62	3606.58	4991.37	934.481	5370.9	15404.7	7698.65	9385.19	6663.19	8904.53	3919.42	5649.77	5131.46	10909	9299.47	13676.1	8933.15	3597.45	23541.1	30549.4	28237.9	17025.3	16684.9	23207.7	6326.2	17740.7	24253.2	19041.3	22025.3	46006	25813.3	11571	12045	11762.5	16907.2	11002	14158.7	13175.1	2392.25
M298T454			298.311	454.216			12206.9	12607.3	22328.8	46154.6	16632.2	21986	14111.1	25282.7	11464.2	1126.59	12368.6	112261	32500.7	45403.9	10552.9	9781.76	6028.66	39768	1650.95	13556.5	15072.5	2685.75	1121.86	4811.17	3857.03	1609.01	2816.96	1533.65	995.173	880.508	2035.45	2913.22	3426.7	2050.21	1131.48	1484.61	1616.59	1144.88	871.922	915.146	1206.63	333.971
M299T364			299.166	363.995			1495.8	1434.77	1634.15	1709.99	1522.66	1559.47	110.899	1474.77	1583.68	1401.78	1353.5	1756.15	1513.98	160.769	1339.31	1502.58	1161.46	2143.1	958.221	1420.93	451.741	1650.58	2072.45	2495.22	3674.46	1943.97	2367.34	791.338	5334.9	25614.4	5712.59	8562.61	3307.96	9706.49	9088.08	1564.58	1935.17	2515.67	2260.98	2686.77	2192.63	451.092
M299T396			299.248	395.919			900.946	723.85	807.821	1271.58	528.628	846.565	274.427	963.136	984.005	1506.48	1057.1	1731.1	1248.36	349.099	565.904	588.915	1641.6	1876.66	655.537	1065.72	639.271	4517.73	17078.2	10550.5	4811.26	3397.18	8070.97	5752.7	2085.98	1349.85	1324.35	2949.99	15571.2	4656.26	6137.72	9081.93	522.754	16603.4	491.788	560.295	5452.03	7251.9
M301T423			301.274	422.709			2345.56	4970.62	8426.97	6262.72	5879.76	5577.13	2207.61	3084.33	2025.81	3014	3368.92	2475.25	2793.66	537.342	4497.11	3563.84	2552.42	3701.64	1258.35	3114.67	1246.94	2367.95	529.858	975.137	685.358	828.63	1077.39	740.161	800.158	1996.03	2368.19	475.962	531.474	1234.36	883.667	769.14	1179.43	671.41	1682.08	2051.53	1270.72	591.179
M303T304			303.132	304.356			4937.23	1700.77	1392.17	2166.35	3200.08	2679.32	1435.86	4346.93	3761.39	4181.08	4528.58	4655.76	4294.75	348.252	8831.04	5820.3	7236.34	6853.33	4898.91	6727.98	1488.82	12968.3	1537.61	4482.33	15324.4	6124.51	8087.43	5829.81	28665.2	19382.3	28815.6	50109.7	8771.29	27148.8	15250.7	9602.24	10420.8	6684.39	8087.55	7517.38	8462.48	1527.22
M303T97			303.131	97.131			27183.9	3499.95	3974.18	5087.66	5770.3	9103.2	10147	1789.6	6658.38	3358.88	6743.99	10039.7	5718.1	3225.35	3189.15	7030.63	3507.91	2995.94	2663.53	3877.43	1789.1	16091.8	10218.8	12828.6	17229.6	17000.9	14673.9	3050	14592.9	14697.2	12994.1	17581.8	14559	14885	1663.98	8721.61	10347	7333.22	8653.9	7826.21	8576.4	1147.88
M304T427			304.294	426.659			1830.39	3305.03	3077.28	7732.68	6979.22	4584.92	2604.78	4783.06	1923.57	3740.55	3204.33	7586.64	4247.63	2132.05	2632.69	3230.37	1904.75	7974.24	667.527	3281.91	2791.67	3396.55	5613.06	6738.04	5997.72	1176.84	4584.44	2275.75	850.751	913.622	4123.93	839.137	3003.77	1946.24	1529.12	13136.1	80430.7	57941.6	12740.5	61146.1	45079	30575.6
M305T395			305.243	394.623			8904.36	23648	28541.8	24731.7	796.356	17324.4	11882.3	11597.8	9844.91	9207.83	14871.3	10970.6	11298.5	2204.87	16121.3	9259.55	10900.1	10037	5382.37	10340.1	3859.22	16235.9	12834	15065.9	10653.9	7655	12488.9	3447.24	11191.6	14305.3	11564.6	8682.39	10803.8	11309.6	2013.17	2014.93	1819.55	1932.04	3960.74	2123.24	2370.1	896.136
M306T374			305.708	374.32			1228.83	767.378	1101.84	730.581	550.694	875.864	280.295	1087.01	779.153	1159.78	838.451	1361.85	1045.25	239.098	1431.75	1016.05	1533.5	1798.72	1059.56	1367.92	330.14	2681.72	2600.27	2969.79	3348.13	3236.91	2967.36	329.392	4220.15	3298.32	4877.26	4122.48	6541.89	4612.02	1215.91	7838.34	5377.38	5170.86	5943.61	3782.07	5622.45	1471.76
M306T393_1			305.742	392.764			3656.78	11715.8	13477	11134.8	8531.63	9703.21	3816.86	5650.41	4984.92	4237.48	7114.41	5140.98	5425.64	1071.15	8313.21	3844.04	5457.64	4577.24	2225.53	4883.53	2254.53	7766.26	5023.46	6934.19	5365	327.154	5083.21	2886.52	777.17	651.061	700.29	632.415	672.191	686.625	56.562	1284.33	143.143	1612.17	1552.42	164.496	951.312	738.441
M306T51			306.156	51.374			1665.41	1531.67	1890.25	1190.24	1618.14	1579.14	254.583	1597.36	2056.95	1550.3	2375.67	356.495	1587.36	767.863	2339.68	2610.87	2558.11	3227.4	1836.1	2514.43	502.544	2072.11	1326.99	1483.41	3396.89	3418.8	2339.64	1013.97	26296.3	25316	25340.4	35501.4	14968.2	25484.5	7273.89	14156.5	13576.9	11178.1	10867.5	8748.39	11705.5	2192.86
M307T495			307.227	495.155			5363.15	2177.65	4398.42	5791.96	3281.11	4202.46	1488.36	4448.36	15444.5	2372.68	1736.18	10968.1	6993.96	5972.55	1952.32	1798.58	4221.83	3200.98	1683.41	2571.42	1105.59	9884.69	2376.26	8864.85	13701.3	24719.2	11909.3	8239.41	8383.05	4864.31	11475.5	22584	15657.7	12592.9	6854.13	3025.27	1294.52	4257.42	1333.39	998.001	2181.72	1407.84
M308T306			308.295	306.366			2243.37	1603.66	1471.79	1955.43	1469.8	1748.81	340.197	1635.56	1422.89	973.054	1302.37	1050.46	1276.87	271.199	1685.42	1604.47	1017.92	1630.37	891.992	1366.03	379.022	1679.78	1459.01	1059.72	34774.5	2029.17	8200.44	14859.5	25206.9	27477.3	20324.5	25444.3	23167	24324	2707.06	5956.04	3553.07	3812.47	3740.73	3178.96	4048.25	1094.38
M308T399			308.231	399.403			7340.94	8719.64	15670.1	16575.6	6948.32	11050.9	4687.45	5917.51	4271.8	5464.94	2842.02	9463.15	5591.88	2470.49	3614.03	4316.6	4644.19	9421.98	1879.49	4775.26	2808.62	10627.1	15744.1	18420.4	1416.32	38474.7	16936.5	13676.6	32403.9	49121.8	25767.7	48083.8	45499	40175.3	10475	31964.6	15933.1	29134.1	16726.4	12942.6	21340.2	8582.93
M308T443			308.144	442.567			1282.73	2805.62	18462.9	9676.44	8543.52	8154.25	6792.7	6473.58	2492.08	877.038	2926.16	20650.6	6683.88	8070.37	1370.95	2461.14	1680.4	14304.9	841.413	4131.77	5717.13	222.979	289.293	297.682	192.358	154.066	231.276	61.8882	250.128	134.64	208.545	202.801	171.429	193.509	43.2179	187.931	108.623	116.789	200.365	202.421	163.226	46.5397
M310T72_2			310.117	71.7135			6610.93	9605.87	10305.9	11907.9	10853.5	9856.82	2000.04	8251.24	8440.01	11506.4	10766.6	11042.9	10001.4	1535.92	10746.5	7702.53	11384.3	11208.1	16122.4	11432.8	3017.91	21369	13354.7	17997.8	60901.7	22199.4	27164.5	19178	24922.7	36825.3	27630.7	16119.5	42259.6	29551.6	10246.2	12649.2	13412.5	9718.2	2446.3	11244	9894.03	4395.8
M311T361			311.258	361.006			16146.7	13667.4	10635.6	22535.2	15689.7	15735	4378.75	21996.3	10381.1	9524.55	20264.2	22710.3	16975.3	6479.1	10589.6	10750.3	22654.6	9997.63	8896.66	12577.8	5679.84	15346	28666.8	8023.97	8841.82	14037.7	14983.3	8282.72	10597.7	41970.2	15981.3	17244.7	25920.4	22342.9	12272.3	9148.28	8500.2	8180.13	10197.4	8198.2	8844.84	851.507
M312T209			312.208	208.542			559.896	969.905	931.358	711.743	576.461	749.873	192.982	2843.82	1529.5	671.954	562.168	1432.56	1408	912.982	678.925	2369.71	542.424	843.37	576.685	1002.22	773.35	1133.27	14343.8	1327.34	1798.55	1005.67	3921.72	5833.88	9777.83	675.393	10114.8	20732.2	1057.05	8471.44	8223.21	10788.3	6945.74	5073.59	4138.99	1737.73	5736.86	3389.85
M312T316			312.156	315.575			3964.01	4419.28	4467.75	9253.99	4237.08	5268.42	2236.74	1059.15	891.247	1291.94	1014.51	1469.35	1145.24	232.155	1086.79	820.784	1035.41	1858.51	746.267	1109.55	442.243	3207.4	8746.79	3971.55	17428.8	11381.1	8947.13	5822.46	12257.3	18150.8	10534.5	15167.7	12222.3	13666.5	3010.13	1825.07	2791.57	1883.72	3282.26	1711.24	2298.77	698.561
M312T362			312.149	361.569			1600.6	1223.44	1697.72	1812.89	713.043	1409.54	447.769	1560.81	1512.96	1866.03	307.644	2128.67	1475.22	698.519	1483.19	1294.24	814.906	1920.3	994.768	1301.48	432.099	1943.75	1808.12	1994.46	2552	2582.1	2176.09	363.496	667.453	3503.91	3787.41	2863.9	2042.34	2573	1258.84	2240.52	32636.5	2106.62	12340.7	32603.4	16385.5	15390.3
M312T372_2			312.254	371.604			19342.1	12316.5	22222.6	10395.5	13166.9	15488.7	5039.55	11031.1	4137.84	15530.4	8311.68	7367.05	9275.62	4277.05	8641.33	13144.6	8507.56	7259.49	4720.5	8454.7	3058	19236.6	18072	22350.5	38873.6	4652.07	20637	12243.1	18285.6	27221.2	3300.38	22976.1	41538.9	22664.4	13885.7	6849.06	15849.9	7373.35	31271.3	16677.4	15604.2	9887.72
M313T419_2			313.274	418.76			3906.58	7442.87	9291.94	7180.94	7267.51	7017.97	1944.29	9288.71	15481.5	12275.8	11516.2	14546	12621.6	2466.35	14615.8	15103.2	19883.3	17550.9	18227.1	17076.1	2200.92	23829.6	16917.3	24064.7	10120	6822.8	16350.9	7832.04	25129.6	21675.1	27485.5	12777.7	7462.85	18906.2	8492.81	67063.4	4848.89	86084.9	5142.08	5029.69	33633.8	39771.9
M313T514			313.274	514.43			16275.1	27804.4	21699.7	19928.4	16458.6	20433.2	4724.45	14903.1	24781.5	10289.1	24068.2	17304.9	18269.4	6164.03	18726.9	11373.3	20130.1	11177.2	18120.6	15905.6	4289.9	26164.4	43171	34849.5	38406.2	33749.2	35268	6278.2	30292.9	32501.9	30466.4	32194	44920.7	34075.2	6143.47	15456.9	10059.7	10507.6	6053.24	6291.85	9673.85	3835.18
M314T377_2			314.195	377.241			2110.39	2906.36	1878.62	1683.2	1998.47	2115.41	469.619	1321.42	1655.22	2001.26	2043.77	2106.55	1825.65	331.896	2093.63	2642.17	1570.14	638.447	1491.99	1687.28	746.467	5676.73	4666.09	5008.96	4090.32	2904.37	4469.29	1046.48	5954.6	6199.51	5475.73	4567.83	4046.32	5248.8	916.946	9099.61	21736.7	1267.82	6462.33	23803.6	12474	9839.49
M314T403			314.269	403.388			4218.81	6838.24	7238.78	6201.22	4357.18	5770.85	1404.16	2627.99	2510.41	5634.36	4261.2	3729.45	3752.68	1285.3	4253.29	2920.54	7886.39	5946.14	2602.56	4721.78	2206.18	26592.8	8445.37	7785.97	7221.25	10949.4	12199	8171.37	15581.2	23442.2	17084.9	14995.4	16642.1	17549.2	3397.08	12914	41277.1	14590.9	26162	46935	28375.8	15369.5
M315T374			314.713	373.533			208.567	739.872	833.314	867.228	979.896	725.775	301.601	469.797	791.742	511.834	775.439	760.179	661.798	157.188	340.531	397.436	566.019	798.146	480.834	516.593	179.018	1236	820.174	820.81	595.256	833.279	861.103	231.998	1099.84	582.826	417.162	1277.65	1093.3	894.157	371.983	5861.27	1962.99	4774.84	3197.04	3509.41	3861.11	1500.26
M315T376			315.191	375.789			17729.1	25440.7	31803.2	22300.7	16837.2	22822.2	6114.46	21540.7	14808.1	12894.7	18654.4	16528.2	16885.2	3360.39	23079.9	24631.4	16041.8	21385.4	8458.8	18719.5	6586.4	22142	23479.2	20744.3	25910.4	12438.5	20942.9	5121.3	28573.2	28970.5	25781.4	51319.3	37755.8	34480.1	10430.8	13545.8	8940.87	5618.36	9576.17	6706.01	8877.43	3066.84
M316T259			316.109	259.165			1218.37	6367.2	897.53	376.852	1090.64	1990.12	2467.79	1052.77	690.412	5148.34	13583.5	300.413	4155.09	5620.69	1737.11	8297.03	9364.37	1491.45	1231.01	4424.19	4044.19	1641.99	1460.73	2121.46	3047.43	285.684	1711.46	1006.66	1699.92	4525.28	1711.88	2244.74	28174	7671.16	11520.4	1261.32	1241.86	1088.98	1282.28	428.468	1060.58	361.484
M317T131			317.045	130.972			14990.3	2601.39	4341.89	3736.28	4104.51	5954.88	5094.93	3831.87	3013.79	7403.03	3250.69	2725.17	4044.91	1920.81	8049.79	21422.7	5023.68	17022.1	3995.92	11102.8	7718.83	2491.85	2636.82	3117.62	13135.8	6057.13	5487.84	4514.9	2310.54	2187.48	2266.11	2060.49	1613.78	2087.68	281.417	1511.49	1514.27	1330.69	1575.82	1431.27	1472.71	94.5363
M322T358			322.133	358.088			2764.66	3968.69	4830.75	4391.24	4078.5	4006.77	770.745	1169.56	1284.24	1166.75	1033.99	1013.15	1133.54	111.26	997.449	811.837	1082.64	4521.36	678.171	1618.29	1630.52	3103.91	3726.43	2960.97	4824.72	2281.33	3379.47	957.353	8401.97	8631.39	7296.07	6585.54	6110.26	7405.05	1102.01	1436.04	1395.16	1082.8	605.284	1171.99	1138.26	332.773
M323T49_1			323.039	48.779			8310.41	4075.63	3442.54	4575.56	3970.09	4874.85	1962.24	4467.3	4319.64	3003.75	3504.37	3490.25	3757.06	617.141	4795.32	2031.46	2706.5	2545.03	981.627	2611.99	1394.22	2886.29	2175.16	3964.55	4294.76	1351.17	2934.39	1224.46	2020.61	1371.34	2565.27	2597.85	1378.37	1986.69	603.765	395.965	1405.77	1118.62	1210	1121.55	1050.38	383.979
M324T361			324.254	361.215			566.843	911.362	685.66	2164.85	806.084	1026.96	649.064	657.92	397.126	470.206	615.622	834.112	594.997	170.504	525.942	641.189	565.848	954.694	336.642	604.863	225.497	946.775	953.855	838.023	4073.2	1683.83	1699.14	1369.25	6442.22	6898.42	7926.68	6534.97	5343.02	6629.06	929.248	2773.92	2362.17	1818.53	1883.31	1950.85	2157.76	404.552
M325T390			325.235	390.372			5722.46	9820.63	10052	9690.52	3224.57	7702.04	3079.42	6212.46	14422	7333.33	8725.64	9375.07	9213.69	3159.64	8886.47	6398.75	17344.4	12828.8	25397.9	14171.3	7520.77	39314.2	58919.8	54047.7	51177.7	62505.4	53193	8901.25	90463.8	69390.7	73224	87113.6	111984	86435.2	16841.1	172348	132489	138677	95548.1	1469.27	108106	65546.2
M325T398			325.178	398.427			1470.21	37323.2	1916.8	1584.94	1829.94	8825.02	15932	1894.15	14652.1	1612.87	30288.1	1629.12	10015.3	12642.9	840.85	24411.8	17993.1	1893.18	675.692	9162.91	11232.1	2094.92	1113.28	1203.34	1240.44	868.563	1304.11	465.217	19684.3	9941.82	9161.11	17316.9	895.112	11399.8	7435.24	9681.07	3057.14	708.604	5146.41	363.689	3791.38	3818.25
M326T357			326.379	357.14			3065.25	3501.95	110734	5852.2	5912.09	25813.1	47490.2	4056.96	2988.07	3142.56	4084.12	5682.93	3990.93	1072.54	5050.5	4091.76	3341.82	3023.04	2027.68	3506.96	1137.35	5269.48	3591.42	9219.89	4515.5	2921.3	5103.52	2468.11	3589.66	4902.02	5081.75	4485.87	4067.47	4425.35	609.957	2155.9	4696.14	2839.42	2815.27	2467.39	2994.83	991.571
M326T391_1			326.174	391.319			3649.73	1133.72	1562.7	1894.29	1815.39	2011.17	962.794	883.222	3363.92	1452.54	2380.29	2560.18	2128.03	972.581	1269.14	1413.82	3627.65	1188.33	3939.91	2287.77	1372.5	1010.1	454.887	1056.55	1213.96	997.066	946.511	288.066	1573.26	1937.4	1586.17	1024.9	1984.07	1621.16	384.304	1875.17	1808.65	1699.75	2387.64	1988.66	1951.98	265.146
M326T395			326.269	394.732			2962.37	5335.96	6259.58	5762.4	6216.47	5307.35	1363.82	6076.65	4154.61	7205.1	6877.11	4618.69	5786.43	1352.12	6352.53	4337.5	7336.35	4200.01	4737.5	5392.78	1384.22	25974.2	9972.63	10065.9	14601.7	12529.3	14628.7	6626.19	15547.4	16458.4	18933.1	17167.3	11491.2	15919.5	2769.38	9381.2	45401.8	6648.99	21877.6	35916.9	23845.3	16727.2
M326T404_2			326.249	404.453			8141.82	11711.3	11620.8	11021.2	7764.53	10051.9	1938.76	7707.77	6927.44	6365.15	10145.1	8188.5	7866.8	1454.04	11986.9	8564.47	7939.71	9563.24	3766.94	8364.26	2996.53	7813.5	2979.5	4133.24	3761.55	934.346	3924.43	2501.42	3959.39	5805.13	4338.73	2130.14	1653.32	3577.34	1694.47	9644.07	1096.1	34681.1	2957.3	1749.95	10025.7	14197
M326T409			326.306	409.158			19536.7	15639.9	16193.1	17129.7	21661.9	18032.3	2517.85	19751.3	14661.1	23126.6	14044.7	18064.3	17929.6	3745.72	18872.7	13980.1	20548.5	13694.9	18665.1	17152.3	3114.44	21999.8	9540.97	11222.4	5310.66	13288.4	12272.4	6178.25	7011.71	12082.9	8767.07	9127.36	9921.53	9382.11	1847.09	14302.9	3668.38	25291.6	41384.9	116999	40329.4	45074.8
M327T359			327.253	358.634			3510.76	7014.57	8569.41	3436.33	1959.41	4898.1	2768.36	4666.86	2201.1	3178.15	4285.22	4516.67	3769.6	1053.46	3210.12	3755.79	6197.47	3789.95	4934.46	4377.56	1195.51	17669	18232.8	14890.3	24847.7	20930.7	19314.1	3764.3	37312.9	31651.3	37077.2	35879.4	40912.5	36566.7	3329.32	57308.2	47033.7	52388.8	38486.7	82682.2	55579.9	16680.2
M327T409			327.309	409.253			5027.06	3909.43	3529.47	3579.36	8151.75	4839.41	1947.78	4050.99	3849.91	5449.94	4208.2	4994.48	4510.7	681.12	4069.11	4341.63	4783.22	3559.25	4700.13	4290.67	499.228	5258.41	2329.09	2903.77	977.939	3017.47	2897.33	1548.88	1508.17	2947.44	2450.92	2149.45	2253.48	2261.89	521.182	3100.82	20838.2	5876.15	7557.12	15361.8	10546.8	7336.44
M328T359			328.256	359.408			3219.52	5568.55	4738.79	4246.02	4388.08	4432.19	850.366	1093.97	1324.47	1122.25	1266.31	1147.26	1190.85	99.4274	1073.65	1231.68	1318.88	1365.12	1138.9	1225.65	121.252	3873.88	8210.63	3067.08	5502.91	15137.7	7158.44	4874.54	7708.17	6697.79	8457.7	8551.33	13796.9	9042.37	2759.77	12886.2	3571.15	10916.8	6616.31	15841.5	9966.4	4900.72
M328T392			327.735	392.136			1176.74	2332.01	2032.44	2223.3	3861.61	2325.22	971.552	1347.18	2453.6	993.835	2380.7	1665.69	1768.2	638.815	2094.72	1235.85	3683.04	2079.79	2591.25	2336.93	896.362	5382.21	6829.9	7011.62	6633.55	4892.19	6149.89	950.009	8737.81	7002.64	8108.5	5813.3	8700.2	7672.49	1253.64	8863.28	5893.88	4527.49	7745.7	4341.99	6274.47	1987.32
M329T205			329.121	204.539			1165.37	1083.83	1406.11	1298.91	2101.71	1411.19	405.293	707.017	441.258	1702.9	1400.48	1232.41	1096.81	514.695	1620.61	560.999	1397.13	1607.96	1073.35	1252.01	445.265	2320.42	2001.39	396.95	1168.16	2671.37	1711.66	921.876	13783.4	11564.1	9657.35	12651.7	3886.18	10308.5	3899.1	16258.1	11502.9	12655.7	14848.3	10008.1	13054.6	2516.36
M329T210			329.23	209.526			1635.96	1844.47	1699.63	1648.4	1763.38	1718.37	86.553	1764.32	1829.87	1681.82	1741.15	1579.84	1719.4	94.3181	1598.3	2077.54	1482	1605.02	1363.04	1625.18	271.56	14407	6317.43	20174.4	25013.9	2332.37	13649	9409.24	16987.9	12028.5	53910.1	12183.8	6419.7	20306	19154.4	17163.5	10142.9	6212.96	3247.62	3378.36	8029.08	5824.44
M329T293_1			329.045	292.812			605.254	433.069	747.918	615.138	453.902	571.056	129.575	2018.71	1833.3	2978.72	1891.83	2482.53	2241.02	484.797	2216.83	3032.46	2004.48	3053.27	1707.48	2402.9	611.615	411.048	323.524	307.956	717.162	665.15	484.968	193.159	1820.72	1720.72	1612	2097.52	2188.16	1887.83	246.314	440.041	446.419	504.637	380.046	455.315	445.292	44.4639
M329T377			329.269	377.241			6987.87	4414.7	4714.72	4732.05	7803.79	5730.63	1552.38	6007.49	4633.53	8898.06	4345.25	6585.78	6094.02	1823.68	3665.97	5283.3	7167.91	4217.43	9485.39	5964	2379.31	34846.2	25521.7	21432.5	40072.5	33977.3	31170	7539.41	34587.4	25268.8	26593.9	52115.3	28500.8	33413.3	11046.6	25883	6386.18	25819.3	6289.77	7249.41	14325.5	10528
M330T361_2			330.27	360.938			16345.5	13294	17293.1	15443.2	28820.5	18239.3	6097.49	10713.7	5380.27	14424.5	11895.6	10543	10591.4	3300.25	12260.1	13110.7	12041.1	9380.93	5580.38	10474.6	3071.66	17452.6	14768.7	9746.83	8232.23	35391.5	17118.4	10872.5	6754.5	17278.3	20972.6	56183.5	27156.4	25669.1	18598.2	4496.81	4621.22	4331.33	4551.43	5494.63	4699.08	457.414
M331T176			331.126	175.873			1024.47	1383.45	1549.65	1337.81	692.287	1197.54	340.388	3043.03	3089.37	3798.37	2244.62	5417.35	3518.55	1195.51	2501.19	4677.3	3822.03	4661.07	2224.2	3577.16	1165.48	22434.8	12219.3	12526	30003.7	15413.8	18519.5	7623.58	20785.8	21877.8	19256.4	33293.9	10634.9	21169.8	8097.65	3511.42	3446	2321.49	3001.39	2824.81	3021.02	487.169
M331T213			331.127	213.064			1323.26	1126.75	903.42	1075.92	1472.28	1180.32	221.425	2378.89	2756.63	2933.46	1434.53	4918.55	2884.41	1276.14	1678.48	3281.34	2826.82	3451.87	1381.42	2523.99	941.624	20996.3	14461.5	11640.4	18202.2	9666.38	14993.4	4643.13	14622.5	14796.3	13813	22920.9	8198.76	14870.3	5256.09	2170.57	2800.32	2585.59	2669.64	2256.27	2496.48	271.184
M331T231			331.259	231.081			328.187	762.791	510.034	792.658	772.779	633.29	206.098	418.791	1112.55	877.787	1214.38	1157.6	956.22	326.58	884.764	613.111	1335.32	811.485	3143.7	1357.68	1032.8	1358.92	1666.55	1614.63	1947.52	2722.75	1862.08	524.568	3342.13	2070.69	3688.72	5784.82	3929.78	3763.23	1338.11	1699.16	1391.35	1844.12	1469.77	1752.37	1631.35	192.497
M331T269			331.073	268.693			1453.06	2293.41	2231.55	2163.88	2291.76	2086.73	358.198	1926.4	2016.53	11353.1	2392.3	1008.54	3739.37	4286.49	4452.96	7147.09	7439.29	2545.75	3144.89	4946	2253.31	1554.21	1287.75	2006.98	1951.62	428.445	1445.8	640.803	2268.03	18391.8	2545.96	2896.93	13031	7826.74	7446.36	1398.76	1387.21	1164.68	1569.61	1510.16	1406.08	155.127
M331T420			331.285	419.582			8777.64	18668.1	26356.8	20255.2	18997.7	18611.1	6315.61	23796.6	45429	32065.4	31571.2	39474.4	34467.3	8265.14	42485.9	42045.3	58868.2	57338.3	55476.4	51242.8	8284.04	88148.7	54241.8	81293.2	31346.1	24518.9	55909.7	28614.7	86523.6	74262.2	95850.5	41732.8	23270.1	64327.8	30746.1	177792	10786.5	201913	7981.74	10772.3	81849.3	98968.1
M331T477			331.3	476.807			741.389	8999.23	914.422	1155.25	1537.19	2669.5	3551	1007.81	3348.74	1034.48	1387.27	1016.76	1559.01	1013.12	560.143	950.009	1443.14	1133.2	876.651	992.629	325.974	3243.78	2468.88	3052.35	6216.5	2895.35	3575.37	1503.81	2459.26	2542.52	2695.87	2982.81	5415.13	3219.12	1243.71	2224.14	1100.61	1991.87	917.345	1010.64	1448.92	610.686
M332T189			332.124	188.819			11337.3	5588.68	3124.26	3370.85	3533.43	5390.9	3466.53	7680.68	5592.89	4301.28	5477.18	6695.56	5949.52	1286.51	3164.54	7668.12	8002.61	11124.9	4778.67	6947.76	3086.16	3308.81	2181.68	2656.39	4067.53	15274.2	5497.72	5511.02	3344.97	41517.9	5265.6	6671.24	6536.69	12667.3	16183.2	3899.74	1601.88	4045.46	3491.22	727.815	2753.22	1496.4
M332T413			331.747	412.834			4505.79	6359.79	4369.5	6081.9	1674.82	4598.36	1864.91	2239.7	4701.62	400.961	4817.68	3923.2	3216.63	1880.84	3954.98	781.543	4522.18	3640.2	2593.52	3098.48	1472.85	1755.71	2794.35	3680.95	1619.02	2029.93	2375.99	859.572	1397.22	1774.4	1462.29	1269.29	1931.08	1566.85	275.676	966.301	487.036	614.762	797.89	442.933	661.784	219.031
M333T205			333.106	205.441			3876.26	1595.68	1554.61	1702.82	2232.95	2192.47	979.743	3677.99	3316.87	4134.3	2913.96	4156.16	3639.86	534.731	4071.58	5866.12	3720.5	5221.19	2521.88	4280.25	1308.54	4434.75	1808.26	1542.92	2145.76	3895.71	2765.48	1309.47	8120.95	6191.66	9006.06	12871.8	2826.86	7803.47	3694.59	2497.16	3410.56	3039.62	2638.97	2983.69	2914	359.378
M333T394			333.242	393.726			6559.86	13743.3	17356.7	12932.1	12070.2	12532.4	3898.22	7366.5	5485.76	4744.88	9585.79	8583.97	7153.38	2036.57	28034.7	7809.06	5476.75	7493.91	3497.38	10462.4	9975.05	8967.97	6020.44	10198.2	8768.96	6336.77	8058.46	1804.73	5535.69	9094.75	8079.94	6658.03	7698.04	7413.29	1364.61	3930.61	9220.65	3162.46	18213.2	9236.51	8752.7	6009.54
M333T396			332.754	395.65			1327.85	2920.82	3044.85	3610.65	1421.49	2465.13	1029.38	1890.05	2457.32	1245.75	2951.99	2284.19	2165.86	640.238	3020.85	1017.01	3054.45	2659.09	1887.77	2327.84	870.331	3454.33	2286.84	2808.66	1639.96	1771.64	2392.29	752.267	1800.89	2660.93	1920.6	1604.83	2339.81	2065.41	428.08	856.241	307.476	335.16	1737.23	2845.99	1216.42	1079.27
M334T156			334.119	155.798			1438.66	5685.16	1763.31	2315.07	3107.87	2862.01	1700.21	1299.88	1221.83	1826.96	1440.49	1447.98	1447.43	232.788	423.228	2267.83	4699.6	535.32	2854.58	2156.11	1774.79	3929.58	9178.97	4551.86	13710.2	12704.5	8815.02	4507.36	7147.1	44408.7	7806.88	11384.8	54862.1	25121.9	22738	6107.71	4892.47	5774.4	4969.01	4495.65	5247.85	668.295
M334T259			334.12	259.046			992.536	4271.81	828.178	1038.53	908.59	1607.93	1491.33	791.771	994.907	4126.46	9653.21	1155.82	3344.43	3782.81	1269.65	5462.35	5812	976.623	891.298	2882.38	2521.71	9253.45	4129.01	4580.69	11808.4	5558.48	7066.01	3329.82	3408.54	3191.45	2891.65	1098.41	18171.6	5752.33	7002.36	1531.34	1203.85	1207.95	1223.7	1328.94	1299.16	139.545
M334T393			333.74	392.529			1883.64	5517.06	3724.47	686.985	4427.02	3247.84	1948.46	2970.45	1994.09	2020.59	4215.19	997.985	2439.66	1213.14	2847.26	1602.11	2525.17	1616.14	1201.57	1958.45	694.295	1303.34	2085.75	1069.03	2497.57	1246.17	1640.37	618.177	2404.29	2623.11	1983.73	1692.7	1956.7	2132.11	374.507	2051.86	1812.36	367.053	4734.37	999.624	1993.05	1671.95
M334T398			334.216	397.87			1921.52	1165.13	1841.44	2342.54	1735.49	1801.23	423.69	2515.52	1587.75	1145.11	2096.72	4785.25	2426.07	1416.5	1727.45	1313.97	1446.61	2225.14	659.848	1474.6	573.945	1013.46	972.119	1202	2640.4	2412.11	1648.02	810.416	1431.01	1208.31	1093.48	1418.79	987.813	1227.88	196.079	713.177	1254.78	413.576	1555.83	17653.8	4318.24	7468.21
M335T375			334.701	375.312			737.107	406.458	648.067	854.48	883.114	705.845	192.006	458.034	619.221	956.372	513.205	921.833	693.733	231.681	332.407	429.145	809.444	669.393	565.061	561.09	189.163	3779.8	3141.91	3260.35	3274.73	1892.19	3069.8	702.564	4141.93	3663.6	3913.61	3435.52	2876.99	3606.33	486.229	608.774	919.664	1322.74	528.832	19464.5	4568.9	8332.73
M335T39			334.838	38.839			11352.7	6537.25	4602.15	3883.97	4647.1	6204.64	3041.09	8680.55	10351.6	3786.51	6345.98	6299.9	7092.91	2512.9	10394.9	3252.19	4316.25	3579.21	566.91	4421.9	3627.25	602.155	484.132	1207.67	1743.48	532.516	913.991	548.143	543.401	497.634	613.895	443.997	334.294	486.644	105.551	412.076	587.039	510.947	427.606	449.713	477.476	71.8668
M336T243			336.196	242.624			1957.37	3021.1	3212.02	9542.05	4225.67	4391.64	2989.56	4656.09	3730.92	5736.27	4235.14	3902.44	4452.17	799.997	8312.8	12440.6	14036.7	6966.04	2679.68	8887.15	4519.33	2250.36	1374.25	4808.93	63132.7	11013.6	16516	26330.7	7215.03	15269	7635.83	13465.1	31535.3	15024.1	9882.8	3633.82	2662.27	2628.3	3985.62	1507.16	2883.43	972.886
M336T396_3			336.311	395.894			44662.8	10962.1	11408.3	23816.7	12163.5	20602.7	14473.4	11058.9	8900.17	10779.6	14648.9	25958.4	14269.2	6857.3	7447.89	8291.25	9336.29	21450.6	6212.4	10547.7	6201.52	26591.8	57206.8	56528.1	92561	30642.5	52706	26419.8	14170.8	13993.2	38457.8	22689.9	61114.2	30085.2	19998.8	50476	133216	96959.3	33808.6	5481.21	63988.2	50980.4
M337T362_2			337.203	361.997			4149	3511.69	3932.69	4280.99	3933.04	3961.48	292.062	4435.12	2309.07	6248.87	4870.7	8549.64	5282.68	2309.6	2916.92	3519.55	2365.24	3933.33	1721.44	2891.29	884.095	14996.5	10662.6	14554	30824.7	11816.4	16570.9	8173.62	14370.3	14112.1	14114.1	15901.3	11988.2	14097.2	1394.41	6517.79	1564.6	5801.11	5245.8	4731.04	4772.07	1911.84
M340T177			340.091	177.052			986.028	1108.4	1498.42	1488.33	1686.33	1353.5	293.711	1037.08	1096.96	1219.2	1141.49	1303.73	1159.69	104.392	1511.68	893.849	1968.77	2226.67	1422.97	1604.79	516.33	1570.17	1835.76	1945.78	2142.09	1896.4	1878.04	206.893	16305.5	12170.2	15439.6	18560.6	5075.74	13510.3	5243.52	6760.46	5368.52	4570.86	5006.18	4656.46	5272.49	889.657
M340T354			340.189	353.922			2689.41	2898.54	2350.23	3671.57	2945.96	2911.14	485.644	1004.97	1061.11	1504.9	257.771	1955.8	1156.91	632.464	860.714	929.8	1007.74	1420.07	875.964	1018.86	231.548	4250.59	10729.8	2537.48	23382.7	10244.2	10228.9	8187.96	17335.1	30489.5	18847.7	22758.4	11107.8	20107.7	7160.33	4182.03	3951.07	3562.33	5989.2	1847.76	3906.48	1480.91
M340T408_2			340.254	407.791			8111.5	10902.8	7189.85	10732.9	9250.5	9237.52	1617.91	3431.81	11085.4	10024.7	9710.35	8926.45	8635.73	3010.4	9940.57	1622.77	9979.08	9480.85	33733.3	12951.3	12146.7	33713.4	74512.4	73994.7	37090.8	55340.1	54930.3	19464.6	48879.9	45739.9	53863.9	42987.3	47132.5	47720.7	4054.55	100201	42522.2	116533	20994.8	59663.7	67983	39750.8
M341T373_2			341.23	373.165			3096.44	2476.86	2962.51	10736.9	2728.02	4400.15	3550.21	2366.02	2710.33	4218.4	35559.8	19083.2	12787.6	14506.9	3334.87	2471.35	3412.87	17745.8	2237.28	5840.44	6675.38	5238.34	8078.14	4928.33	8678.24	7553.8	6895.37	1704.85	4073.26	3769.74	4665.19	6863.29	13361.5	6546.6	3997.24	38857.8	40524.7	65051.5	17737.7	29266.5	38287.6	17502.2
M342T343			342.316	343.078			843.71	808.931	1091.38	506.518	1229.13	895.933	278.907	936.809	801.019	890.022	412.593	1419.14	891.917	359.861	778.78	880.442	957.835	831.12	746.307	838.897	83.8447	8276.06	6442.25	7978.77	27999.1	7456.36	11630.5	9176.87	11248.1	5393.9	33134	12566.2	6933.12	13855.1	11176.3	16948.3	20795.9	7155.3	11060.4	21403.2	15472.6	6211.52
M344T325_2			344.221	325.246			4481.84	3442.39	3788.74	6260.86	3391.89	4273.14	1193.31	1667.91	1554.12	1861.06	2377.71	3132.51	2118.66	648.698	2176.11	1170.79	2516.11	3285.64	1451.44	2120.02	846.571	21751.7	18200.7	21152.2	15142.3	16233.3	18496	2920.14	18456.1	15263.7	85668	10083.4	90201.2	43934.5	40309.3	23883.5	22428.4	20932.2	23419.9	22013.9	22535.6	1167.62
M345T352			345.264	352.307			1548.09	1892.28	3916.84	1266.85	1045.46	1933.9	1152.92	1257.3	1310.4	2041.55	1317.16	1768.78	1539.04	348.635	815.389	1770.1	2307.17	1750.36	1348.71	1598.35	554.611	2306.91	4196.47	5382.21	12672.8	3794.32	5670.54	4065.77	5611.84	5931.43	4372.66	6826.15	11305.8	6809.58	2662.74	5995.08	4668.02	8068.88	4048.84	3953.79	5346.92	1725.97
M345T371			345.204	370.673			3198.72	2148.33	3364.13	3226.13	2575.37	2902.54	519.943	1917.54	2541.39	2839.09	2744.2	2939.39	2596.32	406.9	2214.5	1864.4	2331.13	2503.84	1690.43	2120.86	335.67	38961.5	5959.72	18177.4	25978.3	6683.77	19152.1	13869.5	8828.76	7437.86	7448.56	10552.7	10212.4	8896.06	1475.08	4878.05	1633.73	6451.28	4245.14	2424.89	3926.62	1929.58
M346T303_1			345.717	302.862			391.214	967.739	1126.08	2614.24	1472.85	1314.43	825.015	970.518	609.023	641.825	694.973	1563.06	895.879	399.339	1152.13	303.342	1493.55	846.701	1454.33	1050.01	492.309	3842.92	3366.25	3280.6	5147.7	6681.43	4463.78	1447.04	12276.3	10270.7	9605.17	9846.34	8878.47	10175.4	1278.5	20528.6	20320.8	18686	19300.2	20513.1	19869.8	833.22
M347T300			347.1	299.618			825.168	966.729	900.246	1105.15	986.988	956.857	104.335	1364.39	953.509	5343.73	1272.45	973.88	1981.59	1888.14	7780.88	8894.55	17200.3	6986.81	4691.91	9110.9	4777.39	918.453	880.765	1137.36	914.288	1186.58	1007.49	142.841	7690.67	49359.5	6717.59	10154.4	30418.9	20868.2	18652.4	5237.14	5000.32	6176.7	4394.93	4495.62	5060.94	714.63
M347T423			347.254	423.254			10250.1	13405.9	15084.5	34705.7	34454.2	21580.1	11993.8	19370.1	8417.73	11928	14642.3	30564.4	16984.5	8581.19	14337.7	14807.3	10385	33711.9	3521.67	15352.7	11214.3	6440.22	7776.03	11717.8	6850.71	4188.8	7394.71	2753.16	4464.87	5217.08	16922.9	3578.23	4511.76	6938.96	5611.37	25356.1	12430	112809	3547.58	2456.57	31320	46468.7
M347T424			347.22	424.383			25465.1	7420.56	7318.94	2204.28	3256.28	9133.02	9427.38	13931.8	9817.51	18687.8	20425	11198.5	14812.1	4618.01	25599.2	17745.3	17626.2	17497.4	20149.3	19723.5	3463.12	4656.16	371.04	1289.65	494.591	3009	1964.09	1836.52	11128.8	16862.3	15950.7	5844.02	3695.09	10696.2	5881.69	36911.2	6492.46	42339.4	5977.03	6488.66	19641.8	18344.3
M348T409			348.288	408.793			18118.2	14012.5	10420.8	8222.54	13169.9	12788.8	3758.42	12279.2	12554.9	6241.33	11386.6	10259.8	10544.4	2567.02	13829.7	9660.82	14853.9	8206.4	14230.7	12156.3	3008.71	17497.9	7114.4	9639.91	3523.54	10993.6	9753.86	5179.38	6267.55	11048.1	8361.06	8173.06	8794.54	8528.87	1709.21	8536.57	3499.1	6597.4	4533.05	2923.47	5217.92	2324.02
M348T412			347.762	412.339			1431.99	1506.41	1769.05	1341.9	1014.75	1412.82	273.64	1472.03	2421.62	451.178	2196.53	2283.31	1764.93	821.275	2091.67	1371.32	2614.03	2095.01	3250.71	2284.55	698.056	1094.23	398.877	557.693	243.258	1032.89	665.39	380.718	1190.8	1301.18	2102.79	1390.92	1134.4	1424.02	392.17	12786.8	1252.69	19802.5	648.598	1086.4	7115.41	8741.69
M348T445			348.288	445.124			5203.34	13631.3	16809.6	57274.6	15739.7	21731.7	20385.2	17844.4	5705.92	1012.7	30327.8	110680	33114.1	44830.4	18351.3	13041.1	7908.43	77929.1	1652.06	23776.4	30896.9	988.762	905.337	1102.98	1063.58	1017.18	1015.57	75.5279	715.911	801.83	983.307	593.245	765.324	771.923	142.025	679.39	5508.44	2285.67	1045.68	653.853	2034.61	2052.54
M349T165			349.18	165.31			2085.34	2287.98	1557.79	1915.08	1809.88	1931.21	276.344	1947.8	1225.17	2612.07	2239.92	795.432	1764.08	742.961	1972.06	620.699	2208.13	571.911	1609.16	1396.39	761.092	4758.36	5409	4862.95	2685.19	13663.9	6275.88	4258.12	16357.7	13775.9	15102.6	12429.1	9887.68	13510.6	2500.28	17030.8	11786.7	13509.5	17441	17558.7	15465.3	2650.18
M349T363			349.198	362.771			3827.28	4067.01	3478.2	2319.37	4633.78	3665.13	861.989	4755.88	4151.22	6542.54	3538.16	5249.71	4847.5	1144.83	4614.84	6027.06	3487.61	8892.49	2608.33	5126.07	2463.87	1207.47	3301.61	35802.8	7637.8	23399.3	14269.8	14848.6	6258.94	6229.82	13290.8	7452.82	7493.32	8145.14	2941.44	2849.24	4561.02	7820.12	2551.62	6759.05	4908.21	2335.5
M349T393			349.235	392.627			7198.18	4976.77	4652.65	4475.61	4072.86	5075.21	1230.8	2402.33	2850.8	1737.44	3092.22	2723.4	2561.24	523.446	2835.25	3073.2	3697.14	4027.39	4477.16	3622.03	674.805	10555.5	10135.4	7493.63	11263.7	14712.2	10832.1	2595.61	19630	14801.8	15529.8	18611.1	23280.1	18370.5	3411.54	27514.9	22414.2	21776.2	29283.7	23890.1	24975.8	3278.1
M349T481			349.234	481.262			329.167	533.554	574.524	906.304	580.758	584.861	207.039	831.624	1349.92	513.284	14912.5	12569.6	6035.39	7089.17	555.611	637.33	721.193	457.694	484.128	571.191	109.063	602.646	402.985	454.746	435.049	449.942	469.074	77.36	400.586	469.101	430.857	485.585	497.317	456.689	40.17	598.454	407.477	598.799	260.013	166.638	406.276	195.46
M350T318			349.741	317.906			740.932	55147.4	936.732	1149.21	844.419	11763.7	24252.7	623.805	687.923	560.88	954.014	587.46	682.817	158.917	449.072	609.65	1764.76	571.593	5837.52	1846.52	2293.63	907.775	595.675	1043.7	1682.11	1600.07	1165.87	464.138	1522.85	2124.49	1540.25	1675.77	1221.24	1616.92	328.779	804.974	908.6	896.32	944.129	1028.78	916.56	81.0515
M350T326_1			349.741	326.013			764.972	60876.9	661.989	819.756	703.534	12765.4	26895.2	791.187	799.852	537.052	969.362	693.005	758.092	158.563	478.056	692.074	1744.22	686.364	8481.72	2416.49	3426.49	1110.73	966.869	919.31	2190.93	833.327	1204.23	560.672	916.713	966.169	823.432	816.537	1186.74	941.919	150.766	773.251	946.565	954.03	918.028	928.213	904.018	74.4868
M350T506			350.342	505.684			1008.45	737.31	2211.69	3177.98	2098.31	1846.75	987.706	1600.3	930.021	689.412	1871.13	1775.61	1373.29	530.429	3441.13	783.685	888.586	17191.9	480.598	4557.19	7162.38	501.117	550.129	552.295	426.396	449.879	495.963	57.2213	455.846	507.469	555.377	471.042	447.465	487.44	44.3894	538.496	544.992	681.455	431.819	567.365	552.825	88.975
M351T331			351.132	330.981			993.869	734.038	864.828	1001.69	973.877	913.66	114.518	554.71	980.953	1584.64	777.713	912.622	962.127	384.161	2209.65	1115.55	1975.18	2881.12	923.893	1821.08	806.402	11812.1	2300.29	3314.76	7879.61	2438.13	5548.97	4179.75	27428.3	19073.4	26773.4	39043.1	10944	24652.4	10468.3	10270.1	9761.68	7862.36	7609.87	6687.88	8438.38	1515.65
M351T386_2			351.301	385.583			3608.18	2777.87	2862.36	2831.91	4001.33	3216.33	555.673	2457.63	1254.71	3611.8	2251.62	1852.88	2285.73	871.713	2293.08	3318.92	3409.47	2170.92	1828.59	2604.2	715.084	2866.69	353.609	1569.93	17420.9	2969.33	5036.08	7005.36	13339.5	11602.6	12945.2	20174.2	12065	14025.3	3505.64	306.067	977040	2944.4	858.146	1822.18	196594	436284
M351T402_1			351.391	402.215			783.942	1305.71	1277.56	1220.5	448.565	1007.25	377.364	1052.82	2146.59	827.878	1122.71	1141.3	1258.26	512.011	997.286	794.678	894.774	589.837	809.943	817.304	150.584	2060.72	2671.32	1639.55	1614.88	1025.49	1802.39	609.717	2399.42	2643.96	2252.86	567.775	1002.49	1773.3	925.674	2517.96	734.246	1581.32	934.169	422.645	1238.07	831.724
M351T439			351.251	439.092			5201.99	5702.62	7073.29	5113.27	6953.09	6008.85	944.919	6584.85	5900.29	7063.71	5162.93	5979.09	6138.17	722.691	5939.05	6824.03	7845.27	7447.31	9051.55	7421.44	1161.03	8093.27	11671.5	14921.1	5493.11	8120.39	9659.88	3671.29	16025.8	14824.9	17745.4	8856.52	9520.93	13394.7	3984.29	41566.4	24232	19768.3	257907	15082.5	71711.3	104567
M352T413			351.759	413.44			14824.1	18759.3	12361.4	18020.3	4584.76	13710	5709.74	5202.96	16771	462.161	14097	11711.6	9648.94	6688.18	11010.1	2732.68	13655.1	9264.24	8741.43	9080.72	4034.05	6336.56	9354.48	11291.8	5475.81	6556.55	7803.05	2434.08	6221.29	5856.82	5231.19	4454.75	5661.85	5485.18	677.77	2458.87	1317.16	1335.67	2818.9	1507.2	1887.56	701.499
M353T218			353.111	217.991			2297.92	944.466	1264.28	1103.54	1193.78	1360.8	537.338	1026.52	1069.11	392.323	1076.4	1043.44	921.557	296.524	2577.92	1574.69	1740.26	3744.27	895.378	2106.5	1094.11	2539.62	1178.99	2157.43	4843.86	2431.89	2630.36	1348.83	10155.4	8685.1	10902.8	12712.4	3960.87	9283.32	3310.15	4156.56	4563.04	3171.85	4162.5	2717.57	3754.3	774.038
M353T387_2			353.269	387.082			13558.9	10889.7	14001.3	12733.8	17529.8	13742.7	2429.02	9998.99	8573.16	5752.42	9302	12406.9	9206.7	2408.93	11974.5	9775.21	13121.4	12204	8475.92	11110.2	1917.68	42321.7	30224.8	33134.2	23470.9	36065.8	33043.5	6978.66	31226.7	42379	37872.4	32417	32550.1	35289.1	4722.13	9981.54	44392.9	6642.67	41670.6	51912.4	30920	21009.4
M354T187			354.106	186.922			23228.8	11414.6	6165.38	7349.63	7835.37	11198.8	7004.15	14081.7	10738.8	17551.6	10649.5	14024.8	13409.3	2860.82	12678.1	18720.3	19542.3	26469.1	6924.59	16866.9	7402.54	3906.06	2600.75	2510.65	8091.96	29574.5	9336.78	11538.8	10074	118475	10968.3	12158.8	15542.6	33443.7	47579.1	5872.29	4703.75	6622.29	6321.54	5303.42	5764.66	773.87
M354T411			354.3	410.743			12149.6	6685.66	7940	6587.35	11067.8	8886.09	2570.59	5882.71	1434.6	8795.72	4202.41	2799.91	4623.07	2857.66	3292.83	10182.9	6965.66	6223.6	10023	7337.59	2874.3	14421.2	2849.18	4029.44	2718.69	3594.93	5522.69	5003.48	5047.04	9384.99	8430.23	4329.29	5360.98	6510.5	2245.49	3790	52957.9	8143.2	6078.29	9507.78	16095.4	20719.8
M355T326			355.185	325.984			2302.07	1743.78	2288.02	3075.94	2329.5	2347.86	474.61	2112.36	2252.63	1723.78	1766.85	5690.31	2709.19	1681.57	1330.73	1546	1724.26	3105.37	1099.15	1761.1	787.095	2972.98	3955.62	3028.16	5914.1	3033.26	3780.82	1260.89	2839.1	4667.3	82822.9	2973.84	3644.17	19389.5	35467.7	3061.44	3746.4	4120.6	3088.62	6578.27	4119.07	1446.29
M356T221			356.122	221.401			1099.43	2641.09	825.481	1459.96	319.272	1269.05	872.719	1396.41	781.776	8282.58	5825.66	1107.12	3478.71	3384.5	5997.59	12721.6	18420.3	6455.6	7988.53	10316.7	5254.41	1516.28	1664.44	1521.61	2539.33	3360.45	2120.42	813.116	4563.19	64392	7314.38	6102.31	58725.8	28219.5	30516	2894.4	1706.78	3696.23	3249.13	2609.31	2831.17	748.411
M356T413			355.752	413.258			570.204	929.11	389.408	987.138	563.086	687.789	257.999	707.484	4492.15	541.88	2417.08	3059.14	2243.55	1658.82	1284.34	748.045	3639.33	3051.84	4566.92	2658.09	1604.44	1353.71	1274.21	2098.18	1032.98	1274.96	1406.81	404.823	2675.1	1918.83	3507.36	2379.08	1568.77	2409.83	745.715	21359.6	2856.23	33043.8	2401.96	1498.51	12232	14284.5
M356T429			356.279	429.159			2117.44	2755.63	1914.36	4037.86	2422.21	2649.5	838.746	1750.7	1395.12	2336.02	1522.43	1810.33	1762.92	361.921	1510.68	3429.76	11093	2883.44	7423.05	5267.98	3929.28	2558.06	1120.39	2082.73	1025.03	1181.06	1593.45	686.809	1611.02	50467.1	5733.33	2013.19	22087.6	16382.4	20811	3317.69	2405.68	2122.42	1687.48	1254.9	2157.64	781.74
M357T64			357.153	64.464			40290.3	2139.32	1218.57	2893.71	3006.35	9909.66	16998.4	1837.74	1737.23	2782.06	1698.85	2301.41	2071.46	464.49	1254.33	1142.19	2557.98	1507.35	2590.73	1810.51	709.814	9296.01	3065.93	8731.62	4102.87	1648.3	5368.95	3445.27	4127.4	4095.6	3864.38	4073.85	5204.74	4273.19	530.906	4941.49	3085.83	4050.34	4247.91	4693.2	4203.76	717.47
M358T225			358.176	224.569			847.017	885.18	870.981	1039.02	1014.43	931.326	88.5778	1003.36	982.901	1190.47	940.748	726.856	968.867	165.721	1513.5	1112.75	1144.7	1881.74	492.269	1228.99	517.303	2604.73	1753.84	1486.48	64024.2	608.149	14095.5	27920.1	3252.58	2215.4	2677.99	1624.61	1420.38	2238.19	753.033	1949.09	2354.71	1619.04	2407.77	2554.37	2177	384.219
M358T293			358.119	293.286			740.316	5424.01	869.554	1212.55	1758.5	2000.99	1953.65	938.158	1352.45	2100.76	2324.55	961.672	1535.52	644.54	2262.01	2278.48	4637.02	1032.02	4598.8	2961.67	1594.27	941.786	1162.24	1042.93	4688.11	2077.49	1982.51	1578.61	2523.68	15424.6	3707.77	5189.17	11659.1	7700.87	5576.3	1056.86	1615.96	1286.91	1038	610.613	1121.67	368.783
M359T265			359.291	264.705			3794.87	4991.06	3641.31	4242.59	3958.28	4125.62	532.594	2671.31	5527.01	3392.76	3912.5	4895.02	4079.72	1144.86	2857.56	1920.55	5287.34	2793.24	12170.5	5005.83	4196.44	16262.1	12162.7	16796.4	20877.9	33616.9	19943.2	8243.68	18195.7	14389.5	21335.1	29294.4	14324.1	19507.8	6202.97	10345.1	6162.48	5173.07	11004.2	6827.99	7902.57	2608.58
M362T134			362.191	133.718			1664.94	2228.59	3472.33	1463.07	2881.23	2342.03	838.484	1911.05	2174.38	1566.27	30831.6	2105.91	7717.83	12923.1	1135.91	3097.84	1719.19	839.583	2245.53	1807.61	901.74	1956.6	3980.68	1409.54	2552.73	1238.55	2227.62	1106.78	1279.7	1935.8	1410.9	1239.16	2588.17	1690.75	573.719	1978.38	1233.33	2149.09	1415.39	2661.6	1887.56	575.923
M362T369			362.173	369.15			823.643	1058.47	1215.22	1046.93	1213.46	1071.54	160.479	379.848	775.499	1080.96	44222.4	1140.52	9519.84	19401.7	3249.14	1309.91	4446.09	1627.63	3852.75	2897.1	1375.44	1289.91	1093.49	1358.4	1370.01	2082.86	1438.93	376.635	1291.62	1356.91	1411.09	1181.74	1280.42	1304.36	86.4926	4224.29	1258.87	5112.89	44569.3	38104	18653.9	20881
M365T384			365.136	383.583			7443.47	7204.78	5998.27	7217.83	7081.29	6989.13	569.107	5803.68	8206.23	12652.8	6673.07	7822.32	8231.62	2647.6	2863.09	3962.18	4631.99	3870.54	4266.71	3918.9	661.137	60554.7	52080.3	56285.3	22269.7	7376.35	39713.3	23515.4	26330.8	68432.5	22394.4	25325	19180.1	32332.6	20372.1	9634.02	10531.7	12499.1	9628.27	9558.89	10370.4	1255.86
M365T409			365.186	409.236			2454.87	2226.09	2558.68	1269	3838.93	2469.51	919.776	927.829	1376.69	2288.74	723.394	2356.82	1534.69	757.617	689.201	2575.48	1302.34	1636.06	2148.65	1670.35	732.682	5342.36	1516.16	6344.56	4874.03	3926.9	4400.8	1832.65	4447.94	4695.77	14185	2363.92	5554.13	6249.34	4588.37	20368.8	31264	2803.29	2840.82	1020.31	11659.4	13505.4
M366T430			365.774	430.231			6471.82	10804.8	8571.91	9618.61	3877.53	7868.94	2741.28	4540.94	9454.68	640.858	8592.18	6350.65	5915.86	3521.05	5700.52	3347.73	5467.07	4216.72	4457.64	4637.93	960.614	1853.58	3411.2	4041.89	1158.26	1295.53	2352.09	1300.69	3032.59	3334.03	2852.51	2054.85	1377.1	2530.21	799.69	1172.41	2316.62	561.196	3618.02	2748.53	2083.36	1224.63
M367T325_1			367.246	325.361			3569.21	2160.74	5283.05	3520.79	2392.98	3385.35	1238.74	1984.3	2165.25	2642.25	2296.33	2905.02	2398.63	371.614	1713.69	1654.35	2361.71	2667.01	2318.66	2143.08	440.56	80745.7	27062.5	111408	34180	8622.39	52403.6	42355.1	7930.92	10200.7	8022.5	7655.22	15338.1	9829.49	3243.45	8168.7	7142.02	9143.93	6670.87	7047.99	7634.7	1009.81
M368T422			368.249	421.866			1142.65	814.379	26266.4	527.865	441.132	5838.48	11422.8	10795.9	4665.02	639.807	11751.4	12306.3	8031.69	5141.1	1640.62	21460.9	35638.3	1776.34	13930.6	14889.4	14336.2	2827.95	15019.9	1453.21	529.576	2851.91	4536.51	5941.82	54691	1143.31	1522.5	3055.2	3180.94	12718.6	23480.7	2821.97	3594.13	3970.44	292.584	2183.54	2572.53	1449.96
M369T310			369.311	309.971			930.866	1122.61	1126.18	4637.32	2514.56	2066.31	1571.2	721.732	1021.75	754.385	867.765	1706.48	1014.42	404.285	922.146	969.358	1169.54	986.793	1030.47	1015.66	94.3663	1872.91	3176.98	2684.73	2533.37	2918.54	2637.31	491.86	6445.6	3970.63	7121.4	6578.47	7553.36	6333.89	1393.25	1895.13	1556.38	1184.72	1345.4	1336.96	1463.72	275.05
M369T376			369.26	376.393			1861.45	2470.65	1814.09	1878.04	1709.92	1946.83	300.064	2056.19	1952.95	1680.13	2119.07	1719.81	1905.63	197.384	1631.23	1264.97	3205.82	1518.14	3363.56	2196.74	1003.52	27104.5	19910.9	15964.8	47759.3	2458.68	22639.6	16659.8	31232.4	18415.9	21852.9	32672.3	29390.4	26712.8	6236.38	27264	16223.8	21158.8	11464.8	453.319	15313	10166.7
M369T533			369.373	532.934			1141.82	865.908	1352.06	1511.29	1713.83	1316.98	328.109	1291.61	1620.56	889.658	1138.58	1418.3	1271.74	277.159	1225.45	1500.95	570.597	1501.15	597.436	1079.12	465.856	691.046	710.323	740.514	469.813	478.418	618.023	132.581	4022.24	19494.4	4166.48	3761.5	2184.66	6725.86	7181.67	497.118	439.295	990.216	606.638	327.366	572.127	254.543
M370T387			370.296	386.575			1972.76	7044.27	8706.28	7078.74	5821.48	6124.7	2537.27	4918.99	3816.75	6266.97	4966.23	4266.47	4847.08	926.572	5108.75	1461.39	4672.17	3636.25	4045.83	3784.88	1416.75	14604.7	8741.09	8061.71	24864.9	9197.14	13093.9	7076.27	12324.6	13953.2	12222.2	11987.3	10074	12112.2	1379.89	2912.28	7715.67	1803.17	7636.42	8709.71	5755.45	3154.85
M371T432			371.28	431.881			7069.22	3395.86	3954.48	2682.96	5641.71	4548.84	1782.61	2637.61	647.23	4080.1	2243.76	9330.11	3787.76	3330.64	8706.15	4492.79	2776.56	15007.4	7869.45	7770.48	4715.44	15181.7	1541.43	3428.38	2252.66	9174.32	6315.7	5796.9	1902.48	2367.18	6674.98	12012.4	17249.4	8041.27	6563.25	13128.9	48264.1	23561.4	26242.7	7846.21	23808.7	15595.8
M371T441_2			371.316	440.626			1872.18	2271	1440.99	1749.2	1986.89	1864.05	305.339	2208.46	6989.43	2949.68	3338.63	4555.01	4008.24	1870.47	4589.63	2328.09	7076	9112.03	8031.46	6227.44	2746.94	21229.5	22678.6	19445	16426.4	11788.8	18313.7	4329.27	20474.8	10292.5	14873.4	9761.58	22786.1	15637.7	5877.55	17028.6	1693.09	21414.1	1218.21	1135.08	8497.81	9913.52
M371T471			370.747	470.562			630.252	396.407	342.754	425.699	408.955	440.814	110.361	440.184	297.343	402.893	360.924	318.266	363.922	58.8659	496.33	472.033	615.017	450.335	678.587	542.46	99.2097	1322.69	3554.84	3876.54	616.033	653.023	2004.62	1591.17	3137.31	3930.89	2607.69	1434.16	1616.84	2545.38	1045.33	4108.81	1089.45	5711.71	815.373	1459.68	2637	2163.29
M372T378_3			372.281	377.774			1248.5	1748.17	2370.75	2004.8	2863.17	2047.08	612.297	1642.52	1703.65	2586.09	2077.59	3182.44	2238.46	647.88	1554.46	1285.99	1677.61	3873.46	1376.94	1953.69	1083.93	7288.43	11556	24016.7	19110.3	9519.26	14298.1	7019.62	2610.14	2740.72	3140.66	6396.92	10046	4986.88	3228.21	12807.7	25481.3	23681.2	4886.66	6404.99	14652.4	9560.04
M372T397			372.253	396.664			4689.41	2592.99	1744.22	1914.37	3971.38	2982.47	1295.9	2199.91	1570.15	1989.69	1174.16	2426.07	1872	501.613	1263.64	2455.16	1756.23	1810.71	1788.67	1814.88	423.664	2035.21	2699.28	3087.58	16959.8	3635.09	5683.38	6330.56	10929	22470.1	13364.6	10790.4	5149.58	12540.7	6315.9	2590.32	1039.14	1974.03	1108.58	2017.82	1745.98	660.439
M376T410			376.282	410.137			7620.84	4629.61	4979.31	3839.72	6916.56	5597.21	1600.2	3681.95	970.232	3508.28	2683.94	2185.51	2605.98	1098.91	4140.73	6265.93	4560.5	4294.87	1460.73	4144.55	1724.73	9167.82	2276.62	2193.94	2183.61	2749.4	3714.28	3057.5	2775.43	9251.01	7201.66	2492.73	2430.18	4830.2	3186.43	2673.86	61353	5958.05	66572.7	70476.5	41406.8	34033.4
M377T352			377.23	351.829			2243.98	2160.16	2414.97	2058.93	2318.84	2239.38	137.846	1757.91	1704.81	1757.54	1583.02	2936.38	1947.93	557.147	1329.86	1988.36	1958.65	2675.48	1141.61	1818.79	608.248	16397.4	12889.9	27516	18695.4	19659.1	19031.6	5411.84	14338	19678.5	14031.9	27686.3	20954.4	19337.8	5603.08	5719.86	3602.94	5236.21	4813.8	3748.49	4624.26	924.771
M379T381			379.265	381.47			1943.29	4770.45	6523.71	5652.88	4695.21	4717.11	1720.24	3556.6	2403.42	4196.05	3480.42	2263.3	3179.96	822.779	4225.45	2835.8	2946.93	3812.23	2218.21	3207.72	804.158	13057.1	7451.61	6155.09	19643.3	5504.93	10362.4	5982.58	16068.7	19468.1	13203.3	13019.1	11333.1	14618.5	3200.61	1451.38	974.973	1109.59	1975.56	577.781	1217.86	526.56
M379T439			379.282	438.921			12937.4	17578.6	15121.5	14400	11047.2	14216.9	2441.16	16170.5	23988.5	13124	20695.2	16128.1	18021.3	4293.88	24435.4	16909.8	25679.8	29682.6	28562.5	25054	5020.87	26885.7	35486.4	32279.2	27031.3	17748.9	27886.3	6737.18	41416.1	31654	40994.7	24174.4	33645.5	34376.9	7165.64	108590	14494.2	34539.1	3544.72	3576.08	32948.8	44136.2
M380T420			380.211	420.154			45201.2	46487.5	48092.3	35873.8	43854.8	43901.9	4753.58	48814.3	26117.7	25980.5	35313.5	24708.9	32187	10216.7	54297.9	56568.2	29558.3	36395	18263.7	39016.6	16344.7	21706.8	16047.8	19931.2	8661.95	12685.6	15806.7	5307.31	14870.8	18864.4	19126.9	10749.7	15832.8	15888.9	3420.13	17476.9	16535.6	18020	27536.9	3999.38	16713.8	8383.26
M380T517			380.389	516.57			2685.75	848.834	6341.28	5364.04	6365.97	4321.17	2453.64	5356.84	1591.54	666.77	2531.79	6075.33	3244.46	2364.35	6367.63	1838.96	1433.64	47778	245.171	11532.7	20394.7	270.953	81.7106	269.775	285.42	261.175	233.807	85.4689	280.359	109.95	287.232	212.123	323.595	242.652	84.4139	143.65	216.433	519.269	121.678	197.243	239.655	160.98
M382T363			381.734	362.517			643.282	1088.28	591.075	271.366	369.764	592.753	316.669	624.843	1044.25	828.28	947.108	667.202	822.337	178.83	873.151	539.375	1080.45	1227.82	888.822	921.924	259.096	905.153	2857.38	1882.84	586.187	653.05	1376.92	977.182	2331.59	1648.54	1145.75	1046.04	1332.36	1500.86	517.996	2601.98	4369.42	1758.51	4095.16	6121.86	3789.38	1688.55
M382T493			382.368	493.167			2337.19	2994.12	6107.61	37004.6	7197	11128.1	14609	6278.08	2548.35	643.223	11172.3	141047	32337.9	60903.2	4085.58	3315.98	1853.09	37120.2	358.388	9346.65	15591.4	596.141	440.589	662.213	568.232	515.43	556.521	83.6756	501.332	402.044	581.08	481.224	563.141	505.764	71.3164	333.214	427.793	868.591	542.694	469.276	528.314	204.725
M383T207			383.161	207.495			1972.37	822.778	1574.57	1980	1685.07	1606.96	472.963	6114.35	6105.75	5768.2	4383.6	5921.6	5658.7	727.06	5245.39	3809.13	6541.2	5233.12	4259.31	5017.63	1055.36	6447.75	5080.1	5818.76	5628.93	10350.6	6665.23	2117.35	13491.1	9380.56	13476.2	9904.96	8002.21	10851	2501.73	24946.7	21453.5	19801.2	27970.6	24047.3	23643.9	3167.97
M383T299			383.327	298.842			1163.23	1531.36	962.866	1176.69	897.494	1146.33	247.504	990.109	1015.2	1014.24	1302.89	1236.41	1111.77	146.375	1360.73	1293.6	1027.41	1219.88	1427	1265.72	153.875	19152.5	11749.4	9865.75	7087.98	16698.2	12910.8	4945.44	7712.78	9263.94	8725.4	12765.3	9355.13	9564.51	1904.75	5010.05	1841.89	3551.83	4734.8	2819.07	3591.53	1320.87
M383T365			383.4	364.669			544.708	2106.05	790.16	18966.9	64676.7	17416.9	27529.2	2129.16	748.823	1301.95	795.802	1087.62	1212.67	559.574	2259.11	2226.95	3119.86	5100.73	681.226	2677.58	1614.84	3116.19	1532.9	1907.23	12499.1	3436.55	4498.39	4543.04	2955.89	4857.84	15583.5	19525.2	1201.07	8824.71	8192.7	2863.76	1966.85	6181.09	3184.73	1062.48	3051.78	1935.2
M383T407			383.279	407.474			3719.59	2306.52	3199.18	2449.69	3429.16	3020.83	617.1	3346.29	4569.67	661.9	5831.58	5098.76	3901.64	2025.36	3413.5	2632.47	5228.92	6866.79	10117.2	5651.78	2988.37	6091.39	1979.38	2752.56	1853.8	8745.89	4284.6	3030.58	20882.7	17774	11327	16789.2	18289.3	17012.4	3520.06	71784.2	7206.81	89765.6	6039.27	13244.4	37608.1	40008.8
M383T421_2			383.246	420.596			4574.91	4318.41	6298.09	5768.19	5029.79	5197.88	825.459	4404.79	3923.04	1825.59	3930.4	5883.17	3993.4	1453.34	4874.96	5843.93	3012.28	8802.38	2575.46	5021.8	2500.65	3379.47	1923.89	1762.04	2075.42	845.962	1997.36	908.681	1692.98	2329.44	2284.54	1861.8	1363.71	1906.5	407.434	4225.43	55887.2	1844.93	71641.1	83712.4	43462.2	38210.1
M383T64			383.208	64.0325			12905.8	1754.99	577.3	2087.82	2516.86	3968.56	5047.77	1472.47	612.806	2495.91	2133	1318.33	1606.5	734.283	3604.65	6708.83	2818.16	2392.03	1778.23	3460.38	1933.69	4461.12	3998.35	4798.96	58521.8	13569.1	17069.9	23510.3	2255.04	8567.72	2837.75	3386.48	3697.56	4148.91	2530.65	1664.83	2731.38	651.661	2322.76	3368.33	2147.79	1040.74
M384T158			384.204	157.779			1170.89	1931.05	2987.08	1349.31	2370.08	1961.68	744.904	1504.27	2166.8	1564.84	32294.4	2043.78	7914.81	13631.7	1207.39	3535.34	2029.03	905.392	2524.67	2040.36	1054.94	362.203	1661.84	746.567	2004.93	1876.62	1330.43	731.688	828.439	2012.05	1284.5	1334.79	2581.49	1608.25	688.831	1767.72	1050.78	2062.67	1243.49	2117.84	1648.5	481.489
M384T365			384.403	365.281			410.055	794.337	808.849	5431.76	17038.9	4896.78	7095.59	752.329	490.083	493.302	677.858	1039.55	690.625	226.314	402.794	423.477	1105.45	1376.61	510.424	763.751	447.942	1069.96	679.202	892.049	3395.36	880.006	1383.32	1133.24	953.949	1127.29	4544.2	4751.28	446.724	2364.69	2100.36	1028.18	695.501	1773.83	665.295	578.168	948.195	492.159
M384T387			384.311	387.13			2281.3	3160.52	4370.96	3453.29	2798.53	3212.92	781.218	1383.78	948.155	2587.8	2044.85	1400.91	1673.1	643.858	2472.3	1723.88	1265.07	1684.25	1969.37	1822.97	442.542	15406.4	12633.8	11261.2	38168.3	15041.9	18502.3	11126.4	14473	14813.5	14863.7	20187.4	14381.3	15743.8	2492.85	2369.39	2442.04	3492.65	1981.84	2527.65	2562.71	560.213
M385T474			385.331	473.644			1799.75	1301.26	3449.02	2134.14	3246.38	2386.11	929.253	2634.37	1712.61	2722.43	2227.77	2406.37	2340.71	401.1	2360	1150.17	3946.69	2460.06	2437.69	2470.92	991.944	26347.2	9685.69	39770.7	6244.82	2237.76	16857.2	15754.9	2368.99	13814.7	3467.96	2545.62	13753	7190.04	6033.75	1390	1825.55	3552.21	1203.49	2181.44	2030.54	932.01
M387T224			387.145	223.591			884.737	828.017	891.471	1017.82	906.52	905.712	69.3669	1653.96	1148.39	1975.84	1061.11	1665.04	1500.87	385.231	4051.51	4784.57	3976.63	8301.91	1389.36	4500.8	2484.28	1357.59	1280.43	1089.19	1950.13	2955.25	1726.52	758.466	20211.5	12228.7	20484.5	20022.2	6279.36	15845.3	6376.12	2420	3609.77	2504.12	3299.65	2360.61	2838.83	575.073
M387T363_3			387.24	362.847			11586.2	15590.8	20857.2	17616.7	15826	16295.4	3370.83	9215.13	3639.9	9041.63	9634.26	6179.33	7542.05	2574.35	14452.1	5562.99	9300.86	6245.7	9235.03	8959.35	3509.37	29534.8	13592.1	10520.5	11821.6	22702.3	17634.2	8185.96	12479.4	15076.8	14972.5	18806.7	25587	17384.5	5111.43	1246.67	3655.53	2278.23	4115.07	3432.45	2945.59	1166.24
M388T234			388.148	233.644			913.197	862.087	952.065	1050.97	1259.36	1007.54	156.871	1323.74	853.328	1229.92	937.147	535.028	975.832	314.805	1493.1	2078.04	1433.76	3000.44	1041.93	1809.45	761.725	1538.88	1490.69	1356.91	2134.11	1858.03	1675.72	315.42	13958.7	5037.52	8813.49	13711	2637.93	8831.74	5070.83	1930.32	1619.99	1870.51	2106.1	1740.54	1853.49	185.259
M390T229			390.106	229.079			682.72	706.965	835.428	943.849	1032.49	840.291	150.244	627.185	827.135	1315.66	775.865	882.532	885.676	258.457	1882.38	3482.98	6436.59	3392.36	1944.89	3427.84	1846.92	1662.41	2187.2	1347.65	3245.9	2675.21	2223.67	763.644	5334.74	40158.9	5915.01	6477.44	19826.5	15542.5	15028.2	2279.81	1940.23	3113.32	2716.71	2403.2	2490.65	445.499
M391T271			391.176	270.673			22445	1810.64	1929.33	1626.46	2940.89	6150.46	9123.19	5645.65	3744.6	3266.71	1630.74	3691.2	3595.78	1432.03	14627.5	8475.75	10154.5	10158.6	2409.92	9165.26	4413.37	6363.34	2460.24	3984.64	41460.5	49651.1	20784	22840.6	33824.5	20555	34222	43474.3	10062.1	28427.6	13118.5	3930.35	2006.85	1508.8	1517.74	2857.96	2364.34	1033.5
M391T450			391.354	450.061			442.592	587.227	1427.58	3146.03	804.388	1281.56	1108.07	926.55	669.595	183.656	1277.76	8784.41	2368.39	3608.76	1106.55	954.887	992.182	3480.59	340.691	1374.98	1214.33	218.812	139.077	322.686	189.038	176.525	209.228	69.5752	146.305	101.475	97.9071	83.9482	120.905	110.108	24.1585	151.824	45.3658	379.443	221.886	62.8246	172.269	135.908
M394T364			394.23	363.897			669.907	4643.8	4472.74	6416.45	3636.37	3967.85	2103.2	2551.61	3840.57	2175.67	3970.37	3137.74	3135.19	783.636	2745.43	2775.94	3448.13	1690.56	4225.19	2977.05	939.274	44064.5	29152.5	27933.3	26412.4	20801.6	29672.9	8656.58	36837.4	41080.5	41145.6	36064.7	24473.4	35920.3	6815.86	4756.47	3622.92	3456.3	5323.62	2852.62	4002.39	1009.76
M394T423			394.329	422.815			4119.68	3155.76	4829.26	2729.37	6097.32	4186.28	1346.71	3974.82	1593.59	1453.96	3702.41	1597.17	2464.39	1259.51	2871.67	1850.82	1321.38	1838.51	890.326	1754.54	741.416	1234.64	828.9	960.857	819.982	1547.53	1078.38	311.183	885.52	1226.8	1875.71	350.397	688.668	1005.42	580.986	1376.7	25047.4	2308.49	49224.5	13528.6	18297.2	19791.1
M395T278			395.111	277.708			7186.12	7167.5	6138.38	5055.99	4979.51	6105.5	1080.04	3716.27	2875.96	6347.93	4769.82	4975.8	4537.16	1318.98	3850.99	11976.2	11671.9	4220.72	3094.88	6962.95	4457.39	3159.44	5272.36	3183.13	9505.32	35866.2	11397.3	13920.8	11892.1	11291.1	13246.2	18897	21884.4	15442.2	4692.94	516.867	885.165	1090.82	998.947	737.879	845.935	226.319
M395T381			395.327	381.16			1593.25	2113.52	3004.81	3004.91	2406.08	2424.52	604.496	2236.3	1526.46	4554.64	2550.67	2348.07	2643.23	1136	2623.4	2134.12	2793.04	2252.53	3638.64	2688.35	594.842	3223.22	2509.23	2511.82	16626.9	3288.08	5631.85	6157.73	8874.49	9696.06	6835	9232.7	7242.73	8376.19	1263.33	1087.81	37975.1	23735.8	1354.61	1550.65	13140.8	16937.5
M395T387			395.277	386.856			5180.07	4215.4	3025.06	2987.29	2321.01	3545.77	1140.44	4602.6	5690.03	3689.04	3776.71	5828.32	4717.34	1016.83	3484.34	5859.45	8289.77	5262.31	8244.96	6228.17	2056.4	35764.7	36089.9	26923.6	65275.3	41990.2	41208.8	14488.9	59037	34586.7	43254.4	63126.2	62230.9	52447	12813	72645.6	2911.13	60368.5	4417.49	1784.68	28425.5	35046
M396T343			396.154	342.989			892.884	841.781	2230.89	1901.88	917.369	1356.96	658.541	644.675	765.173	947.642	703.302	980.071	808.173	148.811	726.216	943.432	397.81	888.238	403.206	671.78	260.194	1489.54	2746.64	1052.56	5554.37	14019.9	4972.6	5353.63	633.524	1142.38	1141.77	459.559	671.365	809.718	313.734	940.531	800.069	1023.98	924.316	742.994	886.378	113.263
M396T380			396.331	380.401			841.225	633.575	876.055	1134.14	721.135	841.226	190.101	900.936	891.764	1362.28	786.468	879.929	964.275	227.159	660.771	687.466	830.859	889.659	686.024	750.956	102.474	1392.3	1133.18	1524.31	4927.63	1371.11	2069.71	1603.84	2860.39	2794.41	2009.9	2840.88	2114.72	2524.06	423.822	1389.84	7553.27	1513.34	5646.41	3207.12	3862	2686.37
M396T387			396.28	387.285			1414.83	548.358	1119.16	1354	1206.01	1128.47	344.78	1334.43	1727.36	898.729	1162.45	971.872	1218.97	331.132	1223.72	1093.41	2289.76	1616.72	1900.71	1624.86	490.306	8654.1	9167.52	6451.55	15616.7	10424.1	10062.8	3420.67	14630.2	8020.33	10901.4	15154	15224.9	12786.2	3210.16	17031.5	1243.49	14607.7	1576.57	1808.81	7253.62	7869.03
M396T445			396.347	444.939			10545.1	11385.7	10315.7	8579.94	9724.42	10110.2	1042.7	2880.28	1081.88	3192.33	1984.6	1058.48	2039.51	989.746	8681.59	7748.91	6756.76	8641.26	1308.21	6627.35	3075.86	30995.7	7153	13278.1	11566.7	10484.4	14695.6	9382.38	8589.73	9527.91	8726.96	14594.7	25457.3	13379.3	7189.8	3183.79	986.307	3103.93	886.081	927.282	1817.48	1211.67
M397T318			397.343	317.928			1055.7	464.387	946.971	1013.57	892.658	874.657	237.67	881.809	873.027	604.322	618.464	1699.76	935.477	447.514	767.215	539.71	619.794	792.092	855.635	714.889	130.613	4828.97	3888.06	4852.37	8021.95	4642.94	5246.86	1600.19	18208.5	17287.1	15232.7	19093.4	11182.2	16200.8	3150.45	4065.21	2353.99	1449.87	1654.33	1761.57	2256.99	1065.27
M397T329			397.256	329.461			1915.03	1813.72	2275.45	2044.45	2300.81	2069.89	215.54	2017.65	1804.85	2057.55	1931.79	2109.06	1984.18	119.375	1372.65	1297.06	1620.96	2236.47	1096.06	1524.64	440.044	25389.4	9977.05	29295.6	10659.7	7014.01	16467.2	10116.7	11012.4	7528.29	10465.4	11203.8	8673.05	9776.6	1605.56	11765.9	11058.3	11893.3	7196.08	8619.08	10106.5	2093.73
M397T368			397.416	367.857			350.887	2479.64	457.891	4196.94	18908.8	5278.84	7783.14	644.705	401.703	366.721	356.216	615.97	477.063	141.295	433.237	495.874	703.02	992.379	507.671	626.436	228.176	1137.03	564.12	1342.85	1649.65	687.454	1076.22	451.94	575.679	1006.93	1269.5	1774.95	775.345	1080.48	466.732	608.156	394.389	1063.38	801.528	413.373	656.166	281.397
M397T407			397.244	407.425			6976.15	9611.61	5928.92	7441.92	1948.11	6381.34	2818.31	7570.46	15443.4	5187.74	9812.29	10307	9664.18	3816.31	4231.81	7106.74	12720.3	12939.9	14933.8	10386.5	4507.81	5709.71	15075.9	9725.5	1606.26	5501.41	7523.75	5105.87	6265.96	5194.11	5866.1	3605.84	5262.89	5238.98	1014.61	6729.81	1396.22	6173.54	2725.85	1345.17	3674.12	2602.71
M397T545			397.404	545.298			563.837	389.096	823.92	409.443	789.291	595.118	204.91	646.225	990.428	462.475	825.819	5079.71	1600.93	1954.67	573.75	743.105	452.143	754.665	446.113	593.955	150.374	520.127	500.27	445.619	322.03	305.137	418.637	99.8843	2054.18	12152.1	1398.93	2450.14	925.186	3796.11	4707.9	296.929	302.012	578.25	329.399	272.78	355.874	125.929
M399T290			399.358	290.223			740.405	718.897	1983.05	43076.7	827.365	9469.28	18794.6	701.871	361.812	501.306	460.627	873.894	579.902	205.715	613.902	409.636	586.148	582.907	611.524	560.824	85.6949	1187.57	378.598	1145.73	5286.88	861.214	1772	1991.19	653.937	682.465	1492.13	868.287	416.105	822.585	407.332	390.444	482.193	310.225	417.653	532.092	426.521	85.3664
M399T361			399.285	360.683			1562.41	1557.47	914.121	2501.99	609.63	1429.12	728.369	1560.79	1637.31	1431.01	1628.16	2675.61	1786.58	503.776	1564.57	1882.74	543.857	3389.48	4496.97	2375.52	1563.98	6112.68	5070.07	3154.92	56831.6	7364.25	15706.7	23041.2	102035	95054	120146	88465.9	73929	95926	17060.3	35159.6	28758.5	20330.2	27515.5	23504.1	27053.6	5626.51
M399T451			399.212	451.157			1311.17	1535.82	1744.84	2504.23	1442.3	1707.67	472.51	3503.72	3392.4	730.779	19833.4	9772.41	7446.54	7679.96	4430.09	2220.12	1376.61	21288.5	784.56	6019.98	8646.74	1266.77	1027.27	477.825	1438.99	1143.44	1070.86	364.952	564.13	1009.72	1175.9	930.09	982.343	932.437	225.495	889.883	326.605	1121.85	717.304	272.412	665.611	364.23
M401T132			401.086	131.529			29131.1	7836.96	23197.9	10615.1	7638.68	15683.9	9865.08	6288.13	5581.51	6277.59	4971.41	2696.86	5163.1	1483.4	7346.01	8696.05	21548.9	5973.04	6051.07	9923.01	6593.59	3544.85	2811.13	3150.39	5120.59	13049.6	5535.31	4292.65	3461.73	11379.5	3255.42	3548.74	41933.7	12715.8	16693.1	2622.2	2828.81	2619.13	2548.68	3134.51	2750.66	238.771
M401T254			401.287	254.166			528.635	791.574	696.152	803.363	728.832	709.711	110.465	796.114	1070.15	701.592	846.11	974.72	877.737	145.875	768.835	830.797	641.943	934.38	663.917	767.974	120.779	8583.86	3240.34	9241.99	7590.15	1439.85	6019.24	3468.59	9276.77	3305.12	16706.8	7808.35	3900.2	8199.44	5388.09	9314.72	3851.97	4234.91	2678.11	2156.99	4447.34	2848.98
M402T412			402.317	412.106			763.139	505.601	822.984	936.592	1023.13	810.29	197.784	756.914	535.256	1197.22	609.286	1112.08	842.152	297.748	762.5	856.242	836.029	269.789	615.185	667.949	241.847	706.837	391.379	804.7	452.571	565.052	584.108	172.143	487.103	799.117	671.476	498.695	521.628	595.604	135.84	689.382	16168.9	956.105	38403.6	1842.71	11612.1	16331.3
M403T349			403.222	348.788			2509.49	4710.57	100903	20610.5	5213.91	26789.6	42052.2	2959.06	4902.99	2971.7	1131.63	16303.5	5653.77	6100.9	1166.81	4797.51	3137.89	3410.57	1153.57	2733.27	1567.86	23407.3	8669.79	59723	56595.4	10592.2	31797.5	24747.3	17434.9	21611.6	15738.9	21151.3	17735.2	18734.4	2538.69	9924.67	9000.12	12263.4	4620.1	5168.93	8195.45	3245.35
M404T441_2			404.316	441.023			4067.74	6253.6	5904.4	6078.66	6514.72	5763.82	974.59	2160.31	1564.99	1458.94	2043.26	2990.16	2043.53	608.377	7596.77	3537.37	5130.38	9114.65	1268.77	5329.59	3130.85	30881.5	8743.3	11860.7	8751.32	12068.7	14461.1	9319.46	5787.93	7284.19	7716.68	8402.12	17359.9	9310.17	4600.91	5298.34	1346.58	6304.57	875.963	749.01	2914.89	2668.27
M405T407			405.261	406.691			5402.76	3497.13	2125.52	2587.76	3644.33	3451.5	1260.05	5397.5	4959.92	3176.05	6690.95	4456.71	4936.23	1286.52	2493.01	4094.87	7857.77	4864.35	19747.7	7811.55	6950.92	8523.57	3570.05	4240.9	2566.62	8695.18	5519.26	2883.75	30792	30383.4	18916.6	22677.9	27703.7	26094.7	5153.77	71339.5	5915.97	85790.6	9049.44	10615	36542.1	38737.2
M406T179			406.217	178.889			1166.03	609.765	2782.72	1240.15	1680.66	1495.87	813.866	1175.29	1579.79	1131.99	39069.8	1220.75	8835.53	16902.4	941.078	3021.76	2016.05	1039.37	1199.49	1643.55	879.477	1339.61	1985.54	1080.03	2014.52	1444.97	1572.93	412.009	690.033	1831.13	1470.95	783.806	2387.91	1432.77	715.062	1453.01	783.076	1480.95	1385.26	1043.85	1229.23	304.634
M406T202			406.161	202.46			1568.31	752.467	1688.93	1379.81	1506.12	1379.13	367.628	1867.76	1391.74	4012.69	1121.19	1023.66	1883.41	1234.5	2849.68	3403.07	2562.81	3212.57	1432.95	2692.22	775.142	1791.4	1542.48	1564.37	24668.3	2929.7	6499.24	10172.8	4354.03	6447.86	5632.72	2963.16	2273.1	4334.18	1752.28	4043.39	670.526	3406.5	2686.1	782.452	2317.79	1530.47
M407T379			407.268	378.612			8880.18	8752.2	8509.4	9177.62	8538.03	8771.49	274.008	8590.29	7907.74	7240.46	8786.69	7762.48	8057.53	630.992	3125.36	3355.22	4264.07	3617	3282.01	3528.73	447.829	17645	16729.2	15850.2	16642.7	3785.26	14130.5	5818.03	16094.1	18161.8	16834.5	14756.2	18049.2	16779.1	1422.08	49997.3	9775.77	43895.6	3780.53	20776.9	25645.2	20492.1
M410T480			410.255	479.666			1316.05	1219.35	1126.95	1465.15	1416.02	1308.7	138.804	17000.1	10772.6	549.454	864.803	21078.8	10053.2	9288.29	888.575	960.922	1237.43	46000.1	695.942	9956.6	20149.9	1802.64	1838.62	1675.27	1804.35	1308.55	1685.89	219.937	2209.78	2557.69	2384.06	4269.94	2215.56	2727.4	874.073	916.342	570.954	811.78	389.87	305.873	598.964	262.882
M411T300			411.333	300.441			365.162	2041.8	1667.22	484.43	1789.99	1269.72	784.172	2377.96	1613.81	1686.78	1448	2055.23	1836.36	375.487	2279.54	1856.3	772.135	1046.76	368.957	1264.74	786.188	84604.9	32899.4	31634.9	10716.7	48227.6	41616.7	27486.9	30627.2	30961.9	36474	43428.4	22119	32722.1	7883.75	26417	12300.3	18939.7	29687.6	15672.6	20603.4	7285.98
M411T319			411.358	318.628			527.163	658.864	495.887	485.597	484.595	530.421	73.8411	434.571	333.005	477.713	286.668	382.967	382.985	76.501	310.127	572.983	741.274	1011.11	552.546	637.609	259.282	4895.39	1880.26	1836.82	2016.53	2919.8	2709.76	1299.21	3721.25	4649.95	4290.04	5039.07	3584.02	4256.87	613.814	2474.08	1402.41	1461.87	2101.79	901.137	1668.26	620.292
M411T384			411.431	384.278			228.334	395.197	250.155	2007.05	7236.96	2023.54	3008.29	278.165	301.044	256.442	289.963	431.596	311.442	69.1714	469.764	368.433	505.133	736.429	365.09	488.97	151.444	588.175	550.301	741.97	1280.94	601.433	752.565	304.168	567.968	483.116	1848.68	3122.88	465.016	1297.53	1175.19	685.083	278.117	872.676	451.665	378.894	533.287	241.784
M412T412			412.342	411.813			5143.6	19528.9	30251.8	21666.7	18595.7	19037.3	9029.83	10766.1	4802.87	26279.7	7963.19	6190.48	11200.5	8718.97	14061.3	9157.72	9129.39	12316.1	6800.93	10293.1	2877.95	18704.5	5178.7	6951.43	8686.3	3636.82	8631.55	5940.54	7805.26	12569.5	10007.4	5024.2	5418.93	8165.04	3175.24	1981.9	1330.33	2071.55	2411.06	2489.83	2056.93	460.055
M412T445			412.228	444.706			553.148	679.875	853.13	849.444	769.067	740.933	126.635	931.291	674.2	522.293	78016.3	809.899	16190.8	34561.8	757.74	488.206	528.137	894.673	384.496	610.65	209.315	518.854	536.344	723.002	364.344	392.011	506.911	142.506	337.256	330.162	406.244	382.565	495.724	390.39	66.8179	363.668	416.177	433.597	267.375	148.735	325.91	118.309
M413T368			413.41	367.88			3228.81	9127.27	5936.72	56555.3	4806.78	15931	22812.3	4384.86	1303.87	1122.97	1732.88	2448.18	2198.55	1324.43	3371.71	1816.1	3466.81	8281.61	3425.14	4072.27	2453.82	612.867	750.036	816.511	25040.1	10228.6	7489.63	10639.1	2403.06	1379.29	8518.08	6770.58	548.356	3923.87	3513.98	2266.37	1235.38	3625.06	2188.4	527.504	1968.54	1172.09
M415T51_4			415.255	51.4			1202.79	8388.04	9710.23	7319.13	4730.48	6270.13	3371.52	4006.05	3622.21	5244.17	5028	4263.26	4432.74	685.658	4051.93	6712	5239.71	7108.08	6842.15	5990.77	1305.43	11196.5	16201.6	9034.5	5596.41	10785	10562.8	3848.63	24205	25146.7	22592	19860.6	34193.1	25199.5	5412.45	17290	17857.9	15611.8	19806.8	21068.5	18327	2143.23
M418T257			418.198	257.33			1912.84	578.453	3584.76	2145.29	2850.34	2214.34	1124.09	1116.06	792.406	1111.69	918.728	1142.72	1016.32	153.853	1611.32	1731.08	1376.15	1223.9	1379.3	1464.35	203.454	5284.05	4630.7	4376.88	18653.8	16746.3	9938.34	7125.14	1802.56	1743.6	1746	1645.71	1366.85	1660.94	173.814	1172.8	1255.07	1070.89	1292.19	1273.74	1212.94	91.5711
M418T343			418.135	343.032			1061.78	552.387	1981.65	1080.88	996.152	1134.57	520.533	697.994	699.709	933.694	703.804	458.828	698.806	167.92	577.349	943.929	651.244	638.966	621.214	686.541	146.585	951.788	1603.48	648.449	4093.15	8620.43	3183.46	3327.58	674.257	419.226	526.959	336.029	676.373	526.569	151.724	311.584	454.141	363.472	362.817	361.629	370.729	51.6085
M421T279			421.041	278.634			2071.44	519.256	951.12	1324.14	1298.68	1232.93	571.072	2162.72	2780.61	2777.09	2608.54	2833.69	2632.53	275.946	1205.91	991.573	1719.61	578.806	1471.85	1193.55	439.616	622.792	669.943	802.06	564.38	765.736	684.982	98.5735	4374.51	3388	3811.4	4466.71	3036.55	3815.43	617.679	1794	1813.17	1810.16	1751.44	2019.76	1837.71	104.708
M421T394			421.347	393.781			2237.38	11060.8	14525.3	13455.3	7443.99	9744.55	5000.19	5344.63	3438.62	2862.44	6016.42	9058.94	5344.21	2451.61	4917.45	2640.14	4414.25	7451.2	1600.41	4204.69	2253.99	13422	7201.48	10116.2	9212.58	5174.17	9025.27	3111	6264.88	9708.41	7083.27	5994.56	7643.83	7338.99	1477.64	2376.57	55894.9	7726.07	66230.1	59583.5	38362.2	30691.6
M423T290			423.235	290.307			1023.29	895.531	1231.09	1377.11	1051.7	1115.74	188.916	931.247	1030.27	1212.14	1098.22	1496.17	1153.61	217.08	979.096	880.152	945.929	1495.08	868.143	1033.68	261.985	29791.7	4823.13	51048.1	2466.7	8351.16	19296.2	20801.7	1503.6	1484.38	1534.67	1341.24	1554.3	1483.64	84.0709	1407.79	1683.51	1497.47	1426.27	1571.84	1517.38	113.218
M425T292			425.161	292.222			3533	964.774	1231.25	1607.27	1249.31	1717.12	1040.48	1331.48	1259.04	1361.84	2826.4	690.752	1493.9	793.661	2630.14	1434.85	2218.07	1961.83	1175.9	1884.16	586.839	1972.42	1972.46	3940.29	6949.28	9782.52	4923.39	3394.78	10012.7	7236.33	11345	15601.4	3711.19	9581.32	4458.02	1881.07	1992.12	1689.03	1781.83	1893.96	1847.6	115.784
M427T271			427.284	271.452			1363.93	625.118	629.09	675.308	871.211	832.932	313.453	646.46	643.781	536.333	691.329	782.978	660.176	89.2257	896.237	357.396	887.182	767.961	807.843	743.324	222.367	24394.6	12065.6	23274.6	4416.71	3347.84	13499.9	10023.3	2203.22	2242.19	2940.75	2474.79	874.93	2147.18	769.393	1715.15	2084.58	1941.09	2524.06	1616.72	1976.32	357.244
M428T191			428.23	190.988			614.72	857.114	2693.11	1269.03	1633.03	1413.4	814.567	1149.73	1178.8	705.131	36819.4	1139.7	8198.55	16000.7	559.687	2436.06	1575.77	550.131	707.82	1165.89	827.317	635.458	1075.36	1250.68	1645.57	1637.45	1248.9	422.714	417.664	935.816	1137.29	770.426	1336.31	919.5	351.954	1196.55	715.24	1075.62	1252.84	400.96	928.242	361.411
M428T313			428.357	312.604			975.191	592.862	1583.4	1563.55	1255.93	1194.19	418.711	2703.59	2378.31	2608.48	3254.7	2951.37	2779.29	335.901	2709.59	1444.61	3188.6	1334.38	3834.17	2502.27	1092.08	4216.97	2491.95	2320.28	5974.39	2856.07	3571.93	1535.69	2892.37	4540.41	3804.14	4164.26	2672.9	3614.81	806.783	2256.67	1751.15	1198.3	3077.33	1671.24	1990.94	713.937
M429T191			428.732	191.405			565.34	580.388	1051.88	572.129	809.733	715.895	214.121	464.598	408.814	633.073	14898.6	598.549	3400.73	6428.19	305.52	1153.67	405.209	516.781	480.359	572.309	334.896	299.093	491.327	576.316	754.439	571.583	538.552	164.845	588.562	624.492	501.692	643.705	549.022	581.495	57.4276	660.042	574.631	631.493	524.699	697.74	617.721	68.7268
M429T254			429.28	254.155			1432.95	868.962	954.433	1140.54	1220.25	1123.43	222.926	400.903	1105.55	724.204	890.299	1322.79	888.75	353.719	836.068	880.418	1141.36	784.626	625.361	853.566	187.537	19694.7	5631.22	15627.2	10546.6	3296.32	10959.2	6807.67	2982.44	2986.94	3049.67	2888.32	2569.71	2895.41	190.971	2724.05	2919.13	2974.97	2982.35	3186.71	2957.44	165.402
M432T484			432.182	483.707			3570.68	1942.04	20406.1	10560.2	18698.3	11035.5	8443.45	11722.8	6476.84	187.564	4769.27	12122	7055.69	5004.58	4773.59	3187.94	3715.79	59677.3	435.076	14357.9	25384.9	414.282	352.454	324.318	319.415	345.835	351.261	37.8902	427.663	266.562	372.294	312.831	362.423	348.355	61.2635	259.53	85.8701	245.792	196.606	38.4854	165.257	98.3988
M433T129			433.158	128.705			1465.15	824.5	1252.54	1363.76	1124.51	1206.09	248.192	2657.43	1739.98	2934.69	1597.16	3179.18	2421.69	713.638	3488.94	2100.33	2604.07	4777.69	2128.28	3019.86	1131.74	6894.55	5262.66	5918.7	6396.42	6152.3	6124.92	602.664	16629.2	13117.3	16504.3	15145.3	8541.13	13987.5	3356.84	7561.12	7751.37	6402.91	8819.55	6355.3	7378.05	1030.5
M433T318			433.166	317.856			1558.85	1399.92	7282.85	5020.1	17435.2	6539.38	6572.66	764.709	793.371	1498.12	1012.89	1417.48	1097.31	343.979	463.179	1039.6	1082.67	1453.95	746.169	957.113	373.457	9396.63	15304.3	7853.92	17071.4	40987.3	18122.7	13355.1	8664.08	6742.98	6665.39	8348.78	6622.72	7408.79	1009.11	2747.64	871.907	3255.89	3913.88	3624.38	2882.74	1205.64
M435T382			435.271	381.939			1854.67	2201.71	2575.53	3441.49	3317.59	2678.2	690.508	3843.38	1153.33	3980.78	971.655	4651.91	2920.21	1724.43	2553.41	1540.14	3480.13	7072.04	1545.39	3238.22	2289.91	11237.1	16418.9	12244.5	16323.2	37583.3	18761.4	10779.4	39423.6	39450.2	24609.9	51991.6	47600.9	40615.2	10454.3	46060.3	33555.8	44839.8	31397	2999.34	31770.4	17364.5
M439T300			439.197	299.535			3516.01	2592.01	3042.26	3653.76	3232.51	3207.31	418.653	2141.03	2186.66	3219.69	2591.75	3124.68	2652.76	506.695	3079.59	2620.09	5010.79	5046.89	3333.26	3818.12	1134.48	5167.44	2417.13	13497.7	4320.71	5119.09	6104.41	4280.39	9860.9	9731.79	10803.4	6521.16	5931.39	8569.73	2188.85	4716.74	5462.89	3681.18	7424.35	5932.96	5443.62	1396.21
M439T323			439.364	322.632			528.71	461.894	492.089	459.55	486.116	485.672	28.024	259.55	225.658	355.688	310.803	342.022	298.744	55.088	379.694	435.185	338.266	671.632	424.535	449.862	129.823	19485.2	8793.8	6119.34	5073.16	13159.2	10526.1	5902.41	11763.8	11202.6	12458.1	13073.9	11557.7	12011.2	749.95	7220.16	4459.26	4663.74	7649.48	3855.28	5569.58	1735.12
M439T399			439.462	399.324			169.322	488.813	187.788	2854.71	20000.4	4740.21	8604.08	675.123	135.077	133.866	196.637	164.98	261.136	232.852	345.965	943.225	634.118	1219.22	365.13	701.531	377.674	617.434	166.255	308.574	1841.48	475.469	681.842	670.196	332.836	566.16	1518.79	3216.15	262.628	1179.31	1244.66	394.26	643.011	552.966	1219.96	702	702.439	311.718
M441T324			441.369	323.536			6977.37	6860.59	11822.3	15063	13240	10792.6	3718.29	9519.45	7486.62	10078.2	10054.1	9023.13	9232.29	1068.23	13253.5	10060.1	10358.2	10182.8	12701.7	11311.2	1537.27	25545.2	17077.9	14556.9	56930.9	11830.7	25188.3	18472.6	21012.3	27671.1	19596.8	24274.7	22069.2	22924.8	3154.98	5224.08	8616.83	7173.34	4906.3	3588.47	5901.81	1986.83
M442T283_1			442.241	283.296			4511.61	1427.19	1490.94	1383.4	1195.39	2001.71	1407.39	1517.65	1776.01	1529.88	1768.72	2479.77	1814.41	392.202	1622.65	1974.37	2113.76	4196.16	1207.15	2222.82	1157.53	11968.9	11168.5	8956.07	16065.3	8894.46	11410.7	2932.26	9877.47	9835.18	15493.4	9706.03	12971.4	11576.7	2583.87	3073.61	4981.9	5078.94	3469.61	4218.09	4164.43	891.646
M445T388			444.758	388.432			648.833	749.059	850.79	1052.73	617.624	783.807	175.961	981.905	791.613	516.219	1041.95	903.283	846.995	207.279	1050.47	1275.77	2112.01	1224.38	1341.94	1400.91	411.938	8338.09	4204.24	5258.47	6156.64	6289.4	6049.37	1527.86	10398.7	10654.5	10779.1	9187.56	6303.3	9464.63	1876.62	2734.2	2308.43	2534.39	3606.41	1677.02	2572.09	701.462
M445T462			445.389	461.714			2699.9	770.359	551.862	1012.23	4521.82	1911.23	1687.81	774.667	701.448	431.742	475.081	1125.69	701.725	278.084	513.849	848.121	534.727	907.775	568.408	674.576	187.858	455.495	507.633	1272.9	557.801	993.74	757.514	358.807	463.944	382.93	695.093	520.309	19433.9	4299.24	8461.32	618.609	399.128	1844.69	2066.17	2740.52	1533.82	995.151
M446T418			446.327	418.438			3361.84	8375.54	12429.6	8821.14	13251.9	9248.01	3928.88	3666.66	913.559	5006.36	1582.13	1504.32	2534.61	1731.16	14911.5	9199.44	5376.55	10152	2184.16	8364.73	4844.58	31422.2	4178.96	7180.34	11090.9	4498.87	11674.2	11381.8	12352.6	17169.7	15446.3	9716.83	5675.72	12072.2	4580.13	2306.86	1364.37	2102.54	2345.13	1052.18	1834.22	589.23
M449T379_2			449.372	378.822			1837	5930.21	4644.53	40418.8	32024	16970.9	17883.4	2422.15	925.294	1183.85	1053.52	1402.95	1397.55	599.351	2366.63	2028.58	2902.09	7543.68	994.722	3167.14	2543.66	2457.07	2521.57	3049.05	14189.8	9208.06	6285.12	5251.63	3993.1	6456.97	12228.3	4431.54	2861.3	5994.25	3719.54	5085.95	5516.27	7478.91	2794.06	5059.84	5187	1666.87
M450T199			450.244	199.452			1070.75	988.283	2115.48	925.688	1374.45	1294.93	489.962	741.552	880.508	519.676	34650.5	1265.81	7611.6	15117.6	369.554	1611.55	1512.22	666.457	645.752	961.107	561.918	737.707	1331.61	840.618	1579.93	1636.03	1225.18	415.78	1209.62	1462.87	1097.36	242.157	1441.08	1090.62	498.872	1222.49	683.529	910.329	1486.61	1458.99	1152.39	349.66
M452T379			452.296	378.534			2915.7	2515.25	2514.81	2602.84	3020.23	2713.76	237.695	2758.97	2487.43	2442.34	2380.04	2230.01	2459.76	193.478	1536.2	938.371	814.241	1076.62	1635.47	1200.18	365.769	5654.05	5783.54	5775.39	5130.64	2184.05	4905.53	1544.75	5744.6	5722.25	4857.55	4942.42	4379.84	5129.33	591.741	3277.68	966.425	3536.6	27978.9	28994.2	12950.8	14222
M453T234			453.175	234.111			661.248	961.339	832.886	1152.77	998.163	921.282	184.753	781.889	456.668	2510.05	2049.91	1155.68	1390.84	863.972	2355.09	5330.85	7141.57	3771.42	3631.42	4446.07	1839.81	1510.8	1567.88	1482.05	2285.51	2290.08	1827.26	421.542	1479.72	20533.2	2614.63	1581.91	11825	7606.89	8420.92	1573.72	1300.57	1737.87	1568.03	1674.81	1571	167.163
M453T291			453.156	291.256			918.001	758.651	1388.99	1398.15	638.968	1020.55	354.629	667.931	911.871	1031.13	965.303	1219.88	959.221	200.15	611.816	944.845	864.652	1004.69	787.114	842.623	152.932	3257.51	2196.12	2695.02	13456.6	8315.97	5984.25	4844.51	1660.53	1454.29	1685.23	1662.07	1181.31	1528.69	215.57	1085.04	1024.87	880.05	888.579	1020.53	979.816	90.8816
M454T355			454.293	354.762			2729.21	2454.26	2207.77	2107.66	2312.87	2362.36	241.996	2188.53	3572.23	5002.71	2730.92	2592.4	3217.36	1117.93	2052.68	1732.84	1965.1	6196.14	2694.12	2928.18	1861.27	9743.34	23316	15248.1	1939.23	4380.27	10925.4	8619.73	8449.66	9851.5	8529.51	4125.35	4492.82	7089.77	2601.98	18521.5	43468.4	23480.7	34678.6	69789.2	37987.7	20259
M456T394_2			456.347	394.408			2434.77	7193.35	11653.5	12807.9	2549.7	7327.86	4887.08	4056.16	5773.58	2818.87	7801.39	6844.25	5458.85	2027.49	6157.63	1761.6	7738.09	5176.27	3348.08	4836.33	2342.57	18936.5	10156.8	12414	2447.75	6381.96	10067.4	6241.33	10335.1	15699.5	10684.9	8397.12	12211.6	11465.6	2728.81	4688.97	1605.27	1427.84	3874.08	1386.5	2596.53	1567.08
M460T424			459.867	424.477			1482.36	2836.89	3299.28	1919.63	1803.19	2268.27	765.147	2400.76	1223.52	320.634	1650.07	1291.04	1377.21	753.245	2136.13	1337.82	898.007	1249.35	452.804	1214.82	621.725	722.091	734.719	1146.83	834.672	574.256	802.513	213.747	577.176	718.295	611.221	410.578	498.706	563.195	116.199	418.427	116.493	424.916	257.287	172.91	278.006	140.411
M463T380			463.267	380.381			3769.19	3530.18	2235.41	3949.95	3454.19	3387.78	673.453	2471.18	2918.24	4600.39	3220.58	1663.21	2974.72	1081.67	2554.68	2961.73	3219.22	2756.84	3067.8	2912.05	261.191	8890.12	6361.1	6313.86	5027.12	6934.68	6705.38	1406.59	5572.58	9117.32	11929.4	2179.27	12303.4	8220.38	4322.55	6436.68	82704.8	6368.2	7812.73	85453.7	37755.2	42303
M468T365_1			468.275	365.147			1782.37	3892.64	2409.6	3516.5	1494.77	2619.18	1053.01	1234.64	1527.53	3346.89	1211.23	2183.32	1900.72	898.553	1241.89	1307.56	1316.51	2319.28	1037.14	1444.48	501.84	10456.9	8503.13	8615.32	23006.8	4811.08	11078.6	6975.85	4309.68	6304.07	4393.61	5396.82	4640.05	5008.85	841.352	3558.23	73375.7	2642.03	1041.28	74724.7	31068.4	39250.1
M470T469			470.361	469.15			656.985	694.667	1219.06	1475.11	2026.23	1214.41	571.816	1611.42	1214.37	1066.56	1282.3	6088.41	2252.61	2153.52	536.729	1032.25	832.048	1637.35	606.079	928.892	441.582	831.432	2277.43	1987.88	2726.87	917.535	1748.23	840.504	926.304	1475.24	1708.54	746.871	3281.07	1627.61	1003.9	1986.67	7092.93	3704.9	22606.7	12615.7	9601.39	8325.71
M472T205			472.257	205.489			756.898	616.729	2086.35	827.72	937.015	1044.94	593.652	703.702	763.462	505.299	32389.8	892.556	7050.96	14165.5	556.412	1521.93	827.617	656.62	551.196	822.754	406.555	781.444	721.615	872.242	723.631	674.718	754.73	75.8096	555.576	729.793	736.168	622.595	2038.57	936.54	620.697	726.213	669.498	698.214	584.184	817.215	699.065	84.8072
M472T418			471.867	418.463			2371.77	1642.22	2556.97	1930.15	2091.71	2118.56	360.361	2096.58	3468.1	588.128	2057.36	2062.23	2054.48	1018.62	1793.49	2260.07	1490.83	1470	2340.13	1870.91	413.156	1004.2	1030.31	1423.87	616.147	1108.9	1036.69	288.562	980.742	986.932	1001.04	642.56	868.534	895.961	151.219	713.843	791.704	410.398	855.468	597.539	673.79	175.858
M475T107			475.093	106.784			3880.37	1380.44	1452.93	616.538	1423.54	1750.76	1240.42	9868.99	7711.77	8538.02	4473.54	8085.14	7735.49	1997.44	13602.7	11476.1	9465.95	9279.77	4326.31	9630.16	3444.89	1326.17	1220.03	1284.04	1797.68	1758.35	1477.26	277.491	5792.93	3525.04	4316.11	4809.29	1728.35	4034.35	1528.85	1444.98	1221.25	1297.93	1289.85	1416.17	1334.04	93.5821
M476T361			476.296	361.462			5701.28	7644.38	5663.83	7547.84	8573.42	7026.15	1290.31	777.377	1465.75	801.02	1010.43	1888.52	1188.62	479.001	941.325	920.809	1237.13	2019.06	826.962	1189.06	488.787	6079.04	5215.11	9367.58	14836.2	3065.19	7712.63	4582.29	16926.9	17682.3	15506.9	12676.9	705.159	12699.6	6972.18	9267.04	5373.26	8411.38	4711.99	4378.24	6428.38	2250.15
M476T472			476.337	472.185			9671.34	1573.96	1411.3	2085.69	550.83	3058.62	3737.7	1856.9	1881.24	2731.31	4379.56	3916.65	2953.13	1157.9	5140.63	8769.72	5658.41	2712.46	6504.78	5757.2	2196.28	1416.04	1357.9	411.138	22069.2	7289.86	6508.82	9115.71	448.582	5125.34	2760.69	1893.86	13836.7	4813.03	5322.27	1032.54	661.716	1067.97	533.905	632.094	785.645	246.461
M477T397			477.374	396.843			860.659	2390.72	2880.58	3991.51	544.582	2133.61	1433.64	1549.38	2821.14	872.203	2273.31	2946.66	2092.54	877.112	2125.7	1109.88	3331.6	2525.06	1759.66	2170.38	832.104	7791.73	8791.9	8775.22	5576.87	4046.99	6996.54	2105.63	3866.34	5769.12	4272.79	3521.03	8054.8	5096.82	1862.65	5592.21	2915.58	7987.8	3433.08	3777.05	4741.14	2075.95
M479T368			479.299	368.269			3673.62	3552.17	2804.23	3301.61	3096.87	3285.7	349.72	2956.16	3772.97	2154.44	2568.95	2399.42	2770.39	631.916	726.257	1510.13	2525.68	1649.26	1931.32	1668.53	655.192	9386.58	9740.08	8581.69	7346.71	1323.77	7275.77	3451.99	8434.68	8428.58	8763.41	7321.31	8627.85	8315.17	573.059	3864.17	24564.9	3392.85	28872.5	25446.6	17228.2	12519.7
M480T363			480.308	363.394			1456.29	1444.55	2149.42	2863.39	1960.08	1974.75	585.306	4618.35	8764.16	6232.24	6682.45	5774.55	6414.35	1521.65	4449.69	3225.09	8881.86	13741.4	13483.7	8756.34	4908.06	5607.32	24549.7	13339.3	3821.75	3160.32	10095.7	9042.23	11093.4	10010.5	9021.38	3201.76	4587.07	7582.82	3480.49	23773.2	57251.1	24507.1	40110.2	86580.8	46444.5	26282.4
M480T395			479.869	395.426			285.095	339.301	338.248	781.112	196.628	388.077	227.264	342.443	329.487	312.39	417.6	609.86	402.356	122.764	107.11	237.871	445.431	502.697	205.607	299.743	167.491	1090.86	1102.57	1577.62	1696.88	314.75	1156.54	544.315	1258.36	513.446	968.723	805.227	820.974	873.346	271.221	2732.81	212.617	342.899	94.9768	259.216	728.504	1124.02
M480T433			479.883	432.829			1269.48	1887.87	2139.53	1380.51	1855.31	1706.54	367.356	2175.93	1194.63	502.335	2226.23	1513.88	1522.6	719.464	2494.43	1957.65	1670.51	1045.75	1041.01	1641.87	621.245	553.095	454.951	763.846	463.493	444.162	535.909	134.598	823.324	740.243	1013.66	447.703	425.273	690.04	251.914	611.364	135.356	187.071	157.32	385.505	295.323	202.711
M481T357			481.271	356.643			1181.14	7295.75	5825.26	3246.99	6257.11	4761.25	2495.17	896.032	1198.12	1010.61	1457.97	1773.51	1267.25	353.95	889.159	853.999	1066.63	646.476	1537.19	998.691	336.002	14384.8	8021.12	9349.65	30253.2	5897.84	13581.3	9829.24	14629.4	15291.2	10301.3	12937.4	10082.7	12648.4	2402.28	8099.04	6494.37	6944.79	5907.06	6462.6	6781.57	823.308
M481T363_2			481.319	362.865			5156.5	10462	10420.6	11273.7	7673.59	8997.28	2542.49	1818.14	3493.55	2134.2	2354.85	1582.23	2276.6	741.569	1344.4	1444.68	2617.85	6042.89	4535.88	3197.14	2045.11	12574	12074.1	12749	19467.9	5793.37	12531.7	4841.86	19585.7	19512.7	17221.1	14683.1	15945.3	17389.6	2166.21	9945.41	17871.8	8167.33	13478.5	25696.8	15032	7021.63
M483T211			483.279	210.508			435.413	485.798	666.759	505.585	512.209	521.153	86.7827	329.264	332.134	463.559	7473.18	558.156	1831.26	3155.39	361.105	430.999	306.373	510.886	399.149	401.702	76.684	697.131	490.703	710.67	604.058	664.144	633.341	89.723	611.914	564.027	487.34	622.507	448.621	546.882	76.5552	666.163	593.656	644.16	542.046	620.08	613.221	48.1035
M483T486_2			483.42	486.135			1343.56	3457.62	2029.13	2217.85	1971.49	2203.93	774.072	1600.73	6109.29	3879.68	2122.1	4471.41	3636.64	1824.05	1491.37	1326.22	2279.46	1940.42	1529.36	1713.37	388.919	3555	1724.85	3148.79	15179.5	4640.82	5649.79	5428.66	3047.96	2263.47	2807.78	4272.51	6549.24	3788.19	1709.67	2629.56	653.604	1752.84	586.865	345.734	1193.72	968.677
M484T397			484.36	396.507			5012.57	13355.5	20178.1	20244	4524.13	12662.9	7733.01	8712.52	14715	6507.08	14849.9	13443.5	11645.6	3805.54	14072.3	5149.44	15756	12940.8	11022.4	11788.2	4091.1	37548.8	25507.4	31546.7	20741.4	16564.2	26381.7	8371.72	22805.1	31482.1	20890.9	17594	26464.1	23847.2	5340.16	9195.49	4466.63	4605.07	6006.19	3188.13	5492.3	2298.15
M487T369			487.291	368.639			4445.95	5858.09	6100.12	7095.04	4824.16	5664.67	1056.5	3409.21	6543.31	3320.23	5172.89	5178.24	4724.78	1361.71	3912.06	3179.91	4982.86	3263.5	5603.92	4188.45	1070.48	38680.8	36264.4	26157.9	21435.9	29174.2	30342.6	7120.38	21175	28732.5	27476	17659.4	18553	22719.2	5102.22	6480.84	3035.96	4813.22	8580.52	4142.81	5410.67	2167.77
M487T374_3			487.255	373.891			3765.46	3232.08	2926.24	3877.26	3314.89	3423.18	393.235	3678.22	3359.77	3080.48	4347.96	3175.55	3528.4	511.786	1328.71	1048.76	1423.42	980.49	949.228	1146.12	215.588	4076.14	4714.65	4832.41	2807.78	1074.93	3501.18	1576.61	3661.39	3505.66	2911.7	2821.27	3743.88	3328.78	431.786	1157.3	1142.4	1300.21	1023.25	836.124	1091.86	173.462
[truncated: 279 more rows]
